# Supplementary material
Source: publisher figshare collection journal article supplement (https://gsajournals.figshare.com/ndownloader/files/15132554)
Supplement: Supplementary file 1 [file 15132554]

## Sheet: Plan1
Full mRNA-Seq data for all 9514 evaluated genes
GENE ID	NAME	FPKM AVG 5L 0D	FPKM SD 5L 0D	FPKM AVG 5L 10D	FPKM SD 5L 10D	FPKM AVG 5L 25D	FPKM SD 5L 25D	FPKM AVG 5L 55D	FPKM SD 5L 55D	FPKM AVG 5L 115D	FPKM SD 5L 115D	FPKM AVG DD	FPKM SD DD	log2(5L 10D/5L 0D)	p-value 5L 0D-5L 10D	q-value 5L 0D-5L 10D	log2(5L 25D/5L 0D)	p-value 5L 0D-5L 25D	q-value 5L 0D-5L 25D	log2(5L 55D/5L 0D)	p-value 5L 0D-5L 55D	q-value 5L 0D-5L 55D	log2(5L 115D/5L 0D)	p-value 5L 0D-5L 115D	q-value 5L 0D-5L 115D	log2(DD/5L 0D)	p-value 5L 0D-DD	q-value 5L 0D-DD	log2(5L 25D/5L 10D)	p-value 5L 10D-5L 25D	q-value 5L 10D-5L 25D	log2(5L 55D/5L 10D)	p-value 5L 10D-5L 55D	q-value 5L 10D-5L 55D	log2(5L 115D/5L 10D)	p-value 5L 10D-5L 115D	q-value 5L 10D-5L 115D	log2(DD/5L 10D)	p-value 5L 10D-DD	q-value 5L 10D-DD	log2(5L 55D/5L 25D)	p-value 5L 25D-5L 55D	q-value 5L 25D-5L 55D	log2(5L 115D/5L 25D)	p-value 5L 25D-5L 115D	q-value 5L 25D-5L 115D	log2(DD/5L 25D)	p-value 5L 25D-DD	q-value 5L 25D-DD
MAC_00001	Acid phosphatase	0	0	0	0	0	0	0	0	0.0394743	0.0683716	0	0	0	1	1	0	1	1	0	1	1	inf	1	1	0	1	1	0	1	1	0	1	1	inf	1	1	0	1	1	0	1	1	inf	1	1	0	1	1
MAC_00002	Uncharacterized protein	0.685601	0.150686	1.33799	0.445521	0.876342	0.672397	0.333886	0.307436	0	0	0.914056	0.309814	0.964627	0.37405	0.56902	0.354126	1	1	-1.03801	1	1	#NAME?	1	1	0.414914	1	1	-0.610502	0.57875	0.743568	-2.00264	0.2866	0.478297	#NAME?	0.00135	0.00688777	-0.549713	0.64535	0.792136	-1.39214	1	1	#NAME?	1	1	0.0607886	1	1
MAC_00003	Uncharacterized protein	36.2821	5.69513	34.5868	4.35984	41.6039	4.0324	40.8065	6.57193	40.4442	3.85714	36.7756	1.8674	-0.069036	0.71415	0.839257	0.197461	0.2817	0.472846	0.169539	0.3546	0.549775	0.156673	0.3971	0.591312	0.0194897	0.9141	0.957078	0.266497	0.14995	0.305971	0.238575	0.19835	0.373202	0.225709	0.22765	0.410303	0.0885256	0.63535	0.785073	-0.0279215	0.8769	0.936697	-0.0407875	0.822	0.905139	-0.177971	0.3329	0.528288
MAC_00004	Transcriptional adapter 2	51.5851	1.57923	46.1467	5.58097	38.4262	2.10535	35.3937	1.64773	36.2098	2.79754	33.2504	1.17181	-0.160727	0.20455	0.381219	-0.424863	0.00095	0.00507718	-0.543462	5e-05	0.000362775	-0.510574	0.0004	0.00238366	-0.633582	5e-05	0.000362775	-0.264136	0.04045	0.114775	-0.382735	0.00375	0.0164672	-0.349847	0.00735	0.0289962	-0.472855	0.00015	0.000993023	-0.118599	0.3618	0.556632	-0.0857105	0.50875	0.689168	-0.208719	0.1069	0.239482
MAC_00005	Galactose-1-phosphate uridylyltransferase	59.017	3.10551	51.9666	3.63936	47.1305	2.5132	42.7761	0.978448	40.4546	1.61281	39.3782	2.49969	-0.183545	0.15165	0.308458	-0.324468	0.01095	0.0402222	-0.464325	0.00075	0.00413583	-0.544824	5e-05	0.000362775	-0.583731	0.0001	0.000686749	-0.140923	0.2779	0.468547	-0.28078	0.03155	0.0945194	-0.361279	0.006	0.0244806	-0.400186	0.00225	0.0106898	-0.139856	0.29095	0.483024	-0.220356	0.09625	0.221764	-0.259263	0.0512	0.13771
MAC_00006	Transmembrane domain-containing protein	88.29	5.60557	78.386	8.44844	139.073	10.9855	149.021	8.76956	160.333	18.7036	155.833	15.4517	-0.171655	0.2338	0.417841	0.655517	5e-05	0.000362775	0.755196	5e-05	0.000362775	0.860746	5e-05	0.000362775	0.819674	5e-05	0.000362775	0.827172	5e-05	0.000362775	0.926851	5e-05	0.000362775	1.0324	5e-05	0.000362775	0.991329	5e-05	0.000362775	0.0996792	0.44405	0.634156	0.205229	0.1201	0.260445	0.164157	0.21055	0.388999
MAC_00007	Very-long-chain 3-oxoacyl-CoA reductase	162.079	2.62226	135.082	15.0817	140.369	10.0713	167.55	3.55221	186.261	5.77635	184.315	4.64275	-0.262865	0.03055	0.0921111	-0.207476	0.0853	0.202748	0.0478981	0.6876	0.82154	0.200627	0.0952	0.219931	0.18548	0.1239	0.266572	0.0553882	0.65465	0.798925	0.310763	0.0114	0.0415477	0.463491	0.00025	0.00157207	0.448344	0.0004	0.00238366	0.255374	0.03525	0.103136	0.408103	0.0011	0.00576616	0.392956	0.0017	0.00840203
MAC_00008	Histidyl-tRNA synthetase	385.421	13.2851	334.327	12.5201	302.255	11.502	310.713	14.5227	323.23	18.6062	343.81	23.8126	-0.205179	0.1238	0.266435	-0.350672	0.01	0.0373265	-0.310852	0.02165	0.0698842	-0.253877	0.05755	0.15059	-0.164824	0.2178	0.398301	-0.145493	0.2681	0.457504	-0.105674	0.4206	0.61307	-0.0486989	0.70845	0.83532	0.0403548	0.75645	0.865939	0.0398198	0.76045	0.868425	0.0967946	0.4603	0.648748	0.185848	0.15575	0.314434
MAC_00009	Nucleoporin Nup157/170	57.5867	4.38953	45.2759	6.25507	50.5044	6.46064	65.2477	5.18957	63.7048	1.20547	60.3836	3.01475	-0.346992	0.0049	0.0206171	-0.189327	0.11905	0.258827	0.180191	0.1409	0.292756	0.145666	0.2365	0.420997	0.068421	0.57775	0.742821	0.157665	0.1938	0.367134	0.527183	5e-05	0.000362775	0.492658	5e-05	0.000362775	0.415413	0.00045	0.00264476	0.369518	0.00315	0.0142182	0.334993	0.0066	0.0265191	0.257748	0.03605	0.104961
MAC_00010	Cadmium resistance transporter, putative	93.2783	3.0964	86.1485	2.01358	72.1904	3.63699	73.361	6.17835	76.5127	5.20261	75.2214	5.70458	-0.114716	0.3587	0.553704	-0.369734	0.0038	0.016652	-0.346529	0.00705	0.0280143	-0.285842	0.0242	0.0765331	-0.310399	0.01615	0.0552113	-0.255019	0.04945	0.134034	-0.231813	0.07165	0.177742	-0.171126	0.18155	0.350479	-0.195683	0.1287	0.274244	0.0232054	0.8637	0.929234	0.0838924	0.52105	0.699117	0.0593358	0.65295	0.797695
MAC_00011	Uncharacterized protein	54.0982	2.03333	54.9893	5.93487	48.173	3.79006	70.6927	5.08163	67.5181	8.91354	61.1744	6.3257	0.0235715	0.86145	0.92792	-0.167355	0.22795	0.410725	0.385982	0.0039	0.0170189	0.319695	0.0162	0.0553381	0.177347	0.1888	0.360344	-0.190927	0.172	0.337435	0.36241	0.0073	0.0288364	0.296123	0.0284	0.0869882	0.153776	0.2575	0.445568	0.553337	5e-05	0.000362775	0.48705	0.0005	0.0029	0.344702	0.0132	0.0467669
MAC_00012	Uncharacterized protein	11.2864	2.43218	8.59723	0.979601	8.74799	1.60084	12.3979	3.57786	10.9144	2.08219	11.3015	0.0793539	-0.392637	0.11415	0.251126	-0.367558	0.13885	0.289619	0.135517	0.56155	0.730819	-0.048354	0.8367	0.913341	0.0019301	0.9774	0.988152	0.0250789	0.91925	0.959564	0.528155	0.0341	0.100487	0.344283	0.16735	0.331084	0.394567	0.11495	0.252449	0.503076	0.04365	0.121767	0.319204	0.19575	0.369741	0.369488	0.1356	0.284691
MAC_00013	Glycosyl hydrolase, putative	2.76601	0.279298	3.58117	0.446133	3.82316	0.174556	4.68952	0.47818	3.52569	0.410987	3.61328	0.558148	0.372625	0.16475	0.327387	0.46696	0.0788	0.191046	0.761634	0.0044	0.0188498	0.3501	0.1876	0.358753	0.385503	0.1524	0.309589	0.0943353	0.7099	0.836348	0.389009	0.1177	0.256744	-0.022525	0.91925	0.959564	0.0128784	0.97375	0.986393	0.294674	0.22915	0.412093	-0.11686	0.63995	0.788182	-0.081457	0.7495	0.861414
MAC_00014	Esterase-like protein	99.2857	5.87977	90.1424	2.89913	103.672	2.06255	94.6123	5.98653	84.2486	4.93343	89.8292	5.66349	-0.13938	0.2663	0.455425	0.0623661	0.6108	0.767309	-0.0695589	0.5744	0.740472	-0.236934	0.058	0.151519	-0.144402	0.2491	0.435839	0.201746	0.09655	0.222258	0.069821	0.56905	0.736482	-0.0975541	0.429	0.620806	-0.00502195	0.96645	0.983056	-0.131925	0.2816	0.472749	-0.2993	0.0152	0.0525074	-0.206768	0.094	0.217895
MAC_00015	RadR putative transcriptional regulator	1.87166	0.287354	2.39583	0.895407	2.40848	0.652848	3.30445	0.521563	2.55379	0.586152	2.69766	0.104816	0.356211	0.21345	0.392829	0.363806	0.20475	0.381466	0.820092	0.0037	0.0162849	0.448324	0.11275	0.248949	0.527392	0.06085	0.157225	0.00759415	0.97175	0.985683	0.463881	0.07525	0.184415	0.092113	0.72675	0.847295	0.171181	0.52135	0.699324	0.456287	0.07555	0.185001	0.0845189	0.74595	0.859422	0.163587	0.5278	0.704626
MAC_00016	Putative ABC transporter	0.460999	0.065398	0.278471	0.108914	0.406931	0.13132	0.758496	0.112154	0.551588	0.1239	0.446052	0.293167	-0.727238	1	1	-0.179977	1	1	0.718379	1	1	0.258828	1	1	-0.0475499	1	1	0.547261	1	1	1.44562	1	1	0.986066	1	1	0.679688	1	1	0.898356	1	1	0.438805	1	1	0.132427	1	1
MAC_00017	Histidinol-phosphatase	101.324	2.59681	86.295	5.23991	77.3763	7.46357	89.7535	10.4473	109.566	7.70416	100.036	3.4209	-0.231621	0.06105	0.157647	-0.389006	0.0024	0.01129	-0.17493	0.1622	0.323929	0.112827	0.36535	0.56032	-0.0184545	0.87675	0.936658	-0.157386	0.2197	0.400622	0.0566911	0.65625	0.799928	0.344448	0.0076	0.029802	0.213166	0.0897	0.210409	0.214077	0.09095	0.212539	0.501834	5e-05	0.000362775	0.370552	0.0039	0.0170189
MAC_00018	Histone deacetylase	13.6786	0.442908	10.5085	0.675634	11.1685	1.52907	10.126	0.520996	11.1701	0.373151	10.2124	0.122659	-0.380366	0.00595	0.0243157	-0.292476	0.0304	0.0917857	-0.433854	0.00195	0.00946249	-0.292276	0.0311	0.0934367	-0.421588	0.00205	0.00987573	0.0878899	0.5212	0.699206	-0.0534877	0.70255	0.831325	0.08809	0.5234	0.700925	-0.0412224	0.7673	0.872452	-0.141378	0.30825	0.501757	0.00020014	0.99515	0.9968	-0.129112	0.35095	0.546424
MAC_00019	Queuine tRNA-ribosyltransferase catalytic subunit 1	64.4572	1.68525	54.1979	8.31811	51.4316	3.5328	69.3164	6.72089	62.6731	5.53345	69.0951	5.00193	-0.250104	0.0512	0.13771	-0.325685	0.01165	0.0422559	0.104857	0.40615	0.60002	-0.040494	0.74795	0.860556	0.100243	0.4249	0.617047	-0.0755813	0.55365	0.72476	0.35496	0.0049	0.0206171	0.20961	0.10335	0.233599	0.350347	0.0058	0.0237988	0.430542	0.0009	0.00484136	0.285191	0.027	0.083514	0.425929	0.0012	0.00621755
MAC_00020	Uncharacterized protein	209.785	6.21859	182.063	14.8554	173.581	16.1866	205.377	10.4696	212.026	5.50107	206.918	10.8131	-0.204479	0.0926	0.215469	-0.273303	0.0258	0.0805228	-0.0306411	0.79915	0.891543	0.0153272	0.89695	0.94783	-0.019855	0.87015	0.932842	-0.0688239	0.569	0.73644	0.173838	0.15155	0.308326	0.219806	0.07055	0.175689	0.184624	0.1284	0.273788	0.242662	0.04525	0.12515	0.28863	0.01745	0.0587516	0.253448	0.03585	0.104479
MAC_00021	WD domain, G-beta repeat containing protein	34.864	0.111826	34.765	1.09782	33.7225	3.19984	35.8582	1.64746	39.4714	0.240046	35.2506	2.39676	-0.00410312	0.97615	0.987466	-0.0480281	0.70305	0.831679	0.0405653	0.7498	0.861576	0.179068	0.1546	0.312828	0.0159076	0.8982	0.94862	-0.043925	0.73015	0.849302	0.0446684	0.7257	0.846721	0.183171	0.142	0.294398	0.0200108	0.87095	0.933226	0.0885934	0.47875	0.664701	0.227096	0.06805	0.171	0.0639357	0.61205	0.768282
MAC_00022	Mitochondrial FOW-1 like protein	481.468	16.2332	480.257	27.5034	462.184	46.1965	394.013	15.795	397.178	16.9214	393.032	23.6729	-0.00363344	0.97885	0.988927	-0.0589745	0.6487	0.794633	-0.289199	0.02175	0.0701524	-0.277656	0.02925	0.0890808	-0.292793	0.0214	0.069228	-0.0553411	0.66815	0.808172	-0.285566	0.02405	0.0761497	-0.274023	0.0314	0.0941652	-0.28916	0.02385	0.0756126	-0.230224	0.07025	0.175135	-0.218682	0.086	0.203994	-0.233818	0.0676	0.170154
MAC_00023	Citrate synthase	686.241	66.2314	562.415	40.6928	485.132	39.52	564.735	16.2695	633.271	48.4948	623.564	28.7139	-0.28708	0.0542	0.14386	-0.500338	0.0007	0.00389376	-0.281141	0.0585	0.152473	-0.115893	0.4389	0.629633	-0.138177	0.35255	0.547976	-0.213258	0.13365	0.281872	0.00593891	0.9681	0.983801	0.171187	0.24135	0.426822	0.148903	0.3024	0.495554	0.219197	0.12245	0.264243	0.384445	0.0082	0.0316924	0.362161	0.01125	0.041119
MAC_00024	Putative NRD1 protein	51.9111	2.04727	44.2467	8.35628	47.2557	5.30499	70.1539	3.61392	63.2653	4.68878	60.7079	3.66198	-0.230474	0.0691	0.172974	-0.135555	0.2819	0.473023	0.434481	0.00075	0.00413583	0.285372	0.02165	0.0698842	0.225842	0.06965	0.173984	0.0949188	0.45765	0.646478	0.664955	5e-05	0.000362775	0.515846	5e-05	0.000362775	0.456316	0.0005	0.0029	0.570036	5e-05	0.000362775	0.420927	0.001	0.00530838	0.361397	0.0046	0.0195686
MAC_00025	Phosphoribosylaminoimidazole carboxylase	228.41	26.5708	171.752	25.4574	138.015	19.3397	170.368	5.94347	185.705	17.1515	206.463	22.7361	-0.411305	0.0012	0.00621755	-0.726801	5e-05	0.000362775	-0.422974	0.00075	0.00413583	-0.298617	0.0192	0.0634454	-0.145744	0.2586	0.446801	-0.315496	0.012	0.0432806	-0.011669	0.92665	0.96353	0.112687	0.37555	0.570416	0.265561	0.0381	0.109624	0.303827	0.01425	0.049833	0.428183	0.0005	0.0029	0.581057	5e-05	0.000362775
MAC_00026	Plasma membrane ATPase	1403.65	100.089	1248.72	33.7779	839.821	85.0917	966.995	28.369	940.604	56.903	1048.72	107.974	-0.16873	0.53015	0.706392	-0.74103	0.0044	0.0188498	-0.537604	0.0395	0.112704	-0.577525	0.02645	0.0821415	-0.420557	0.10405	0.234805	-0.572301	0.01635	0.0557327	-0.368875	0.131	0.277851	-0.408795	0.0872	0.206024	-0.251828	0.30955	0.503169	0.203426	0.3564	0.551528	0.163505	0.44675	0.636682	0.320473	0.1512	0.307815
MAC_00027	Putative myocyte-specific enhancer factor 2d	14.5298	1.59362	12.436	1.83568	14.3446	0.586028	16.6345	0.588018	18.2895	1.60904	15.421	2.23331	-0.224492	0.16595	0.329094	-0.0185028	0.90725	0.953476	0.195165	0.21325	0.392565	0.332002	0.0325	0.0967621	0.0858823	0.58905	0.75114	0.205989	0.20855	0.386405	0.419658	0.0104	0.0385604	0.556494	0.0008	0.00436954	0.310374	0.05485	0.145146	0.213668	0.1751	0.341653	0.350505	0.02255	0.0722031	0.104385	0.5138	0.693382
MAC_00028	Putative nucleoporin-interacting protein NIC96	57.3193	1.98759	53.5472	2.20263	52.7434	2.08891	55.1952	1.31471	56.2388	1.18325	54.2754	2.60481	-0.0982091	0.4288	0.620617	-0.120029	0.33355	0.528996	-0.0544787	0.661	0.803287	-0.0274552	0.82025	0.90406	-0.0787221	0.52385	0.701226	-0.0218201	0.85945	0.926905	0.0437303	0.7292	0.848688	0.0707539	0.575	0.740915	0.019487	0.8769	0.936697	0.0655504	0.602	0.760747	0.0925739	0.45495	0.644023	0.0413071	0.7384	0.854481
MAC_00029	Ribitol kinase	44.7424	8.187	82.9565	21.2159	40.6919	7.20464	18.7041	2.89144	12.3507	0.976024	11.1835	1.68477	0.890711	5e-05	0.000362775	-0.136901	0.2794	0.470229	-1.25829	5e-05	0.000362775	-1.85705	5e-05	0.000362775	-2.00028	5e-05	0.000362775	-1.02761	5e-05	0.000362775	-2.149	5e-05	0.000362775	-2.74776	5e-05	0.000362775	-2.89099	5e-05	0.000362775	-1.12139	5e-05	0.000362775	-1.72015	5e-05	0.000362775	-1.86338	5e-05	0.000362775
MAC_00030	Uncharacterized protein	52.7504	2.34546	50.9474	4.12242	45.163	0.490831	51.5001	1.72099	53.7379	0.612612	51.3949	2.86655	-0.0501748	0.681	0.816949	-0.22404	0.06645	0.168014	-0.034607	0.7748	0.876814	0.0267582	0.82615	0.907388	-0.0375579	0.75485	0.865014	-0.173865	0.1599	0.32057	0.0155678	0.90115	0.950292	0.0769329	0.5311	0.707165	0.0126169	0.91985	0.959952	0.189433	0.12285	0.264858	0.250798	0.03985	0.113481	0.186482	0.12765	0.272627
MAC_00031	SPX domain protein	71.3391	1.72013	72.1235	5.98102	64.2312	5.57673	59.1983	4.66838	56.9839	1.84892	61.2128	1.50119	0.0157763	0.89535	0.946912	-0.151419	0.20895	0.386956	-0.269137	0.02715	0.0838967	-0.324138	0.00805	0.0312329	-0.220859	0.0691	0.172974	-0.167195	0.1625	0.324351	-0.284913	0.0185	0.061587	-0.339914	0.0048	0.0202711	-0.236635	0.04985	0.134875	-0.117718	0.3381	0.533594	-0.172719	0.1552	0.313685	-0.0694401	0.56655	0.7344
MAC_00032	Glutamate synthase	28.3763	2.45067	15.1365	1.49554	12.7189	6.28152	9.10715	1.42972	19.1711	3.4771	20.4598	0.962555	-0.906657	5e-05	0.000362775	-1.15771	5e-05	0.000362775	-1.63961	5e-05	0.000362775	-0.565754	5e-05	0.000362775	-0.471892	0.0001	0.000686749	-0.251049	0.04985	0.134875	-0.732957	5e-05	0.000362775	0.340903	0.0054	0.0223998	0.434765	0.0004	0.00238366	-0.481908	0.00025	0.00157207	0.591952	5e-05	0.000362775	0.685815	5e-05	0.000362775
MAC_00033	Uncharacterized protein	41.8742	2.99027	37.0274	4.15279	31.1853	2.72614	36.0324	3.71053	37.8811	2.64196	39.9475	2.26186	-0.177467	0.22875	0.411665	-0.425194	0.00395	0.0172033	-0.216767	0.143	0.295786	-0.144583	0.3191	0.513461	-0.0679539	0.63915	0.787633	-0.247727	0.1027	0.232581	-0.0393	0.7888	0.885378	0.0328838	0.827	0.907865	0.109513	0.4545	0.643621	0.208427	0.17145	0.336659	0.280611	0.0643	0.163944	0.35724	0.0185	0.061587
MAC_00034	ER-golgi SNARE complex subunit Bet1, putative	104.199	10.2783	77.4852	6.1632	69.9437	1.57358	80.1887	4.47978	83.0638	1.98485	77.0669	7.61694	-0.427346	0.00265	0.0122799	-0.575072	0.0001	0.000686749	-0.377867	0.00805	0.0312329	-0.327047	0.0218	0.0702754	-0.435155	0.0032	0.0144079	-0.147726	0.3153	0.509243	0.0494785	0.73005	0.849265	0.100298	0.48865	0.672876	-0.00780944	0.95595	0.978301	0.197205	0.1813	0.350171	0.248025	0.09465	0.219002	0.139917	0.3407	0.536222
MAC_00035	Uncharacterized protein	755.769	54.504	614.686	96.4178	569.669	42.0246	768.85	41.0476	706.757	12.5311	713.997	41.6663	-0.298095	0.0147	0.0511036	-0.407821	0.00115	0.00599744	0.0247556	0.83605	0.913	-0.0967308	0.42185	0.614345	-0.0820283	0.50275	0.684505	-0.109726	0.36965	0.564611	0.322851	0.00745	0.0293182	0.201365	0.09435	0.218466	0.216067	0.07585	0.185516	0.432577	0.00045	0.00264476	0.311091	0.0089	0.0339351	0.325793	0.00635	0.0256696
MAC_00036	Uncharacterized protein	139.707	2.2326	145.024	12.0287	128.997	10.582	121.147	9.57611	123.5	4.97807	115.878	5.40256	0.0538831	0.67415	0.812192	-0.11507	0.37935	0.574009	-0.205643	0.11155	0.247009	-0.177893	0.1704	0.335311	-0.269796	0.0387	0.110983	-0.168953	0.1945	0.36804	-0.259526	0.04475	0.124073	-0.231776	0.07055	0.175689	-0.323679	0.0123	0.0441617	-0.090573	0.49105	0.674933	-0.0628236	0.63925	0.787694	-0.154726	0.2313	0.414868
MAC_00037	Nuc-1 negative regulatory protein preg	35.2822	3.66485	45.923	4.00071	24.2143	3.60652	21.8567	4.3265	22.9698	2.23219	24.1608	1.53003	0.380278	0.0056	0.02311	-0.543078	0.0001	0.000686749	-0.690863	5e-05	0.000362775	-0.619201	5e-05	0.000362775	-0.546271	5e-05	0.000362775	-0.923356	5e-05	0.000362775	-1.07114	5e-05	0.000362775	-0.999479	5e-05	0.000362775	-0.926549	5e-05	0.000362775	-0.147785	0.3259	0.52082	-0.0761225	0.6141	0.769737	-0.00319312	0.98135	0.99007
MAC_00038	Armadillo repeat protein	67.4181	3.29934	62.7736	2.18348	58.8608	3.21677	64.547	5.02595	66.3746	0.454563	62.7158	1.99565	-0.102977	0.3977	0.591823	-0.195827	0.1084	0.241972	-0.0627856	0.59905	0.758606	-0.0225046	0.8511	0.922031	-0.104308	0.38195	0.576576	-0.0928504	0.4474	0.637258	0.0401915	0.74125	0.856393	0.0804725	0.50405	0.685532	-0.00133058	0.9899	0.99419	0.133042	0.2721	0.462011	0.173323	0.15045	0.306694	0.0915198	0.4406	0.631061
MAC_00039	VeA protein	63.8911	7.50494	87.9287	18.9586	64.5249	2.67997	75.3181	5.4834	70.0928	1.26658	65.1955	5.72669	0.460718	0.00035	0.00212064	0.0142394	0.9084	0.954096	0.237381	0.0567	0.148832	0.133651	0.2796	0.47047	0.0291556	0.8146	0.900913	-0.446479	0.00025	0.00157207	-0.223337	0.07145	0.177352	-0.327067	0.0078	0.0304366	-0.431563	0.0007	0.00389376	0.223142	0.069	0.17279	0.119412	0.3275	0.522471	0.0149161	0.90785	0.953849
MAC_00040	Uncharacterized protein	13.7921	2.20015	21.6018	1.91114	31.4716	1.89864	35.0258	1.4361	24.1219	1.66705	28.9594	2.24951	0.647305	0.00015	0.000993023	1.1902	5e-05	0.000362775	1.34457	5e-05	0.000362775	0.806499	5e-05	0.000362775	1.07019	5e-05	0.000362775	0.542898	0.0004	0.00238366	0.697265	5e-05	0.000362775	0.159194	0.28005	0.470979	0.422882	0.00335	0.0149749	0.154366	0.26395	0.452863	-0.383704	0.00725	0.0286753	-0.120017	0.39655	0.590825
MAC_00041	Putative goliath E3 ubiquitin ligase	0.124781	0.216126	0.319601	0.277277	0.423632	0.407446	0.343799	0.298358	0	0	0.170689	0.295641	1.35688	1	1	1.76342	1	1	1.46217	1	1	#NAME?	1	1	0.451973	1	1	0.40654	1	1	0.105296	1	1	#NAME?	1	1	-0.904904	1	1	-0.301245	1	1	#NAME?	1	1	-1.31144	1	1
MAC_00042	Ankyrin repeat protein	36.4822	1.1125	32.8903	1.1946	25.8993	1.58464	29.5044	2.41966	32.6095	2.30303	33.8677	3.73526	-0.149528	0.21745	0.397924	-0.494279	5e-05	0.000362775	-0.306259	0.01135	0.0414018	-0.161899	0.1806	0.349241	-0.10728	0.37515	0.570136	-0.344751	0.0049	0.0206171	-0.156731	0.20525	0.382123	-0.012371	0.9196	0.959832	0.0422485	0.73505	0.852491	0.188019	0.1288	0.274391	0.33238	0.00635	0.0256696	0.386999	0.0015	0.00754603
MAC_00043	Na/H antiporter, putative	34.8563	2.5977	37.8613	2.18066	37.2874	3.4948	31.1754	5.60459	29.8922	3.35918	40.4827	2.32532	0.119305	0.3552	0.550376	0.0972673	0.4501	0.639683	-0.161013	0.2139	0.393407	-0.221649	0.08805	0.207587	0.215885	0.0871	0.205854	-0.0220377	0.8673	0.931223	-0.280318	0.03155	0.0945194	-0.340954	0.00875	0.0334699	0.0965799	0.4433	0.633499	-0.25828	0.04915	0.133416	-0.318916	0.015	0.0519607	0.118618	0.3475	0.542948
MAC_00044	RNase H domain protein	69.0662	5.50727	61.8702	6.30072	67.8458	4.01455	61.6883	3.38528	55.9759	3.51431	63.691	3.93036	-0.158737	0.20315	0.379514	-0.0257217	0.834	0.911929	-0.162984	0.19325	0.366365	-0.303176	0.01545	0.0532365	-0.116892	0.3462	0.541713	0.133015	0.283	0.47421	-0.00424762	0.97155	0.985614	-0.144439	0.25115	0.438194	0.0418449	0.73745	0.853898	-0.137262	0.27025	0.459911	-0.277454	0.02825	0.0866183	-0.09117	0.45695	0.645855
MAC_00045	tRNA-specific adenosine-34 deaminase subunit Tad3, putative	28.0993	3.16344	27.2108	2.57934	30.1058	4.50946	37.4515	1.28595	35.7053	1.0552	33.7668	2.4346	-0.0463533	0.74625	0.859576	0.0995064	0.4802	0.666008	0.414492	0.00225	0.0106898	0.345606	0.01335	0.0471949	0.265071	0.05565	0.14667	0.14586	0.304	0.497187	0.460845	0.0012	0.00621755	0.391959	0.00555	0.0229348	0.311424	0.0254	0.0795398	0.314986	0.0236	0.0749805	0.246099	0.07485	0.183666	0.165565	0.2278	0.410526
MAC_00046	Putative 6-phosphofructo-2-kinase	49.9502	0.813886	37.0866	10.6823	22.7525	2.73767	16.7597	2.03273	17.6494	1.0176	16.6372	2.31997	-0.429593	0.0007	0.00389376	-1.13446	5e-05	0.000362775	-1.5755	5e-05	0.000362775	-1.50087	5e-05	0.000362775	-1.58607	5e-05	0.000362775	-0.70487	5e-05	0.000362775	-1.1459	5e-05	0.000362775	-1.07128	5e-05	0.000362775	-1.15648	5e-05	0.000362775	-0.441034	0.0009	0.00484136	-0.366409	0.005	0.020974	-0.451611	0.00065	0.00364841
MAC_00047	U3 small nucleolar RNA associated protein	63.4036	3.33481	64.0925	13.5353	66.3068	9.26073	84.2227	3.91311	82.8449	4.25439	91.8519	11.5822	0.015591	0.89615	0.947419	0.0645908	0.60415	0.762403	0.409643	0.001	0.00530838	0.385848	0.00175	0.00861936	0.534744	5e-05	0.000362775	0.0489997	0.6994	0.829222	0.394052	0.00175	0.00861936	0.370257	0.0027	0.0124786	0.519153	5e-05	0.000362775	0.345053	0.0057	0.0234643	0.321257	0.00925	0.0350356	0.470153	0.0002	0.00128619
MAC_00048	RNA polymerase II subunit 3	134.646	5.18869	126.46	2.52823	120	10.8786	133.236	6.70281	129.483	7.13307	129.386	7.81863	-0.0904934	0.4527	0.642102	-0.16614	0.1713	0.336449	-0.0151846	0.8972	0.947974	-0.0564137	0.6416	0.789378	-0.0574904	0.6324	0.782881	-0.0756464	0.53695	0.711604	0.0753088	0.53195	0.707744	0.0340797	0.78005	0.880026	0.0330031	0.7829	0.881882	0.150955	0.21715	0.397533	0.109726	0.3666	0.561572	0.108649	0.3727	0.567695
MAC_00049	Putative dicarboxylate carrier protein	150.693	4.25156	152.994	10.9888	81.4336	10.182	95.7161	10.8493	90.2647	4.13303	103.103	10.6629	0.0218599	0.85485	0.924209	-0.887915	5e-05	0.000362775	-0.654778	5e-05	0.000362775	-0.739378	5e-05	0.000362775	-0.547525	5e-05	0.000362775	-0.909775	5e-05	0.000362775	-0.676638	5e-05	0.000362775	-0.761237	5e-05	0.000362775	-0.569385	5e-05	0.000362775	0.233137	0.0629	0.161276	0.148538	0.2381	0.422854	0.34039	0.0068	0.0271884
MAC_00050	Phenylalanyl-tRNA synthetase	106.052	5.11748	99.157	0.198236	69.1666	1.61727	69.8819	5.00955	82.4068	3.85954	81.8495	3.35588	-0.0969784	0.4227	0.615231	-0.616618	5e-05	0.000362775	-0.601775	5e-05	0.000362775	-0.36393	0.00325	0.0146008	-0.37372	0.0024	0.01129	-0.519639	5e-05	0.000362775	-0.504797	5e-05	0.000362775	-0.266951	0.03145	0.0942856	-0.276741	0.02735	0.0843911	0.0148426	0.90735	0.953525	0.252688	0.04185	0.117898	0.242898	0.05395	0.143356
MAC_00051	Calcipressin family protein	542.829	25.5916	247.857	23.0824	152.516	12.1744	121.271	45.8844	120.061	19.0739	132.974	13.4226	-1.13099	5e-05	0.000362775	-1.83154	5e-05	0.000362775	-2.16226	5e-05	0.000362775	-2.17673	5e-05	0.000362775	-2.02935	5e-05	0.000362775	-0.700553	5e-05	0.000362775	-1.03127	5e-05	0.000362775	-1.04574	5e-05	0.000362775	-0.898366	5e-05	0.000362775	-0.330722	0.00925	0.0350356	-0.345186	0.0064	0.0258432	-0.197813	0.111	0.246133
MAC_00052	Mitochondrion organization and biogenesis protein	118.704	9.39709	90.4821	15.2431	83.3822	10.6037	107.114	6.41492	114.427	2.32878	119.318	10.3873	-0.391666	0.00215	0.0102874	-0.509558	0.0001	0.000686749	-0.148226	0.2321	0.415818	-0.0529374	0.66995	0.80946	0.00743734	0.95135	0.975905	-0.117892	0.35465	0.549819	0.24344	0.0513	0.137895	0.338729	0.00565	0.0232885	0.399104	0.00165	0.008192	0.361332	0.00395	0.0172033	0.456621	0.0002	0.00128619	0.516996	0.0001	0.000686749
MAC_00053	Short-chain dehydrogenase/reductase family protein, putative	65.6208	3.74423	57.6102	5.05805	62.3232	2.15764	58.6487	7.88443	65.4387	2.50973	68.8938	1.1094	-0.187829	0.1486	0.303974	-0.0743831	0.5617	0.730938	-0.162055	0.21085	0.389426	-0.00400876	0.97615	0.987466	0.0702218	0.5799	0.744485	0.113446	0.3868	0.581387	0.0257742	0.843	0.917096	0.18382	0.1549	0.313256	0.258051	0.044	0.12249	-0.0876715	0.49935	0.681786	0.0703743	0.5846	0.747911	0.144605	0.25865	0.44685
MAC_00054	Trypsin delta/gamma	7.89469	0.996153	6.4609	1.67249	7.56571	1.54331	8.7571	0.83688	9.64387	2.47214	7.42969	1.38543	-0.289146	0.21375	0.393206	-0.0614056	0.77695	0.878185	0.14957	0.50035	0.682567	0.28873	0.184	0.353809	-0.0875799	0.6988	0.828795	0.227741	0.32775	0.522756	0.438717	0.0599	0.155267	0.577876	0.01265	0.0451513	0.201567	0.391	0.585648	0.210976	0.3414	0.53695	0.350135	0.1092	0.243255	-0.0261742	0.9035	0.951415
MAC_00057	HET domain-containing protein	2.75282	0.353891	3.25749	0.467179	2.706	0.696515	3.03543	0.469537	3.59764	0.652059	2.92753	0.301667	0.242849	0.2931	0.485356	-0.0247477	0.92455	0.96244	0.14099	0.5418	0.715525	0.38614	0.0918	0.214047	0.0887745	0.70285	0.831538	-0.267597	0.24515	0.431336	-0.101859	0.6517	0.796778	0.143291	0.5224	0.700196	-0.154074	0.5042	0.685594	0.165737	0.4772	0.663341	0.410888	0.07625	0.186293	0.113522	0.63185	0.782543
MAC_00058	1,3-beta-glucanosyltransferase	31.968	3.17981	44.1875	4.69061	37.1877	8.2779	27.2214	2.96237	20.1291	0.348526	19.8405	2.05787	0.467012	0.00055	0.00315471	0.2182	0.1043	0.235203	-0.231884	0.09535	0.220167	-0.667342	5e-05	0.000362775	-0.688182	5e-05	0.000362775	-0.248812	0.0579	0.151299	-0.698896	5e-05	0.000362775	-1.13435	5e-05	0.000362775	-1.15519	5e-05	0.000362775	-0.450083	0.0012	0.00621755	-0.885542	5e-05	0.000362775	-0.906381	5e-05	0.000362775
MAC_00059	MYB DNA binding protein (Tbf1), putative	17.4326	0.550742	18.4251	4.67873	13.0439	2.57214	19.3949	1.78548	17.5747	1.64218	18.7526	2.02871	0.079889	0.54445	0.71754	-0.418406	0.00165	0.008192	0.153895	0.24	0.425063	0.0117143	0.9265	0.963446	0.105302	0.41935	0.611901	-0.498295	0.0003	0.00184856	0.0740064	0.57715	0.742448	-0.0681747	0.60625	0.76393	0.0254128	0.84135	0.916134	0.572301	5e-05	0.000362775	0.43012	0.0015	0.00754603	0.523708	0.0001	0.000686749
MAC_00060	Uncharacterized protein	10.4612	0.261444	10.3641	1.57303	9.14508	1.50154	10.3278	0.544868	11.7125	0.761566	11.6791	0.703018	-0.0134436	0.94815	0.974413	-0.193975	0.36395	0.558944	-0.0185041	0.9372	0.969171	0.163005	0.4283	0.620182	0.158885	0.4452	0.635236	-0.180532	0.40185	0.595896	-0.00506047	0.983	0.990899	0.176448	0.3959	0.590217	0.172328	0.40895	0.602547	0.175471	0.4131	0.606136	0.35698	0.0938	0.217545	0.35286	0.09975	0.227653
MAC_00061	Putative fluconazole resistance protein (FLU1)	6.8639	1.23254	7.68701	1.89236	7.47876	1.40723	7.97339	1.36529	8.81047	0.906375	9.83654	0.353903	0.163393	0.3685	0.563477	0.12377	0.496	0.679074	0.216165	0.23085	0.414276	0.360189	0.04325	0.120933	0.519121	0.0039	0.0170189	-0.0396227	0.82845	0.908679	0.052772	0.7641	0.8705	0.196797	0.2634	0.452281	0.355729	0.04155	0.117241	0.0923947	0.59855	0.758258	0.236419	0.17885	0.346854	0.395351	0.02375	0.0753532
MAC_00062	Ankyrin repeat-containing protein, putative	1.6508	0.22298	1.89239	0.654077	1.47529	0.0255186	2.40813	0.504619	2.6044	0.120711	2.8677	0.631702	0.197049	0.4482	0.637974	-0.162165	0.54585	0.718692	0.54475	0.02985	0.0905182	0.657787	0.00935	0.0353423	0.79673	0.0016	0.00797782	-0.359214	0.17155	0.336781	0.3477	0.15475	0.313039	0.460738	0.0549	0.145241	0.599681	0.01405	0.0492554	0.706914	0.00795	0.0309201	0.819952	0.00205	0.00987573	0.958895	0.00025	0.00157207
MAC_00063	Uncharacterized protein	0.621146	0.299914	0.833802	0.364452	0.987152	0.532429	0.929472	0.367813	1.17733	0.275392	1.61407	0.13227	0.424773	1	1	0.668341	1	1	0.581481	1	1	0.922516	1	1	1.3777	0.0299	0.0906256	0.243568	1	1	0.156707	1	1	0.497743	1	1	0.952928	0.0346	0.101612	-0.0868606	1	1	0.254175	1	1	0.70936	0.0844	0.201173
MAC_00064	IBR domain containing protein	31.0465	4.11232	34.3923	2.53841	39.923	2.64715	40.9299	3.52203	37.8614	0.605923	35.951	1.17257	0.147655	0.3129	0.506853	0.362787	0.01205	0.0434358	0.398724	0.00575	0.0236357	0.286293	0.04895	0.132995	0.211598	0.1447	0.298246	0.215133	0.12825	0.273547	0.251069	0.07395	0.181985	0.138639	0.3309	0.526134	0.0639427	0.6542	0.798611	0.035936	0.79925	0.891607	-0.0764941	0.5845	0.74786	-0.15119	0.2896	0.481586
MAC_00065	Uncharacterized protein	0.0812572	0.140742	0.0848509	0.146966	0.154137	0.266973	0.320793	0.190875	0.0897531	0.155457	0.0724245	0.125443	0.0624347	1	1	0.923645	1	1	1.98108	1	1	0.143466	1	1	-0.166018	1	1	0.861211	1	1	1.91864	1	1	0.0810318	1	1	-0.228452	1	1	1.05743	1	1	-0.780179	1	1	-1.08966	1	1
MAC_00066	Uncharacterized protein	32.2917	3.37138	27.625	1.70017	22.0116	2.01262	22.9437	3.30254	30.8997	2.32503	32.8515	0.155811	-0.225188	0.1274	0.272196	-0.552902	0.0004	0.00238366	-0.493063	0.00115	0.00599744	-0.0635723	0.6643	0.805567	0.0247958	0.8639	0.92932	-0.327715	0.0342	0.100708	-0.267876	0.08555	0.203206	0.161615	0.2732	0.463139	0.249983	0.09475	0.219164	0.0598389	0.70865	0.8355	0.48933	0.00165	0.008192	0.577698	0.00015	0.000993023
MAC_00067	Pyridoxamine phosphate oxidase family protein	5.99176	0.652104	5.78733	1.03111	6.73789	1.46301	6.85702	1.6058	5.31701	0.536761	7.32168	0.373285	-0.0500809	0.8298	0.909415	0.169318	0.47955	0.665418	0.194603	0.41605	0.608942	-0.172365	0.48385	0.669028	0.289195	0.2274	0.410007	0.219399	0.362	0.556788	0.244684	0.3114	0.505153	-0.122284	0.6228	0.775805	0.339276	0.15575	0.314434	0.0252843	0.91925	0.959564	-0.341683	0.1567	0.315773	0.119877	0.60175	0.760586
MAC_00068	Putative transmembrane protein	4.88118	1.14602	5.61481	0.556005	6.25739	0.722522	6.02896	1.24312	6.60286	0.724288	8.07635	1.30374	0.20201	0.3476	0.543016	0.358331	0.0964	0.222011	0.304681	0.1605	0.321468	0.435862	0.0409	0.115759	0.726474	0.00105	0.00553695	0.156322	0.455	0.64405	0.102672	0.62645	0.778419	0.233852	0.2536	0.441114	0.524464	0.009	0.0342597	-0.05365	0.796	0.88984	0.0775304	0.70625	0.833749	0.368142	0.0658	0.166791
MAC_00069	Nonsense-mediated mRNA decay protein Upf3, putative	66.7127	3.23095	71.5596	5.2107	68.0114	3.4994	64.3634	4.19559	62.1902	2.63113	66.3234	4.55264	0.101182	0.40485	0.598775	0.0278142	0.8243	0.906396	-0.0517225	0.66995	0.80946	-0.101275	0.40875	0.602402	-0.00844505	0.9459	0.973524	-0.0733681	0.54895	0.721225	-0.152905	0.21245	0.391521	-0.202458	0.10045	0.228768	-0.109627	0.3724	0.567467	-0.0795367	0.5112	0.69117	-0.12909	0.2901	0.482082	-0.0362593	0.76415	0.870533
MAC_00070	Serine/threonine-protein phosphatase	81.0521	2.85006	79.5873	3.01264	70.6366	1.17857	68.5467	0.376029	63.4222	0.621226	64.4211	1.90315	-0.0263116	0.8296	0.909322	-0.198433	0.11325	0.249751	-0.241761	0.0552	0.145824	-0.353861	0.0049	0.0206171	-0.331315	0.00825	0.031849	-0.172122	0.17095	0.335979	-0.215449	0.0855	0.203138	-0.327549	0.0093	0.0351875	-0.305004	0.0145	0.0505241	-0.0433276	0.73125	0.850009	-0.155428	0.229	0.411925	-0.132882	0.3024	0.495554
MAC_00071	tRNA wybutosine-synthesizing protein 2	21.6609	1.84641	21.2202	2.03324	21.1762	2.1529	26.8036	2.83634	25.7119	1.64667	25.0582	0.562482	-0.0296542	0.84855	0.920559	-0.0326543	0.83265	0.911046	0.307332	0.0356	0.103903	0.247339	0.0945	0.21872	0.210186	0.1563	0.315237	-0.00300012	0.97895	0.988972	0.336986	0.02455	0.0774216	0.276993	0.0644	0.164121	0.23984	0.10975	0.24414	0.339986	0.02265	0.0724617	0.279994	0.06095	0.157434	0.24284	0.103	0.233032
MAC_00072	Secretory pathway protein Ssp120, putative	126.553	4.39505	112.866	9.48422	115.803	3.20547	139.46	2.85097	133.761	1.48797	124.906	3.72595	-0.165133	0.2033	0.379725	-0.12807	0.33165	0.526957	0.140105	0.2756	0.465964	0.0799126	0.53965	0.713867	-0.018905	0.8806	0.938748	0.0370623	0.77145	0.874821	0.305238	0.01885	0.0625197	0.245045	0.05785	0.15121	0.146228	0.26245	0.451316	0.268175	0.03775	0.108818	0.207983	0.10795	0.241261	0.109165	0.4018	0.595836
MAC_00073	Origin recognition complex subunit 6 (ORC6)	14.9456	1.33505	15.2919	0.639882	16.9652	2.03072	19.9865	0.274467	20.5369	2.39953	19.1872	2.35694	0.0330401	0.83555	0.912773	0.182852	0.2632	0.452081	0.419302	0.0101	0.037641	0.458494	0.00435	0.0186704	0.360418	0.0268	0.0830234	0.149811	0.35945	0.554394	0.386261	0.0182	0.0607965	0.425454	0.00805	0.0312329	0.327378	0.0446	0.123748	0.23645	0.1382	0.288655	0.275642	0.08295	0.1986	0.177566	0.26645	0.455594
MAC_00074	Extracellular dioxygenase, putative	10.2809	3.23724	9.44136	2.65789	9.42479	0.656463	15.4427	9.17916	6.69958	1.22647	9.13255	0.982357	-0.122905	0.52135	0.699324	-0.125439	0.5131	0.692753	0.586952	0.0019	0.00925559	-0.61783	0.0024	0.01129	-0.170882	0.36955	0.564514	-0.00253422	0.9862	0.992477	0.709857	0.0001	0.000686749	-0.494925	0.01675	0.0568269	-0.0479774	0.80645	0.895968	0.712391	0.0002	0.00128619	-0.492391	0.018	0.0602578	-0.0454431	0.81625	0.901712
MAC_00075	3-oxoacyl-(Acyl-carrier-protein) reductase	48.5153	4.51344	43.1871	6.50418	52.1262	3.64487	54.7735	5.93558	55.3445	3.53488	52.4432	4.31371	-0.167838	0.237	0.421616	0.10357	0.4511	0.640687	0.17504	0.204	0.380507	0.190002	0.16945	0.334007	0.112317	0.41105	0.604253	0.271408	0.05205	0.139444	0.342878	0.0146	0.0508127	0.35784	0.01045	0.0387066	0.280155	0.0448	0.124187	0.0714703	0.59775	0.757661	0.0864322	0.5223	0.700108	0.00874764	0.94805	0.974402
MAC_00076	F-box domain containing protein	0.0787417	0.0727662	0.0871114	0.0755614	0.326573	0.197717	0.629177	0.430127	0.226307	0.248823	0.247927	0.137259	0.145733	1	1	2.0522	1	1	2.99827	1	1	1.52308	1	1	1.65472	1	1	1.90647	1	1	2.85253	1	1	1.37735	1	1	1.50898	1	1	0.946062	1	1	-0.529123	1	1	-0.397488	1	1
MAC_00077	NAD dependent epimerase/dehydratase, putative	7.07032	1.27971	6.47949	1.56522	6.51838	1.05697	9.11993	1.25678	8.55864	1.81216	5.64861	0.555349	-0.125895	0.558	0.728126	-0.117261	0.58495	0.748197	0.367248	0.07065	0.175871	0.275606	0.1826	0.351939	-0.323878	0.1409	0.292756	0.00863419	0.9814	0.990083	0.493143	0.0184	0.0613148	0.401501	0.06015	0.155792	-0.197983	0.3797	0.574364	0.484509	0.02145	0.0693663	0.392867	0.06305	0.161574	-0.206617	0.3583	0.553272
MAC_00078	Uncharacterized protein	13.6158	2.01507	15.4634	1.02599	14.0773	2.13022	22.2194	11.3589	17.967	3.43009	14.6392	1.93606	0.183574	0.23865	0.423438	0.0480886	0.76395	0.870425	0.706536	5e-05	0.000362775	0.400069	0.01055	0.039005	0.104557	0.5045	0.685822	-0.135485	0.38885	0.583404	0.522962	0.0006	0.00340137	0.216495	0.1555	0.314097	-0.0790164	0.61265	0.76871	0.658448	0.0001	0.000686749	0.35198	0.0235	0.0747181	0.0564688	0.7162	0.840547
MAC_00079	Intermembrane space AAA protease IAP-1	180.864	6.57322	179.191	2.99878	138.208	7.11316	135.253	9.39249	145.335	2.71645	143.409	6.01187	-0.0134069	0.9176	0.958847	-0.388063	0.0024	0.01129	-0.419246	0.0012	0.00621755	-0.31552	0.0124	0.0444489	-0.334768	0.0084	0.0323248	-0.374656	0.00355	0.0157215	-0.405839	0.0014	0.00710529	-0.302113	0.0173	0.0583492	-0.321361	0.0111	0.0406735	-0.0311829	0.804	0.894364	0.0725433	0.5649	0.733262	0.0532949	0.66825	0.80823
MAC_00080	C2H2 finger domain protein, putative	35.3968	3.29662	65.7113	36.1741	174.908	37.3517	75.5054	23.1725	82.4255	8.23417	75.5506	4.088	0.892524	5e-05	0.000362775	2.3049	5e-05	0.000362775	1.09296	5e-05	0.000362775	1.21947	5e-05	0.000362775	1.09383	5e-05	0.000362775	1.41238	5e-05	0.000362775	0.200438	0.1313	0.278326	0.326948	0.01365	0.0480738	0.201301	0.1242	0.267033	-1.21194	5e-05	0.000362775	-1.08543	5e-05	0.000362775	-1.21108	5e-05	0.000362775
MAC_00081	Glycerophosphodiester phosphodiesterase GDE1	103.443	3.6315	95.1131	8.95875	102.979	9.76375	138.984	4.7614	129.118	5.04672	148.078	6.09955	-0.12112	0.3358	0.531163	-0.00648017	0.961	0.980751	0.426078	0.0012	0.00621755	0.319855	0.01195	0.0431415	0.517517	5e-05	0.000362775	0.11464	0.3703	0.565285	0.547199	5e-05	0.000362775	0.440975	0.0005	0.0029	0.638638	5e-05	0.000362775	0.432559	0.0011	0.00576616	0.326336	0.0119	0.042991	0.523998	5e-05	0.000362775
MAC_00082	Uncharacterized protein	95.4721	4.51803	99.9722	9.00979	83.6558	1.30811	81.6735	7.24116	85.6562	6.63403	82.2428	4.09365	0.0664475	0.5786	0.743445	-0.190613	0.1126	0.24871	-0.225211	0.06045	0.156412	-0.156522	0.19145	0.363906	-0.21519	0.0737	0.181528	-0.257061	0.0334	0.098848	-0.291659	0.0154	0.0530951	-0.222969	0.06205	0.159613	-0.281638	0.0205	0.0668974	-0.0345979	0.7758	0.877523	0.0340918	0.77935	0.879635	-0.0245767	0.8393	0.914895
MAC_00083	DUF866 domain protein	53.5674	1.12713	49.0412	0.229089	41.0363	5.50665	47.6858	1.86539	48.8638	2.22175	50.3529	2.76293	-0.127361	0.33935	0.534848	-0.384453	0.00525	0.0218665	-0.167795	0.2126	0.391745	-0.132588	0.32165	0.516269	-0.0892792	0.5044	0.685761	-0.257091	0.06145	0.158443	-0.0404334	0.75875	0.867359	-0.00522698	0.9705	0.985082	0.0380823	0.7747	0.876773	0.216658	0.1162	0.254435	0.251864	0.06705	0.16916	0.295173	0.03115	0.0935665
MAC_00084	Zinc finger protein zpr1	112.69	10.9141	86.1166	10.6933	70.4836	9.04414	60.9874	5.51689	53.788	3.7817	68.958	8.92325	-0.387995	0.00195	0.00946249	-0.676999	5e-05	0.000362775	-0.885776	5e-05	0.000362775	-1.067	5e-05	0.000362775	-0.708568	5e-05	0.000362775	-0.289003	0.0191	0.0631771	-0.49778	5e-05	0.000362775	-0.679007	5e-05	0.000362775	-0.320573	0.00925	0.0350356	-0.208777	0.0947	0.219077	-0.390003	0.0023	0.0108941	-0.0315695	0.7985	0.891274
MAC_00085	Uncharacterized protein	39.1852	1.1885	26.7042	1.65589	33.6763	1.05391	46.0593	1.07425	52.1434	1.30252	50.7428	3.5829	-0.553243	5e-05	0.000362775	-0.218575	0.0823	0.197423	0.233185	0.06	0.155487	0.412177	0.00095	0.00507718	0.372895	0.0023	0.0108941	0.334668	0.0092	0.034894	0.786427	5e-05	0.000362775	0.96542	5e-05	0.000362775	0.926138	5e-05	0.000362775	0.451759	0.0005	0.0029	0.630752	5e-05	0.000362775	0.59147	5e-05	0.000362775
MAC_00086	Uncharacterized protein	21.4121	4.03881	14.1443	0.417679	20.3273	5.5025	26.8059	1.93563	31.9805	3.68245	29.81	0.399979	-0.598209	0.0131	0.0464868	-0.0750068	0.74015	0.855702	0.324125	0.1295	0.27551	0.578765	0.00625	0.0253328	0.477371	0.02475	0.0779358	0.523202	0.0295	0.0896907	0.922334	5e-05	0.000362775	1.17697	5e-05	0.000362775	1.07558	5e-05	0.000362775	0.399131	0.068	0.17095	0.653772	0.0034	0.0151641	0.552378	0.01135	0.0414018
MAC_00087	Uncharacterized protein	28.8299	1.42671	32.0286	2.10823	28.5899	1.86233	33.1724	2.84589	34.1797	1.49453	31.8422	0.770918	0.151795	0.26295	0.451782	-0.0120619	0.9313	0.966048	0.202415	0.1401	0.291517	0.24557	0.07075	0.17606	0.143373	0.2917	0.483791	-0.163857	0.23535	0.419568	0.0506201	0.70275	0.831482	0.0937751	0.4801	0.665907	-0.00842183	0.95005	0.975359	0.214477	0.1202	0.26058	0.257632	0.0619	0.159333	0.155435	0.25715	0.445148
MAC_00088	Arrestin domain-containing protein	41.5278	0.654073	49.9696	4.94846	53.5959	4.01242	45.2585	1.88291	45.2462	3.62275	46.284	2.38843	0.266971	0.0432	0.120831	0.368043	0.00615	0.0249845	0.124109	0.34655	0.542015	0.123719	0.3519	0.547287	0.156433	0.2323	0.416032	0.101071	0.43365	0.624868	-0.142862	0.27055	0.460252	-0.143253	0.2727	0.462626	-0.110538	0.3944	0.588877	-0.243934	0.06275	0.160988	-0.244324	0.06315	0.161757	-0.21161	0.1044	0.235335
MAC_00089	Peptidyl-prolyl cis-trans isomerase	58.2057	2.01428	59.0421	19.3546	58.1272	4.54494	75.8647	0.807569	65.9631	6.66974	82.139	8.26357	0.0205843	0.8978	0.948366	-0.00194868	0.99205	0.995177	0.382268	0.0117	0.0423964	0.180499	0.23285	0.4167	0.496906	0.00075	0.00413583	-0.022533	0.88785	0.94281	0.361684	0.0185	0.061587	0.159914	0.30055	0.493516	0.476322	0.00205	0.00987573	0.384217	0.0124	0.0444489	0.182447	0.23245	0.416217	0.498855	0.00125	0.00644361
MAC_00090	Heat shock transcription factor Hsf1, putative	12.7942	1.23903	13.6605	0.671441	15.1773	2.08982	15.9789	1.46082	14.3404	1.79022	14.3473	1.15535	0.094522	0.5193	0.697717	0.246428	0.09095	0.212539	0.320682	0.0292	0.0889677	0.164599	0.2602	0.44868	0.165294	0.2521	0.439278	0.151906	0.29325	0.485521	0.22616	0.1116	0.247085	0.0700772	0.629	0.780365	0.070772	0.6193	0.773342	0.074254	0.5991	0.758646	-0.0818291	0.57115	0.738064	-0.0811343	0.56605	0.734134
MAC_00091	Peptidyl-prolyl isomerase CWC27	39.3573	2.1832	39.0395	5.53846	33.8997	1.08046	39.5468	2.14732	39.921	2.19174	40.8395	1.62538	-0.011698	0.92715	0.9638	-0.215359	0.0984	0.225333	0.00693105	0.95795	0.979228	0.0205156	0.8688	0.932061	0.0533324	0.6792	0.815678	-0.203661	0.11465	0.251986	0.018629	0.88215	0.939724	0.0322136	0.799	0.891448	0.0650304	0.61355	0.769319	0.22229	0.08605	0.204055	0.235874	0.0687	0.172209	0.268691	0.0401	0.114013
MAC_00092	Uncharacterized protein	38.8146	1.78664	39.9852	2.6821	41.2422	1.58806	39.0448	2.53357	43.2234	1.5453	46.3913	1.0668	0.0428649	0.7447	0.858578	0.0875191	0.5018	0.683705	0.00853103	0.94895	0.974769	0.155211	0.23015	0.413348	0.257253	0.04605	0.126897	0.0446542	0.7315	0.850173	-0.0343339	0.7928	0.888002	0.112346	0.3862	0.58073	0.214388	0.09405	0.217991	-0.078988	0.54075	0.714639	0.0676915	0.60355	0.761971	0.169734	0.1881	0.359438
MAC_00093	Uncharacterized protein	17.6892	3.37829	19.2161	3.50998	26.7452	5.88793	22.1628	2.89967	23.8395	1.72709	25.8878	0.998695	0.119444	0.4773	0.66345	0.596409	0.0004	0.00238366	0.325268	0.0501	0.135436	0.430484	0.00945	0.0356434	0.549402	0.0008	0.00436954	0.476965	0.0032	0.0144079	0.205824	0.2091	0.387148	0.31104	0.05445	0.144354	0.429958	0.0074	0.0291602	-0.271141	0.08945	0.209961	-0.165925	0.28665	0.478342	-0.0470069	0.7553	0.865259
MAC_00094	Aldehyde dehydrogenase	1179.1	229.346	980.622	87.0633	1282.05	180.607	1266.49	155.919	789.867	95.8676	1305.4	170.831	-0.265914	0.13915	0.290084	0.120775	0.52385	0.701226	0.103148	0.5945	0.755242	-0.578002	0.00205	0.00987573	0.146808	0.44205	0.632315	0.386688	0.0335	0.0990874	0.369062	0.044	0.12249	-0.312088	0.06135	0.158247	0.412722	0.0267	0.0827671	-0.0176266	0.92495	0.962583	-0.698777	5e-05	0.000362775	0.0260336	0.8914	0.944758
MAC_00095	Putative negative acting factor	22.4774	3.88295	39.5193	11.2633	39.3701	8.99122	23.5331	1.99558	31.0046	2.16526	26.9583	2.50166	0.814082	5e-05	0.000362775	0.808625	5e-05	0.000362775	0.0662193	0.6562	0.799899	0.464009	0.0016	0.00797782	0.262255	0.07845	0.190386	-0.00545701	0.96825	0.983921	-0.747863	5e-05	0.000362775	-0.350073	0.0139	0.0488079	-0.551827	5e-05	0.000362775	-0.742406	5e-05	0.000362775	-0.344616	0.0146	0.0508127	-0.54637	5e-05	0.000362775
MAC_00096	Uncharacterized protein	67.8928	5.53074	79.9448	4.61882	68.1063	3.89973	72.9583	15.3036	80.1083	7.69846	69.0349	15.2093	0.235746	0.204	0.380507	0.00452983	0.98665	0.992617	0.103814	0.5836	0.747185	0.238694	0.2059	0.382955	0.024068	0.89865	0.948902	-0.231216	0.21615	0.396274	-0.131932	0.47925	0.665173	0.00294834	0.98785	0.993109	-0.211678	0.25525	0.442901	0.0992838	0.5986	0.758314	0.234164	0.209	0.38702	0.0195382	0.916	0.958044
MAC_00097	Protein transport protein SEC24	97.9009	3.23275	88.9453	2.85802	85.0627	2.75458	82.1184	3.41129	82.0934	2.514	80.2507	5.88936	-0.138404	0.26025	0.448742	-0.202796	0.0965	0.222175	-0.253618	0.0389	0.111408	-0.254056	0.0373	0.107828	-0.286808	0.0194	0.0639603	-0.0643927	0.59855	0.758258	-0.115214	0.34755	0.542978	-0.115653	0.3428	0.538478	-0.148404	0.2243	0.40626	-0.0508216	0.67625	0.813698	-0.05126	0.66675	0.807271	-0.0840118	0.48865	0.672876
MAC_00098	Mitogen-activated protein kinase	209.258	13.8149	179.005	18.7942	251.237	22.5783	198.075	13.5634	192.98	17.3905	211.766	11.8412	-0.225282	0.06445	0.164208	0.26377	0.0297	0.0901578	-0.0792345	0.51125	0.691185	-0.116831	0.33385	0.529243	0.0171884	0.88985	0.943911	0.489052	5e-05	0.000362775	0.146047	0.2244	0.40637	0.108451	0.3683	0.563296	0.24247	0.04695	0.128761	-0.343004	0.00475	0.0200933	-0.380601	0.0019	0.00925559	-0.246581	0.04215	0.118563
MAC_00099	Oxidation resistance protein 1	67.0552	7.08643	78.4113	3.51992	76.5427	5.4902	66.3631	3.25801	57.0186	3.14658	60.6579	2.56694	0.225713	0.08455	0.201403	0.190916	0.14805	0.303168	-0.0149673	0.9108	0.955343	-0.233917	0.08445	0.201231	-0.144652	0.285	0.476483	-0.0347966	0.79345	0.888274	-0.24068	0.06535	0.165941	-0.45963	0.00065	0.00364841	-0.370365	0.00595	0.0243157	-0.205884	0.11275	0.248949	-0.424833	0.00125	0.00644361	-0.335569	0.01245	0.0445806
MAC_00100	Uroporphyrinogen-III synthase	95.1784	8.08377	117.764	0.808214	103.938	3.75901	68.3563	4.47098	59.4982	2.35097	54.0249	0.801181	0.307194	0.0132	0.0467669	0.127013	0.3023	0.495448	-0.477561	0.00035	0.00212064	-0.677789	5e-05	0.000362775	-0.817009	5e-05	0.000362775	-0.180181	0.14245	0.29506	-0.784755	5e-05	0.000362775	-0.984983	5e-05	0.000362775	-1.1242	5e-05	0.000362775	-0.604574	5e-05	0.000362775	-0.804802	5e-05	0.000362775	-0.944022	5e-05	0.000362775
MAC_00101	Sulfhydryl oxidase	243.236	20.687	308.062	2.50788	191.078	18.0768	114.981	6.88636	104.9	10.9171	100.843	14.708	0.340864	0.0055	0.0227569	-0.348196	0.0049	0.0206171	-1.08096	5e-05	0.000362775	-1.21334	5e-05	0.000362775	-1.27025	5e-05	0.000362775	-0.68906	5e-05	0.000362775	-1.42182	5e-05	0.000362775	-1.5542	5e-05	0.000362775	-1.61111	5e-05	0.000362775	-0.732759	5e-05	0.000362775	-0.865141	5e-05	0.000362775	-0.922051	5e-05	0.000362775
MAC_00102	Putative pyruvate decarboxylase	768.982	156.388	1018.22	467.969	389.63	134.761	121.189	3.98908	137.957	28.3425	109.963	27.8635	0.405026	0.0364	0.105787	-0.980846	5e-05	0.000362775	-2.6657	5e-05	0.000362775	-2.47873	5e-05	0.000362775	-2.80594	5e-05	0.000362775	-1.38587	5e-05	0.000362775	-3.07072	5e-05	0.000362775	-2.88375	5e-05	0.000362775	-3.21096	5e-05	0.000362775	-1.68485	5e-05	0.000362775	-1.49788	5e-05	0.000362775	-1.82509	5e-05	0.000362775
MAC_00103	THUMP domain containing protein	50.0752	5.55843	37.8367	7.35861	38.7802	1.38967	54.2471	4.47386	55.2315	9.76754	52.9907	7.51521	-0.40431	0.01735	0.0584751	-0.368777	0.0306	0.0922194	0.115449	0.4737	0.660542	0.141394	0.37555	0.570416	0.0816424	0.61365	0.769414	0.0355328	0.8377	0.913991	0.519759	0.0021	0.0100834	0.545704	0.001	0.00530838	0.485953	0.0041	0.0177504	0.484227	0.00445	0.0190365	0.510171	0.00235	0.0110921	0.45042	0.0077	0.0301135
MAC_00104	Uncharacterized protein	19.8678	0.701257	20.6314	3.72614	21.0285	1.40374	23.1494	2.6532	24.8817	1.1025	24.9196	1.5864	0.0544048	0.7139	0.839059	0.0819085	0.57875	0.743569	0.220541	0.1327	0.280438	0.324648	0.02685	0.0831431	0.326848	0.0262	0.0815096	0.0275037	0.85285	0.922858	0.166136	0.25905	0.447261	0.270243	0.06275	0.160988	0.272443	0.06225	0.160005	0.138632	0.34215	0.537783	0.242739	0.0925	0.215321	0.24494	0.092	0.214389
MAC_00105	Regulatory factor Sgt1	36.8074	2.23394	32.5485	3.9056	35.0798	1.51728	38.818	1.08965	41.8194	2.49674	42.4957	1.75164	-0.177403	0.16845	0.332652	-0.0693554	0.5887	0.75091	0.0767317	0.55075	0.722628	0.184178	0.14695	0.30161	0.207321	0.1044	0.235335	0.108048	0.4	0.594045	0.254135	0.04655	0.127935	0.361581	0.0039	0.0170189	0.384724	0.0019	0.00925559	0.146087	0.25075	0.437809	0.253533	0.04575	0.126241	0.276676	0.02985	0.0905182
MAC_00106	DNA repair protein Rad18, putative	37.1972	3.12305	32.3941	2.05289	52.9343	2.52591	51.4028	3.60161	53.5021	0.955989	46.6109	2.81522	-0.199462	0.1055	0.237123	0.509011	0.0001	0.000686749	0.466656	0.0002	0.00128619	0.524403	0.0001	0.000686749	0.325474	0.0081	0.0313897	0.708473	5e-05	0.000362775	0.666118	5e-05	0.000362775	0.723865	5e-05	0.000362775	0.524936	5e-05	0.000362775	-0.0423558	0.7194	0.842761	0.0153915	0.8963	0.947498	-0.183538	0.12805	0.273229
MAC_00107	Ubiquinone biosynthesis protein COQ9	208.511	6.78675	175.084	16.5564	161.417	15.7287	205.415	15.6262	215.799	14.6944	206.882	14.138	-0.252076	0.0393	0.112274	-0.369327	0.00265	0.0122799	-0.0215815	0.8578	0.925942	0.0495701	0.6802	0.816446	-0.0113164	0.9245	0.96242	-0.117252	0.33695	0.532312	0.230494	0.05945	0.154364	0.301646	0.01245	0.0445806	0.240759	0.0508	0.136876	0.347746	0.005	0.020974	0.418898	0.00045	0.00264476	0.358011	0.00415	0.0179363
MAC_00108	RNP domain protein	732.284	4.76982	657.051	31.5784	629.977	17.7117	688.134	26.6886	683.346	35.2743	687.735	8.09197	-0.156399	0.2769	0.467425	-0.217104	0.1315	0.27866	-0.089715	0.54185	0.715576	-0.0997881	0.4989	0.681433	-0.090551	0.5354	0.710405	-0.0607056	0.6705	0.809802	0.0666839	0.6431	0.790528	0.0566109	0.69595	0.827015	0.0658479	0.64765	0.79387	0.127389	0.3775	0.572351	0.117316	0.4189	0.611538	0.126553	0.37835	0.573102
MAC_00109	Signal recognition particle 14kD protein, putative	268.156	25.5238	252.725	9.11585	254.465	8.26315	269.478	24.4959	241.829	14.2752	292.88	9.7508	-0.085501	0.51085	0.690915	-0.075604	0.55625	0.726726	0.00709377	0.95535	0.97796	-0.149085	0.2477	0.434275	0.127238	0.319	0.513366	0.00989698	0.93845	0.969755	0.0925947	0.4714	0.658493	-0.0635842	0.6243	0.776857	0.212739	0.0937	0.217374	0.0826978	0.52035	0.69854	-0.0734811	0.57205	0.738652	0.202842	0.1096	0.243924
MAC_00110	MIF4G domain containing protein	22.7408	0.428273	27.6979	5.98078	28.9891	1.74015	36.9787	4.58158	35.4637	1.57821	36.1069	2.30641	0.284493	0.02845	0.087122	0.350226	0.00635	0.0256696	0.70141	5e-05	0.000362775	0.641056	5e-05	0.000362775	0.666989	5e-05	0.000362775	0.0657334	0.60495	0.762995	0.416917	0.00085	0.00460684	0.356563	0.0045	0.0192068	0.382496	0.00215	0.0102874	0.351184	0.0056	0.02311	0.29083	0.02015	0.0659767	0.316763	0.01055	0.039005
MAC_00111	Dihydrolipoyl dehydrogenase	876.079	4.42045	814.823	63.9436	680.189	31.7722	608.047	40.2301	635.436	25.2386	643.585	18.5313	-0.104575	0.52455	0.701861	-0.365125	0.02145	0.0693663	-0.526878	0.00075	0.00413583	-0.463314	0.00345	0.0153442	-0.44493	0.0054	0.0223998	-0.26055	0.10105	0.22979	-0.422303	0.00675	0.0270224	-0.358739	0.02415	0.0764157	-0.340355	0.0308	0.0927301	-0.161753	0.2847	0.476167	-0.0981894	0.52355	0.701028	-0.0798055	0.60485	0.762938
MAC_00112	Uncharacterized protein	87.9111	4.64142	71.7904	6.20966	70.8034	1.05173	78.0216	5.42925	74.8593	2.60648	76.6537	3.52364	-0.292255	0.0157	0.0539515	-0.312227	0.0096	0.0361107	-0.172172	0.1502	0.30635	-0.231865	0.0544	0.144253	-0.19769	0.10345	0.233761	-0.0199713	0.8748	0.935535	0.120083	0.31755	0.511787	0.0603906	0.61665	0.771411	0.094565	0.43705	0.628051	0.140055	0.24375	0.429754	0.0803619	0.50845	0.688957	0.114536	0.34495	0.540532
MAC_00113	DNA repair and recombination protein RAD54	18.2153	1.86425	17.4513	1.41345	19.1158	0.648401	18.8904	2.0354	18.8539	1.2031	17.0763	1.97212	-0.0618171	0.7125	0.838118	0.0696143	0.67315	0.811459	0.0525026	0.7535	0.864088	0.0497121	0.7643	0.870584	-0.0931548	0.5791	0.743842	0.131431	0.43085	0.622455	0.11432	0.501	0.682997	0.111529	0.5077	0.688285	-0.0313377	0.85375	0.923431	-0.0171117	0.9163	0.958196	-0.0199022	0.9028	0.951069	-0.162769	0.3367	0.532053
MAC_00114	Uncharacterized protein	35.8436	1.23378	41.7873	5.35948	34.0652	0.978035	36.1388	2.40141	39.3555	2.37113	36.497	2.15023	0.221348	0.12285	0.264858	-0.0734144	0.60795	0.765127	0.0118341	0.9346	0.967777	0.134849	0.35	0.545471	0.026061	0.8549	0.924209	-0.294763	0.03905	0.11174	-0.209514	0.14005	0.291443	-0.0864995	0.5469	0.71961	-0.195287	0.17665	0.34382	0.0852486	0.55235	0.723857	0.208263	0.14965	0.305504	0.0994754	0.49285	0.676511
MAC_00115	DnaJ and TPR domain protein	156.555	5.52101	171.34	22.7419	120.687	5.33392	119.153	1.54891	138.179	11.7175	119.062	10.1101	0.130199	0.2892	0.4811	-0.375401	0.00205	0.00987573	-0.393852	0.00125	0.00644361	-0.18013	0.1376	0.287696	-0.394956	0.00125	0.00644361	-0.505599	0.0001	0.000686749	-0.524051	5e-05	0.000362775	-0.310329	0.0118	0.0427028	-0.525154	5e-05	0.000362775	-0.0184512	0.87715	0.936852	0.19527	0.10605	0.238093	-0.0195548	0.8678	0.931511
MAC_00116	Mitoferrin-1	198.707	7.05462	171.566	16.4438	134.271	15.3368	166.537	16.8135	174.314	9.57358	174.914	5.8386	-0.211876	0.0812	0.195485	-0.565489	5e-05	0.000362775	-0.254799	0.03855	0.110637	-0.188955	0.1204	0.260868	-0.183992	0.13155	0.278728	-0.353613	0.00395	0.0172033	-0.0429232	0.72665	0.847274	0.0229214	0.85125	0.922089	0.0278844	0.8142	0.900751	0.31069	0.0109	0.0400835	0.376534	0.0018	0.00883347	0.381497	0.00145	0.0073241
MAC_00117	Autophagy-related protein 9	40.5384	1.99222	42.3298	4.88273	41.4401	2.14527	45.1567	3.9653	47.4065	1.81172	50.3511	4.78771	0.0623848	0.64225	0.789842	0.0317363	0.81705	0.902203	0.155649	0.2379	0.422619	0.225794	0.08835	0.208121	0.312733	0.01885	0.0625197	-0.0306485	0.81985	0.903811	0.0932647	0.47735	0.663475	0.163409	0.2135	0.392868	0.250349	0.0598	0.155053	0.123913	0.34495	0.540532	0.194058	0.1396	0.290788	0.280997	0.03265	0.0971111
MAC_00118	Golgi transport complex subunit Cog6, putative	37.9947	1.55238	34.1877	0.801714	37.4971	1.24643	40.853	0.929201	44.0365	1.08946	38.3324	3.30866	-0.152321	0.23135	0.414934	-0.0190218	0.8762	0.936335	0.104644	0.40415	0.598124	0.2129	0.08865	0.208626	0.0127663	0.918	0.959055	0.133299	0.29705	0.48976	0.256965	0.0428	0.119984	0.365221	0.0033	0.0147896	0.165087	0.19185	0.364477	0.123666	0.3241	0.518909	0.231922	0.06025	0.155999	0.0317881	0.80175	0.893091
MAC_00119	AAA family ATPase	81.6161	6.81131	69.9683	5.42026	41.9899	0.865774	39.4662	3.03767	38.4618	1.68109	42.6967	1.48303	-0.222152	0.0672	0.169418	-0.958811	5e-05	0.000362775	-1.04824	5e-05	0.000362775	-1.08543	5e-05	0.000362775	-0.934729	5e-05	0.000362775	-0.736659	5e-05	0.000362775	-0.826085	5e-05	0.000362775	-0.863274	5e-05	0.000362775	-0.712576	5e-05	0.000362775	-0.0894254	0.46635	0.654097	-0.126614	0.30295	0.496154	0.0240827	0.84725	0.919766
MAC_00120	Nucleolar essential protein 1	142.241	9.63413	145.305	14.5942	142.469	18.4368	155.808	26.4102	150.964	5.8611	163.899	14.0613	0.0307539	0.80205	0.893273	0.00230989	0.98605	0.992398	0.131437	0.28495	0.476432	0.0858735	0.48265	0.668066	0.204474	0.0957	0.220783	-0.028444	0.81235	0.899664	0.100683	0.4107	0.60396	0.0551196	0.6502	0.795617	0.17372	0.1583	0.318183	0.129127	0.29555	0.488024	0.0835636	0.49	0.674019	0.202164	0.1017	0.230956
MAC_00121	Cystathionine gamma-synthase	42.201	4.36592	46.7822	4.57096	40.4379	1.25556	42.4967	4.83461	39.1822	2.48478	41.5216	2.89466	0.14868	0.23425	0.418357	-0.0615694	0.6231	0.776024	0.0100716	0.9365	0.968785	-0.107079	0.39445	0.588909	-0.0234184	0.8497	0.921156	-0.21025	0.09415	0.218133	-0.138609	0.2639	0.452814	-0.255759	0.04365	0.121767	-0.172099	0.1693	0.33378	0.071641	0.5735	0.739841	-0.0455096	0.72105	0.843939	0.038151	0.76015	0.868241
MAC_00122	RING-14 protein	106.691	6.48363	90.3162	2.13629	96.6068	3.81716	113.734	11.1254	97.4003	2.96936	112.393	4.71503	-0.240378	0.0568	0.149048	-0.143238	0.2526	0.439848	0.0922333	0.45545	0.644489	-0.131437	0.29525	0.487774	0.0751161	0.55075	0.722628	0.0971402	0.4422	0.632464	0.332611	0.00715	0.028342	0.108941	0.39385	0.588373	0.315494	0.012	0.0432806	0.235471	0.05975	0.154965	0.0118012	0.9245	0.96242	0.218354	0.0833	0.1992
MAC_00123	Meiotically up-regulated protein	32.3999	1.78625	30.4053	1.073	23.1353	0.53958	26.7956	3.67309	25.9493	2.24328	30.3688	0.719413	-0.0916641	0.48985	0.673902	-0.485891	0.00055	0.00315471	-0.273989	0.0402	0.114211	-0.320294	0.0179	0.0599956	-0.0933963	0.47835	0.664383	-0.394226	0.0041	0.0177504	-0.182325	0.1741	0.340278	-0.22863	0.09015	0.211197	-0.00173218	0.98795	0.993146	0.211901	0.12385	0.266487	0.165597	0.2288	0.411714	0.392494	0.0048	0.0202711
MAC_00124	Cysteine protease	44.937	4.16381	45.1537	7.14742	38.3724	2.65066	28.5298	2.27367	30.7969	3.9016	29.9206	1.2782	0.00693948	0.9588	0.979695	-0.227835	0.12365	0.266186	-0.655434	5e-05	0.000362775	-0.545119	0.00015	0.000993023	-0.586763	5e-05	0.000362775	-0.234775	0.1118	0.247404	-0.662373	5e-05	0.000362775	-0.552058	0.0001	0.000686749	-0.593702	5e-05	0.000362775	-0.427599	0.00575	0.0236357	-0.317284	0.04095	0.115874	-0.358928	0.0231	0.0736665
MAC_00125	Uncharacterized protein	53.1637	1.78518	53.7181	2.63369	41.3599	2.21244	43.2197	2.31307	43.4373	0.953895	43.1616	0.283566	0.0149668	0.9031	0.951227	-0.36221	0.00415	0.0179363	-0.298752	0.01695	0.0573834	-0.291507	0.01915	0.0633054	-0.300693	0.0164	0.0558649	-0.377177	0.00245	0.0114878	-0.313719	0.01165	0.0422559	-0.306474	0.01255	0.0448612	-0.31566	0.01105	0.0405309	0.0634577	0.60905	0.766062	0.0707026	0.57115	0.738064	0.0615169	0.62235	0.775555
MAC_00126	Histone H2B	5991.31	210.516	4620.72	75.3934	4637.43	382.819	5979.65	347.417	6526.84	258.662	5902.23	272.95	-0.374753	0.02975	0.0902875	-0.369543	0.0327	0.0972203	-0.00281024	0.9865	0.992578	0.123515	0.48925	0.673419	-0.0216093	0.90135	0.950366	0.00520938	0.97415	0.986589	0.371943	0.0312	0.0936828	0.498268	0.0051	0.0213209	0.353144	0.04285	0.120087	0.366733	0.03425	0.100815	0.493058	0.00595	0.0243157	0.347934	0.04635	0.127526
MAC_00127	Histone H2A	9808.49	376.931	7502.21	539.9	7382.45	489.422	9688.91	550.609	10991.2	247.586	9260.31	350.745	-0.386714	0.0624	0.160305	-0.409931	0.04955	0.134244	-0.0176971	0.9352	0.968133	0.164249	0.461	0.649301	-0.08297	0.6977	0.828193	-0.0232166	0.9041	0.951773	0.369017	0.0738	0.181727	0.550963	0.0122	0.0438596	0.303744	0.1367	0.286363	0.392234	0.056	0.147377	0.57418	0.0088	0.0336301	0.326961	0.10835	0.241903
MAC_00128	NADH dehydrogenase 1 beta subcomplex subunit 9	367.624	22.0629	326.353	3.91681	307.268	20.2955	325.135	12.8122	298.404	4.29084	328.525	16.2038	-0.1718	0.19155	0.364035	-0.258733	0.05295	0.141268	-0.177195	0.17435	0.34066	-0.300963	0.0241	0.0762866	-0.162228	0.2135	0.392868	-0.0869338	0.50785	0.688436	-0.00539527	0.966	0.982847	-0.129164	0.33015	0.525291	0.00957159	0.9405	0.970732	0.0815386	0.5371	0.711705	-0.0422298	0.756	0.86571	0.0965054	0.4679	0.655325
MAC_00129	Dihydrolipoamide succinyltransferase, putative	626.823	24.9181	505.636	14.5509	469.219	37.0293	538.172	22.8708	552.475	12.8338	560.735	14.8955	-0.30996	0.02745	0.0846408	-0.417796	0.0037	0.0162849	-0.219991	0.11925	0.259135	-0.182149	0.1953	0.36916	-0.160739	0.25505	0.442677	-0.107836	0.43045	0.62213	0.0899693	0.50995	0.69023	0.127811	0.35275	0.548177	0.149221	0.28	0.470933	0.197805	0.14775	0.302728	0.235647	0.08585	0.203732	0.257057	0.061	0.157537
MAC_00130	Uncharacterized protein	49.713	3.09759	40.4605	3.4098	29.697	2.03758	25.0604	2.60787	22.7288	1.40126	23.7436	0.170295	-0.297111	0.0164	0.0558649	-0.743306	5e-05	0.000362775	-0.988215	5e-05	0.000362775	-1.1291	5e-05	0.000362775	-1.06609	5e-05	0.000362775	-0.446195	0.00065	0.00364841	-0.691104	5e-05	0.000362775	-0.83199	5e-05	0.000362775	-0.768976	5e-05	0.000362775	-0.244909	0.06215	0.159804	-0.385795	0.0039	0.0170189	-0.322781	0.01485	0.0515329
MAC_00131	Transmembrane protein UsgS	27.4219	1.57716	33.7787	5.42165	32.4393	3.36248	28.0084	0.565956	28.7746	2.02159	29.1128	1.00243	0.300787	0.042	0.118224	0.242415	0.0989	0.226199	0.0305312	0.8358	0.912871	0.0694711	0.6359	0.785456	0.0863289	0.56055	0.730083	-0.0583725	0.681	0.816949	-0.270256	0.0599	0.155267	-0.231316	0.10995	0.24448	-0.214458	0.138	0.288324	-0.211883	0.14535	0.299264	-0.172943	0.23215	0.41586	-0.156086	0.28375	0.475089
MAC_00132	OTU-like cysteine protease, putative	17.1372	1.58422	16.3787	0.843845	17.7502	2.58899	20.6997	1.00589	21.1259	1.09375	18.3882	2.14706	-0.0653102	0.6969	0.827717	0.0506995	0.7606	0.868532	0.272474	0.09015	0.211197	0.301878	0.06145	0.158443	0.101643	0.5376	0.712102	0.11601	0.485	0.669978	0.337784	0.03635	0.105679	0.367188	0.0227	0.0725993	0.166954	0.3083	0.501786	0.221775	0.1661	0.32935	0.251178	0.1174	0.256269	0.0509439	0.75375	0.864295
MAC_00133	RSC complex subunit RSC1	86.2685	1.70135	79.3146	1.87499	86.8228	4.01125	85.5262	2.43675	90.1132	2.84943	83.3298	3.58586	-0.121247	0.31635	0.510409	0.00924119	0.93845	0.969755	-0.0124673	0.91815	0.959107	0.0629042	0.60385	0.76221	-0.0500012	0.6797	0.816058	0.130488	0.2788	0.469524	0.10878	0.3661	0.561048	0.184151	0.13035	0.276807	0.0712458	0.55815	0.72823	-0.0217084	0.85705	0.925504	0.053663	0.65565	0.79955	-0.0592424	0.62275	0.775782
MAC_00134	Mitochondrial carrier protein	8.31937	0.583398	6.80507	1.68633	9.57625	1.23136	8.7028	1.28372	7.02625	1.78496	10.3789	2.47967	-0.289863	0.18245	0.351709	0.202986	0.3188	0.513177	0.0650056	0.75695	0.866288	-0.243718	0.2567	0.44458	0.319109	0.1169	0.2555	0.49285	0.0214	0.069228	0.354869	0.1026	0.232423	0.0461449	0.8348	0.912387	0.608972	0.0045	0.0192068	-0.137981	0.49785	0.680581	-0.446705	0.03695	0.107035	0.116122	0.5619	0.731129
MAC_00135	Metallo-beta-lactamase domain protein, putative	39.2518	2.80673	31.2371	3.975	37.794	6.19357	43.7266	3.27691	30.2791	0.902781	38.3981	3.19944	-0.3295	0.0257	0.0802913	-0.0546012	0.71155	0.837451	0.155752	0.27605	0.466477	-0.374436	0.0141	0.0494042	-0.0317249	0.82485	0.906657	0.274899	0.0662	0.167549	0.485251	0.00115	0.00599744	-0.0449367	0.76885	0.873329	0.297775	0.0433	0.121043	0.210353	0.14305	0.29586	-0.319835	0.0351	0.102789	0.0228763	0.8769	0.936697
MAC_00136	Integral membrane protein	28.4014	6.64896	28.085	0.811288	21.3832	10.5823	16.9399	5.95875	19.1155	1.97293	19.4349	0.67522	-0.0161616	0.90505	0.952234	-0.409484	0.00435	0.0186704	-0.745538	5e-05	0.000362775	-0.571221	0.0001	0.000686749	-0.547313	5e-05	0.000362775	-0.393323	0.00595	0.0243157	-0.729376	5e-05	0.000362775	-0.555059	0.00015	0.000993023	-0.531151	5e-05	0.000362775	-0.336053	0.02625	0.0816304	-0.161736	0.27605	0.466477	-0.137829	0.3472	0.542643
MAC_00137	Recombinational repair protein	12.236	0.340457	12.8775	0.652602	17.5165	0.494242	19.0586	0.919798	21.6823	1.56153	16.9121	1.46322	0.0737182	0.6056	0.763436	0.517578	0.00015	0.000993023	0.639309	5e-05	0.000362775	0.825383	5e-05	0.000362775	0.466923	0.00105	0.00553695	0.443859	0.00185	0.00904247	0.565591	0.0001	0.000686749	0.751665	5e-05	0.000362775	0.393205	0.00595	0.0243157	0.121732	0.36235	0.557133	0.307805	0.023	0.073404	-0.0506549	0.703	0.83166
MAC_00138	Ankyrin repeat protein	0	0	0	0	0	0	0.0939207	0.162675	0	0	0	0	0	1	1	0	1	1	inf	1	1	0	1	1	0	1	1	0	1	1	inf	1	1	0	1	1	0	1	1	inf	1	1	0	1	1	0	1	1
MAC_00139	Histidine acid phosphatase, putative	0.374796	0.296786	0.381969	0.188836	0.234796	0.119751	0.616164	0.050363	0.861816	0.452446	1.35304	0.995156	0.0273486	1	1	-0.6747	1	1	0.717209	1	1	1.20127	1	1	1.85203	0.0132	0.0467669	-0.702048	1	1	0.689861	1	1	1.17393	1	1	1.82468	0.02185	0.0703946	1.39191	1	1	1.87597	1	1	2.52673	0.03955	0.112818
MAC_00140	Carboxylic ester hydrolase	29.6335	5.42987	21.2139	3.82642	19.3706	2.95544	24.7994	4.52796	30.2251	7.29235	28.6481	8.90191	-0.482217	0.00045	0.00264476	-0.613359	5e-05	0.000362775	-0.256925	0.05995	0.155374	0.0285198	0.83415	0.911981	-0.0487899	0.72165	0.844252	-0.131142	0.36125	0.556136	0.225292	0.1079	0.241184	0.510737	0.00025	0.00157207	0.433427	0.00175	0.00861936	0.356434	0.01225	0.0440088	0.641879	5e-05	0.000362775	0.564569	5e-05	0.000362775
MAC_00141	Uncharacterized protein	0.121795	0.0154582	0.0377975	0.0385429	0.214373	0.0745185	0.157592	0.0146931	0.109632	0.0740251	0.170027	0.0913468	-1.68809	1	1	0.815664	1	1	0.371732	1	1	-0.151793	1	1	0.481302	1	1	2.50376	1	1	2.05983	1	1	1.5363	1	1	2.1694	1	1	-0.443932	1	1	-0.967457	1	1	-0.334362	1	1
MAC_00142	Uncharacterized protein	0.0562857	0.0499165	0.270645	0.137348	0.358504	0.107809	0.0781517	0.0705866	0.206827	0.0950982	0.253583	0.0499073	2.26556	1	1	2.67115	1	1	0.473508	1	1	1.87758	1	1	2.17162	1	1	0.405588	1	1	-1.79205	1	1	-0.387978	1	1	-0.0939453	1	1	-2.19764	1	1	-0.793566	1	1	-0.499533	1	1
MAC_00145	Uncharacterized protein	0	0	0	0	0.134306	0.232625	0	0	0	0	0	0	0	1	1	inf	1	1	0	1	1	0	1	1	0	1	1	inf	1	1	0	1	1	0	1	1	0	1	1	#NAME?	1	1	#NAME?	1	1	#NAME?	1	1
MAC_00146	Short-chain dehydrogenase, putative	0.162384	0.150058	0.0668522	0.115792	0.107305	0.185857	0.0460002	0.0796749	0.180767	0.198679	0.124389	0.108915	-1.28036	1	1	-0.597695	1	1	-1.8197	1	1	0.154723	1	1	-0.384544	1	1	0.682666	1	1	-0.539336	1	1	1.43508	1	1	0.895817	1	1	-1.222	1	1	0.752418	1	1	0.213151	1	1
MAC_00147	Uncharacterized protein	61.5258	3.68374	52.5196	2.85645	97.7307	1.1628	109.443	3.39497	81.8939	2.76698	90.2561	3.12745	-0.228335	0.07005	0.174737	0.667622	5e-05	0.000362775	0.830916	5e-05	0.000362775	0.412566	0.00085	0.00460684	0.552834	5e-05	0.000362775	0.895957	5e-05	0.000362775	1.05925	5e-05	0.000362775	0.640901	5e-05	0.000362775	0.781169	5e-05	0.000362775	0.163295	0.17765	0.345227	-0.255056	0.03925	0.112181	-0.114788	0.3487	0.544126
MAC_00148	Uncharacterized protein	0.493095	0.245537	0.997668	0.447644	0.997922	0.656919	1.53044	0.288178	1.5382	0.101742	1.49733	0.744574	1.01669	1	1	1.01706	1	1	1.63401	0.1224	0.264162	1.64131	0.1225	0.264332	1.60245	0.1251	0.268495	0.000367678	1	1	0.617317	0.22355	0.405356	0.624616	0.2213	0.402572	0.585756	0.2748	0.46499	0.61695	0.2914	0.483468	0.624248	0.293	0.485262	0.585389	0.3412	0.536744
MAC_00149	Uncharacterized protein	53.6832	2.73069	46.7961	1.29474	47.5963	6.26352	55.0514	5.66881	53.7468	4.15678	55.3574	0.967797	-0.198084	0.14865	0.304021	-0.173623	0.21165	0.390463	0.0363075	0.79265	0.88793	0.00170642	0.98625	0.992503	0.0443052	0.7491	0.861257	0.0244615	0.8602	0.927384	0.234392	0.09255	0.215385	0.199791	0.15335	0.311016	0.24239	0.0855	0.203138	0.20993	0.12965	0.275735	0.175329	0.2065	0.383773	0.217928	0.1187	0.258269
MAC_00150	Pol protein	14.3831	2.65351	12.5621	2.61919	12.4522	0.958317	11.1313	1.75872	10.7267	1.17473	11.2958	1.72413	-0.19529	0.3421	0.537725	-0.20797	0.3147	0.508656	-0.369752	0.08155	0.196112	-0.423169	0.0447	0.123962	-0.348582	0.0999	0.227891	-0.0126803	0.94845	0.974577	-0.174462	0.4204	0.612836	-0.227879	0.2969	0.48959	-0.153292	0.47995	0.665773	-0.161782	0.45215	0.641651	-0.215199	0.32265	0.51732	-0.140612	0.51635	0.695353
MAC_00151	Uncharacterized protein	0	0	0.101852	0.0890968	0	0	0	0	0	0	0.0873014	0.15121	inf	1	1	0	1	1	0	1	1	0	1	1	inf	1	1	#NAME?	1	1	#NAME?	1	1	#NAME?	1	1	-0.222397	1	1	0	1	1	0	1	1	inf	1	1
MAC_00152	Uncharacterized protein	4.85643	0.333562	5.03932	0.955078	7.49152	2.77661	7.05699	0.55104	6.03304	0.241306	6.5602	0.441507	0.0533328	0.7971	0.890574	0.625361	0.00225	0.0106898	0.539154	0.0087	0.0333083	0.312988	0.1305	0.277069	0.433842	0.03195	0.0954695	0.572028	0.00595	0.0243157	0.485822	0.01795	0.060126	0.259656	0.21025	0.388652	0.38051	0.06315	0.161757	-0.0862063	0.6552	0.799291	-0.312372	0.1163	0.254587	-0.191518	0.32485	0.519736
MAC_00153	Uncharacterized protein	0.228281	0.0974807	0.196736	0.100065	0.0902556	0.0782599	0.208082	0.212336	0.260657	0.235759	0.263029	0.200258	-0.214553	1	1	-1.33872	1	1	-0.13366	1	1	0.191342	1	1	0.204409	1	1	-1.12417	1	1	0.0808926	1	1	0.405895	1	1	0.418962	1	1	1.20506	1	1	1.53006	1	1	1.54313	1	1
MAC_00154	Uncharacterized protein	8.16786	1.03769	6.22841	0.865769	7.93911	0.764693	12.2408	2.80792	11.2298	1.62899	8.98872	0.397149	-0.391095	0.0468	0.128438	-0.0409819	0.8251	0.906747	0.583662	0.0017	0.00840203	0.459306	0.01295	0.0460516	0.138156	0.45595	0.644984	0.350113	0.074	0.182079	0.974756	5e-05	0.000362775	0.8504	5e-05	0.000362775	0.529251	0.00735	0.0289962	0.624644	0.00115	0.00599744	0.500288	0.0074	0.0291602	0.179138	0.3411	0.536641
MAC_00155	Hsp70 family chaperone, putative	19.0869	3.63896	14.1755	1.51413	12.6606	1.47144	18.2155	0.917911	18.6859	2.06068	18.9198	1.39953	-0.429187	0.004	0.0173919	-0.592236	0.0001	0.000686749	-0.0674195	0.63845	0.787199	-0.0306323	0.83025	0.909667	-0.0126856	0.9285	0.964559	-0.163049	0.2834	0.474643	0.361767	0.015	0.0519607	0.398554	0.00665	0.0266847	0.416501	0.0045	0.0192068	0.524816	0.0007	0.00389376	0.561603	0.0001	0.000686749	0.57955	0.0001	0.000686749
MAC_00156	Uncharacterized protein	0.916156	0.885597	0.511513	0.444391	0.370643	0.32708	0.691461	0.269841	0.720436	0.316166	0.333718	0.162415	-0.840822	1	1	-1.30556	1	1	-0.405946	1	1	-0.346724	1	1	-1.45696	1	1	-0.464741	1	1	0.434876	1	1	0.494098	1	1	-0.616143	1	1	0.899618	1	1	0.95884	1	1	-0.151401	1	1
MAC_00158	Esterase/lipase	0.10796	0.0946352	0.200803	0.0700221	0.0879693	0.0765922	0.0354229	0.0613544	0.104747	0.0908868	0.0438047	0.0758719	0.895278	1	1	-0.29543	1	1	-1.60775	1	1	-0.0435957	1	1	-1.30135	1	1	-1.19071	1	1	-2.50302	1	1	-0.938873	1	1	-2.19662	1	1	-1.31232	1	1	0.251835	1	1	-1.00591	1	1
MAC_00159	Uncharacterized protein	3.92002	0.444335	2.83162	0.865718	3.10428	1.25622	4.99916	1.65324	7.30525	0.908485	5.41978	1.11479	-0.469234	0.10125	0.230148	-0.336605	0.232	0.415699	0.350824	0.17575	0.342583	0.898072	0.00055	0.00315471	0.467372	0.06805	0.171	0.132629	0.6514	0.796576	0.820058	0.0047	0.0199211	1.36731	5e-05	0.000362775	0.936606	0.0011	0.00576616	0.687429	0.0142	0.0497	1.23468	5e-05	0.000362775	0.803976	0.0037	0.0162849
MAC_00160	Cell wall glycosyl hydrolase YteR, putative	2.01387	0.19004	1.30667	0.38284	2.11755	0.56343	3.31974	0.344674	3.66944	0.336812	2.98747	0.113906	-0.624073	0.07465	0.183291	0.0724238	0.8105	0.898455	0.7211	0.01385	0.048657	0.865592	0.00335	0.0149749	0.568957	0.05355	0.142548	0.696497	0.04535	0.125365	1.34517	0.00015	0.000993023	1.48966	5e-05	0.000362775	1.19303	0.00085	0.00460684	0.648676	0.02325	0.0740462	0.793168	0.00655	0.026342	0.496533	0.0842	0.2008
MAC_00161	Integral membrane protein	6.18765	2.30268	6.31332	2.26195	7.46685	0.216311	12.1696	0.237912	10.0423	0.783938	11.8444	1.49872	0.0290088	0.9007	0.950034	0.271108	0.2066	0.383907	0.975817	5e-05	0.000362775	0.698629	0.00135	0.00688777	0.936746	5e-05	0.000362775	0.2421	0.2608	0.449404	0.946808	5e-05	0.000362775	0.66962	0.00195	0.00946249	0.907737	0.00015	0.000993023	0.704709	0.00045	0.00264476	0.42752	0.0343	0.100921	0.665637	0.0011	0.00576616
MAC_00163	Adenosylhomocysteinase	0	0	0.0889261	0.154024	0	0	0.0939207	0.162675	0	0	0	0	inf	1	1	0	1	1	inf	1	1	0	1	1	0	1	1	#NAME?	1	1	0.0788371	1	1	#NAME?	1	1	#NAME?	1	1	inf	1	1	0	1	1	0	1	1
MAC_00164	Uncharacterized protein	30.2664	2.31902	31.6881	3.64917	51.3284	1.5234	57.5797	3.58553	41.0956	1.51014	45.917	2.12653	0.0662263	0.61235	0.768527	0.762042	5e-05	0.000362775	0.927846	5e-05	0.000362775	0.441269	0.0006	0.00340137	0.601312	5e-05	0.000362775	0.695816	5e-05	0.000362775	0.861619	5e-05	0.000362775	0.375043	0.0037	0.0162849	0.535086	5e-05	0.000362775	0.165804	0.17275	0.33849	-0.320773	0.00985	0.0368694	-0.160729	0.1904	0.362531
MAC_00165	Kinase domain containing protein	10.3979	2.27117	10.1508	1.07558	12.6669	0.743796	17.0718	0.815374	18.1386	1.92927	15.6452	2.26887	-0.0347044	0.85965	0.927008	0.284763	0.14585	0.30002	0.715322	0.0001	0.000686749	0.802769	0.0001	0.000686749	0.589423	0.00175	0.00861936	0.319467	0.10335	0.233599	0.750026	0.00015	0.000993023	0.837474	0.0001	0.000686749	0.624128	0.0017	0.00840203	0.430559	0.02065	0.0672987	0.518007	0.0051	0.0213209	0.304661	0.1021	0.231598
MAC_00166	Uncharacterized protein	1.81563	0.257496	1.43673	0.666897	2.3378	0.81292	3.43116	0.275925	2.83277	1.60448	2.35214	0.804606	-0.337682	0.689	0.822455	0.364678	0.6653	0.806214	0.918225	0.2635	0.452371	0.641742	0.39455	0.588995	0.373505	0.66115	0.803359	0.70236	0.3505	0.545949	1.25591	0.0934	0.216896	0.979424	0.1675	0.331307	0.711187	0.3436	0.539197	0.553547	0.422	0.614485	0.277064	0.6697	0.809292	0.00882705	0.92955	0.964973
MAC_00167	Extracellular dioxygenase, putative	0	0	0	0	0.0456627	0.0790901	0	0	0	0	0	0	0	1	1	inf	1	1	0	1	1	0	1	1	0	1	1	inf	1	1	0	1	1	0	1	1	0	1	1	#NAME?	1	1	#NAME?	1	1	#NAME?	1	1
MAC_00168	N-alkane-inducible cytochrome P450	13.2514	1.47261	13.4723	0.531603	17.1343	1.5554	13.5298	2.51517	15.7252	0.90579	11.9881	1.59582	0.0238533	0.8807	0.938814	0.370742	0.0151	0.0522388	0.0299994	0.84935	0.921066	0.246934	0.1115	0.246934	-0.144539	0.36935	0.564312	0.346889	0.02385	0.0756126	0.00614601	0.97225	0.985877	0.223081	0.1463	0.300658	-0.168393	0.29505	0.487534	-0.340743	0.02735	0.0843911	-0.123808	0.4046	0.598519	-0.515281	0.00155	0.00776179
MAC_00169	ATP-dependent RNA helicase MSS116	78.1198	4.05676	82.6433	4.92873	63.6426	4.49536	58.9626	3.4509	52.2794	4.44171	52.1337	3.06916	0.0812085	0.5067	0.687656	-0.295697	0.0154	0.0530951	-0.405888	0.001	0.00530838	-0.579446	5e-05	0.000362775	-0.583472	5e-05	0.000362775	-0.376905	0.0023	0.0108941	-0.487097	5e-05	0.000362775	-0.660654	5e-05	0.000362775	-0.66468	5e-05	0.000362775	-0.110191	0.36965	0.564611	-0.283749	0.0226	0.0723278	-0.287775	0.0188	0.0623987
MAC_00170	Mitochondrial import inner membrane translocase subunit TIM17	315.956	11.8417	270.63	16.7312	204.045	23.8407	284.557	38.6602	262.133	30.2687	275.61	22.6524	-0.2234	0.06945	0.173617	-0.630836	5e-05	0.000362775	-0.151002	0.2198	0.400716	-0.269421	0.0285	0.0872515	-0.197092	0.10905	0.24303	-0.407436	0.0018	0.00883347	0.0723984	0.55445	0.725357	-0.0460209	0.70485	0.832835	0.0263081	0.82745	0.908143	0.479835	0.00015	0.000993023	0.361415	0.0047	0.0199211	0.433744	0.0006	0.00340137
MAC_00171	Acetylcholinesterase	0.509689	0.218732	0.493335	0.120313	0.573796	0.468626	1.0058	0.115897	0.733497	0.0740809	0.423765	0.168163	-0.0470495	1	1	0.170922	1	1	0.980653	1	1	0.525173	1	1	-0.266352	1	1	0.217971	1	1	1.0277	1	1	0.572223	1	1	-0.219303	1	1	0.809731	1	1	0.354252	1	1	-0.437274	1	1
MAC_00173	Brix domain-containing protein 2	327.136	13.9179	260.74	34.5984	251.559	41.2293	366.682	31.5722	341.013	20.134	392.14	43.2076	-0.327282	0.00765	0.0299612	-0.378994	0.00225	0.0106898	0.164636	0.18535	0.355663	0.0599361	0.6255	0.777744	0.261475	0.0338	0.0998111	-0.0517122	0.669	0.808713	0.491919	0.0001	0.000686749	0.387218	0.0013	0.00666464	0.588758	5e-05	0.000362775	0.543631	5e-05	0.000362775	0.43893	0.00045	0.00264476	0.64047	5e-05	0.000362775
MAC_00174	NADP-dependent alcohol dehydrogenase	0.148935	0.0940955	0.265526	0.176449	0.165967	0.0582592	0.112257	0.109548	0.128962	0.114891	0.380942	0.238439	0.83417	1	1	0.156211	1	1	-0.407875	1	1	-0.207733	1	1	1.35489	1	1	-0.677959	1	1	-1.24205	1	1	-1.0419	1	1	0.520718	1	1	-0.564086	1	1	-0.363944	1	1	1.19868	1	1
MAC_00175	Glucose dehydrogenase, putative	22.8103	1.69585	38.9846	22.5372	52.7807	13.2348	28.1021	4.95969	20.3914	2.96048	28.8197	2.23715	0.773216	5e-05	0.000362775	1.21032	5e-05	0.000362775	0.300992	0.02475	0.0779358	-0.161726	0.2415	0.426966	0.337367	0.0105	0.038856	0.437108	0.0005	0.0029	-0.472224	0.0005	0.0029	-0.934942	5e-05	0.000362775	-0.435849	0.001	0.00530838	-0.909332	5e-05	0.000362775	-1.37205	5e-05	0.000362775	-0.872958	5e-05	0.000362775
MAC_00176	DUF895 domain membrane protein	145.219	21.3817	249.375	101.477	454.803	102.715	136.952	7.19031	151.573	26.2296	191.662	13.3913	0.780088	5e-05	0.000362775	1.64701	5e-05	0.000362775	-0.0845517	0.48585	0.670675	0.061791	0.6144	0.769943	0.400336	0.00105	0.00553695	0.866926	5e-05	0.000362775	-0.86464	5e-05	0.000362775	-0.718297	5e-05	0.000362775	-0.379752	0.0042	0.0181209	-1.73157	5e-05	0.000362775	-1.58522	5e-05	0.000362775	-1.24668	5e-05	0.000362775
MAC_00177	Polyketide synthase	0.0743946	0.0562452	0.0534872	0.0287474	0.110116	0.0415384	0.0887782	0.071446	0.0978738	0.0458709	0.0737426	0.0599485	-0.476004	1	1	0.565754	1	1	0.255007	1	1	0.395723	1	1	-0.0127012	1	1	1.04176	1	1	0.731011	1	1	0.871727	1	1	0.463303	1	1	-0.310747	1	1	-0.170031	1	1	-0.578456	1	1
MAC_00179	O-methyltransferase, putative	0.0276511	0.0478931	0.195075	0.254431	0.165967	0.0582592	0.0257626	0.0446221	0.152396	0.132233	0.0956436	0.16566	2.81862	1	1	2.58549	1	1	-0.102061	1	1	2.46241	1	1	1.79033	1	1	-0.233131	1	1	-2.92068	1	1	-0.356205	1	1	-1.02829	1	1	-2.68755	1	1	-0.123074	1	1	-0.795154	1	1
MAC_00180	FAD dependent oxidoreductase family protein	0	0	0	0	0.0318067	0.0550909	0	0	0	0	0.0357243	0.0618764	0	1	1	inf	1	1	0	1	1	0	1	1	inf	1	1	inf	1	1	0	1	1	0	1	1	inf	1	1	#NAME?	1	1	#NAME?	1	1	0.167573	1	1
MAC_00181	Uncharacterized protein	0.385067	0.304901	0.452958	0.208306	1.25951	0.567555	0.869384	0.441471	0.715141	0.535451	0.880892	0.23878	0.234268	1	1	1.70969	0.01835	0.0611924	1.17488	1	1	0.893117	1	1	1.19385	1	1	1.47542	0.07685	0.187465	0.940615	1	1	0.65885	1	1	0.959587	1	1	-0.534802	0.3434	0.539067	-0.816568	0.19795	0.372703	-0.515831	0.35925	0.554188
MAC_00182	Cytochrome P450, putative	0.0408841	0.0708132	0.139761	0.0485521	0.0575369	0.099657	0.0970451	0.0204755	0.174786	0.143211	0	0	1.77334	1	1	0.492947	1	1	1.24711	1	1	2.09598	1	1	#NAME?	1	1	-1.2804	1	1	-0.52623	1	1	0.322634	1	1	#NAME?	1	1	0.754167	1	1	1.60303	1	1	#NAME?	1	1
MAC_00185	Nucleoside-diphosphate-sugar epimerase family protein	3.4314	0.973001	2.5619	0.529634	2.4962	0.424915	3.447	0.789089	3.00605	0.801814	4.74108	1.1535	-0.421584	0.1712	0.3363	-0.459062	0.1377	0.287818	0.0065417	0.9658	0.98274	-0.190929	0.51825	0.696863	0.466417	0.089	0.209224	-0.0374773	0.88895	0.943455	0.428126	0.15665	0.315703	0.230655	0.4565	0.645447	0.888001	0.00365	0.0161019	0.465603	0.13225	0.279744	0.268133	0.3937	0.588241	0.925479	0.0029	0.013262
MAC_00186	C6 transcription factor, putative	1.33016	0.418567	0.735768	0.202249	1.09622	0.360184	2.20426	1.5518	1.74744	0.463836	3.31057	0.850672	-0.854278	0.00745	0.0293182	-0.279068	0.31525	0.509188	0.728695	0.0056	0.02311	0.393644	0.12415	0.266971	1.31548	5e-05	0.000362775	0.57521	1	1	1.58297	5e-05	0.000362775	1.24792	0.00035	0.00212064	2.16976	5e-05	0.000362775	1.00776	0.00045	0.00264476	0.672712	0.01535	0.0529462	1.59455	5e-05	0.000362775
MAC_00187	Maleylacetate reductase, putative	1.91684	0.432755	1.72692	0.0271531	1.37288	0.628989	2.01114	1.32521	1.71117	0.522908	2.64226	0.782237	-0.150527	0.6332	0.783521	-0.481519	0.14935	0.305037	0.0692865	0.8231	0.905733	-0.163747	0.6072	0.764632	0.463044	0.11635	0.254661	-0.330991	0.32905	0.524117	0.219814	0.48545	0.670398	-0.0132191	0.9599	0.980159	0.613572	0.0415	0.117124	0.550805	0.1022	0.231765	0.317772	0.34675	0.542198	0.944563	0.00535	0.022219
MAC_00188	Benzoate 4-monooxygenase cytochrome P450, putative	0	0	0.0678924	0.0588842	0.0312599	0.0541437	0.034194	0.0592257	0	0	0.0329717	0.0571087	inf	1	1	inf	1	1	inf	1	1	0	1	1	inf	1	1	-1.11894	1	1	-0.989507	1	1	#NAME?	1	1	-1.04202	1	1	0.129431	1	1	#NAME?	1	1	0.0769171	1	1
MAC_00189	Monooxygenase, putative	0	0	0	0	0	0	0.0304654	0.0527676	0	0	0	0	0	1	1	0	1	1	inf	1	1	0	1	1	0	1	1	0	1	1	inf	1	1	0	1	1	0	1	1	inf	1	1	0	1	1	0	1	1
MAC_00190	GNAT family acetyltransferase, putative	2.10167	0.307319	1.06367	0.489831	1.88606	0.21701	1.84102	0.239257	1.62606	0.167669	0.968832	0.669815	-0.982488	0.0558	0.14696	-0.15616	0.66895	0.808713	-0.191026	0.60305	0.761602	-0.370157	0.3298	0.524935	-1.11722	0.0331	0.0981492	0.826328	0.09615	0.221558	0.791461	0.10735	0.240235	0.61233	0.2175	0.397969	-0.134728	1	1	-0.0348669	0.9485	0.974604	-0.213998	0.58815	0.750477	-0.961056	0.0594	0.154263
MAC_00191	p-loop containing Nucleoside Triphosphate Hydrolase	19.0001	2.20063	18.7241	4.65689	17.0714	3.04992	14.7474	2.16251	20.1379	1.52082	14.8434	1.82178	-0.0211121	0.9096	0.954736	-0.154423	0.38	0.574734	-0.365546	0.0417	0.117576	0.0839046	0.62215	0.775477	-0.356187	0.0452	0.125045	-0.133311	0.44315	0.633343	-0.344434	0.0583	0.152118	0.105017	0.5372	0.711769	-0.335074	0.06305	0.161574	-0.211123	0.24365	0.429632	0.238328	0.17065	0.33567	-0.201763	0.2649	0.453848
MAC_00192	Interferon-induced GTP-binding protein Mx2	0.0670861	0.0775908	0.0665519	0.00548847	0.0782469	0.093071	0.0737899	0.0666842	0.133913	0.130777	0.117135	0.148171	-0.0115358	1	1	0.22202	1	1	0.137408	1	1	0.997205	1	1	0.804087	1	1	0.233555	1	1	0.148944	1	1	1.00874	1	1	0.815623	1	1	-0.0846114	1	1	0.775185	1	1	0.582067	1	1
MAC_00193	Putative glycosyltransferase family 2 protein	41.7523	6.84717	30.1411	6.5931	34.6486	7.16622	39.9217	1.64509	50.9749	3.74945	43.7766	6.72209	-0.470125	0.00015	0.000993023	-0.269061	0.02945	0.0895671	-0.0646847	0.601	0.760016	0.28793	0.0167	0.0566913	0.0683023	0.5805	0.744971	0.201065	0.10905	0.24303	0.405441	0.00145	0.0073241	0.758055	5e-05	0.000362775	0.538428	5e-05	0.000362775	0.204376	0.1003	0.228502	0.55699	5e-05	0.000362775	0.337363	0.00675	0.0270224
MAC_00194	Uncharacterized protein	0.18809	0.166832	0	0	0	0	0	0	0	0	0	0	#NAME?	1	1	#NAME?	1	1	#NAME?	1	1	#NAME?	1	1	#NAME?	1	1	0	1	1	0	1	1	0	1	1	0	1	1	0	1	1	0	1	1	0	1	1
MAC_00195	Glucan 1,3-beta-glucosidase	42.1623	2.00743	30.7825	3.29987	34.9079	5.81	42.2174	0.752779	52.7918	0.223881	49.0145	2.35226	-0.453844	0.00065	0.00364841	-0.272401	0.0377	0.108704	0.00188302	0.99035	0.994426	0.32436	0.01125	0.041119	0.217255	0.08765	0.206828	0.181443	0.17315	0.338954	0.455727	0.00065	0.00364841	0.778204	5e-05	0.000362775	0.671099	5e-05	0.000362775	0.274284	0.0369	0.106915	0.596761	5e-05	0.000362775	0.489656	0.0002	0.00128619
MAC_00196	Beta-Ig-H3/Fasciclin	16.6531	4.60537	12.3581	2.41219	12.2011	1.55953	9.56883	2.52065	14.0941	2.68366	20.5038	4.05537	-0.43034	0.01025	0.0381042	-0.448787	0.0087	0.0333083	-0.799379	5e-05	0.000362775	-0.240707	0.1393	0.290348	0.300097	0.0542	0.14386	-0.0184465	0.9124	0.956215	-0.369039	0.0409	0.115759	0.189633	0.2616	0.450327	0.730438	5e-05	0.000362775	-0.350593	0.0527	0.140777	0.208079	0.21975	0.400672	0.748884	5e-05	0.000362775
MAC_00197	Uncharacterized protein	127.335	6.27986	123.901	12.601	122.273	10.6763	124.583	3.57467	123.204	5.61302	125.039	14.5812	-0.0394428	0.74745	0.860305	-0.0585237	0.63405	0.784105	-0.0315241	0.7967	0.890359	-0.0475791	0.70235	0.831215	-0.026256	0.8364	0.913149	-0.0190809	0.87585	0.936138	0.00791877	0.9492	0.974892	-0.00813623	0.94685	0.973946	0.0131869	0.9192	0.959536	0.0269997	0.82685	0.907789	0.0109447	0.93345	0.967182	0.0322678	0.79855	0.891298
MAC_00198	C6 zinc finger domain protein	1.55351	0.312533	1.59917	1.65224	2.292	1.08448	0.872342	0.511884	1.885	0.227007	1.61266	1.40819	0.0417933	0.9378	0.969469	0.561075	0.25305	0.440471	-0.832568	0.26305	0.451892	0.279028	0.6044	0.76261	0.0539129	0.9366	0.968824	0.519282	0.2826	0.473776	-0.874361	0.23385	0.417876	0.237235	0.64835	0.794392	0.0121196	0.93285	0.966834	-1.39364	0.0802	0.193666	-0.282047	0.5483	0.720736	-0.507162	0.2868	0.478515
MAC_00199	3-demethylubiquinone-9 3-methyltransferase	1.48995	0.764622	0.678385	0.467311	1.31663	0.919262	0.612887	0.23564	1.23936	0.376068	0.746704	0.565562	-1.13509	0.32345	0.518169	-0.17842	0.81735	0.902406	-1.28157	0.2449	0.431054	-0.265669	0.7082	0.835175	-0.996658	0.4131	0.606136	0.956671	0.4203	0.612755	-0.146483	1	1	0.869422	0.41765	0.610379	0.138433	1	1	-1.10315	0.2962	0.488779	-0.0872496	0.9254	0.962866	-0.818238	0.43815	0.628978
MAC_00200	Pfs, NACHT and WD domain protein	0	0	0.0471466	0.0816604	0.042087	0.0728968	0	0	0	0	0	0	inf	1	1	inf	1	1	0	1	1	0	1	1	0	1	1	-0.16378	1	1	#NAME?	1	1	#NAME?	1	1	#NAME?	1	1	#NAME?	1	1	#NAME?	1	1	#NAME?	1	1
MAC_00201	Arg-6 protein	108.582	2.62362	116.283	5.08721	114.303	4.917	89.0991	5.29033	97.8273	4.94676	97.3288	3.4332	0.098864	0.41065	0.603929	0.0740817	0.54035	0.714376	-0.285299	0.0197	0.0647623	-0.150472	0.21535	0.395232	-0.157843	0.19595	0.369984	-0.0247823	0.8399	0.915196	-0.384163	0.00205	0.00987573	-0.249336	0.0395	0.112704	-0.256707	0.0354	0.103441	-0.359381	0.0031	0.0140312	-0.224554	0.06315	0.161757	-0.231925	0.0563	0.148016
MAC_00202	Synaptobrevin	444.814	31.0174	376.164	25.769	368.878	12.6563	393.269	21.6002	375.4	9.06214	376.842	17.7948	-0.24184	0.05155	0.138412	-0.270058	0.02905	0.0885996	-0.177686	0.14485	0.298467	-0.244772	0.0461	0.127012	-0.239241	0.0537	0.142819	-0.0282178	0.82005	0.903944	0.0641546	0.5999	0.759157	-0.00293178	0.9798	0.989359	0.00259926	0.9825	0.99058	0.0923724	0.44725	0.637124	0.025286	0.8314	0.910382	0.030817	0.7969	0.890478
MAC_00203	Capsule associated protein, putative	26.6811	1.59681	31.1767	2.54944	30.7371	3.78372	26.0618	0.297455	27.1854	1.74193	29.0263	2.15001	0.224652	0.08135	0.195733	0.204164	0.1146	0.251903	-0.0338808	0.7969	0.890478	0.0270117	0.836	0.912969	0.12154	0.34555	0.541097	-0.0204877	0.87335	0.934727	-0.258533	0.0488	0.132651	-0.19764	0.13035	0.276807	-0.103112	0.42565	0.617725	-0.238045	0.06845	0.171748	-0.177153	0.17335	0.339212	-0.0826242	0.5181	0.696714
MAC_00204	rRNA adenine N(6)-methyltransferase	53.6514	5.75129	51.2446	3.44128	29.1204	1.6634	34.3819	1.50739	32.4096	1.48713	32.4472	3.06899	-0.0662142	0.5984	0.758146	-0.881584	5e-05	0.000362775	-0.641966	5e-05	0.000362775	-0.727194	5e-05	0.000362775	-0.72552	5e-05	0.000362775	-0.81537	5e-05	0.000362775	-0.575752	5e-05	0.000362775	-0.66098	5e-05	0.000362775	-0.659306	5e-05	0.000362775	0.239618	0.06775	0.170442	0.15439	0.23895	0.423807	0.156064	0.23335	0.417306
MAC_00205	Vacuolar protein sorting-associated protein VPS4	121.641	4.41296	114.005	9.38169	134.41	5.78219	114.046	2.87687	109.571	3.13601	109.981	5.42441	-0.093522	0.44	0.630543	0.144018	0.2311	0.414605	-0.0930127	0.43865	0.629391	-0.150752	0.21935	0.400177	-0.145374	0.2301	0.413282	0.23754	0.0502	0.135624	0.000509374	0.99515	0.9968	-0.0572298	0.63755	0.786573	-0.0518515	0.66495	0.805962	-0.237031	0.05	0.135198	-0.29477	0.0153	0.0527986	-0.289392	0.0173	0.0583492
MAC_00206	Prefoldin subunit 6, putative	213.108	11.0022	168.594	5.57687	198.353	17.5628	211.43	7.02208	183.66	11.4591	210.519	9.77422	-0.338033	0.0113	0.0412618	-0.103513	0.4367	0.627707	-0.0114008	0.9273	0.963859	-0.214549	0.10815	0.241587	-0.0176329	0.89195	0.945043	0.23452	0.08825	0.207948	0.326632	0.01545	0.0532365	0.123484	0.3679	0.562857	0.3204	0.0174	0.0586071	0.0921127	0.48565	0.670518	-0.111036	0.40895	0.602547	0.0858806	0.52215	0.699989
MAC_00207	Endosome-associated ubiquitin isopeptidase (AmsH)	27.8327	1.9495	29.3038	1.76749	28.8197	1.95361	29.9576	3.37746	36.4637	5.34467	29.5699	1.2585	0.0743083	0.5901	0.751948	0.0502752	0.7101	0.836425	0.10614	0.4404	0.630861	0.38968	0.005	0.020974	0.0873505	0.5211	0.699154	-0.0240332	0.8603	0.927388	0.0318322	0.81775	0.90256	0.315371	0.0186	0.061857	0.0130421	0.92495	0.962583	0.0558653	0.68645	0.820734	0.339404	0.01145	0.0416909	0.0370753	0.78505	0.883305
MAC_00208	Fatty acid oxygenase, putative	39.7511	7.94155	27.3635	3.15956	39.4346	4.71698	74.9397	18.3723	87.7546	13.9794	65.1861	2.44005	-0.53874	5e-05	0.000362775	-0.0115313	0.9257	0.963041	0.914736	5e-05	0.000362775	1.14248	5e-05	0.000362775	0.71357	5e-05	0.000362775	0.527209	5e-05	0.000362775	1.45348	5e-05	0.000362775	1.68122	5e-05	0.000362775	1.25231	5e-05	0.000362775	0.926267	5e-05	0.000362775	1.15401	5e-05	0.000362775	0.725102	5e-05	0.000362775
MAC_00209	Uncharacterized protein	2.14866	0.113967	1.29822	0.48236	2.311	0.450507	3.46988	1.4407	5.81472	1.26282	2.95696	0.617651	-0.726905	0.0675	0.16994	0.105079	0.7533	0.863986	0.691451	0.0311	0.0934367	1.43627	5e-05	0.000362775	0.460679	0.1534	0.311092	0.831985	0.03705	0.107265	1.41836	0.00085	0.00460684	2.16318	5e-05	0.000362775	1.18758	0.00425	0.0183056	0.586372	0.0554	0.146206	1.33119	0.0001	0.000686749	0.3556	0.2568	0.444703
MAC_00210	Amine oxidase	23.3198	2.92948	20.6786	3.47443	27.5132	2.47534	25.1601	4.65016	21.203	2.23073	32.1982	1.6312	-0.173418	0.2236	0.405417	0.238566	0.08555	0.203206	0.10958	0.4314	0.622924	-0.137288	0.33495	0.530439	0.465426	0.001	0.00530838	0.411985	0.0039	0.0170189	0.282998	0.0463	0.127422	0.0361299	0.8	0.892044	0.638844	5e-05	0.000362775	-0.128986	0.34675	0.542198	-0.375855	0.00805	0.0312329	0.22686	0.0916	0.213705
MAC_00211	GABA permease GabA	0.302342	0.299233	0.687766	0.0685304	0.624143	0.444113	0.638194	0.213475	0.283699	0.246154	0.46042	0.219552	1.18573	1	1	1.04569	1	1	1.07781	1	1	-0.0918239	1	1	0.606767	1	1	-0.140041	1	1	-0.107923	1	1	-1.27756	1	1	-0.578967	1	1	0.0321184	1	1	-1.13752	1	1	-0.438926	1	1
MAC_00212	AMP-binding enzyme, putative	3.74122	1.53802	4.25279	2.88072	4.99145	2.1956	4.39567	0.646651	3.53783	0.816644	3.76922	1.53471	0.184902	0.39405	0.588566	0.415949	0.04985	0.134875	0.232573	0.2693	0.458853	-0.0806467	0.7097	0.836247	0.0107555	0.95525	0.977954	0.231048	0.26915	0.458686	0.0476717	0.8217	0.905001	-0.265548	0.2177	0.398183	-0.174146	0.424	0.616322	-0.183376	0.3657	0.560649	-0.496596	0.01835	0.0611924	-0.405194	0.05505	0.145548
MAC_00213	Cystathionine beta-lyase, putative	0.467512	0.093984	0.467053	0.0577751	0.244993	0.02117	0.462367	0.148714	0.635187	0.235499	0.419309	0.142864	-0.00141794	1	1	-0.932262	1	1	-0.0159673	1	1	0.442176	1	1	-0.15699	1	1	-0.930844	1	1	-0.0145493	1	1	0.443594	1	1	-0.155572	1	1	0.916294	1	1	1.37444	1	1	0.775272	1	1
MAC_00214	Uncharacterized protein	43.7125	5.02371	35.7934	7.77057	61.6969	9.23761	81.1025	18.2687	71.486	11.3313	66.0009	12.6842	-0.288353	0.06055	0.156616	0.497152	0.00065	0.00364841	0.8917	5e-05	0.000362775	0.709614	5e-05	0.000362775	0.594439	5e-05	0.000362775	0.785504	5e-05	0.000362775	1.18005	5e-05	0.000362775	0.997966	5e-05	0.000362775	0.882792	5e-05	0.000362775	0.394548	0.00465	0.0197441	0.212462	0.1254	0.268967	0.0972878	0.4837	0.668895
MAC_00215	Carboxylic ester hydrolase	2.02681	0.225911	1.03442	0.205596	3.22625	0.278764	4.82508	1.13543	4.06876	0.572544	4.64924	1.45086	-0.970394	0.0035	0.0155305	0.670647	0.0102	0.0379591	1.25134	5e-05	0.000362775	1.00538	0.00015	0.000993023	1.19778	5e-05	0.000362775	1.64104	5e-05	0.000362775	2.22174	5e-05	0.000362775	1.97577	5e-05	0.000362775	2.16818	5e-05	0.000362775	0.580695	0.00775	0.0302805	0.334731	0.13255	0.280202	0.527137	0.01635	0.0557327
MAC_00216	Uncharacterized protein	8.21867	0.918088	6.53389	2.68973	18.9049	3.9841	15.9494	2.31002	12.7595	1.13399	11.8961	1.18496	-0.330962	0.09475	0.219164	1.20178	5e-05	0.000362775	0.95653	5e-05	0.000362775	0.634592	0.0005	0.0029	0.533509	0.00335	0.0149749	1.53275	5e-05	0.000362775	1.28749	5e-05	0.000362775	0.965554	5e-05	0.000362775	0.864471	5e-05	0.000362775	-0.245254	0.11415	0.251126	-0.567192	0.0005	0.0029	-0.668275	0.0001	0.000686749
MAC_00217	Acyl-CoA dehydrogenase, putative	29.6531	2.49271	27.4303	4.60301	44.4085	6.75344	40.1214	4.86921	24.2126	3.11198	25.5947	2.24993	-0.112415	0.41875	0.611384	0.582652	5e-05	0.000362775	0.436189	0.00155	0.00776179	-0.292423	0.04005	0.113918	-0.212337	0.13165	0.278897	0.695066	5e-05	0.000362775	0.548604	0.00015	0.000993023	-0.180008	0.20575	0.38275	-0.0999222	0.4847	0.669719	-0.146463	0.2698	0.459378	-0.875075	5e-05	0.000362775	-0.794989	5e-05	0.000362775
MAC_00218	Uncharacterized protein	0.0918237	0.159043	0	0	0	0	0	0	0	0	0.422902	0.73249	#NAME?	1	1	#NAME?	1	1	#NAME?	1	1	#NAME?	1	1	2.20339	1	1	0	1	1	0	1	1	0	1	1	inf	1	1	0	1	1	0	1	1	inf	1	1
MAC_00220	Uncharacterized protein	2.20178	0.139479	1.88726	0.310477	2.64481	0.832354	2.35764	0.664918	2.54078	0.552494	2.61743	0.272123	-0.222379	0.3976	0.591716	0.264494	0.2824	0.473581	0.0986765	0.69095	0.823692	0.206605	0.4086	0.602274	0.249483	0.31565	0.509669	0.486874	0.06105	0.157647	0.321056	0.22185	0.403319	0.428984	0.10425	0.235116	0.471862	0.07085	0.176256	-0.165818	0.49385	0.677331	-0.0578899	0.81625	0.901712	-0.0150119	0.9431	0.972098
MAC_00221	Fungal specific transcription factor, putative	1.81932	0.446157	1.49913	0.558101	2.43392	0.534169	2.73165	0.66033	2.28482	0.285523	2.40825	0.687352	-0.279272	0.34185	0.537474	0.419882	0.12505	0.26841	0.586373	0.0318	0.0951149	0.328681	0.23	0.413168	0.404587	0.1383	0.288815	0.699154	0.01535	0.0529462	0.865645	0.00315	0.0142182	0.607953	0.03295	0.0978257	0.683859	0.0169	0.0572499	0.166491	0.50345	0.685046	-0.0912008	0.71875	0.842388	-0.0152953	0.96615	0.982895
MAC_00222	Alcohol dehydrogenase	6.02814	1.44845	6.00977	1.99139	7.02575	0.376292	5.78326	0.515494	4.58509	0.316784	2.40501	0.425533	-0.00440267	0.9806	0.989691	0.22094	0.3116	0.505352	-0.0598302	0.78545	0.883507	-0.394762	0.0881	0.207689	-1.32567	5e-05	0.000362775	0.225343	0.3009	0.493902	-0.0554275	0.805	0.894973	-0.390359	0.0915	0.21352	-1.32126	5e-05	0.000362775	-0.28077	0.20235	0.378491	-0.615702	0.0077	0.0301135	-1.54661	5e-05	0.000362775
MAC_00223	BZIP transcription factor (Fcr3), putative	0.515035	0.161072	0.509281	0.664225	1.72432	1.07166	0.970151	0.829552	1.01002	0.480924	0.548426	0.230348	-0.0162095	1	1	1.74329	0.13975	0.290998	0.913538	1	1	0.971643	1	1	0.0906247	1	1	1.7595	0.1422	0.294694	0.929747	1	1	0.987853	1	1	0.106834	1	1	-0.829749	0.1985	0.373388	-0.771643	0.2344	0.418522	-1.65266	0.01835	0.0611924
MAC_00224	GAL4 &amp; Fungal specific transcription factor domain containing protein	0.0206085	0.0356949	0.0581699	0.0504491	0.0730223	0.0760396	0.213639	0.178107	0.0981129	0.0226256	0.080522	0.0855102	1.49704	1	1	1.8251	1	1	3.37387	1	1	2.2512	1	1	1.96615	1	1	0.328063	1	1	1.87683	1	1	0.754169	1	1	0.46911	1	1	1.54877	1	1	0.426106	1	1	0.141046	1	1
MAC_00225	Uncharacterized protein	0.0695254	0.0616862	0.0411868	0.0404012	0.0227228	0.0197839	0.103156	0.0173108	0.113959	0.0696759	0.103396	0.0307596	-0.75536	1	1	-1.6134	1	1	0.569218	1	1	0.712902	1	1	0.572572	1	1	-0.858041	1	1	1.32458	1	1	1.46826	1	1	1.32793	1	1	2.18262	1	1	2.3263	1	1	2.18597	1	1
MAC_00226	ATP-dependent RNA helicase Prp43	0	0	0.148166	0.0121816	0.0475263	0.082318	0.202585	0.090482	0.0367427	0.0636402	0.0421681	0.0730371	inf	1	1	inf	1	1	inf	1	1	inf	1	1	inf	1	1	-1.64041	1	1	0.451319	1	1	-2.01168	1	1	-1.81299	1	1	2.09173	1	1	-0.371268	1	1	-0.172573	1	1
MAC_00227	Beta-lactamase family protein	0.684197	0.126822	0.34366	0.059725	0.639056	0.195978	0.921652	0.29438	0.946597	0.0970416	1.24866	0.350594	-0.993428	1	1	-0.0984688	1	1	0.429811	1	1	0.468339	1	1	0.867897	0.02815	0.086384	0.894959	1	1	1.42324	1	1	1.46177	1	1	1.86132	0.01225	0.0440088	0.528279	1	1	0.566808	1	1	0.966365	0.01915	0.0633054
MAC_00228	Phosphatidylserine decarboxylase family protein	4.95043	2.18695	2.57589	0.416042	5.81173	0.823201	11.3908	3.35544	34.6883	12.0135	9.95882	6.11465	-0.942484	0.00035	0.00212064	0.231416	0.2832	0.474455	1.20224	5e-05	0.000362775	2.80883	5e-05	0.000362775	1.00842	5e-05	0.000362775	1.1739	5e-05	0.000362775	2.14473	5e-05	0.000362775	3.75131	5e-05	0.000362775	1.95091	5e-05	0.000362775	0.970827	5e-05	0.000362775	2.57741	5e-05	0.000362775	0.777006	0.00015	0.000993023
MAC_00229	Amino acid permease, putative	8.94484	1.76389	10.835	4.32787	50.8711	4.69658	36.8226	5.73238	45.209	3.05729	39.0924	1.73613	0.276575	0.11865	0.258192	2.50772	5e-05	0.000362775	2.04147	5e-05	0.000362775	2.33748	5e-05	0.000362775	2.12776	5e-05	0.000362775	2.23114	5e-05	0.000362775	1.76489	5e-05	0.000362775	2.06091	5e-05	0.000362775	1.85119	5e-05	0.000362775	-0.466252	0.0005	0.0029	-0.170236	0.1783	0.346155	-0.379957	0.00305	0.0138366
MAC_00230	Uncharacterized protein	3.23644	0.289663	3.34691	1.29031	10.4658	1.68655	6.89045	1.13643	7.15453	0.705885	7.07544	0.625796	0.0484231	0.8343	0.912081	1.69321	5e-05	0.000362775	1.09019	5e-05	0.000362775	1.14445	5e-05	0.000362775	1.12841	5e-05	0.000362775	1.64478	5e-05	0.000362775	1.04177	5e-05	0.000362775	1.09603	5e-05	0.000362775	1.07999	5e-05	0.000362775	-0.603014	0.00095	0.00507718	-0.548755	0.003	0.0136591	-0.564793	0.0018	0.00883347
MAC_00231	Uncharacterized protein	252.012	4.42457	190.213	16.3472	257.724	8.24738	289.488	8.71193	295.153	23.9844	245.951	6.91738	-0.405875	0.0011	0.00576616	0.0323318	0.79855	0.891298	0.200011	0.11475	0.252134	0.227971	0.0741	0.182275	-0.0351191	0.7803	0.880236	0.438207	0.00075	0.00413583	0.605886	5e-05	0.000362775	0.633846	5e-05	0.000362775	0.370756	0.00305	0.0138366	0.16768	0.19075	0.363014	0.195639	0.1274	0.272196	-0.0674509	0.5995	0.758898
MAC_00232	Uncharacterized protein	3.64818	1.77388	3.01461	1.22975	2.24061	0.635353	3.51348	1.48281	4.29149	0.799641	3.14032	1.60698	-0.275203	0.5205	0.698658	-0.703285	0.1642	0.326639	-0.0542737	0.9048	0.952115	0.234304	0.54585	0.718692	-0.216265	0.60795	0.765127	-0.428082	0.4088	0.602419	0.220929	0.6099	0.76672	0.509507	0.21555	0.395489	0.0589382	0.9098	0.954882	0.649011	0.20335	0.379773	0.937589	0.07075	0.17606	0.487021	0.34065	0.536204
MAC_00233	Nuclear migration protein nudF	95.4446	6.39656	106.196	15.2811	108.477	4.95367	78.6858	5.24728	79.9885	2.29548	87.0234	4.42372	0.154	0.21165	0.390463	0.184654	0.12995	0.276208	-0.27856	0.02465	0.077672	-0.254872	0.0386	0.11076	-0.13326	0.27565	0.466017	0.0306534	0.80935	0.897796	-0.43256	0.0006	0.00340137	-0.408872	0.0011	0.00576616	-0.28726	0.0203	0.0663701	-0.463214	0.00025	0.00157207	-0.439525	0.00045	0.00264476	-0.317914	0.00955	0.0359531
MAC_00234	Uncharacterized protein	311.325	6.21941	318.275	21.8268	300.75	6.86157	272.984	5.99222	281.78	5.21338	272.074	8.55772	0.0318514	0.7997	0.891861	-0.0498583	0.68515	0.819857	-0.189605	0.11805	0.257255	-0.143856	0.24235	0.428025	-0.194422	0.1097	0.244072	-0.0817097	0.50595	0.686938	-0.221457	0.07035	0.175324	-0.175707	0.1523	0.309442	-0.226273	0.0664	0.167905	-0.139747	0.24725	0.433828	-0.0939978	0.441	0.631408	-0.144563	0.22985	0.412982
MAC_00235	Phosphoinositide 3-phosphate phosphatase	25.407	2.32047	22.0903	1.18356	24.0555	0.760853	23.9209	3.72883	21.6016	1.57209	19.7464	0.135148	-0.201817	0.1466	0.3011	-0.078861	0.56295	0.731929	-0.0869551	0.5281	0.70486	-0.234089	0.09385	0.217637	-0.363637	0.01005	0.0374794	0.122956	0.37865	0.57341	0.114862	0.41305	0.606084	-0.0322724	0.82425	0.906396	-0.161821	0.25535	0.443012	-0.00809412	0.9546	0.977587	-0.155228	0.26675	0.455963	-0.284776	0.0429	0.120194
MAC_00236	C-type cyclin	24.9217	2.25228	22.2379	1.06168	32.2176	2.80986	39.3983	9.30698	27.3547	2.77208	25.1451	1.38039	-0.16438	0.1867	0.357526	0.370447	0.0028	0.0128752	0.660732	5e-05	0.000362775	0.134384	0.27505	0.465306	0.0128763	0.9148	0.957449	0.534827	5e-05	0.000362775	0.825112	5e-05	0.000362775	0.298764	0.01625	0.0554724	0.177257	0.15635	0.315277	0.290285	0.0191	0.0631771	-0.236063	0.0536	0.142623	-0.357571	0.00375	0.0164672
MAC_00237	MHYT domain signaling protein, putative	183.423	25.8714	141.401	21.701	145.356	12.3219	185.72	32.5595	118.443	2.37046	115.953	6.11037	-0.375387	0.0046	0.0195686	-0.335585	0.01	0.0373265	0.0179522	0.8918	0.944988	-0.630989	5e-05	0.000362775	-0.661632	5e-05	0.000362775	0.039802	0.7539	0.864387	0.393339	0.0022	0.0104899	-0.255602	0.0435	0.121457	-0.286245	0.02305	0.0735353	0.353537	0.00765	0.0299612	-0.295404	0.01895	0.0627794	-0.326047	0.01105	0.0405309
MAC_00238	Uncharacterized protein	40.8308	7.40118	57.9855	5.6933	32.0376	8.16521	26.3609	2.04096	22.9611	1.80308	21.1102	1.33913	0.506034	0.0001	0.000686749	-0.349894	0.00705	0.0280143	-0.631259	5e-05	0.000362775	-0.830465	5e-05	0.000362775	-0.951717	5e-05	0.000362775	-0.855928	5e-05	0.000362775	-1.13729	5e-05	0.000362775	-1.3365	5e-05	0.000362775	-1.45775	5e-05	0.000362775	-0.281364	0.034	0.100271	-0.480571	0.00045	0.00264476	-0.601823	5e-05	0.000362775
MAC_00239	Uncharacterized protein	48.4812	7.68641	62.7069	2.63104	70.3137	2.81615	66.4487	3.43886	60.5456	1.35627	72.6734	4.23084	0.3712	0.0232	0.0739172	0.536382	0.0008	0.00436954	0.454815	0.0052	0.0216829	0.320598	0.05065	0.13657	0.584002	0.00025	0.00157207	0.165182	0.28535	0.476876	0.0836159	0.59385	0.754771	-0.0506018	0.7493	0.861319	0.212803	0.1666	0.33001	-0.0815661	0.59435	0.755106	-0.215784	0.1626	0.324488	0.0476208	0.7551	0.865159
MAC_00240	Uncharacterized protein	93.7991	4.95596	91.3766	5.06346	88.6774	4.5573	89.5035	4.97904	98.4188	1.07957	89.075	3.10525	-0.0377493	0.75455	0.86483	-0.0810082	0.5148	0.694137	-0.0676293	0.57955	0.744197	0.0693606	0.57255	0.739021	-0.0745534	0.5436	0.716883	-0.0432589	0.72815	0.848069	-0.02988	0.81225	0.899625	0.10711	0.37935	0.574009	-0.0368041	0.7664	0.871907	0.013379	0.91615	0.958128	0.150369	0.2222	0.403743	0.00645484	0.959	0.979789
MAC_00241	Palmitoyl-protein thioesterase, putative	17.989	1.75487	15.855	2.5164	12.0032	1.27411	14.3265	2.10213	13.8213	1.74445	15.3177	1.69307	-0.182182	0.2884	0.480219	-0.5837	0.0013	0.00666464	-0.328431	0.05785	0.15121	-0.380221	0.0287	0.0877429	-0.231914	0.1771	0.344421	-0.401518	0.02525	0.0791756	-0.146248	0.4077	0.601425	-0.198038	0.26795	0.457317	-0.049732	0.7751	0.877026	0.25527	0.16275	0.324683	0.20348	0.26705	0.4563	0.351786	0.05225	0.139842
MAC_00242	Electron transfer flavoprotein alpha-subunit	224.918	3.38537	187.654	41.0565	174.701	25.8482	263.927	15.4469	251.805	16.473	256.102	13.6827	-0.261325	0.0314	0.0941652	-0.364506	0.00265	0.0122799	0.230742	0.06065	0.156812	0.162906	0.182	0.351065	0.187318	0.1239	0.266572	-0.103182	0.4055	0.599345	0.492067	5e-05	0.000362775	0.424231	0.0003	0.00184856	0.448643	0.00025	0.00157207	0.595248	5e-05	0.000362775	0.527413	5e-05	0.000362775	0.551824	5e-05	0.000362775
MAC_00243	Uncharacterized protein	43.7938	0.903667	59.1947	6.25333	81.0492	4.79442	83.7733	1.91885	89.1263	6.65916	81.5301	2.64344	0.43474	0.00045	0.00264476	0.888071	5e-05	0.000362775	0.935764	5e-05	0.000362775	1.02512	5e-05	0.000362775	0.896606	5e-05	0.000362775	0.453331	0.0002	0.00128619	0.501024	5e-05	0.000362775	0.590385	5e-05	0.000362775	0.461866	0.00035	0.00212064	0.0476927	0.6924	0.824615	0.137054	0.2598	0.448189	0.00853455	0.9432	0.97216
MAC_00244	Uncharacterized protein	9.01688	2.64646	10.4076	0.507072	8.62162	2.29604	14.4679	3.79317	12.8599	2.60968	13.2594	1.50995	0.206942	0.4285	0.620356	-0.0646691	0.8121	0.899515	0.682151	0.0088	0.0336301	0.512184	0.0461	0.127012	0.556319	0.0309	0.0929682	-0.271611	0.31115	0.504853	0.475209	0.0503	0.135835	0.305242	0.21315	0.392462	0.349377	0.14995	0.305971	0.74682	0.0055	0.0227569	0.576853	0.029	0.0884731	0.620988	0.01955	0.0643695
MAC_00245	Conserved serine-threonine rich protein	31.7234	4.87561	57.4481	18.1744	45.0566	6.52815	23.2864	1.20672	30.1872	2.26759	32.5849	3.62804	0.85671	5e-05	0.000362775	0.506191	5e-05	0.000362775	-0.446059	0.0004	0.00238366	-0.0716119	0.5678	0.735369	0.0386555	0.74945	0.861389	-0.350519	0.00565	0.0232885	-1.30277	5e-05	0.000362775	-0.928322	5e-05	0.000362775	-0.818055	5e-05	0.000362775	-0.95225	5e-05	0.000362775	-0.577803	5e-05	0.000362775	-0.467535	0.00025	0.00157207
MAC_00246	Uncharacterized protein	45.4024	3.3557	47.7796	1.60732	43.3605	8.70863	60.0197	2.95731	44.7396	0.813388	55.7236	4.19786	0.073626	0.5893	0.751328	-0.0663889	0.62395	0.776585	0.402665	0.003	0.0136591	-0.0212178	0.87415	0.935189	0.29552	0.02705	0.0836354	-0.140015	0.29805	0.490784	0.329039	0.01495	0.051812	-0.0948438	0.4809	0.666593	0.221894	0.09365	0.217286	0.469054	0.0004	0.00238366	0.0451712	0.7414	0.856471	0.361909	0.0078	0.0304366
MAC_00247	Uncharacterized protein	1.24401	0.696795	2.1264	1.57089	1.10619	0.599423	0	0	0.170403	0.295146	0.179137	0.310275	0.773409	0.3455	0.541046	-0.169401	0.8624	0.928381	#NAME?	0.00135	0.00688777	-2.86798	0.1693	0.33378	-2.79586	0.1804	0.348952	-0.942811	0.22155	0.402927	#NAME?	5e-05	0.000362775	-3.64139	0.15685	0.315957	-3.56927	0.16425	0.326717	#NAME?	1	1	-2.69858	1	1	-2.62646	1	1
MAC_00248	Uncharacterized protein	0.683658	0.0983636	1.30587	0.858595	1.35548	1.15473	0.56781	0.0219406	0.182209	0.315595	0.173911	0.152554	0.933667	0.22905	0.412003	0.987455	0.22895	0.41187	-0.267866	1	1	-1.90768	1	1	-1.97493	1	1	0.053788	0.934	0.967526	-1.20153	0.08925	0.209618	-2.84135	0.25265	0.439917	-2.9086	0.2501	0.437042	-1.25532	0.08255	0.197863	-2.89514	0.2526	0.439848	-2.96238	0.25	0.436916
MAC_00249	LEA domain protein	9.92675	0.561624	20.8951	4.21668	29.9752	7.91613	9.97429	1.24356	8.71555	0.643465	10.4444	1.87118	1.07377	5e-05	0.000362775	1.59438	5e-05	0.000362775	0.00689196	0.98205	0.990407	-0.18773	0.3772	0.572022	0.0733359	0.7227	0.844869	0.520608	0.0019	0.00925559	-1.06688	5e-05	0.000362775	-1.2615	5e-05	0.000362775	-1.00043	5e-05	0.000362775	-1.58749	5e-05	0.000362775	-1.78211	5e-05	0.000362775	-1.52104	5e-05	0.000362775
MAC_00250	LEA domain containing protein	16.7677	1.15451	17.8187	0.457544	17.2397	0.695149	14.7392	1.47446	14.5564	0.845314	16.907	0.395268	0.0877135	0.5006	0.682706	0.0400564	0.7583	0.867091	-0.186021	0.1564	0.315321	-0.204033	0.12215	0.263742	0.011938	0.92255	0.961476	-0.0476571	0.71425	0.839327	-0.273734	0.03715	0.107492	-0.291746	0.0274	0.0845097	-0.0757754	0.5586	0.728511	-0.226077	0.0843	0.200981	-0.244089	0.06465	0.164596	-0.0281183	0.82255	0.905464
MAC_00251	C3HC4 type (RING finger) zinc finger containing protein	30.4265	1.87769	27.2607	1.30408	21.8678	1.06557	15.4663	2.44544	15.1725	0.824342	15.7197	1.24282	-0.158507	0.18945	0.361225	-0.476522	0.0001	0.000686749	-0.976198	5e-05	0.000362775	-1.00387	5e-05	0.000362775	-0.952753	5e-05	0.000362775	-0.318015	0.0095	0.035793	-0.817691	5e-05	0.000362775	-0.845365	5e-05	0.000362775	-0.794246	5e-05	0.000362775	-0.499676	5e-05	0.000362775	-0.52735	5e-05	0.000362775	-0.476232	0.00025	0.00157207
MAC_00252	Putative cyclin-supressing protein kinase	57.8644	2.89146	41.2242	3.485	32.0565	1.29799	26.2313	1.614	24.2617	1.84036	26.076	2.68731	-0.489187	0.0003	0.00184856	-0.85206	5e-05	0.000362775	-1.14139	5e-05	0.000362775	-1.254	5e-05	0.000362775	-1.14995	5e-05	0.000362775	-0.362873	0.0084	0.0323248	-0.6522	5e-05	0.000362775	-0.764811	5e-05	0.000362775	-0.660765	5e-05	0.000362775	-0.289327	0.03945	0.112597	-0.401938	0.00555	0.0229348	-0.297892	0.0357	0.104125
MAC_00253	Fes/CIP4 domain-containing protein	87.5634	3.81472	82.2092	5.37112	69.2913	0.498606	57.2474	3.39372	58.7734	3.08695	61.2215	1.39892	-0.0910282	0.4513	0.640876	-0.337654	0.0053	0.022046	-0.613118	5e-05	0.000362775	-0.575164	5e-05	0.000362775	-0.51629	5e-05	0.000362775	-0.246625	0.0411	0.116206	-0.522089	5e-05	0.000362775	-0.484136	0.0001	0.000686749	-0.425262	0.00045	0.00264476	-0.275464	0.0218	0.0702754	-0.237511	0.0482	0.131393	-0.178636	0.13965	0.290868
MAC_00254	MMP37-like protein	55.1113	0.527444	55.5852	1.92493	63.5236	1.67226	65.842	2.64898	61.8434	1.8465	65.772	2.88028	0.0123523	0.9189	0.959392	0.204946	0.0942	0.218225	0.25666	0.03755	0.108365	0.166272	0.1767	0.343891	0.255127	0.03945	0.112597	0.192594	0.1192	0.259062	0.244308	0.04705	0.12895	0.15392	0.2124	0.391475	0.242774	0.04875	0.132561	0.0517137	0.6716	0.81047	-0.038674	0.7462	0.859535	0.0501803	0.6792	0.815678
MAC_00255	Putative spindle assembly checkpoint protein	52.1926	1.11555	56.1518	0.947732	55.6634	1.64422	57.0829	1.445	61.2579	0.625948	55.0838	3.72267	0.105488	0.3869	0.581488	0.0928844	0.4474	0.637258	0.129215	0.2856	0.477134	0.231051	0.0605	0.156519	0.0777837	0.52895	0.705458	-0.0126032	0.918	0.959055	0.0237269	0.8521	0.922536	0.125564	0.30085	0.493859	-0.027704	0.8282	0.908517	0.0363301	0.7688	0.873312	0.138167	0.25755	0.445618	-0.0151007	0.9045	0.951977
MAC_00256	ATP-dependent RNA helicase SUV3	88.5439	3.20791	88.6542	7.18594	85.6462	7.27901	102.647	5.73216	97.7143	7.52	104.944	5.83141	0.00179553	0.98705	0.99277	-0.0480048	0.6904	0.823313	0.213221	0.07575	0.185359	0.142176	0.23735	0.422052	0.245155	0.04355	0.121548	-0.0498004	0.68335	0.81864	0.211425	0.08165	0.196295	0.14038	0.2494	0.436192	0.243359	0.0467	0.128228	0.261226	0.0301	0.0910721	0.190181	0.1167	0.255202	0.293159	0.01435	0.0500996
MAC_00257	FMI2 protein	24.3109	4.20692	26.3546	1.33752	31.8688	2.86425	35.5084	5.3321	32.4498	2.54416	31.7335	1.03791	0.116454	0.4351	0.626268	0.390544	0.0088	0.0336301	0.546557	0.00025	0.00157207	0.41661	0.00475	0.0200933	0.384403	0.01045	0.0387066	0.27409	0.062	0.159524	0.430103	0.0031	0.0140312	0.300156	0.0401	0.114013	0.267949	0.0668	0.168676	0.156013	0.27095	0.460655	0.0260666	0.8586	0.926422	-0.00614063	0.96665	0.983163
MAC_00258	Uncharacterized protein	0.969666	0.431844	1.33397	0.528164	1.50654	0.132813	1.49541	0.286132	1.54274	0.0325164	1.37199	0.10401	0.460168	0.10415	0.234963	0.635681	0.0242	0.0765331	0.624981	0.0271	0.0837734	0.669933	0.01835	0.0611924	0.50071	0.07805	0.189682	0.175513	0.4915	0.675328	0.164813	0.51705	0.695964	0.209766	0.4127	0.605756	0.0405422	0.87055	0.933038	-0.0107002	0.9745	0.986687	0.0342524	0.88495	0.941281	-0.134971	0.59325	0.754309
MAC_00259	Glycosyl transferase family 17 protein	12.5224	2.41052	9.78436	0.474664	12.2717	1.11429	11.1231	2.77616	11.7349	2.3307	10.7492	0.841761	-0.355967	0.0538	0.143049	-0.0291852	0.8707	0.933102	-0.170953	0.35165	0.547042	-0.093716	0.61025	0.766936	-0.220289	0.2291	0.412057	0.326782	0.07475	0.183479	0.185014	0.31455	0.508506	0.262251	0.1516	0.308387	0.135678	0.4614	0.649651	-0.141768	0.4313	0.622823	-0.0645308	0.71935	0.842742	-0.191104	0.29075	0.482821
MAC_00260	Uncharacterized protein	4.72185	0.880841	4.23946	2.38344	2.38861	1.69557	2.46642	0.823095	2.5513	1.92156	2.57883	2.0604	-0.155471	0.7773	0.878421	-0.983182	0.12495	0.268256	-0.936931	0.1365	0.286064	-0.888121	0.1719	0.337297	-0.872634	0.18605	0.356594	-0.827711	0.2132	0.392508	-0.78146	0.2375	0.42221	-0.73265	0.29145	0.483499	-0.717162	0.29835	0.491109	0.0462509	0.92575	0.963061	0.0950612	0.9145	0.957279	0.110549	0.8916	0.944857
MAC_00261	Uncharacterized protein	0.0812572	0.140742	0	0	0.145424	0.126617	0.0895163	0.155047	0.0836339	0.144858	0	0	#NAME?	1	1	0.839698	1	1	0.139655	1	1	0.041593	1	1	#NAME?	1	1	inf	1	1	inf	1	1	inf	1	1	0	1	1	-0.700044	1	1	-0.798105	1	1	#NAME?	1	1
MAC_00262	Uncharacterized protein	1.4128	0.51542	0.858807	0.685653	1.28172	0.289664	0.928169	0.346621	1.06643	0.264018	0.55187	0.320405	-0.718152	0.13985	0.291129	-0.140471	0.732	0.850452	-0.606099	0.23105	0.41454	-0.405768	0.38215	0.576724	-1.35616	0.0417	0.117576	0.57768	0.24435	0.430421	0.112053	1	1	0.312384	1	1	-0.638004	1	1	-0.465627	0.36945	0.564403	-0.265296	0.5751	0.741006	-1.21568	0.0597	0.154865
MAC_00263	Uncharacterized protein	33.1035	4.17816	68.4726	12.3673	38.4258	13.1919	14.5797	0.625279	2.04983	0.383783	0.265207	0.459351	1.04854	5e-05	0.000362775	0.215092	0.3065	0.499778	-1.18302	5e-05	0.000362775	-4.01341	0.00265	0.0122799	-6.96372	0.16415	0.326597	-0.833449	0.0001	0.000686749	-2.23157	5e-05	0.000362775	-5.06195	0.00265	0.0122799	-8.01226	0.16415	0.326597	-1.39812	5e-05	0.000362775	-4.2285	0.00265	0.0122799	-7.17882	0.16415	0.326597
MAC_00264	Uncharacterized protein	0.756114	0.162276	1.11081	0.628716	0.343145	0.17489	0.252993	0.142007	0.297688	0.0186382	0.232324	0.0966218	0.554939	1	1	-1.13979	1	1	-1.57951	1	1	-1.34481	1	1	-1.70247	1	1	-1.69473	1	1	-2.13445	1	1	-1.89974	1	1	-2.2574	1	1	-0.439721	1	1	-0.205019	1	1	-0.562679	1	1
MAC_00265	Dicer-like protein 1	0.00944723	0.0163631	0	0	0.00796687	0.013799	0.00963973	0.0166965	0	0	0.00843762	0.0146144	#NAME?	1	1	-0.245879	1	1	0.0291005	1	1	#NAME?	1	1	-0.163056	1	1	inf	1	1	inf	1	1	0	1	1	inf	1	1	0.27498	1	1	#NAME?	1	1	0.0828229	1	1
MAC_00266	G-protein beta WD-40 repeats containing protein, putative	0	0	0	0	0	0	0.104618	0.181204	0	0	0	0	0	1	1	0	1	1	inf	1	1	0	1	1	0	1	1	0	1	1	inf	1	1	0	1	1	0	1	1	inf	1	1	0	1	1	0	1	1
MAC_00267	ABC-type Fe3+ transport system	15.0425	2.46649	28.3446	8.99199	15.8773	10.1773	3.25974	1.154	3.35539	0.358836	2.74196	0.155687	0.914022	5e-05	0.000362775	0.0779171	0.65855	0.801523	-2.20622	5e-05	0.000362775	-2.1645	5e-05	0.000362775	-2.45577	5e-05	0.000362775	-0.836105	5e-05	0.000362775	-3.12024	5e-05	0.000362775	-3.07852	5e-05	0.000362775	-3.36979	5e-05	0.000362775	-2.28414	5e-05	0.000362775	-2.24241	5e-05	0.000362775	-2.53368	5e-05	0.000362775
MAC_00270	Cytochrome P450 55A2	1.2853	0.262702	0.684124	0.384036	1.23675	0.0741432	2.18849	0.546575	1.66152	0.142608	1.9902	0.430743	-0.909774	0.06065	0.156812	-0.0555466	0.8771	0.936814	0.767834	0.0377	0.108704	0.370404	0.3179	0.512139	0.630812	0.08485	0.201925	0.854227	0.0739	0.181902	1.67761	0.00335	0.0149749	1.28018	0.0129	0.0459027	1.54059	0.00495	0.0208001	0.82338	0.02635	0.0818821	0.42595	0.2628	0.45168	0.686358	0.06405	0.163507
MAC_00271	Extracellular sialidase/neuraminidase	0.414993	0.166088	0.210932	0.190298	0.293737	0.322023	0.585441	0.419831	0.33003	0.0787532	0.711934	0.175672	-0.976306	1	1	-0.498562	1	1	0.496438	1	1	-0.330491	1	1	0.778658	1	1	0.477743	1	1	1.47274	1	1	0.645815	1	1	1.75496	1	1	0.995001	1	1	0.168072	1	1	1.27722	1	1
MAC_00272	SET domain-containing protein 5	0.173147	0.123502	0.144992	0.126835	0.319741	0.0975451	0.460674	0.32824	0.558135	0.091849	0.266675	0.181705	-0.256029	1	1	0.884909	1	1	1.41175	1	1	1.68862	1	1	0.623086	1	1	1.14094	1	1	1.66778	1	1	1.94464	1	1	0.879115	1	1	0.526839	1	1	0.803707	1	1	-0.261823	1	1
MAC_00273	Oxidoreductase, short chain dehydrogenase/reductase family	32.4004	7.41524	27.1836	2.34199	32.6558	2.74348	67.9135	24.5402	70.5973	10.6844	45.742	4.0971	-0.253275	0.042	0.118224	0.0113291	0.92255	0.961476	1.06769	5e-05	0.000362775	1.1236	5e-05	0.000362775	0.497509	5e-05	0.000362775	0.264604	0.03035	0.0916725	1.32096	5e-05	0.000362775	1.37688	5e-05	0.000362775	0.750784	5e-05	0.000362775	1.05636	5e-05	0.000362775	1.11227	5e-05	0.000362775	0.48618	0.0001	0.000686749
MAC_00274	Enoyl-CoA hydratase/carnithine racemase	4.06547	0.890804	3.89283	0.557233	6.55657	0.808326	5.07136	1.77293	4.32458	1.2473	3.44775	1.57081	-0.0626051	0.79355	0.888338	0.689519	0.00195	0.00946249	0.318951	0.16695	0.330535	0.0891366	0.70835	0.835289	-0.237768	0.33175	0.527068	0.752124	0.00075	0.00413583	0.381556	0.09395	0.217804	0.151742	0.5132	0.692813	-0.175163	0.4655	0.653332	-0.370569	0.08055	0.194278	-0.600383	0.00665	0.0266847	-0.927288	0.00025	0.00157207
MAC_00275	Rbm25 protein, putative	98.262	3.7515	89.5474	2.41808	77.2889	3.13122	83.3078	6.44457	85.8935	1.10789	84.1627	5.19353	-0.133982	0.26885	0.458337	-0.346372	0.00515	0.0215076	-0.238181	0.05065	0.13657	-0.194085	0.11325	0.249751	-0.223452	0.0687	0.172209	-0.21239	0.0801	0.193477	-0.1042	0.3842	0.578842	-0.0601036	0.6161	0.77104	-0.0894708	0.45895	0.647586	0.108191	0.36835	0.563352	0.152287	0.2089	0.386904	0.12292	0.3085	0.501974
MAC_00276	Uncharacterized protein	321.489	11.5826	282.038	7.23523	242.131	17.2605	262.947	12.2105	264.627	12.4438	278.668	21.5019	-0.188875	0.1184	0.257823	-0.40898	0.00075	0.00413583	-0.289996	0.01555	0.0535233	-0.280809	0.01885	0.0625197	-0.206221	0.08745	0.206474	-0.220104	0.07175	0.177912	-0.101121	0.40515	0.599048	-0.0919339	0.44725	0.637124	-0.0173461	0.889	0.943472	0.118983	0.3218	0.516436	0.12817	0.28295	0.474164	0.202758	0.0894	0.209887
MAC_00277	Uncharacterized protein	35.4626	0.666279	34.0655	2.26103	30.6001	1.95028	23.213	3.47057	26.4676	0.816127	26.9152	2.22766	-0.0579858	0.6461	0.792642	-0.212759	0.09515	0.219865	-0.611364	5e-05	0.000362775	-0.42207	0.00105	0.00553695	-0.397874	0.0015	0.00754603	-0.154773	0.22345	0.405227	-0.553378	5e-05	0.000362775	-0.364084	0.0046	0.0195686	-0.339888	0.0087	0.0333083	-0.398605	0.00245	0.0114878	-0.209311	0.10145	0.230497	-0.185115	0.1473	0.302129
MAC_00278	Uncharacterized protein	22.7726	4.61788	25.0721	11.839	21.4296	6.59273	18.6746	4.11638	21.1456	7.70072	15.9767	4.58036	0.138784	0.35115	0.546606	-0.0876902	0.5543	0.725275	-0.286218	0.05645	0.148317	-0.106941	0.474	0.660797	-0.511331	0.0016	0.00797782	-0.226474	0.1338	0.282111	-0.425002	0.0051	0.0213209	-0.245725	0.10545	0.237062	-0.650115	0.0001	0.000686749	-0.198528	0.19595	0.369984	-0.0192513	0.89755	0.948183	-0.423641	0.0074	0.0291602
MAC_00279	Mannitol-1-phosphate 5-dehydrogenase	1943.61	120.826	1143.05	205.986	350.384	7.83425	165.811	24.7887	166.715	14.5019	164.252	16.2565	-0.765857	0.00015	0.000993023	-2.47173	5e-05	0.000362775	-3.55113	5e-05	0.000362775	-3.54329	5e-05	0.000362775	-3.56476	5e-05	0.000362775	-1.70587	5e-05	0.000362775	-2.78528	5e-05	0.000362775	-2.77743	5e-05	0.000362775	-2.7989	5e-05	0.000362775	-1.0794	5e-05	0.000362775	-1.07156	5e-05	0.000362775	-1.09303	5e-05	0.000362775
MAC_00280	Glucose-6-phosphate isomerase	229.294	5.56756	226.862	25.9623	250.144	9.11202	206.59	8.2629	171.627	6.83464	199.305	10.6823	-0.0153801	0.9048	0.952115	0.125565	0.3289	0.523952	-0.150424	0.23185	0.415567	-0.417916	0.00065	0.00364841	-0.202222	0.1136	0.250293	0.140945	0.26965	0.459242	-0.135044	0.27845	0.469125	-0.402536	0.0013	0.00666464	-0.186842	0.138	0.288324	-0.275989	0.0296	0.08992	-0.543481	5e-05	0.000362775	-0.327787	0.00995	0.0371811
MAC_00281	Serine/threonine-protein kinase gad8	100.627	4.75411	102.475	12.0922	104.275	2.922	75.5419	4.16948	78.9003	3.32127	81.3275	4.80116	0.0262495	0.8231	0.905733	0.0513801	0.6732	0.811496	-0.413668	0.0007	0.00389376	-0.350914	0.0036	0.0159129	-0.307201	0.01215	0.0437215	0.0251306	0.8367	0.913341	-0.439918	0.0002	0.00128619	-0.377164	0.00205	0.00987573	-0.333451	0.00565	0.0232885	-0.465048	0.0001	0.000686749	-0.402294	0.00065	0.00364841	-0.358582	0.0033	0.0147896
MAC_00282	Coatomer subunit beta'	221.231	4.97801	190.55	2.27449	184.216	3.57509	179.204	9.41312	187.889	5.00588	175.436	12.1439	-0.215382	0.1052	0.236641	-0.264154	0.04795	0.130861	-0.30395	0.02175	0.0701524	-0.235673	0.0787	0.19084	-0.334614	0.0115	0.0418227	-0.0487718	0.703	0.83166	-0.088568	0.4978	0.680543	-0.0202917	0.8779	0.93728	-0.119232	0.35555	0.550645	-0.0397962	0.75815	0.866968	0.02848	0.8285	0.90871	-0.0704607	0.58795	0.750353
MAC_00283	Uncharacterized protein	0	0	0	0	0	0	0.25947	0.449416	0.184335	0.319278	0.208154	0.360534	0	1	1	0	1	1	inf	1	1	inf	1	1	inf	1	1	0	1	1	inf	1	1	inf	1	1	inf	1	1	inf	1	1	inf	1	1	inf	1	1
MAC_00284	Protein kinase domain-containing protein	10.2937	0.736893	11.0333	2.08404	11.2955	0.51695	12.6641	1.22066	12.9377	0.211432	12.1581	1.10952	0.100103	0.5818	0.745916	0.133992	0.46055	0.648931	0.298993	0.09215	0.21467	0.329828	0.0603	0.156092	0.240166	0.1754	0.342067	0.0338892	0.85145	0.922218	0.19889	0.26815	0.457552	0.229726	0.1966	0.37088	0.140063	0.43215	0.623544	0.165001	0.3507	0.546185	0.195836	0.26115	0.449839	0.106174	0.542	0.715667
MAC_00285	MFS transporter	65.057	1.19273	69.887	2.98286	71.5079	2.58971	63.2518	7.0325	75.335	4.77578	71.9563	2.79316	0.103321	0.42065	0.613115	0.136398	0.2843	0.475741	-0.0405975	0.75445	0.864763	0.211616	0.0953	0.220072	0.145416	0.25885	0.447065	0.0330769	0.79285	0.888002	-0.143918	0.2556	0.443267	0.108296	0.3912	0.585856	0.0420952	0.7423	0.857049	-0.176995	0.1637	0.32604	0.0752187	0.5547	0.725546	0.0090183	0.94295	0.972023
MAC_00286	DNA-directed RNA polymerase subunit	47.045	4.06126	42.7425	6.63699	39.5896	4.63456	46.9147	6.98891	45.463	3.08674	47.3536	4.52318	-0.138372	0.24815	0.434752	-0.248922	0.0403	0.114435	-0.00400194	0.9728	0.986065	-0.0493507	0.68715	0.821224	0.00943054	0.93755	0.969348	-0.11055	0.35935	0.554308	0.13437	0.26605	0.455148	0.0890212	0.4642	0.652228	0.147802	0.22125	0.402534	0.24492	0.04285	0.120087	0.199572	0.0973	0.223472	0.258353	0.034	0.100271
MAC_00287	Penicillin-binding protein, putative	0.110001	0.101626	0.396111	0.211093	0.454084	0.231745	0.396492	0.0836475	0.394601	0.119535	0.520771	0.15811	1.84839	1	1	2.04545	1	1	1.84978	1	1	1.84288	1	1	2.24314	1	1	0.197056	1	1	0.00138843	1	1	-0.00550844	1	1	0.394744	1	1	-0.195668	1	1	-0.202564	1	1	0.197688	1	1
MAC_00288	Uncharacterized protein	0	0	0	0	0.654979	1.13446	0	0	0.558627	0.96757	0	0	0	1	1	inf	1	1	0	1	1	inf	1	1	0	1	1	inf	1	1	0	1	1	inf	1	1	0	1	1	#NAME?	1	1	-0.229561	1	1	#NAME?	1	1
MAC_00289	DDHD domain-containing protein	30.5817	0.377581	25.94	4.65408	14.3116	0.886926	12.5885	0.441036	12.7953	0.498866	13.1927	0.526024	-0.237489	0.0537	0.142819	-1.09548	5e-05	0.000362775	-1.28056	5e-05	0.000362775	-1.25705	5e-05	0.000362775	-1.21293	5e-05	0.000362775	-0.857991	5e-05	0.000362775	-1.04307	5e-05	0.000362775	-1.01956	5e-05	0.000362775	-0.975445	5e-05	0.000362775	-0.185081	0.1825	0.351773	-0.161569	0.242	0.427595	-0.117454	0.39095	0.585587
MAC_00290	Uncharacterized protein	70.6917	0.240645	67.9172	5.05963	43.2722	10.2073	55.4234	4.66909	58.5033	2.25432	62.6183	3.03547	-0.0577637	0.6751	0.812873	-0.708099	5e-05	0.000362775	-0.351045	0.013	0.0462004	-0.273023	0.0515	0.138319	-0.174957	0.20845	0.386306	-0.650335	5e-05	0.000362775	-0.293281	0.0361	0.105077	-0.215259	0.1218	0.263128	-0.117193	0.3971	0.591312	0.357053	0.01525	0.0526567	0.435075	0.0031	0.0140312	0.533141	0.0003	0.00184856
MAC_00291	von Willebrand domain containing protein	1.54017	0.541719	1.2563	0.245159	1.94832	0.117074	1.90749	0.222484	1.64077	0.380197	1.74594	0.206498	-0.293903	0.27795	0.4686	0.339144	0.18175	0.350735	0.308593	0.22695	0.409433	0.0912893	0.7236	0.845468	0.180914	0.4888	0.672986	0.633047	0.01795	0.060126	0.602496	0.0242	0.0765331	0.385192	0.15135	0.308009	0.474817	0.0766	0.18699	-0.0305511	0.904	0.951708	-0.247854	0.329	0.524058	-0.158229	0.53105	0.707137
MAC_00292	WD domain containing protein	60.6063	6.52449	80.9479	12.4918	86.8464	3.87967	73.6327	4.59673	73.75	4.86329	83.1399	8.91266	0.417527	0.0013	0.00666464	0.518999	0.00015	0.000993023	0.280879	0.0294	0.0894566	0.283176	0.0288	0.0879838	0.456074	0.00035	0.00212064	0.101472	0.4201	0.612586	-0.136648	0.28285	0.474048	-0.13435	0.28715	0.4789	0.0385475	0.76245	0.869586	-0.23812	0.057	0.149468	-0.235822	0.05825	0.152016	-0.0629246	0.60925	0.766252
MAC_00293	Phospholipase A-2-activating protein	71.9582	4.27396	77.927	9.56246	86.9509	5.11674	53.8151	1.39131	55.0471	2.87313	53.5236	5.22828	0.114965	0.34095	0.5365	0.273041	0.0225	0.0720819	-0.41915	0.0008	0.00436954	-0.386494	0.00175	0.00861936	-0.426985	0.00035	0.00212064	0.158076	0.1923	0.365081	-0.534114	5e-05	0.000362775	-0.501459	5e-05	0.000362775	-0.54195	5e-05	0.000362775	-0.692191	5e-05	0.000362775	-0.659535	5e-05	0.000362775	-0.700026	5e-05	0.000362775
MAC_00294	Uncharacterized protein	158.946	23.0617	182.01	38.646	260.293	14.7215	232.303	7.91164	321.642	37.627	314.278	14.2538	0.195478	0.11485	0.252305	0.711601	5e-05	0.000362775	0.54747	5e-05	0.000362775	1.01692	5e-05	0.000362775	0.983504	5e-05	0.000362775	0.516123	5e-05	0.000362775	0.351992	0.00415	0.0179363	0.821441	5e-05	0.000362775	0.788026	5e-05	0.000362775	-0.164131	0.17805	0.345826	0.305318	0.0113	0.0412618	0.271903	0.0258	0.0805228
MAC_00295	Uncharacterized protein	53.8514	10.9383	42.8296	5.71051	57.4002	0.853152	69.5487	6.877	67.9884	3.71288	69.4584	11.5132	-0.330374	0.03465	0.101722	0.0920722	0.54055	0.714488	0.36904	0.01145	0.0416909	0.336304	0.02445	0.0771786	0.367164	0.0134	0.0473448	0.422446	0.00715	0.028342	0.699414	5e-05	0.000362775	0.666678	5e-05	0.000362775	0.697538	5e-05	0.000362775	0.276967	0.05595	0.147283	0.244232	0.0969	0.2228	0.275092	0.0577	0.150922
MAC_00296	Cell wall glucanase, putative	65.1205	7.01318	78.8719	13.24	85.0845	8.32464	72.5596	4.28986	70.4362	4.32092	70.534	6.71471	0.2764	0.02565	0.0801693	0.385784	0.0013	0.00666464	0.156054	0.19775	0.372445	0.113205	0.3561	0.551201	0.115207	0.34485	0.540429	0.109384	0.3683	0.563296	-0.120346	0.3217	0.516336	-0.163195	0.1853	0.355589	-0.161193	0.18735	0.35839	-0.22973	0.0568	0.149048	-0.27258	0.02775	0.0853903	-0.270578	0.02565	0.0801693
MAC_00297	Mercuric reductase, putative	17.5609	4.22823	17.956	5.6301	19.5463	3.05589	11.3656	2.15864	10.9773	1.0839	9.78028	1.24339	0.0321004	0.82455	0.906527	0.154524	0.27325	0.463199	-0.6277	5e-05	0.000362775	-0.677846	5e-05	0.000362775	-0.844421	5e-05	0.000362775	0.122424	0.3874	0.58193	-0.6598	5e-05	0.000362775	-0.709947	5e-05	0.000362775	-0.876522	5e-05	0.000362775	-0.782224	5e-05	0.000362775	-0.832371	5e-05	0.000362775	-0.998946	5e-05	0.000362775
MAC_00298	Alpha-galactosidase A	3.18385	1.79272	2.58711	1.08557	2.15545	0.988802	1.28805	0.595912	3.47885	1.21803	1.64691	0.512329	-0.299432	0.60315	0.761667	-0.562785	0.38275	0.577399	-1.30558	0.0613	0.158164	0.127836	0.8147	0.900951	-0.951006	0.23195	0.415657	-0.263353	0.6924	0.824615	-1.00615	0.13505	0.28392	0.427269	0.4899	0.673941	-0.651574	0.4238	0.616154	-0.742794	0.3187	0.513069	0.690622	0.3225	0.517179	-0.388221	0.66045	0.802885
MAC_00300	Glycosyl hydrolase family 76	0	0	0	0	0	0	0.147835	0.256058	0	0	0	0	0	1	1	0	1	1	inf	1	1	0	1	1	0	1	1	0	1	1	inf	1	1	0	1	1	0	1	1	inf	1	1	0	1	1	0	1	1
MAC_00301	C2 domain protein	0.528747	0.151331	1.22343	0.179603	3.10984	0.665377	3.50969	1.11666	0.484118	0.149448	0.103554	0.0143245	1.21028	0.0006	0.00340137	2.55619	5e-05	0.000362775	2.73069	5e-05	0.000362775	-0.127219	1	1	-2.3522	1	1	1.34591	5e-05	0.000362775	1.52041	5e-05	0.000362775	-1.3375	0.0003	0.00184856	-3.56248	0.0048	0.0202711	0.174501	0.36955	0.564514	-2.68341	5e-05	0.000362775	-4.90839	0.00265	0.0122799
MAC_00302	C2 domain protein	0.487567	0.197143	0.767486	0.262548	1.86111	0.638775	1.42654	0.474692	0.190914	0.0967163	0.0495055	0.0243726	0.654539	1	1	1.93249	5e-05	0.000362775	1.54885	5e-05	0.000362775	-1.35268	1	1	-3.29994	1	1	1.27795	5e-05	0.000362775	0.894313	0.0011	0.00576616	-2.00722	1	1	-3.95448	1	1	-0.383635	0.0833	0.1992	-3.28517	5e-05	0.000362775	-5.23243	0.04575	0.126241
MAC_00303	Phosphotransferase family protein	19.6565	3.29603	21.9702	1.97451	22.2455	2.59556	17.747	2.67566	18.6641	0.931362	19.5386	2.86951	0.160538	0.26885	0.458337	0.178508	0.21985	0.400778	-0.147432	0.3257	0.520614	-0.0747443	0.6151	0.770432	-0.0086787	0.95325	0.976831	0.0179696	0.9017	0.950533	-0.30797	0.03715	0.107492	-0.235283	0.1089	0.242791	-0.169217	0.24885	0.435555	-0.32594	0.0296	0.08992	-0.253252	0.08515	0.202461	-0.187187	0.20445	0.381118
MAC_00304	Uncharacterized protein	0	0	0.0436621	0.0756248	0	0	0	0	0	0	0	0	inf	1	1	0	1	1	0	1	1	0	1	1	0	1	1	#NAME?	1	1	#NAME?	1	1	#NAME?	1	1	#NAME?	1	1	0	1	1	0	1	1	0	1	1
MAC_00305	MYND finger family protein	19.2187	2.19134	17.5593	0.128284	9.65567	0.756216	8.38258	0.164218	7.6381	0.577658	7.60128	0.286365	-0.130283	0.34385	0.53944	-0.993066	5e-05	0.000362775	-1.19705	5e-05	0.000362775	-1.33123	5e-05	0.000362775	-1.3382	5e-05	0.000362775	-0.862783	5e-05	0.000362775	-1.06677	5e-05	0.000362775	-1.20095	5e-05	0.000362775	-1.20792	5e-05	0.000362775	-0.203983	0.20355	0.379964	-0.338163	0.03975	0.113264	-0.345135	0.0377	0.108704
MAC_00306	CrcB-like protein	96.6095	2.71163	96.6906	12.4688	64.8641	6.5024	42.7886	4.95122	47.9461	1.98147	42.0069	1.60134	0.00121	0.99325	0.995755	-0.574744	5e-05	0.000362775	-1.17494	5e-05	0.000362775	-1.01075	5e-05	0.000362775	-1.20154	5e-05	0.000362775	-0.575954	5e-05	0.000362775	-1.17615	5e-05	0.000362775	-1.01196	5e-05	0.000362775	-1.20275	5e-05	0.000362775	-0.600196	5e-05	0.000362775	-0.436006	0.00075	0.00413583	-0.626793	5e-05	0.000362775
MAC_00307	Uracil phosphoribosyltransferase	110.626	9.67527	126.245	21.2112	140.433	30.2876	89.0852	4.79809	66.8979	8.8165	68.3604	6.47541	0.190542	0.1388	0.289543	0.344194	0.00745	0.0293182	-0.312432	0.01715	0.0579234	-0.725656	5e-05	0.000362775	-0.694457	5e-05	0.000362775	0.153653	0.2255	0.407727	-0.502973	0.0002	0.00128619	-0.916198	5e-05	0.000362775	-0.884999	5e-05	0.000362775	-0.656626	5e-05	0.000362775	-1.06985	5e-05	0.000362775	-1.03865	5e-05	0.000362775
MAC_00308	DNA ligase	31.3233	1.10015	40.4861	3.27392	45.3557	5.04625	28.6689	1.62766	29.0379	1.48062	25.4645	0.111752	0.37019	0.0023	0.0108941	0.534047	5e-05	0.000362775	-0.127749	0.29655	0.489214	-0.109301	0.3673	0.562271	-0.298749	0.01605	0.0549403	0.163857	0.1829	0.352375	-0.497939	0.0002	0.00128619	-0.479491	0.00025	0.00157207	-0.668939	5e-05	0.000362775	-0.661796	5e-05	0.000362775	-0.643348	5e-05	0.000362775	-0.832796	5e-05	0.000362775
MAC_00309	Uncharacterized protein	9.1621	0.712082	9.28314	0.630488	9.14026	0.701911	9.62102	0.484381	9.644	1.45049	8.67339	0.943935	0.0189353	0.91815	0.959107	-0.0034429	0.98655	0.992604	0.0705112	0.70515	0.833071	0.0739535	0.6931	0.825015	-0.0790825	0.67475	0.812601	-0.0223782	0.9053	0.952376	0.0515759	0.7811	0.880836	0.0550183	0.7685	0.873123	-0.0980177	0.6055	0.763379	0.0739541	0.7003	0.829854	0.0773964	0.686	0.820456	-0.0756396	0.69615	0.827181
MAC_00310	Uncharacterized protein	7.27292	0.320848	7.34645	0.407548	8.2576	0.370272	8.6589	0.581799	7.90103	0.236153	7.82919	0.394124	0.0145121	0.92035	0.960196	0.183188	0.20165	0.377624	0.251649	0.08175	0.196464	0.119505	0.41025	0.603576	0.106327	0.4627	0.650819	0.168676	0.23975	0.42479	0.237137	0.0994	0.227088	0.104993	0.46595	0.653764	0.0918153	0.5218	0.699716	0.0684607	0.62895	0.780342	-0.0636828	0.6513	0.796501	-0.0768609	0.58625	0.749098
MAC_00311	Uncharacterized protein	0.203227	0.235314	0.272586	0.139028	0.418874	0.115251	0.206457	0.211695	0.339119	0.305537	0.45421	0.319288	0.423621	1	1	1.04342	1	1	0.022747	1	1	0.738698	1	1	1.16027	1	1	0.619802	1	1	-0.400874	1	1	0.315078	1	1	0.736646	1	1	-1.02068	1	1	-0.304724	1	1	0.116844	1	1
MAC_00312	Sulfatase domain protein	52.7395	3.50894	101.489	13.0741	88.749	1.65084	61.6105	3.31619	56.961	1.26784	67.2421	3.77477	0.944376	5e-05	0.000362775	0.750848	5e-05	0.000362775	0.224294	0.0674	0.169771	0.111091	0.3631	0.55799	0.350482	0.00475	0.0200933	-0.193528	0.11115	0.246382	-0.720082	5e-05	0.000362775	-0.833284	5e-05	0.000362775	-0.593893	5e-05	0.000362775	-0.526554	5e-05	0.000362775	-0.639757	5e-05	0.000362775	-0.400366	0.0012	0.00621755
MAC_00313	Uncharacterized protein	13.9101	1.10315	18.155	1.23008	15.7373	0.24802	12.4052	0.534951	12.8849	1.95399	14.6342	1.11561	0.38424	0.0122	0.0438596	0.178061	0.2488	0.43551	-0.165182	0.2972	0.489884	-0.110446	0.4829	0.668256	0.0732126	0.64075	0.788761	-0.206179	0.16625	0.329589	-0.549423	0.0004	0.00238366	-0.494686	0.0013	0.00666464	-0.311028	0.0397	0.113155	-0.343243	0.02725	0.0841493	-0.288507	0.06245	0.160397	-0.104848	0.4961	0.679137
MAC_00314	GTP cyclohydrolase 1	7.15958	0.134068	10.8875	2.17116	8.1086	1.67365	9.35849	1.96588	6.26986	0.767026	7.99494	0.687914	0.604727	0.0033	0.0147896	0.179577	0.38125	0.575813	0.386401	0.05675	0.148942	-0.191441	0.36845	0.563428	0.159212	0.44235	0.632606	-0.42515	0.02985	0.0905182	-0.218326	0.2561	0.443843	-0.796168	0.00015	0.000993023	-0.445515	0.02385	0.0756126	0.206824	0.29465	0.487139	-0.371018	0.07755	0.188754	-0.020365	0.91695	0.958643
MAC_00315	Purple acid phosphatase	1.14445	0.244564	2.0585	0.715521	2.78135	0.819708	3.14199	0.768393	3.49481	0.74085	2.51311	0.605739	0.846938	0.01055	0.039005	1.28113	0.00015	0.000993023	1.45702	5e-05	0.000362775	1.61056	5e-05	0.000362775	1.13482	0.001	0.00530838	0.434195	0.0924	0.215124	0.610085	0.01885	0.0625197	0.763621	0.00375	0.0164672	0.287881	0.2723	0.462205	0.17589	0.4678	0.655289	0.329426	0.1648	0.327455	-0.146314	0.55505	0.725844
MAC_00316	Amino-acid permease inda1	20.7665	0.317226	16.3938	2.41189	26.1628	3.01484	38.6563	1.24645	55.8044	3.40376	39.0791	4.18409	-0.341115	0.01915	0.0633054	0.333255	0.01675	0.0568269	0.896444	5e-05	0.000362775	1.42612	5e-05	0.000362775	0.912135	5e-05	0.000362775	0.67437	5e-05	0.000362775	1.23756	5e-05	0.000362775	1.76723	5e-05	0.000362775	1.25325	5e-05	0.000362775	0.563189	5e-05	0.000362775	1.09286	5e-05	0.000362775	0.57888	5e-05	0.000362775
MAC_00317	MFS transporter, putative	0.25625	0.144143	0.41218	0.52392	0.296025	0.424585	0.0801755	0.138868	0.520515	0.153856	0.295946	0.176456	0.685718	1	1	0.208163	1	1	-1.67632	1	1	1.02239	1	1	0.207781	1	1	-0.477555	1	1	-2.36204	1	1	0.336668	1	1	-0.477938	1	1	-1.88448	1	1	0.814223	1	1	-0.000382218	1	1
MAC_00318	Gas1-like protein	0.0424954	0.0736041	0.166582	0.184769	0.07615	0.0663014	0.0901627	0.078245	0.159941	0.144672	0.120894	0.114425	1.97085	1	1	0.841536	1	1	1.08522	1	1	1.91216	1	1	1.50837	1	1	-1.12931	1	1	-0.885625	1	1	-0.0586898	1	1	-0.462484	1	1	0.243688	1	1	1.07062	1	1	0.66683	1	1
MAC_00319	Uncharacterized protein	1.05965	0.75517	1.34064	0.6958	2.06512	0.26354	3.37259	0.720595	2.35478	0.989414	2.84309	0.426043	0.339326	0.4895	0.673614	0.962637	0.04285	0.120087	1.67026	0.0016	0.00797782	1.152	0.01865	0.0620051	1.42387	0.0051	0.0213209	0.623311	0.128	0.273155	1.33094	0.00335	0.0149749	0.812674	0.05025	0.135721	1.08454	0.0121	0.0435681	0.707628	0.0397	0.113155	0.189364	0.59535	0.755921	0.461232	0.1845	0.354442
MAC_00320	Adenylosuccinate lyase	503.738	22.5315	439.565	27.1927	403.62	43.4646	434.03	23.8421	483.223	38.6332	510.969	33.0424	-0.196599	0.144	0.297197	-0.319677	0.019	0.0629132	-0.214881	0.10965	0.243987	-0.0599842	0.657	0.800443	0.0205609	0.88175	0.939499	-0.123078	0.3612	0.556087	-0.0182821	0.88965	0.943819	0.136615	0.31785	0.512105	0.21716	0.1084	0.241972	0.104796	0.4289	0.62074	0.259693	0.0557	0.146758	0.340238	0.01355	0.0477906
MAC_00321	Uncharacterized protein	0.0320102	0.0554434	0.0436213	0.0755544	0.0348384	0.0603418	0	0	0	0	0.0438523	0.0759545	0.446499	1	1	0.122145	1	1	#NAME?	1	1	#NAME?	1	1	0.45412	1	1	-0.324354	1	1	#NAME?	1	1	#NAME?	1	1	0.00762147	1	1	#NAME?	1	1	#NAME?	1	1	0.331975	1	1
MAC_00322	NADPH-dependent alpha-keto amide reductase, putative	0	0	0.163495	0.283182	0	0	0	0	0	0	0	0	inf	1	1	0	1	1	0	1	1	0	1	1	0	1	1	#NAME?	1	1	#NAME?	1	1	#NAME?	1	1	#NAME?	1	1	0	1	1	0	1	1	0	1	1
MAC_00323	Ankyrin 2,3/unc44	4.68932	0.578631	8.02831	1.46991	4.63868	0.325255	7.32991	1.24739	6.34973	0.653056	7.27335	1.37466	0.775719	0.0001	0.000686749	-0.015664	0.93065	0.965664	0.644417	0.00055	0.00315471	0.437317	0.01915	0.0633054	0.633242	0.0005	0.0029	-0.791383	0.0001	0.000686749	-0.131302	0.4384	0.629177	-0.338401	0.0519	0.139138	-0.142477	0.39825	0.592365	0.660081	0.00055	0.00315471	0.452981	0.01455	0.0506656	0.648906	0.0005	0.0029
MAC_00324	Ankyrin	0.0246152	0.0426348	0	0	0	0	0.0699544	0.121164	0.0326954	0.0566302	0	0	#NAME?	1	1	#NAME?	1	1	1.50686	1	1	0.409538	1	1	#NAME?	1	1	0	1	1	inf	1	1	inf	1	1	0	1	1	inf	1	1	inf	1	1	0	1	1
MAC_00325	Heat Labile Enterotoxin Type Iib	0.578511	0.180257	0.520308	0.322595	0.405634	0.1381	0.311365	0.130255	0.466697	0.146341	0.655441	0.0610502	-0.152979	1	1	-0.512167	1	1	-0.89374	1	1	-0.309858	1	1	0.180122	1	1	-0.359188	1	1	-0.740761	1	1	-0.156879	1	1	0.3331	1	1	-0.381573	1	1	0.202309	1	1	0.692288	1	1
MAC_00326	MATE efflux family protein subfamily, putative	0.0401264	0.0695008	0.0495276	0.0857844	0.101359	0.0878885	0.131883	0.117276	0.114556	0.198416	0.110403	0.0956145	0.303679	1	1	1.33685	1	1	1.71664	1	1	1.51343	1	1	1.46015	1	1	1.03317	1	1	1.41296	1	1	1.20975	1	1	1.15647	1	1	0.379783	1	1	0.176573	1	1	0.1233	1	1
MAC_00327	Agmatinase	46.058	4.57958	54.4093	5.28298	38.8095	4.0915	47.5076	5.75556	40.704	2.7861	61.7736	6.18261	0.240401	0.08355	0.199633	-0.247042	0.08665	0.205075	0.0447048	0.7563	0.865847	-0.178283	0.21205	0.39101	0.423537	0.002	0.00967343	-0.487444	0.0011	0.00576616	-0.195696	0.16185	0.323406	-0.418684	0.0026	0.0120896	0.183136	0.17675	0.343972	0.291747	0.04405	0.122608	0.0687593	0.6339	0.784013	0.670579	5e-05	0.000362775
MAC_00328	Uncharacterized protein	0.24076	0.171667	0.147036	0.139487	0.227608	0.219581	0.222067	0.0693119	0.341294	0.205406	0.30068	0.166408	-0.711429	1	1	-0.0810443	1	1	-0.116604	1	1	0.503421	1	1	0.320634	1	1	0.630384	1	1	0.594825	1	1	1.21485	1	1	1.03206	1	1	-0.0355594	1	1	0.584465	1	1	0.401679	1	1
MAC_00329	General amidase	8.45303	0.925256	5.85536	0.249369	10.1685	1.44043	11.9561	1.88316	13.0134	1.59781	11.9397	1.44347	-0.52971	0.0044	0.0188499	0.266568	0.1184	0.257823	0.500202	0.0029	0.013262	0.622462	0.0002	0.00128619	0.498228	0.00325	0.0146008	0.796277	5e-05	0.000362775	1.02991	5e-05	0.000362775	1.15217	5e-05	0.000362775	1.02794	5e-05	0.000362775	0.233635	0.1518	0.308713	0.355894	0.02765	0.0851457	0.23166	0.1558	0.314499
MAC_00330	Uncharacterized protein	0.0986779	0.0413891	0.122467	0.0861157	0.143131	0.0698201	0.113011	0.0753252	0.099797	0.00618305	0.0592663	0.0519141	0.311592	1	1	0.536536	1	1	0.19566	1	1	0.0162701	1	1	-0.735514	1	1	0.224944	1	1	-0.115931	1	1	-0.295321	1	1	-1.04711	1	1	-0.340875	1	1	-0.520266	1	1	-1.27205	1	1
MAC_00331	Secreted protein	0.765056	0.715549	0.303255	0.320658	0.797829	0.309785	1.67706	1.11673	1.07101	0.117974	1.44832	0.600764	-1.33503	1	1	0.0605136	1	1	1.1323	0.16495	0.327701	0.485333	1	1	0.920739	0.2479	0.434509	1.39555	1	1	2.46733	0.0124	0.0444489	1.82037	1	1	2.25577	0.01765	0.0593047	1.07179	0.16255	0.324409	0.42482	1	1	0.860225	0.2608	0.449404
MAC_00332	Uncharacterized protein	17.777	1.33101	19.1474	2.24679	22.5703	6.08812	22.8759	1.09736	22.2614	4.84598	22.055	2.63396	0.107132	0.58155	0.745803	0.34441	0.0739	0.181902	0.36381	0.0611	0.157743	0.32453	0.0926	0.215469	0.311091	0.10935	0.243494	0.237278	0.2083	0.386097	0.256678	0.1747	0.341103	0.217398	0.24535	0.431535	0.203959	0.28455	0.476031	0.0194003	0.9122	0.956135	-0.0198802	0.91345	0.956768	-0.0333193	0.8618	0.928056
MAC_00333	Leukotriene A-4 hydrolase	128.52	7.01527	112.6	2.23259	111.09	11.4256	113.044	1.8607	108.706	8.54668	113.272	7.16651	-0.190786	0.1137	0.250442	-0.210265	0.08795	0.207406	-0.185102	0.12575	0.269495	-0.241558	0.0453	0.125269	-0.182196	0.13415	0.28261	-0.0194792	0.8734	0.934764	0.00568408	0.9614	0.980902	-0.0507721	0.6714	0.810307	0.00859022	0.94265	0.971835	0.0251633	0.83125	0.910298	-0.0312929	0.79445	0.88889	0.0280694	0.8163	0.901719
MAC_00334	Uncharacterized protein	167.402	11.6766	163.631	11.5307	145.733	5.3132	154.405	13.1785	152.654	8.77424	174.299	10.3784	-0.0328676	0.81865	0.903064	-0.199988	0.1551	0.313569	-0.116594	0.4085	0.602184	-0.133046	0.346	0.541488	0.0582476	0.677	0.814231	-0.167121	0.238	0.422754	-0.0837269	0.55265	0.724075	-0.100179	0.47805	0.664107	0.0911152	0.5146	0.69398	0.083394	0.5544	0.725322	0.0669423	0.63325	0.783575	0.258236	0.0696	0.173897
MAC_00335	Kinesin	16.6636	1.00989	14.1789	1.46789	14.1269	0.618939	14.8051	1.03742	14.9389	1.02136	14.8221	1.01996	-0.232953	0.06385	0.16314	-0.238254	0.05895	0.153386	-0.170611	0.1723	0.337848	-0.157625	0.20525	0.382123	-0.168955	0.17755	0.345086	-0.00530104	0.96485	0.98233	0.0623417	0.62205	0.775414	0.0753273	0.5477	0.720213	0.0639981	0.61335	0.769208	0.0676427	0.5878	0.750254	0.0806284	0.51745	0.696179	0.0692991	0.5787	0.74352
MAC_00336	TAM domain methyltransferase, putative	28.3462	1.23963	27.0186	2.17429	27.7402	1.672	23.9436	2.36621	26.4984	1.1624	26.627	2.60918	-0.069204	0.5904	0.752145	-0.0311795	0.80725	0.896401	-0.243516	0.0621	0.159702	-0.0972494	0.45415	0.643345	-0.0902645	0.48835	0.672619	0.0380245	0.7674	0.87251	-0.174312	0.1796	0.347924	-0.0280454	0.8302	0.909653	-0.0210605	0.86965	0.932603	-0.212337	0.10055	0.228929	-0.0660699	0.6099	0.76672	-0.059085	0.64725	0.793607
MAC_00337	Cytochrome b5, putative	167.793	30.9737	138.79	13.3928	151.622	8.02647	176.912	15.3545	144.802	15.908	172.493	16.5407	-0.273784	0.10235	0.232004	-0.146201	0.3845	0.579098	0.0763508	0.64405	0.791242	-0.2126	0.20355	0.379964	0.0398534	0.80335	0.893945	0.127583	0.45755	0.64638	0.350135	0.03785	0.109038	0.0611843	0.7199	0.843108	0.313638	0.06085	0.157225	0.222552	0.18475	0.354813	-0.0663991	0.6905	0.823353	0.186055	0.26355	0.45242
MAC_00338	Tyrosine decarboxylase, putative	17.4	1.23565	19.3374	3.20875	21.4997	2.76655	26.6725	0.502854	26.4497	1.39835	27.4721	2.53995	0.152306	0.2955	0.487993	0.30523	0.0337	0.0995772	0.616262	5e-05	0.000362775	0.604162	5e-05	0.000362775	0.658877	5e-05	0.000362775	0.152924	0.28615	0.477745	0.463955	0.0008	0.00436954	0.451856	0.00125	0.00644361	0.506571	0.00035	0.00212064	0.311031	0.024	0.0760126	0.298932	0.0311	0.0934367	0.353647	0.01085	0.0399256
MAC_00339	Protein kinase-like protein	44.2397	3.13385	48.8032	3.2012	51.7673	2.82542	39.9441	2.18182	44.4392	1.73893	45.0764	3.46607	0.141634	0.251	0.438067	0.226697	0.06705	0.16916	-0.14736	0.2349	0.419066	0.00649145	0.95765	0.979058	0.0270296	0.82295	0.905664	0.0850635	0.4933	0.676845	-0.288993	0.02115	0.0685833	-0.135142	0.2786	0.469289	-0.114604	0.35535	0.550527	-0.374057	0.0029	0.013262	-0.220206	0.07725	0.188186	-0.199668	0.1065	0.238836
MAC_00340	Uncharacterized protein	8.46419	0.432063	18.7766	1.6872	22.0304	2.19833	15.8885	0.766264	18.6481	1.60746	17.052	2.2001	1.14949	5e-05	0.000362775	1.38005	5e-05	0.000362775	0.908534	5e-05	0.000362775	1.13958	5e-05	0.000362775	1.0105	5e-05	0.000362775	0.230562	0.13545	0.284453	-0.240954	0.13445	0.283026	-0.00990389	0.9492	0.974892	-0.13899	0.37875	0.573492	-0.471516	0.00295	0.013463	-0.240466	0.11725	0.25605	-0.369552	0.01735	0.0584751
MAC_00341	Aconitate hydratase	73.269	4.02149	62.3942	3.58812	64.9301	5.43052	73.5787	1.0551	75.2654	4.07973	69.8867	3.45231	-0.23179	0.07185	0.178117	-0.174315	0.1749	0.341365	0.006086	0.9621	0.981189	0.0387852	0.7629	0.86981	-0.0681853	0.59535	0.755921	0.0574749	0.65355	0.798123	0.237876	0.06045	0.156412	0.270575	0.03335	0.0987329	0.163604	0.2034	0.379798	0.180401	0.15935	0.31973	0.2131	0.0967	0.222496	0.106129	0.40525	0.599146
MAC_00342	Uncharacterized protein	66.2248	0.918685	67.7306	5.53955	72.7823	1.52894	69.0595	3.02079	74.474	1.59495	73.8114	0.871014	0.0324367	0.7948	0.88913	0.136217	0.26905	0.458578	0.0604695	0.626	0.778062	0.169365	0.16775	0.331649	0.156473	0.20025	0.375709	0.10378	0.4017	0.59578	0.0280328	0.8235	0.906013	0.136929	0.26465	0.453607	0.124036	0.3135	0.507475	-0.0757472	0.54075	0.714639	0.0331487	0.7851	0.883337	0.0202561	0.8667	0.930892
MAC_00343	Zinc finger CCCH type domain containing protein	52.9149	3.23679	54.7614	4.12687	46.7607	2.35066	46.9927	3.812	47.6077	2.45951	47.3664	2.21039	0.0494858	0.7221	0.844469	-0.178377	0.19975	0.375071	-0.171237	0.22345	0.405227	-0.152479	0.27435	0.464507	-0.159809	0.25065	0.437677	-0.227862	0.1001	0.228201	-0.220723	0.11415	0.251126	-0.201965	0.14765	0.302612	-0.209295	0.13305	0.280954	0.0071397	0.95945	0.97994	0.0258976	0.85665	0.925184	0.0185675	0.8956	0.947063
MAC_00344	Methyltransferase LaeA-like, putative	77.6267	5.06838	85.9276	4.61858	97.97	2.97738	95.866	0.220046	91.9667	8.11724	91.0989	4.11512	0.146567	0.23545	0.419699	0.335786	0.0082	0.0316924	0.304465	0.01405	0.0492554	0.244558	0.04715	0.129159	0.230881	0.05985	0.155157	0.189219	0.1321	0.279545	0.157898	0.20425	0.380854	0.0979906	0.4239	0.616249	0.0843132	0.4956	0.678781	-0.0313215	0.80145	0.892877	-0.0912286	0.45605	0.645082	-0.104906	0.38825	0.582785
MAC_00345	Chitinase 18-3	3.18173	0.650371	3.23461	0.415388	2.73694	0.361125	3.38119	0.474328	3.93685	1.31967	4.17394	0.384701	0.0237828	0.9124	0.956215	-0.217249	0.43295	0.624221	0.0877194	0.73975	0.855407	0.307231	0.24225	0.427909	0.3916	0.1331	0.281002	-0.241032	0.3753	0.570238	0.0639366	0.8066	0.896039	0.283449	0.27585	0.466228	0.367817	0.1587	0.318776	0.304968	0.261	0.449649	0.524481	0.05315	0.141714	0.608849	0.0258	0.0805228
MAC_00346	Uncharacterized protein	33.9895	2.96201	36.3117	2.85643	31.6513	3.50384	32.8009	5.46412	34.5068	0.902807	26.3392	5.6523	0.0953469	0.53355	0.708986	-0.102826	0.51565	0.694764	-0.0513507	0.74725	0.860171	0.021792	0.8871	0.942464	-0.367878	0.02555	0.079925	-0.198173	0.20615	0.383317	-0.146698	0.3464	0.541889	-0.0735549	0.6354	0.785088	-0.463225	0.00455	0.019383	0.051475	0.7491	0.861257	0.124618	0.43115	0.622672	-0.265053	0.11125	0.246542
MAC_00347	t-SNARE protein	157.602	2.54983	145.78	14.5926	153.956	6.34198	169.516	6.49619	173.912	19.1153	153.405	11.1032	-0.112484	0.35895	0.553897	-0.0337656	0.7844	0.882965	0.105141	0.3855	0.580112	0.142079	0.2377	0.42239	-0.0389351	0.7534	0.864013	0.0787189	0.5216	0.699576	0.217626	0.074	0.182079	0.254563	0.03495	0.102432	0.0735494	0.54985	0.721927	0.138907	0.2583	0.446468	0.175844	0.14645	0.300886	-0.0051695	0.9669	0.983272
MAC_00348	DUF52 domain-containing protein	82.4782	9.64556	73.7376	10.7902	117.824	18.6904	89.1444	5.25022	96.8081	10.4043	86.4678	10.7252	-0.161612	0.2092	0.387287	0.514546	5e-05	0.000362775	0.112131	0.37485	0.569819	0.231114	0.06395	0.163312	0.0681489	0.5921	0.753486	0.676158	5e-05	0.000362775	0.273743	0.0334	0.098848	0.392726	0.00195	0.00946249	0.229761	0.06995	0.174551	-0.402414	0.00125	0.00644361	-0.283432	0.02215	0.0711603	-0.446397	0.0005	0.0029
MAC_00349	H/ACA ribonucleoprotein complex subunit	425.513	5.22205	368.506	49.5398	301.549	44.0602	435.472	23.6401	446.829	6.22407	468.029	39.1808	-0.207514	0.08465	0.20158	-0.49681	5e-05	0.000362775	0.0333743	0.7854	0.883507	0.0705174	0.5634	0.732269	0.137392	0.2584	0.446579	-0.289296	0.01715	0.0579234	0.240889	0.04785	0.130662	0.278032	0.02115	0.0685833	0.344907	0.0054	0.0223998	0.530185	5e-05	0.000362775	0.567328	5e-05	0.000362775	0.634203	5e-05	0.000362775
MAC_00350	Zinc homeostasis factor 1	100.104	6.533	133.41	24.0376	91.9762	6.19368	70.6615	5.61121	70.3052	2.52433	67.7997	6.71659	0.414371	0.00095	0.00507718	-0.122164	0.31505	0.508951	-0.5025	5e-05	0.000362775	-0.509793	5e-05	0.000362775	-0.562145	5e-05	0.000362775	-0.536535	5e-05	0.000362775	-0.916871	5e-05	0.000362775	-0.924164	5e-05	0.000362775	-0.976516	5e-05	0.000362775	-0.380337	0.0017	0.00840203	-0.387629	0.0016	0.00797782	-0.439981	0.00025	0.00157207
MAC_00351	60S ribosomal protein L28	2588.25	102.568	2451.64	155.078	2088.67	127.206	2092.77	101.568	1962.19	105.134	2372.86	217.994	-0.0782264	0.586	0.748932	-0.309393	0.03055	0.0921111	-0.306561	0.0301	0.0910721	-0.399511	0.0051	0.0213209	-0.125349	0.3769	0.571741	-0.231166	0.1022	0.231765	-0.228334	0.1034	0.233673	-0.321284	0.02405	0.0761497	-0.0471229	0.7436	0.857898	0.00283199	0.9856	0.992282	-0.0901178	0.5138	0.693382	0.184044	0.18975	0.361669
MAC_00352	Protein	143.832	4.7731	124.759	22.8877	85.1238	5.44572	70.9177	5.66528	83.3584	4.71086	88.2342	7.2384	-0.205239	0.15215	0.309233	-0.75675	5e-05	0.000362775	-1.02017	5e-05	0.000362775	-0.786985	5e-05	0.000362775	-0.704975	5e-05	0.000362775	-0.551511	0.0005	0.0029	-0.814929	5e-05	0.000362775	-0.581746	0.00015	0.000993023	-0.499736	0.001	0.00530838	-0.263418	0.10405	0.234805	-0.0302354	0.84875	0.920672	0.0517745	0.7385	0.854565
MAC_00353	C-5 sterol desaturase	260.939	24.4713	255.42	74.1325	243.282	23.3389	261.503	32.9782	277.578	25.4871	270.356	27.1048	-0.0308387	0.80385	0.894277	-0.101084	0.40315	0.597176	0.00311756	0.9788	0.988892	0.0891817	0.4658	0.653642	0.0511518	0.67225	0.810861	-0.070245	0.5709	0.737856	0.0339563	0.7879	0.884855	0.12002	0.3403	0.535877	0.0819905	0.51045	0.690554	0.104201	0.39445	0.588909	0.190265	0.1197	0.259854	0.152236	0.21435	0.393943
MAC_00354	Uncharacterized protein	318.677	12.4303	261.404	25.8097	311.218	18.3442	304.944	14.951	343.01	13.1341	277.128	16.1585	-0.285814	0.03185	0.0952255	-0.0341683	0.8013	0.892813	-0.0635502	0.63455	0.784411	0.106157	0.43555	0.626641	-0.201541	0.1318	0.279148	0.251646	0.05935	0.154162	0.222264	0.09515	0.219865	0.391971	0.00425	0.0183056	0.0842727	0.51925	0.697688	-0.0293819	0.82565	0.907063	0.140325	0.2972	0.489884	-0.167373	0.2095	0.387646
MAC_00355	Uncharacterized protein	38.6776	3.68135	41.0562	4.40007	39.3493	1.78151	39.2697	3.90357	52.3082	6.88266	41.4396	2.37855	0.0861004	0.58215	0.746157	0.0248394	0.8747	0.935488	0.0219149	0.88705	0.942451	0.435536	0.0046	0.0195686	0.0995109	0.52375	0.701152	-0.061261	0.697	0.827757	-0.0641855	0.677	0.814231	0.349436	0.01895	0.0627794	0.0134105	0.93145	0.966099	-0.00292454	0.9869	0.992732	0.410697	0.00695	0.0277009	0.0746715	0.62625	0.778264
MAC_00356	Psi protein	1117.53	31.8934	971.2	91.588	435.896	38.3121	296.981	37.9389	350.629	43.9566	312.455	3.95819	-0.202468	0.20135	0.377187	-1.35825	5e-05	0.000362775	-1.91187	5e-05	0.000362775	-1.67229	5e-05	0.000362775	-1.83859	5e-05	0.000362775	-1.15578	5e-05	0.000362775	-1.7094	5e-05	0.000362775	-1.46982	5e-05	0.000362775	-1.63612	5e-05	0.000362775	-0.553617	5e-05	0.000362775	-0.314038	0.01305	0.046341	-0.480339	0.0003	0.00184856
MAC_00357	Ubiquitin interaction domain-containing protein	63.3265	3.38173	56.0024	5.04837	43.7921	2.6872	43.1442	2.9929	44.8967	0.681521	44.2884	3.59739	-0.177319	0.15295	0.310413	-0.532138	5e-05	0.000362775	-0.553641	5e-05	0.000362775	-0.496197	5e-05	0.000362775	-0.515879	5e-05	0.000362775	-0.354819	0.00435	0.0186704	-0.376321	0.00295	0.013463	-0.318878	0.00985	0.0368694	-0.338559	0.00615	0.0249845	-0.0215027	0.8634	0.92904	0.0359405	0.7779	0.87878	0.0162593	0.8982	0.94862
MAC_00358	Uncharacterized protein	117.187	5.85436	93.1958	5.90357	115.052	3.51331	125.71	5.68874	135.65	3.92908	121.783	10.7066	-0.330478	0.00765	0.0299612	-0.026533	0.8301	0.909575	0.101281	0.40775	0.601449	0.211076	0.08915	0.209446	0.0555024	0.6562	0.799899	0.303945	0.01475	0.0512516	0.431759	0.0007	0.00389376	0.541554	5e-05	0.000362775	0.385981	0.002	0.00967343	0.127814	0.2992	0.492053	0.237609	0.05455	0.144546	0.0820354	0.5122	0.692011
MAC_00359	Uncharacterized protein	30.8068	1.07748	30.8627	5.73095	19.5011	6.9031	25.6252	4.36805	20.526	3.78275	27.1855	1.51692	0.00261756	0.9793	0.989157	-0.659689	0.0089	0.0339351	-0.265684	0.25015	0.437105	-0.585793	0.01705	0.0576482	-0.180412	0.43045	0.62213	-0.662307	0.0084	0.0323248	-0.268301	0.24375	0.429754	-0.588411	0.0166	0.0564334	-0.183029	0.42065	0.613115	0.394005	0.1195	0.259528	0.0738957	0.7759	0.877532	0.479277	0.0564	0.148223
MAC_00360	Uncharacterized protein	98.476	5.919	89.4165	5.98645	110.42	2.60369	109.835	7.30209	110.955	6.25811	113.305	8.95408	-0.139231	0.2586	0.446801	0.165157	0.1753	0.341909	0.15749	0.1963	0.37046	0.172134	0.15725	0.316589	0.202372	0.09925	0.226828	0.304387	0.01315	0.0466296	0.296721	0.0154	0.0530951	0.311364	0.01085	0.0399256	0.341602	0.00535	0.022219	-0.00766637	0.9516	0.976024	0.00697701	0.95545	0.977974	0.037215	0.7637	0.870307
MAC_00361	Dihydrouridine synthase family protein, putative	87.9565	2.81128	72.6588	11.766	56.6991	5.85819	81.4709	8.45298	82.874	1.46117	77.9093	3.86884	-0.275652	0.0252	0.0790527	-0.633464	5e-05	0.000362775	-0.110505	0.3644	0.559414	-0.0858705	0.4825	0.66794	-0.174994	0.15265	0.309976	-0.357812	0.00365	0.0161019	0.165147	0.1808	0.349503	0.189781	0.1205	0.26104	0.100658	0.4149	0.607816	0.522959	5e-05	0.000362775	0.547593	5e-05	0.000362775	0.45847	0.00015	0.000993023
MAC_00362	Uncharacterized protein	20.3384	6.20046	18.9122	1.76682	19.621	1.78045	19.4772	3.03579	17.3262	2.72626	24.4092	4.07469	-0.104891	0.59095	0.752568	-0.051805	0.79275	0.887978	-0.0624204	0.7468	0.859868	-0.231252	0.24095	0.426291	0.26322	0.1698	0.334511	0.0530859	0.78865	0.885266	0.0424706	0.8293	0.909163	-0.126361	0.51835	0.696968	0.368111	0.05365	0.142726	-0.0106153	0.9555	0.978001	-0.179447	0.36485	0.559801	0.315025	0.10055	0.228929
MAC_00363	Fungal specific transcription factor domain containing protein	0.888823	0.372894	1.41966	0.485386	1.10037	0.451349	1.73586	0.783831	0.654008	0.386082	1.22463	0.212713	0.675573	0.23525	0.419444	0.308015	1	1	0.96568	0.09605	0.221381	-0.442587	1	1	0.462383	0.4524	0.641867	-0.367558	0.4711	0.658207	0.290107	0.48545	0.670398	-1.11816	0.08715	0.205933	-0.21319	0.6538	0.798334	0.657665	0.19155	0.364035	-0.750602	1	1	0.154368	0.7817	0.881129
MAC_00364	Uncharacterized protein	0.408022	0.357806	1.47945	1.052	0.952232	0.323579	1.20928	0.431939	0.828726	0.408779	1.35555	0.923945	1.85835	0.1028	0.232761	1.22266	1	1	1.56743	1	1	1.02225	1	1	1.73216	0.1214	0.262482	-0.63568	0.3231	0.517761	-0.290915	0.6101	0.766856	-0.836098	0.14805	0.303168	-0.126182	0.80895	0.89756	0.344766	1	1	-0.200417	1	1	0.509499	0.4679	0.655325
MAC_00365	Beta-mannosidase	0.908282	0.168019	1.3655	0.0665077	1.03752	0.352924	1.17188	0.0564016	1.42531	0.365139	1.37063	0.220319	0.588221	0.08485	0.201925	0.191928	1	1	0.367607	1	1	0.650069	0.05575	0.146859	0.593631	0.0837	0.199899	-0.396293	0.2288	0.411714	-0.220614	0.4833	0.668557	0.0618481	0.83165	0.910504	0.00541038	0.962	0.981144	0.175679	1	1	0.458141	0.15765	0.317168	0.401703	0.22215	0.403682
MAC_00366	Cell cycle control protein (Cwf22)	51.0942	2.52787	46.3209	4.99901	50.7238	6.92397	57.3368	1.33846	55.4006	2.8542	55.7502	3.52235	-0.141494	0.24925	0.435991	-0.0104959	0.93355	0.967245	0.166304	0.17165	0.336934	0.116743	0.3371	0.532455	0.12582	0.3022	0.495356	0.130998	0.2847	0.476167	0.307798	0.01175	0.0425467	0.258237	0.03455	0.101496	0.267314	0.02825	0.0866183	0.1768	0.14805	0.303168	0.127239	0.2952	0.487717	0.136316	0.2628	0.45168
MAC_00367	Uncharacterized protein	0	0	0	0	0	0	0	0	0.132272	0.229102	0	0	0	1	1	0	1	1	0	1	1	inf	1	1	0	1	1	0	1	1	0	1	1	inf	1	1	0	1	1	0	1	1	inf	1	1	0	1	1
MAC_00368	Uncharacterized protein	0.888363	0.221842	1.09147	0.168028	1.57214	0.428455	1.74284	0.358565	1.62109	0.21436	1.10566	0.348042	0.297051	1	1	0.823511	0.0119	0.042991	0.972219	0.00365	0.0161019	0.86774	0.00935	0.0353423	0.315682	1	1	0.52646	0.07785	0.189314	0.675168	0.02405	0.0761497	0.570689	0.0583	0.152118	0.0186312	1	1	0.148708	0.58565	0.748685	0.0442292	0.87065	0.933073	-0.507829	0.0876	0.206738
MAC_00369	Dolichol phosphate mannosyltransferase subunit 2	228.161	3.42202	202.957	11.0575	251.577	10.5158	227.991	9.80301	268.56	15.128	240.3	9.80053	-0.168873	0.28755	0.479278	0.140949	0.36565	0.560607	-0.00107082	0.99205	0.995177	0.235192	0.1266	0.270915	0.0747857	0.636	0.785486	0.309822	0.0496	0.134362	0.167802	0.29145	0.483499	0.404065	0.00945	0.0356434	0.243659	0.12535	0.268892	-0.14202	0.3623	0.557077	0.0942427	0.5348	0.709972	-0.0661635	0.67025	0.809673
MAC_00370	Uncharacterized protein	17.9545	2.401	22.6936	4.31988	26.508	1.48423	16.0617	0.307525	16.3279	0.468599	18.0959	1.75563	0.337946	0.008	0.031069	0.562086	5e-05	0.000362775	-0.16072	0.2094	0.387547	-0.137003	0.29	0.481974	0.011322	0.9307	0.965708	0.22414	0.0719	0.178209	-0.498666	0.0001	0.000686749	-0.474949	0.00015	0.000993023	-0.326624	0.00895	0.0340924	-0.722806	5e-05	0.000362775	-0.699089	5e-05	0.000362775	-0.550764	5e-05	0.000362775
MAC_00371	PHD finger domain-containing protein	61.3611	4.8869	58.3308	3.41069	47.9334	2.23242	55.8259	2.6859	64.5403	7.34461	62.5577	5.20554	-0.0730675	0.54355	0.716839	-0.356294	0.003	0.0136591	-0.136389	0.2603	0.448791	0.0728759	0.5405	0.714468	0.0278633	0.81535	0.90123	-0.283227	0.02035	0.0665039	-0.0633215	0.60515	0.763116	0.145943	0.2296	0.412616	0.100931	0.4075	0.601215	0.219905	0.07125	0.177003	0.42917	0.0007	0.00389376	0.384158	0.0022	0.0104899
MAC_00372	Uncharacterized protein	35.5663	3.59162	38.6211	5.70556	36.0308	4.3118	45.6816	3.77716	41.9016	6.20668	32.5607	2.77443	0.11888	0.55625	0.726726	0.018719	0.9225	0.96144	0.361102	0.06445	0.164208	0.236496	0.22675	0.409196	-0.127379	0.5311	0.707165	-0.100161	0.6171	0.771756	0.242222	0.21205	0.39101	0.117616	0.5466	0.719307	-0.246259	0.22235	0.403921	0.342383	0.0813	0.195654	0.217777	0.26545	0.454502	-0.146098	0.4695	0.656679
MAC_00373	Uncharacterized protein	78.8306	7.7101	90.8041	6.03885	109.42	7.27083	101.01	1.84612	80.6744	5.05894	98.5264	4.60416	0.204001	0.10345	0.233761	0.473047	0.00025	0.00157207	0.357675	0.00465	0.0197441	0.0333559	0.7885	0.885217	0.321754	0.01025	0.0381042	0.269046	0.0303	0.0915504	0.153674	0.21355	0.392943	-0.170645	0.1728	0.338535	0.117753	0.3379	0.53336	-0.115372	0.3483	0.543706	-0.439692	0.00065	0.00364841	-0.151293	0.2207	0.401874
MAC_00374	C2H2 finger domain protein, putative	118.322	1.00583	186.057	8.19187	153.094	14.6313	113.989	7.49775	127.079	4.92102	147.54	8.7745	0.653033	5e-05	0.000362775	0.37171	0.00235	0.0110921	-0.0538169	0.65205	0.79705	0.103016	0.39365	0.588194	0.318394	0.00985	0.0368694	-0.281324	0.0206	0.0671656	-0.70685	5e-05	0.000362775	-0.550017	5e-05	0.000362775	-0.33464	0.00645	0.0260063	-0.425526	0.0009	0.00484136	-0.268693	0.026	0.0810129	-0.0533159	0.65325	0.797882
MAC_00375	Uncharacterized protein	0.210568	0.186775	0	0	0	0	0	0	0.122314	0.211855	0.105726	0.183122	#NAME?	1	1	#NAME?	1	1	#NAME?	1	1	-0.783695	1	1	-0.993963	1	1	0	1	1	0	1	1	inf	1	1	inf	1	1	0	1	1	inf	1	1	inf	1	1
MAC_00376	PRO1A C6 Zink-finger protein	0.0240111	0.0415884	0.126996	0.0440823	0.121313	0.105187	0.122274	0.0727396	0.137075	0.237421	0.126936	0.153647	2.40301	1	1	2.33696	1	1	2.34834	1	1	2.51319	1	1	2.40233	1	1	-0.0660504	1	1	-0.0546664	1	1	0.110183	1	1	-0.00067842	1	1	0.011384	1	1	0.176234	1	1	0.065372	1	1
MAC_00377	Phosphatidylserine decarboxylase family protein	2.04427	0.914043	2.21906	0.316225	2.46323	0.488864	2.67339	0.255651	2.48432	0.234009	3.12515	0.878636	0.118364	0.701	0.830336	0.268965	0.37605	0.570904	0.387085	0.19405	0.367467	0.281268	0.35385	0.549023	0.612341	0.03705	0.107265	0.150601	0.60745	0.764846	0.268721	0.35445	0.549625	0.162904	0.57695	0.742329	0.493977	0.08315	0.198937	0.11812	0.67885	0.815471	0.0123028	0.9698	0.984741	0.343376	0.2155	0.39542
MAC_00378	Autophagy-related protein	3.903	0.372717	5.35194	0.286765	6.44004	0.763262	5.92946	0.902755	5.92251	1.32881	5.94477	0.994568	0.455477	0.0261	0.0812554	0.722485	0.00045	0.00264476	0.603317	0.0036	0.0159129	0.601624	0.00355	0.0157215	0.607037	0.00285	0.0130708	0.267008	0.1708	0.335838	0.14784	0.44915	0.638792	0.146147	0.4495	0.639078	0.15156	0.43675	0.627729	-0.119168	0.53195	0.707744	-0.120861	0.52345	0.700954	-0.115448	0.54435	0.717476
MAC_00379	Uncharacterized protein	30.2389	1.49352	35.4955	6.80846	25.7895	5.97239	19.9508	0.373117	15.8691	0.355485	12.8523	1.46923	0.23123	0.163	0.325026	-0.229623	0.1863	0.35698	-0.599956	0.0011	0.00576616	-0.930187	5e-05	0.000362775	-1.23438	5e-05	0.000362775	-0.460853	0.00815	0.0315393	-0.831186	5e-05	0.000362775	-1.16142	5e-05	0.000362775	-1.46561	5e-05	0.000362775	-0.370334	0.04425	0.123007	-0.700564	0.0003	0.00184856	-1.00475	5e-05	0.000362775
MAC_00380	Mitochondrial DnaJ chaperone (Tim14), putative	969.655	16.0716	895.003	15.253	789.815	7.63013	848.288	23.5334	905.206	47.3537	938.901	60.8011	-0.115578	0.33565	0.531027	-0.295957	0.01545	0.0532365	-0.192918	0.10965	0.243987	-0.0992261	0.4092	0.602737	-0.0464988	0.69885	0.828822	-0.180378	0.1376	0.287696	-0.0773395	0.52705	0.703965	0.0163523	0.89335	0.945769	0.0690795	0.5654	0.733673	0.103039	0.3943	0.588763	0.196731	0.1043	0.235203	0.249458	0.0417	0.117576
MAC_00381	QDE-2-interacting protein	2.87692	0.149319	2.20837	0.193477	1.87808	0.54519	2.80914	0.158855	2.83706	0.443978	2.9895	0.347115	-0.381539	0.1352	0.28412	-0.615266	0.02365	0.0750952	-0.0343937	0.8779	0.93728	-0.0201258	0.9237	0.962038	0.0553808	0.82015	0.90399	-0.233727	0.3922	0.586796	0.347145	0.1788	0.34679	0.361413	0.1584	0.318291	0.43692	0.0897	0.210409	0.580873	0.032	0.095589	0.59514	0.0268	0.0830234	0.670647	0.01265	0.0451513
MAC_00382	Ku70/Ku80 domain &amp; Ku-core domain containing protein	45.7453	3.62558	38.4384	2.24339	44.8046	1.40768	45.8983	1.163	48.5169	1.99617	45.4945	2.66342	-0.251073	0.04625	0.127324	-0.0299759	0.80655	0.896007	0.00481929	0.96805	0.983799	0.0848651	0.49505	0.678259	-0.00792914	0.94615	0.973596	0.221098	0.0803	0.19384	0.255893	0.0401	0.114013	0.335939	0.0072	0.0285084	0.243144	0.05285	0.141059	0.0347952	0.7774	0.878446	0.114841	0.3515	0.546911	0.0220467	0.85745	0.925759
MAC_00383	Uncharacterized protein	239.332	20.9927	268.533	57.0184	265.98	35.77	246.549	36.248	250.903	22.8146	207.502	21.8506	0.166087	0.1798	0.348208	0.152308	0.2178	0.398301	0.0428627	0.72555	0.846594	0.0681181	0.57395	0.740168	-0.205889	0.0933	0.216729	-0.0137798	0.9091	0.954501	-0.123225	0.3237	0.518416	-0.0979693	0.4214	0.613891	-0.371977	0.00305	0.0138366	-0.109445	0.3812	0.5758	-0.0841895	0.49265	0.676363	-0.358197	0.004	0.0173919
MAC_00384	4-nitrophenylphosphatase	75.5468	3.10346	73.2234	6.12465	65.603	0.872371	66.8523	0.683455	65.5964	1.6675	65.275	2.25264	-0.045066	0.7229	0.844968	-0.203608	0.114	0.250903	-0.176394	0.1697	0.334394	-0.203753	0.1155	0.253286	-0.21084	0.1014	0.230417	-0.158542	0.2183	0.398993	-0.131328	0.3068	0.500123	-0.158687	0.21685	0.397159	-0.165774	0.1958	0.369791	0.0272142	0.8287	0.908809	-0.000144996	0.99685	0.997652	-0.00723203	0.9561	0.978345
MAC_00385	DUF1295 domain-containing protein	129.579	10.5263	216.589	17.561	155.198	23.0225	47.3254	4.07839	35.3885	1.15941	33.4744	1.58006	0.741126	5e-05	0.000362775	0.260279	0.03275	0.0973317	-1.45315	5e-05	0.000362775	-1.87248	5e-05	0.000362775	-1.9527	5e-05	0.000362775	-0.480847	5e-05	0.000362775	-2.19427	5e-05	0.000362775	-2.61361	5e-05	0.000362775	-2.69383	5e-05	0.000362775	-1.71342	5e-05	0.000362775	-2.13276	5e-05	0.000362775	-2.21298	5e-05	0.000362775
MAC_00386	DNA topoisomerase	28.2969	1.42481	26.4182	1.65161	25.6167	2.49161	21.1174	2.29936	20.8321	1.63067	20.7298	1.33119	-0.0991092	0.45185	0.641372	-0.143555	0.2692	0.458727	-0.422212	0.00175	0.00861936	-0.441836	0.0011	0.00576616	-0.448939	0.0012	0.00621755	-0.0444457	0.73195	0.850441	-0.323103	0.01575	0.054086	-0.342727	0.0095	0.035793	-0.34983	0.00895	0.0340924	-0.278657	0.0381	0.109624	-0.298281	0.02615	0.0813784	-0.305384	0.02465	0.077672
MAC_00387	Uncharacterized protein	71.8101	5.98002	87.7116	16.1177	55.835	6.51385	35.3514	2.42845	38.9772	0.65599	37.5567	1.20981	0.288581	0.022	0.0707698	-0.363016	0.0058	0.0237988	-1.02242	5e-05	0.000362775	-0.881555	5e-05	0.000362775	-0.935116	5e-05	0.000362775	-0.651597	5e-05	0.000362775	-1.311	5e-05	0.000362775	-1.17014	5e-05	0.000362775	-1.2237	5e-05	0.000362775	-0.659404	5e-05	0.000362775	-0.518539	0.0001	0.000686749	-0.5721	0.00015	0.000993023
MAC_00388	pH-response transcription factor pacC/RIM101	51.4894	1.02623	62.3283	4.65394	56.3477	5.91556	47.4144	2.16735	48.4626	2.3283	59.3176	8.36517	0.275613	0.0268	0.0830234	0.130083	0.2907	0.482763	-0.118951	0.33375	0.529138	-0.0874029	0.47645	0.66275	0.204184	0.10135	0.230329	-0.14553	0.2362	0.42068	-0.394564	0.0011	0.00576616	-0.363016	0.00325	0.0146008	-0.0714287	0.56615	0.734164	-0.249034	0.0424	0.119137	-0.217485	0.0779	0.189406	0.0741015	0.54595	0.718786
MAC_00389	Uncharacterized protein	10.3685	5.51918	6.65124	3.43733	3.93952	2.07517	4.50586	0.0330874	13.2441	0.899484	7.36633	2.43285	-0.640514	0.006	0.0244806	-1.39612	5e-05	0.000362775	-1.20233	5e-05	0.000362775	0.353145	0.0745	0.183013	-0.493191	0.0237	0.0752233	-0.755605	0.006	0.0244806	-0.56182	0.0313	0.0939128	0.993658	5e-05	0.000362775	0.147323	0.53145	0.707389	0.193784	0.48935	0.673489	1.74926	5e-05	0.000362775	0.902927	0.00115	0.00599744
MAC_00390	Uncharacterized protein	69.6403	7.94742	86.7558	9.8808	57.0294	4.92986	30.8877	6.32803	12.722	2.28846	10.0641	1.78652	0.317038	0.02185	0.0703946	-0.288216	0.0479	0.130761	-1.17289	5e-05	0.000362775	-2.4526	5e-05	0.000362775	-2.79071	5e-05	0.000362775	-0.605255	5e-05	0.000362775	-1.48993	5e-05	0.000362775	-2.76964	5e-05	0.000362775	-3.10775	5e-05	0.000362775	-0.884673	5e-05	0.000362775	-2.16439	5e-05	0.000362775	-2.50249	5e-05	0.000362775
MAC_00391	Uncharacterized protein	23.0374	2.33657	21.4871	2.82985	39.7103	1.82656	44.051	1.88049	36.4337	5.40463	36.6782	1.62121	-0.100509	0.46225	0.650414	0.785536	5e-05	0.000362775	0.935195	5e-05	0.000362775	0.661293	5e-05	0.000362775	0.670944	5e-05	0.000362775	0.886044	5e-05	0.000362775	1.0357	5e-05	0.000362775	0.761802	5e-05	0.000362775	0.771453	5e-05	0.000362775	0.149659	0.2349	0.419066	-0.124242	0.32805	0.523067	-0.114591	0.3679	0.562857
MAC_00392	Uncharacterized protein	267.694	10.9365	196.208	26.0977	234.236	20.1254	285.021	8.13297	275.851	8.68398	271.705	14.2211	-0.448197	0.00035	0.00212064	-0.192617	0.1185	0.257969	0.0904838	0.45255	0.641984	0.0433071	0.71695	0.84111	0.0214591	0.8556	0.92462	0.255581	0.03875	0.111091	0.538681	5e-05	0.000362775	0.491504	5e-05	0.000362775	0.469656	0.0002	0.00128619	0.2831	0.02025	0.0662362	0.235924	0.0532	0.141799	0.214076	0.0769	0.187565
MAC_00393	Uncharacterized protein	46.3041	2.05256	44.6444	2.13181	48.9129	4.93916	53.0029	5.47216	49.2974	0.456802	50.9019	6.18565	-0.0526591	0.66885	0.808633	0.0790755	0.51755	0.696261	0.194934	0.11165	0.247165	0.0903724	0.4583	0.647065	0.13658	0.2608	0.449404	0.131735	0.28415	0.47558	0.247593	0.0442	0.122918	0.143032	0.24475	0.430894	0.189239	0.1226	0.264507	0.115858	0.34425	0.539829	0.0112969	0.9237	0.962038	0.0575048	0.63625	0.785646
MAC_00394	Uncharacterized protein	38.0146	2.72064	33.7506	3.78158	25.111	2.92832	27.7307	3.67395	26.4061	1.61638	34.4271	2.31247	-0.17164	0.20995	0.38823	-0.598232	5e-05	0.000362775	-0.455069	0.00115	0.00599744	-0.525681	0.00015	0.000993023	-0.143009	0.29755	0.490253	-0.426592	0.00265	0.0122799	-0.283429	0.04225	0.11879	-0.354041	0.01115	0.0408255	0.0286314	0.83215	0.910771	0.143164	0.32275	0.51744	0.0725516	0.62415	0.776733	0.455224	0.001	0.00530838
MAC_00395	Spindle pole protein Nnf1, putative	24.4666	1.20631	40.8483	6.97062	32.5816	1.82187	25.2364	3.79696	28.6297	1.70433	31.8209	3.15244	0.739467	5e-05	0.000362775	0.413247	0.0094	0.0354979	0.044695	0.7837	0.882472	0.226703	0.16505	0.327837	0.379166	0.0194	0.0639603	-0.326219	0.02795	0.0859037	-0.694772	5e-05	0.000362775	-0.512764	0.00045	0.00264476	-0.360301	0.0177	0.0594422	-0.368552	0.0201	0.0658425	-0.186544	0.2356	0.419906	-0.0340815	0.82875	0.90884
MAC_00396	Uncharacterized protein	218.602	10.5172	202.977	30.9359	232.897	26.5145	373.127	9.86047	355.66	43.3467	315.634	12.5729	-0.10699	0.3836	0.578211	0.0913863	0.45885	0.647519	0.771363	5e-05	0.000362775	0.702197	5e-05	0.000362775	0.529947	5e-05	0.000362775	0.198376	0.1062	0.238326	0.878353	5e-05	0.000362775	0.809187	5e-05	0.000362775	0.636937	5e-05	0.000362775	0.679977	5e-05	0.000362775	0.610811	5e-05	0.000362775	0.438561	0.00045	0.00264476
MAC_00397	NTF2 and RRM domain-containing protein	159.214	6.67155	140.063	6.67243	133.989	12.9349	162.835	1.36261	153.073	13.7545	158.491	10.4127	-0.184885	0.1292	0.275055	-0.248851	0.04205	0.118335	0.0324461	0.7869	0.884299	-0.0567477	0.64315	0.790574	-0.00656723	0.9546	0.977587	-0.0639658	0.5992	0.758719	0.217331	0.0746	0.183186	0.128137	0.2871	0.478842	0.178318	0.14375	0.296864	0.281297	0.021	0.0682053	0.192103	0.1107	0.245651	0.242284	0.04535	0.125365
MAC_00398	Ribosome assembly factor mrt4	113.206	2.49682	97.3227	43.6635	86.4978	21.3603	171.405	20.9528	144.119	5.79236	165.18	17.2951	-0.218107	0.096	0.22129	-0.38822	0.0026	0.0120896	0.598458	5e-05	0.000362775	0.348304	0.0055	0.0227569	0.545084	5e-05	0.000362775	-0.170113	0.2008	0.376463	0.816565	5e-05	0.000362775	0.566411	5e-05	0.000362775	0.763191	5e-05	0.000362775	0.986678	5e-05	0.000362775	0.736524	5e-05	0.000362775	0.933304	5e-05	0.000362775
MAC_00399	U1 small nuclear ribonucleoprotein	211.472	8.0783	184.272	11.7426	160.733	7.73265	171.169	2.82177	186.67	3.49331	176.719	7.33	-0.198632	0.10105	0.22979	-0.395797	0.00115	0.00599744	-0.305044	0.01205	0.0434358	-0.179975	0.13555	0.284625	-0.259006	0.03205	0.0957085	-0.197165	0.10625	0.238417	-0.106412	0.37695	0.571796	0.018657	0.87545	0.93588	-0.0603744	0.61585	0.770952	0.0907529	0.452	0.641482	0.215822	0.07175	0.177912	0.136791	0.2584	0.446579
MAC_00400	Mitochondrial 54S ribosomal protein L51	422.351	20.7504	371.327	7.88472	340.201	22.9091	435.462	40.7907	435.583	13.1535	435.206	3.83652	-0.185751	0.13255	0.280202	-0.312055	0.0128	0.0455964	0.0441035	0.72005	0.843205	0.0445035	0.72335	0.845263	0.0432573	0.7302	0.84932	-0.126304	0.30055	0.493516	0.229855	0.05985	0.155157	0.230255	0.0606	0.156716	0.229008	0.061	0.157537	0.356158	0.0041	0.0177504	0.356558	0.0039	0.0170189	0.355312	0.0049	0.0206171
MAC_00401	Triosephosphate isomerase	758.433	32.0832	734.917	28.5012	732.767	10.5945	679.329	16.869	562.351	31.8956	666.77	51.2562	-0.0454415	0.72545	0.846541	-0.0496674	0.70175	0.830813	-0.158912	0.21795	0.398511	-0.431551	0.001	0.00530838	-0.185833	0.15375	0.311619	-0.00422593	0.9742	0.986594	-0.11347	0.38325	0.577873	-0.38611	0.00285	0.0130708	-0.140392	0.28155	0.47269	-0.109244	0.3993	0.593402	-0.381884	0.0038	0.016652	-0.136166	0.2928	0.485053
MAC_00402	Uncharacterized protein	1.47376	1.23456	2.18797	0.622721	1.78544	0.678418	1.47958	0.336112	1.34611	0.668094	1.70612	0.342783	0.570089	0.1615	0.32293	0.276772	0.51195	0.691778	0.00568189	0.9399	0.970431	-0.130705	0.7795	0.879717	0.211211	0.6245	0.777005	-0.293316	0.44565	0.635631	-0.564407	0.1554	0.313951	-0.700793	0.0913	0.213161	-0.358878	0.352	0.547388	-0.271091	0.5155	0.694667	-0.407477	0.3371	0.532455	-0.0655619	0.8532	0.923053
MAC_00403	Uncharacterized protein	2.53597	0.213823	3.34867	1.22338	3.52775	0.64391	4.50613	0.266721	3.91176	0.404446	4.85682	0.604143	0.40105	0.07965	0.192607	0.476209	0.03505	0.102676	0.82935	0.00015	0.000993023	0.625281	0.00485	0.0204475	0.937474	5e-05	0.000362775	0.0751589	0.7337	0.851608	0.4283	0.042	0.118224	0.224231	0.2894	0.48135	0.536424	0.01095	0.0402222	0.353141	0.08475	0.201749	0.149072	0.4762	0.662602	0.461265	0.0252	0.0790527
MAC_00404	ADP-ribosylation factor	38.0715	1.278	34.6159	1.50014	32.7397	0.560333	29.4458	0.185131	29.5504	1.70237	29.6742	2.02567	-0.137274	0.2556	0.443267	-0.21767	0.073	0.180246	-0.370648	0.00215	0.0102874	-0.365531	0.003	0.0136591	-0.359502	0.00375	0.0164672	-0.0803964	0.50415	0.685564	-0.233374	0.0536	0.142623	-0.228257	0.0623	0.160091	-0.222228	0.06665	0.168372	-0.152978	0.20915	0.387217	-0.147861	0.22935	0.412328	-0.141831	0.246	0.432318
MAC_00405	1-acyl-sn-glycerol-3-phosphate acyltransferase	144.611	17.1341	263.871	11.5487	123.804	14.9287	53.3872	5.85774	54.6686	2.41501	65.4878	3.91086	0.867656	5e-05	0.000362775	-0.224123	0.06735	0.169676	-1.43761	5e-05	0.000362775	-1.40339	5e-05	0.000362775	-1.14288	5e-05	0.000362775	-1.09178	5e-05	0.000362775	-2.30527	5e-05	0.000362775	-2.27105	5e-05	0.000362775	-2.01054	5e-05	0.000362775	-1.21349	5e-05	0.000362775	-1.17927	5e-05	0.000362775	-0.918759	5e-05	0.000362775
MAC_00406	DUF2347 superfamily protein	78.1467	9.46536	123.055	6.90988	52.7931	2.02747	31.0666	2.13022	32.2991	0.872909	32.4138	1.25834	0.655048	5e-05	0.000362775	-0.565835	5e-05	0.000362775	-1.33082	5e-05	0.000362775	-1.27469	5e-05	0.000362775	-1.26958	5e-05	0.000362775	-1.22088	5e-05	0.000362775	-1.98587	5e-05	0.000362775	-1.92974	5e-05	0.000362775	-1.92462	5e-05	0.000362775	-0.764987	5e-05	0.000362775	-0.708856	5e-05	0.000362775	-0.703742	5e-05	0.000362775
MAC_00407	Preprotein translocase subunit	161.138	9.1204	178.007	5.46801	122.999	6.36197	141.052	1.77232	167.365	6.13535	151.942	7.60516	0.143639	0.25345	0.440952	-0.389646	0.0023	0.0108941	-0.192068	0.12105	0.261903	0.0547071	0.66765	0.807897	-0.0847734	0.4941	0.677539	-0.533285	0.0001	0.000686749	-0.335706	0.0073	0.0288364	-0.0889317	0.4857	0.670543	-0.228412	0.06835	0.171542	0.197579	0.10835	0.241903	0.444353	0.00045	0.00264476	0.304873	0.0137	0.0482063
MAC_00408	Patatin-like phospholipase domain-containing protein	52.8335	2.98345	59.2928	4.12615	48.0486	3.92986	36.3559	0.724309	34.415	2.41507	31.4878	2.42491	0.166405	0.16695	0.330535	-0.136958	0.25715	0.445148	-0.539261	5e-05	0.000362775	-0.618413	5e-05	0.000362775	-0.746659	5e-05	0.000362775	-0.303363	0.01305	0.046341	-0.705666	5e-05	0.000362775	-0.784818	5e-05	0.000362775	-0.913064	5e-05	0.000362775	-0.402303	0.00145	0.0073241	-0.481455	0.00015	0.000993023	-0.609701	5e-05	0.000362775
MAC_00409	GTP-binding protein SAR1	416.764	18.4612	398.798	17.7296	384.409	5.65113	423.898	34.2647	455.705	6.28077	422.352	19.2704	-0.063572	0.60335	0.761842	-0.11659	0.3337	0.529086	0.0244866	0.839	0.914744	0.128872	0.2874	0.479189	0.0192173	0.87435	0.935322	-0.0530175	0.65865	0.801574	0.0880586	0.4633	0.651375	0.192444	0.11055	0.245411	0.0827893	0.4874	0.671853	0.141076	0.2415	0.426966	0.245461	0.03945	0.112597	0.135807	0.2603	0.448791
MAC_00410	Uncharacterized protein	109.689	5.43857	98.6116	13.1849	98.6838	5.37613	105.439	13.319	114.847	0.562105	125.477	3.62505	-0.153584	0.2057	0.382703	-0.152529	0.20385	0.380319	-0.0570099	0.6376	0.786611	0.0663042	0.58295	0.746767	0.194013	0.11515	0.252768	0.00105522	0.9912	0.994701	0.0965742	0.42865	0.620494	0.219888	0.0682	0.171283	0.347598	0.0042	0.0181209	0.095519	0.42525	0.617375	0.218833	0.06955	0.173807	0.346542	0.0042	0.0181209
MAC_00411	ATP synthase delta chain	1142.57	26.3335	1082.03	17.4553	988.225	76.069	965.771	52.2797	942.182	52.0813	1001.18	105.777	-0.0785507	0.53285	0.708419	-0.209373	0.1005	0.22884	-0.242531	0.05215	0.139643	-0.278207	0.02665	0.0826451	-0.190579	0.1377	0.287818	-0.130823	0.3003	0.493216	-0.163981	0.18765	0.358821	-0.199656	0.1142	0.251214	-0.112029	0.3752	0.57017	-0.0331579	0.78885	0.885387	-0.0688338	0.58075	0.745207	0.0187938	0.88095	0.938952
MAC_00412	C6 finger domain-containing protein	3.24649	0.179756	3.24311	0.882271	5.44415	0.934579	4.68833	1.89923	5.26305	0.581803	4.6662	0.774378	-0.00150367	0.9729	0.986094	0.745825	0.00205	0.00987573	0.530193	0.02725	0.0841493	0.697015	0.0035	0.0155305	0.523364	0.0285	0.0872515	0.747329	0.00215	0.0102874	0.531696	0.02735	0.0843911	0.698519	0.00415	0.0179363	0.524868	0.0281	0.0862646	-0.215632	0.3231	0.517761	-0.0488099	0.8193	0.903517	-0.222461	0.3051	0.498377
MAC_00413	Uncharacterized protein	6.1932	1.57691	8.0105	3.09635	9.11955	2.82072	5.33879	1.84259	3.75786	1.36426	6.70431	5.04563	0.371208	0.30235	0.495491	0.558278	0.1181	0.257332	-0.214172	0.5777	0.742795	-0.720775	0.11815	0.257414	0.114404	0.764	0.870458	0.18707	0.5732	0.739599	-0.58538	0.11105	0.246213	-1.09198	0.0252	0.0790527	-0.256804	0.4708	0.657936	-0.77245	0.0388	0.111193	-1.27905	0.01245	0.0445806	-0.443874	0.20395	0.380448
MAC_00414	Calcium homeostasis protein Regucalcin, putative	171.625	4.9023	221.569	24.3387	281.519	8.28915	177.766	13.5504	145.082	6.41924	153.636	6.36592	0.368495	0.0029	0.013262	0.713972	5e-05	0.000362775	0.0507185	0.67385	0.812004	-0.24239	0.0497	0.134589	-0.159744	0.1885	0.359981	0.345476	0.00455	0.019383	-0.317777	0.0084	0.0323248	-0.610886	5e-05	0.000362775	-0.528239	5e-05	0.000362775	-0.663253	5e-05	0.000362775	-0.956362	5e-05	0.000362775	-0.873715	5e-05	0.000362775
MAC_00415	Uncharacterized protein	14.6283	1.40831	29.7224	5.49805	33.4997	3.68729	15.4299	1.64776	15.0303	0.731402	15.5672	1.01474	1.02279	5e-05	0.000362775	1.19539	5e-05	0.000362775	0.076963	0.6126	0.768693	0.0391113	0.7985	0.891274	0.0897439	0.5538	0.724857	0.172599	0.1936	0.36685	-0.945825	5e-05	0.000362775	-0.983677	5e-05	0.000362775	-0.933044	5e-05	0.000362775	-1.11842	5e-05	0.000362775	-1.15628	5e-05	0.000362775	-1.10564	5e-05	0.000362775
MAC_00416	Aldehyde dehydrogenase	12.1233	2.00729	12.5949	0.679236	13.5276	0.602803	13.2381	2.21112	14.6502	1.64808	13.3261	1.30801	0.0550619	0.7584	0.867158	0.158122	0.3847	0.579301	0.126911	0.4836	0.668808	0.273143	0.12665	0.270985	0.136477	0.45125	0.640834	0.10306	0.57115	0.738064	0.0718492	0.6919	0.824312	0.218081	0.222	0.403521	0.0814152	0.65685	0.800299	-0.0312105	0.8646	0.929765	0.115021	0.5142	0.693681	-0.0216445	0.9058	0.952636
MAC_00417	Uncharacterized protein	75.1919	2.93188	79.6116	1.08631	71.017	0.607289	66.3498	2.5102	68.7995	1.25078	61.2592	4.46399	0.0824018	0.49855	0.681164	-0.0824133	0.4937	0.677199	-0.180484	0.1371	0.286945	-0.128178	0.29485	0.487314	-0.295651	0.0157	0.0539515	-0.164815	0.171	0.336045	-0.262886	0.03175	0.095011	-0.21058	0.08475	0.201749	-0.378053	0.00155	0.00776179	-0.098071	0.4136	0.606576	-0.0457647	0.70525	0.833133	-0.213238	0.0796	0.19252
MAC_00418	Uncharacterized protein	0.0591301	0.102416	0.124177	0.215081	0.0561211	0.0972044	0.125521	0.10893	0.172153	0.0303256	0.305241	0.229344	1.07043	1	1	-0.0753473	1	1	1.08596	1	1	1.54173	1	1	2.36799	1	1	-1.14578	1	1	0.0155297	1	1	0.471291	1	1	1.29755	1	1	1.16131	1	1	1.61707	1	1	2.44333	1	1
MAC_00419	Uncharacterized protein	34.6682	3.35731	38.3063	4.40021	43.9162	2.05129	42.6649	1.11016	49.1339	1.4076	44.5069	3.55197	0.143966	0.2374	0.422104	0.341137	0.0056	0.02311	0.299436	0.01305	0.046341	0.503105	0.0001	0.000686749	0.360415	0.00375	0.0164672	0.197171	0.1003	0.228502	0.15547	0.20105	0.376795	0.359139	0.00285	0.0130708	0.216449	0.0749	0.18376	-0.0417018	0.734	0.851805	0.161968	0.1846	0.354596	0.0192776	0.8742	0.935202
MAC_00420	Uncharacterized protein	14.1581	4.4922	16.2633	3.74965	8.08508	3.83905	9.75187	4.20185	13.7479	1.83408	12.6522	0.692267	0.199993	0.2717	0.461521	-0.808293	0.00025	0.00157207	-0.537876	0.00535	0.022219	-0.0424193	0.8182	0.902864	-0.162235	0.3833	0.57792	-1.00829	5e-05	0.000362775	-0.737869	0.0002	0.00128619	-0.242413	0.18325	0.352831	-0.362229	0.0508	0.136876	0.270417	0.1953	0.36916	0.765873	0.0002	0.00128619	0.646057	0.0021	0.0100834
MAC_00421	Uncharacterized protein	29.345	12.4871	33.4619	9.0578	18.3582	8.35527	8.2758	2.15616	12.6262	0.826573	12.9645	0.64203	0.189404	0.1734	0.339288	-0.676688	5e-05	0.000362775	-1.82615	5e-05	0.000362775	-1.2167	5e-05	0.000362775	-1.17855	5e-05	0.000362775	-0.866092	5e-05	0.000362775	-2.01555	5e-05	0.000362775	-1.4061	5e-05	0.000362775	-1.36796	5e-05	0.000362775	-1.14946	5e-05	0.000362775	-0.540009	0.0004	0.00238366	-0.501865	0.00145	0.0073241
MAC_00422	Uncharacterized protein	30.6212	11.639	29.4722	4.35649	17.7831	5.79482	13.7517	3.1976	19.0191	2.82567	24.9139	0.797845	-0.055177	0.69035	0.823285	-0.784027	5e-05	0.000362775	-1.15492	5e-05	0.000362775	-0.687084	5e-05	0.000362775	-0.297584	0.0365	0.105996	-0.72885	5e-05	0.000362775	-1.09974	5e-05	0.000362775	-0.631907	5e-05	0.000362775	-0.242407	0.0824	0.19761	-0.370892	0.0222	0.0712933	0.0969427	0.52185	0.699723	0.486443	0.0015	0.00754603
MAC_00423	tRNA exportin	83.7713	2.01908	82.9008	5.60595	80.3104	5.51292	88.3655	8.11223	83.1215	6.245	87.6985	6.82074	-0.01507	0.89955	0.949385	-0.0608686	0.61425	0.769856	0.0770267	0.52895	0.705458	-0.0112342	0.9271	0.963772	0.0660956	0.5884	0.750704	-0.0457985	0.7028	0.831518	0.0920967	0.45245	0.641916	0.00383584	0.97615	0.987466	0.0811656	0.50955	0.689861	0.137895	0.25905	0.447261	0.0496344	0.687	0.821107	0.126964	0.30055	0.493516
MAC_00424	Uncharacterized protein	3867.45	123.9	2704.22	138.644	2859.51	206.076	3281.71	243.69	3315.61	232.724	4120.99	242.137	-0.516169	0.01195	0.0431415	-0.435614	0.03575	0.104236	-0.236935	0.26375	0.452663	-0.222111	0.29445	0.486918	0.0916082	0.6753	0.812996	0.0805549	0.6733	0.811585	0.279234	0.15475	0.313039	0.294058	0.13225	0.279744	0.607777	0.0046	0.0195686	0.198679	0.3225	0.517179	0.213503	0.28395	0.475341	0.527222	0.01455	0.0506656
MAC_00425	Importin beta-5 subunit, putative	97.9114	2.07357	76.8075	7.34594	101.646	9.1349	105.747	6.87774	97.3256	4.10612	108.272	9.86731	-0.350229	0.0042	0.0181209	0.0539991	0.66975	0.809313	0.111066	0.3761	0.570959	-0.0086575	0.94515	0.973163	0.145106	0.2484	0.435049	0.404229	0.0009	0.00484136	0.461296	0.00025	0.00157207	0.341572	0.00535	0.022219	0.495336	5e-05	0.000362775	0.0570674	0.6463	0.792762	-0.0626566	0.61525	0.770527	0.0911072	0.4656	0.653435
MAC_00426	Uncharacterized protein	41.8494	4.36447	53.4688	10.839	60.8248	7.02274	34.034	3.36121	29.2264	1.64452	33.0475	1.96753	0.353491	0.00965	0.0362615	0.539452	0.0001	0.000686749	-0.298231	0.03145	0.0942856	-0.517936	0.00025	0.00157207	-0.340667	0.01365	0.0480738	0.185962	0.1559	0.314655	-0.651722	5e-05	0.000362775	-0.871427	5e-05	0.000362775	-0.694157	5e-05	0.000362775	-0.837684	5e-05	0.000362775	-1.05739	5e-05	0.000362775	-0.880119	5e-05	0.000362775
MAC_00427	Uncharacterized protein	0.650068	0.140765	0.700873	0.139435	1.14602	0.034075	1.41155	0.402619	1.32113	0.340895	0.641661	0.137024	0.108561	1	1	0.817963	1	1	1.11862	0.00195	0.00946249	1.02311	0.0035	0.0155305	-0.0187793	1	1	0.709403	1	1	1.01006	0.00255	0.0118851	0.914551	0.0055	0.0227569	-0.12734	1	1	0.300658	0.2826	0.473776	0.205149	0.46825	0.655624	-0.836743	1	1
MAC_00428	REV7-like protein	29.3082	4.35735	28.891	3.6563	26.1241	2.69314	24.7536	4.4659	28.4508	4.92656	25.9989	1.41453	-0.0206821	0.89255	0.945372	-0.16592	0.30245	0.49559	-0.243663	0.13055	0.277142	-0.0428344	0.78395	0.882626	-0.172851	0.28045	0.47146	-0.145238	0.36205	0.55683	-0.222981	0.16705	0.330669	-0.0221523	0.88685	0.942351	-0.152169	0.3413	0.536854	-0.077743	0.6362	0.785608	0.123086	0.43565	0.626727	-0.00693056	0.9648	0.982309
MAC_00429	Rho guanyl nucleotide exchange factor	17.3115	1.5454	21.1692	2.44319	24.7702	1.51904	19.5133	2.29006	19.1629	0.336939	17.4833	1.29666	0.290235	0.0199	0.0652922	0.516871	5e-05	0.000362775	0.172725	0.165	0.327769	0.146583	0.2383	0.423046	0.0142419	0.91015	0.955088	0.226636	0.0674	0.169771	-0.11751	0.33565	0.531027	-0.143651	0.24195	0.427525	-0.275993	0.0277	0.0852701	-0.344147	0.006	0.0244806	-0.370288	0.00315	0.0142182	-0.502629	5e-05	0.000362775
MAC_00430	Uncharacterized protein	227.181	9.38842	247.72	34.968	272.185	34.6405	231.012	13.2551	205.548	27.6654	204.93	25.581	0.124867	0.33565	0.531027	0.260745	0.04375	0.121994	0.0241237	0.85185	0.922434	-0.144366	0.2723	0.462205	-0.14871	0.25775	0.445877	0.135878	0.29325	0.485521	-0.100743	0.43345	0.624703	-0.269233	0.04035	0.114561	-0.273577	0.03805	0.109505	-0.236621	0.06835	0.171542	-0.40511	0.0019	0.00925559	-0.409454	0.0017	0.00840203
MAC_00431	Rad4 family protein	11.0074	1.40967	11.4811	1.0501	15.1562	1.26105	14.7403	0.449594	16.0647	0.344243	13.2503	0.38545	0.0607945	0.6669	0.807374	0.461442	0.0013	0.00666464	0.421301	0.00295	0.013463	0.545423	0.00015	0.000993023	0.26756	0.0591	0.153648	0.400648	0.0045	0.0192068	0.360506	0.01075	0.0396209	0.484628	0.00075	0.00413583	0.206765	0.14295	0.295722	-0.0401415	0.77105	0.87463	0.0839806	0.53405	0.70937	-0.193883	0.1606	0.32159
MAC_00432	Zinc finger protein	76.9699	10.3352	48.4374	3.04271	30.1339	3.68971	29.6216	2.36325	28.2535	1.60854	29.1033	1.60166	-0.668173	5e-05	0.000362775	-1.35291	5e-05	0.000362775	-1.37764	5e-05	0.000362775	-1.44587	5e-05	0.000362775	-1.40311	5e-05	0.000362775	-0.684734	5e-05	0.000362775	-0.709471	5e-05	0.000362775	-0.777695	5e-05	0.000362775	-0.734939	5e-05	0.000362775	-0.0247373	0.86895	0.932158	-0.0929605	0.53135	0.707317	-0.0502051	0.7425	0.857217
MAC_00433	Uncharacterized protein	242.998	4.74282	242.4	18.9228	159.509	10.5645	117.127	6.37182	107.343	3.66382	100.428	8.03889	-0.00355426	0.978	0.988445	-0.607308	5e-05	0.000362775	-1.05287	5e-05	0.000362775	-1.17872	5e-05	0.000362775	-1.27478	5e-05	0.000362775	-0.603754	5e-05	0.000362775	-1.04931	5e-05	0.000362775	-1.17516	5e-05	0.000362775	-1.27122	5e-05	0.000362775	-0.445558	0.00025	0.00157207	-0.571407	5e-05	0.000362775	-0.667467	5e-05	0.000362775
MAC_00434	Uncharacterized protein	1349.86	53.85	1302.73	52.4811	1138.71	39.0728	1206.25	80.232	1106.25	62.7184	1256.27	180.533	-0.0512716	0.67985	0.816168	-0.245409	0.04795	0.130861	-0.162282	0.19205	0.364746	-0.287135	0.02	0.0655701	-0.103661	0.39935	0.593419	-0.194138	0.11915	0.258985	-0.111011	0.3693	0.56425	-0.235863	0.0602	0.155895	-0.052389	0.67075	0.809915	0.0831269	0.50015	0.682406	-0.0417256	0.73985	0.855467	0.141749	0.25105	0.438093
MAC_00435	Vacuolar protein sorting-associated protein 62	69.0659	4.2005	67.3206	3.2477	50.0892	5.8313	45.8146	3.28403	46.8264	1.97945	48.7061	2.32297	-0.0369266	0.76185	0.869202	-0.463476	0.0003	0.00184856	-0.592168	5e-05	0.000362775	-0.560651	5e-05	0.000362775	-0.503872	0.0001	0.000686749	-0.426549	0.0006	0.00340137	-0.555242	5e-05	0.000362775	-0.523724	5e-05	0.000362775	-0.466946	0.0001	0.000686749	-0.128693	0.298	0.490721	-0.0971754	0.43115	0.622672	-0.0403969	0.74615	0.859535
MAC_00436	GCN5-related N-acetyltransferase	4.20675	1.01097	4.01674	1.35083	2.95762	0.80759	1.97664	0.470492	3.49985	1.43172	4.25538	1.10831	-0.0666809	0.85865	0.926444	-0.508271	0.1807	0.34937	-1.08966	0.0343	0.100921	-0.265413	0.4581	0.6469	0.0165822	0.95415	0.977399	-0.44159	0.2456	0.431877	-1.02297	0.0439	0.122316	-0.198732	0.5798	0.74438	0.0832631	0.8029	0.893676	-0.581385	0.24735	0.433881	0.242857	0.53165	0.707519	0.524853	0.16565	0.328635
MAC_00437	Valyl-tRNA synthetase	7.07868	0.716981	3.72305	0.269763	2.13404	0.574519	1.78492	0.479635	1.68321	0.49985	1.81973	0.282756	-0.926997	0.0002	0.00128619	-1.7299	5e-05	0.000362775	-1.98762	5e-05	0.000362775	-2.07226	5e-05	0.000362775	-1.95976	5e-05	0.000362775	-0.8029	0.00535	0.022219	-1.06062	0.0009	0.00484136	-1.14526	0.0006	0.00340137	-1.03276	0.00135	0.00688777	-0.257724	0.4126	0.605666	-0.342365	0.28825	0.480027	-0.229863	0.46395	0.652009
MAC_00438	MFS multidrug transporter, putative	15.9839	0.498231	17.5481	0.984004	18.1336	0.523067	18.5704	0.751976	18.9411	0.81465	19.3838	1.60054	0.1347	0.36005	0.554968	0.182048	0.2131	0.392428	0.216393	0.1388	0.289543	0.244903	0.09045	0.211717	0.278238	0.057	0.149468	0.0473482	0.74545	0.8591	0.0816932	0.57575	0.741506	0.110204	0.4418	0.632081	0.143538	0.31765	0.511909	0.034345	0.8128	0.899962	0.0628557	0.6609	0.803205	0.0961901	0.50115	0.683111
MAC_00439	Uncharacterized protein	72.0796	15.224	110.522	32.3474	95.0333	27.1985	96.0017	16.9896	107.136	21.9336	83.8537	25.4696	0.616665	0.00365	0.0161019	0.398842	0.0581	0.151713	0.413469	0.04985	0.134875	0.571782	0.00765	0.0299612	0.218285	0.30465	0.497903	-0.217824	0.2666	0.455794	-0.203196	0.29925	0.492089	-0.0448837	0.81465	0.900928	-0.398381	0.051	0.137302	0.0146271	0.94925	0.974892	0.17294	0.37895	0.573641	-0.180557	0.37615	0.571007
MAC_00440	Acetyl-CoA carboxylase	56.7785	9.60115	53.5953	11.0989	56.0108	8.33647	49.5987	4.61205	60.9028	7.6627	61.1412	6.70396	-0.0832383	0.5275	0.704324	-0.0196406	0.8791	0.937904	-0.195042	0.13115	0.278112	0.101164	0.43705	0.628051	0.106801	0.4102	0.603546	0.0635977	0.61985	0.773757	-0.111803	0.3805	0.575155	0.184403	0.153	0.310489	0.19004	0.1412	0.293213	-0.175401	0.17235	0.337914	0.120805	0.34825	0.543649	0.126442	0.3274	0.522392
MAC_00441	Nuclear distribution protein nudE	37.0518	0.391906	41.1549	5.28514	48.3391	2.33471	49.9482	1.26524	49.5784	2.02552	48.6484	2.62182	0.151522	0.23205	0.415758	0.383648	0.00275	0.0126842	0.430889	0.00085	0.00460684	0.420169	0.00125	0.00644361	0.39285	0.0023	0.0108941	0.232126	0.0642	0.163772	0.279367	0.02525	0.0791756	0.268647	0.0319	0.095343	0.241328	0.0556	0.146569	0.0472418	0.6944	0.826001	0.0365218	0.76365	0.870266	0.00920233	0.93965	0.970358
MAC_00442	E3 ubiquitin-protein ligase MARCH6	13.9482	0.282113	18.7191	1.46561	16.7902	0.430114	15.2396	0.527193	16.422	0.270987	16.9421	1.78409	0.42444	0.0007	0.00389376	0.267541	0.02975	0.0902875	0.127754	0.31005	0.503692	0.235555	0.0577	0.150922	0.280539	0.02115	0.0685833	-0.156899	0.20295	0.379288	-0.296687	0.01595	0.0546627	-0.188885	0.1296	0.275652	-0.143901	0.24425	0.430312	-0.139787	0.2639	0.452814	-0.031986	0.79675	0.890399	0.0129979	0.9161	0.958116
MAC_00443	Transcription factor hoxa13, putative	36.3132	1.04215	34.2674	2.12215	40.9688	0.387918	35.9685	1.0179	37.8827	0.417706	36.8361	3.10443	-0.083657	0.489	0.673172	0.17403	0.1536	0.311391	-0.0137602	0.9107	0.955278	0.0610456	0.6145	0.770006	0.0206263	0.86395	0.929326	0.257687	0.0346	0.101612	0.0698968	0.5681	0.735673	0.144703	0.23455	0.418676	0.104283	0.3932	0.587748	-0.18779	0.11855	0.258046	-0.112984	0.3469	0.542365	-0.153404	0.2083	0.386097
MAC_00444	General amino acid permease (Agp2), putative	41.9576	1.7683	42.8601	4.32392	35.6754	4.88675	48.3427	2.30335	47.1994	1.08922	47.2939	3.91145	0.0307026	0.8062	0.895779	-0.234004	0.06775	0.170442	0.204367	0.10575	0.23753	0.169835	0.1758	0.342648	0.172721	0.17035	0.335239	-0.264707	0.03755	0.108365	0.173664	0.16715	0.330799	0.139133	0.26865	0.458172	0.142019	0.2602	0.44868	0.438371	0.0005	0.0029	0.403839	0.00165	0.008192	0.406726	0.00175	0.00861936
MAC_00445	Aldo/keto reductase	1.41656	0.487877	1.30128	0.683099	1.06051	0.446678	1.97257	0.447395	1.89101	0.433561	1.78443	0.153425	-0.122461	0.75185	0.863039	-0.417635	0.31475	0.508711	0.477678	0.1957	0.369692	0.416757	0.2553	0.442956	0.33307	0.3683	0.563296	-0.295174	0.4958	0.678913	0.600139	0.11725	0.25605	0.539218	0.15985	0.320496	0.455532	0.22915	0.412093	0.895313	0.03215	0.0959358	0.834393	0.046	0.126801	0.750706	0.0715	0.177454
MAC_00446	CAS1 appressorium specific protein	0	0	0	0	0.0364638	0.0631569	0	0	0.0956465	0.165665	0.0917984	0.158999	0	1	1	inf	1	1	0	1	1	inf	1	1	inf	1	1	inf	1	1	0	1	1	inf	1	1	inf	1	1	#NAME?	1	1	1.39125	1	1	1.332	1	1
MAC_00447	Uncharacterized protein	1.63026	0.279792	1.40783	0.512543	1.64998	0.261081	1.60127	0.297576	2.62192	0.562622	2.25176	0.132771	-0.211623	0.5871	0.749799	0.017352	0.95365	0.977048	-0.0258807	0.9508	0.975694	0.685523	0.04955	0.134244	0.465957	0.18795	0.359245	0.228975	0.5592	0.728942	0.185743	0.63395	0.784028	0.897146	0.01895	0.0627794	0.67758	0.0743	0.182651	-0.0432327	0.91825	0.959107	0.668171	0.056	0.147377	0.448605	0.203	0.379347
MAC_00448	Tetratricopeptide repeat protein	1.79276	0.266683	2.10261	0.34242	2.31754	0.297776	2.07764	0.0961779	2.6438	0.177132	1.89994	0.179948	0.229994	0.28445	0.475922	0.370407	0.078	0.189586	0.21276	0.31715	0.511308	0.560426	0.0077	0.0301135	0.0837682	0.697	0.827757	0.140413	0.49555	0.678742	-0.017234	0.939	0.969977	0.330432	0.10595	0.237894	-0.146226	0.48975	0.673846	-0.157647	0.4353	0.626426	0.19002	0.337	0.532364	-0.286639	0.17295	0.338743
MAC_00449	Cell cycle control protein cwf16	73.9621	5.40923	61.2274	2.73098	54.733	3.42904	61.4752	2.33357	66.1959	8.38696	58.1982	0.770906	-0.272608	0.06295	0.161371	-0.434375	0.0041	0.0177504	-0.266782	0.0633	0.162065	-0.160044	0.2688	0.45829	-0.345811	0.02155	0.0696228	-0.161767	0.2855	0.477056	0.00582626	0.9663	0.982967	0.112564	0.45225	0.641742	-0.0732029	0.63075	0.781741	0.167593	0.2694	0.458936	0.27433	0.0721	0.178609	0.0885639	0.5705	0.73753
MAC_00450	Zinc finger protein RTS2	48.7817	2.69451	50.1925	8.0112	38.3936	2.73904	40.7988	2.75819	38.759	0.942979	38.5523	1.55224	0.0411337	0.7645	0.870693	-0.345473	0.01375	0.0483644	-0.257811	0.0618	0.159134	-0.331808	0.0183	0.0610666	-0.339522	0.0159	0.0545244	-0.386606	0.0046	0.0195686	-0.298945	0.029	0.0884731	-0.372942	0.00725	0.0286753	-0.380655	0.0063	0.0255056	0.0876617	0.5286	0.705293	0.0136647	0.9227	0.961528	0.00595085	0.9637	0.981853
MAC_00451	Transcription elongation factor SPT4	159.453	6.03745	169.326	6.58975	157.414	4.39573	165.094	14.2542	157.468	14.9344	164.067	9.4072	0.0866698	0.5353	0.710333	-0.0185722	0.8961	0.947391	0.0501564	0.72425	0.845862	-0.0180779	0.8953	0.946899	0.0411508	0.77155	0.874855	-0.105242	0.45625	0.645232	-0.0365134	0.7906	0.886631	-0.104748	0.4584	0.647133	-0.045519	0.7454	0.859066	0.0687286	0.62065	0.774375	0.00049426	0.99405	0.996107	0.059723	0.6714	0.810307
MAC_00452	Serine/threonine-protein phosphatase	121.519	5.76647	100.198	10.8124	105.304	10.8772	106.387	14.6107	97.0296	4.75858	107.382	9.01871	-0.278336	0.0247	0.0778039	-0.206624	0.09035	0.211558	-0.191865	0.1161	0.25427	-0.324691	0.0082	0.0316924	-0.178435	0.1387	0.289412	0.0717117	0.55465	0.725519	0.0864707	0.47635	0.662692	-0.0463548	0.69765	0.828165	0.0999008	0.4103	0.603593	0.014759	0.9017	0.950533	-0.118066	0.32665	0.52161	0.0281891	0.8127	0.899907
MAC_00453	Uncharacterized protein	14.245	0.348992	19.0578	0.885334	18.0315	0.605767	17.3431	0.291252	16.1624	0.750382	15.945	1.11223	0.419922	0.00785	0.0305982	0.340057	0.0312	0.0936828	0.283902	0.0744	0.182811	0.182184	0.2518	0.438971	0.162643	0.30355	0.496705	-0.0798652	0.60465	0.76281	-0.13602	0.37535	0.57028	-0.237739	0.1244	0.26738	-0.257279	0.0965	0.222175	-0.0561548	0.71205	0.837873	-0.157873	0.31215	0.505968	-0.177414	0.2537	0.441214
MAC_00454	ABC1 protein	73.4428	5.15213	71.1313	3.68157	56.1368	5.57296	58.8953	4.93533	51.4962	2.99514	51.5384	3.70043	-0.0461363	0.7084	0.8353	-0.387674	0.00135	0.00688777	-0.318468	0.00915	0.0347319	-0.512154	5e-05	0.000362775	-0.510972	0.0001	0.000686749	-0.341538	0.00505	0.0211474	-0.272332	0.0253	0.0793024	-0.466018	5e-05	0.000362775	-0.464836	0.0001	0.000686749	0.0692054	0.57415	0.740303	-0.12448	0.30765	0.501095	-0.123298	0.3142	0.508192
MAC_00455	Uncharacterized protein	84.5162	1.50243	63.0987	8.20997	55.843	18.2706	81.0176	6.26659	82.5824	9.91519	92.2926	10.2127	-0.421618	0.01555	0.0535233	-0.597851	0.00105	0.00553695	-0.0609929	0.71895	0.842551	-0.0333934	0.8428	0.916967	0.126987	0.45195	0.641455	-0.176233	0.3439	0.539477	0.360625	0.0405	0.114864	0.388224	0.02715	0.0838967	0.548604	0.0021	0.0100834	0.536858	0.0029	0.013262	0.564457	0.002	0.00967343	0.724837	0.0001	0.000686749
MAC_00456	Phosphoprotein phosphatase	14.4847	0.56763	12.6821	1.96041	11.0802	1.41341	11.274	3.77246	10.9748	3.05853	14.3667	3.38721	-0.191735	0.2926	0.484832	-0.386546	0.0384	0.110332	-0.361533	0.05155	0.138412	-0.400342	0.0305	0.0920005	-0.0118085	0.94345	0.972338	-0.194812	0.30075	0.49374	-0.169799	0.3703	0.565285	-0.208607	0.27105	0.460788	0.179926	0.3263	0.521245	0.0250133	0.8968	0.947785	-0.0137951	0.9381	0.96961	0.374738	0.0434	0.121259
MAC_00457	Elongation factor 1-gamma	1716.13	95.4708	1465.47	129.963	1382.36	183.151	1609.31	105.919	1386.21	53.1174	1586.22	156.536	-0.227802	0.2279	0.410658	-0.312031	0.09735	0.223553	-0.0927171	0.6276	0.779311	-0.308014	0.10435	0.235286	-0.113569	0.55715	0.727436	-0.0842282	0.6502	0.795617	0.135085	0.46865	0.655992	-0.0802119	0.6656	0.806436	0.114234	0.5429	0.716369	0.219314	0.2404	0.425578	0.00401625	0.9813	0.990052	0.198462	0.28805	0.479835
MAC_00458	37S ribosomal protein S9	314.021	18.585	278.326	15.7038	222.701	25.5896	262.029	15.2989	268.691	22.5425	295.541	10.4765	-0.174088	0.1532	0.310763	-0.495752	5e-05	0.000362775	-0.261132	0.03405	0.100387	-0.224914	0.06515	0.165575	-0.0875035	0.47635	0.662692	-0.321664	0.00885	0.0337869	-0.0870443	0.47965	0.66552	-0.0508258	0.6828	0.818217	0.0865843	0.48245	0.667901	0.23462	0.05845	0.152384	0.270838	0.02875	0.0878591	0.408248	0.001	0.00530838
MAC_00459	Uncharacterized protein	13.7206	1.3717	10.1959	5.57716	1.54197	0.256043	2.37286	0.35013	1.95009	1.08535	2.87182	0.574327	-0.428347	0.02825	0.0866183	-3.1535	5e-05	0.000362775	-2.53165	5e-05	0.000362775	-2.81473	5e-05	0.000362775	-2.25631	5e-05	0.000362775	-2.72515	5e-05	0.000362775	-2.1033	5e-05	0.000362775	-2.38638	5e-05	0.000362775	-1.82796	5e-05	0.000362775	0.62185	0.0877	0.20693	0.338768	0.3634	0.558313	0.89719	0.0142	0.0497
MAC_00460	Calcineurin regulatory subunit B	350.575	45.3995	319.87	27.7414	306.868	6.23944	269.898	9.35781	239.721	6.51253	292.978	32.029	-0.132238	0.3027	0.495843	-0.192108	0.1341	0.282538	-0.37731	0.00395	0.0172033	-0.548369	5e-05	0.000362775	-0.25893	0.04675	0.128337	-0.0598704	0.64265	0.790178	-0.245072	0.0602	0.155895	-0.416132	0.0015	0.00754603	-0.126692	0.32795	0.522974	-0.185202	0.15465	0.312903	-0.356261	0.007	0.0278556	-0.0668221	0.60705	0.764543
MAC_00461	Enhancer of polycomb-like protein	71.5675	2.62957	74.6981	5.68621	61.8566	3.92453	70.2395	4.59219	67.7668	1.50315	71.7617	2.00922	0.0617661	0.61665	0.771411	-0.210377	0.0885	0.208383	-0.027022	0.82165	0.904978	-0.0787266	0.5253	0.702517	0.00390941	0.97535	0.987146	-0.272144	0.02685	0.0831431	-0.0887882	0.46385	0.651906	-0.140493	0.25135	0.438407	-0.0578567	0.63395	0.784028	0.183355	0.135	0.283867	0.131651	0.28535	0.476876	0.214287	0.0808	0.194767
MAC_00462	O-sialoglycoprotein endopeptidase	29.1893	1.28876	32.7254	1.7636	34.5005	5.40256	26.4834	3.22086	23.751	0.632468	30.3128	3.60668	0.164974	0.31655	0.510645	0.241178	0.13675	0.286424	-0.140348	0.4075	0.601215	-0.297449	0.08065	0.194474	0.054491	0.7415	0.856531	0.0762032	0.63025	0.7813	-0.305322	0.06615	0.167446	-0.462424	0.0063	0.0255056	-0.110483	0.4956	0.678781	-0.381525	0.02175	0.0701524	-0.538627	0.00125	0.00644361	-0.186687	0.25025	0.437175
MAC_00463	Snf1 kinase complex beta-subunit Gal83, putative	43.7611	5.39036	59.4829	11.0705	80.206	3.05788	46.1353	5.2371	42.443	3.67585	55.6917	6.4699	0.442828	0.0008	0.00436954	0.874063	5e-05	0.000362775	0.0762244	0.5515	0.7232	-0.0441207	0.7293	0.848733	0.347815	0.007	0.0278556	0.431236	0.0009	0.00484136	-0.366603	0.00485	0.0204475	-0.486948	0.0002	0.00128619	-0.0950125	0.4554	0.644433	-0.797839	5e-05	0.000362775	-0.918184	5e-05	0.000362775	-0.526248	5e-05	0.000362775
MAC_00464	Methionine permease, putative	16.9502	0.528049	19.9133	0.1463	20.0244	1.0105	17.5818	2.25308	18.8842	1.65195	17.6451	0.311377	0.23243	0.1296	0.275652	0.240455	0.1163	0.254587	0.0527831	0.74105	0.856242	0.155876	0.3146	0.508534	0.057966	0.71245	0.838083	0.00802469	0.9531	0.976758	-0.179647	0.236	0.420414	-0.0765546	0.6186	0.772817	-0.174464	0.25435	0.441863	-0.187672	0.2188	0.399555	-0.0845793	0.58	0.744583	-0.182489	0.2365	0.420997
MAC_00465	Uncharacterized protein	4.23039	1.07766	5.27312	0.923891	6.42128	0.759456	6.92151	1.49444	5.98197	1.11086	6.26085	1.51796	0.317865	0.21725	0.397675	0.602068	0.01855	0.061727	0.710295	0.00625	0.0253328	0.499828	0.0488	0.132651	0.565567	0.02685	0.0831431	0.284203	0.2296	0.412616	0.39243	0.1002	0.228362	0.181963	0.45385	0.64311	0.247702	0.29845	0.491228	0.108227	0.63165	0.782396	-0.10224	0.65555	0.799514	-0.0365014	0.87485	0.935535
MAC_00466	Uncharacterized protein	16.1328	1.7955	15.2919	1.27222	19.8531	1.21372	18.3378	2.59616	18.8564	1.82116	16.7087	0.961422	-0.0772283	0.575	0.740915	0.299367	0.0307	0.0924783	0.184823	0.1781	0.345896	0.225057	0.09895	0.226292	0.0506005	0.7132	0.8386	0.376596	0.00825	0.031849	0.262051	0.0596	0.154676	0.302286	0.03025	0.0914481	0.127829	0.36215	0.556922	-0.114544	0.39675	0.591045	-0.07431	0.58245	0.746396	-0.248767	0.0696	0.173897
MAC_00467	Uncharacterized protein	4.02915	1.49169	8.28259	2.25554	7.42879	0.996948	6.72985	1.86787	5.23687	0.706701	6.53541	1.57884	1.03961	0.00275	0.0126842	0.882653	0.00975	0.0365655	0.7401	0.0302	0.0913214	0.378231	0.2616	0.450327	0.697803	0.03955	0.112818	-0.156954	0.56555	0.733792	-0.299506	0.28795	0.479733	-0.661376	0.0274	0.0845097	-0.341804	0.2258	0.40805	-0.142553	0.61795	0.772315	-0.504422	0.09265	0.215553	-0.18485	0.5132	0.692813
MAC_00468	Serine/threonine-protein kinase bur-1	38.6841	1.56215	42.6328	1.61917	40.4362	3.36225	38.8955	2.35814	40.297	0.355302	38.5175	1.56255	0.140223	0.27215	0.462045	0.0639079	0.62245	0.775602	0.00786258	0.9495	0.975036	0.0589316	0.6443	0.791409	-0.00622558	0.96015	0.980325	-0.0763152	0.5511	0.722912	-0.13236	0.30155	0.494636	-0.0812915	0.5217	0.69965	-0.146449	0.2503	0.437244	-0.0560453	0.6597	0.802358	-0.00497631	0.9679	0.983751	-0.0701334	0.5828	0.746644
MAC_00469	L-asparaginase	11.6389	1.04208	14.0196	3.05535	8.62287	0.669206	10.2422	0.959725	8.59188	0.888061	12.7353	2.37973	0.268485	0.0916	0.213705	-0.432717	0.01055	0.039005	-0.18443	0.26295	0.451782	-0.437912	0.0096	0.0361107	0.12987	0.4191	0.611751	-0.701201	5e-05	0.000362775	-0.452914	0.0055	0.0227569	-0.706396	5e-05	0.000362775	-0.138614	0.37875	0.573492	0.248287	0.1463	0.300658	-0.00519482	0.97025	0.984964	0.562587	0.0007	0.00389376
MAC_00470	Ubiquitin hydrolase, putative	77.5185	2.30453	85.5422	5.58163	89.5298	5.74466	68.5918	3.8334	64.8989	4.22133	61.3418	2.47517	0.142095	0.25335	0.440839	0.207827	0.0978	0.224252	-0.176504	0.15495	0.313327	-0.256346	0.0397	0.113155	-0.33767	0.0057	0.0234643	0.0657323	0.59835	0.758136	-0.318599	0.00985	0.0368694	-0.398441	0.0013	0.00666464	-0.479766	0.0001	0.000686749	-0.384332	0.0023	0.0108941	-0.464173	0.0001	0.000686749	-0.545498	5e-05	0.000362775
MAC_00471	Kinase	15.8789	2.55178	24.2365	3.29285	14.3908	2.33048	11.7652	0.791324	14.0341	1.0701	15.3928	2.63189	0.610068	0.0002	0.00128619	-0.141959	0.37835	0.573102	-0.432591	0.01175	0.0425467	-0.178177	0.2727	0.462626	-0.0448511	0.7748	0.876814	-0.752027	5e-05	0.000362775	-1.04266	5e-05	0.000362775	-0.788245	5e-05	0.000362775	-0.654919	5e-05	0.000362775	-0.290631	0.0856	0.203267	-0.0362181	0.82775	0.908296	0.0971083	0.55095	0.722784
MAC_00472	Cell division control protein 12	533.25	27.2378	413.296	12.9333	407.862	22.1612	482.635	10.5453	519.268	21.8118	538.121	26.2095	-0.367634	0.0047	0.0199211	-0.386729	0.0034	0.0151641	-0.143878	0.28	0.470933	-0.0383309	0.77715	0.878339	0.0131192	0.9216	0.960856	-0.0190945	0.8825	0.93996	0.223756	0.08985	0.210669	0.329303	0.01295	0.0460516	0.380753	0.00455	0.019383	0.242851	0.0618	0.159134	0.348398	0.0094	0.0354979	0.399848	0.003	0.0136591
MAC_00473	Periodic tryptophan protein 2	56.098	4.7361	43.7317	11.1805	41.3963	9.10833	69.972	7.45072	69.3075	5.5719	69.5701	5.37213	-0.359269	0.00405	0.0175682	-0.438448	0.0002	0.00128619	0.318828	0.0086	0.0329914	0.305062	0.01245	0.0445806	0.310518	0.01155	0.0419702	-0.0791798	0.5198	0.698072	0.678096	5e-05	0.000362775	0.66433	5e-05	0.000362775	0.669787	5e-05	0.000362775	0.757276	5e-05	0.000362775	0.74351	5e-05	0.000362775	0.748966	5e-05	0.000362775
MAC_00474	HypA-like protein, putative	1.38001	0.813676	1.66901	0.358382	2.23145	0.185527	2.67935	0.652505	2.50993	0.446131	2.41939	1.18142	0.274312	0.41805	0.610698	0.693298	0.0343	0.100921	0.957204	0.00455	0.019383	0.862966	0.0089	0.0339351	0.809964	0.01385	0.048657	0.418986	0.1667	0.33016	0.682892	0.02355	0.0748503	0.588654	0.0519	0.139138	0.535652	0.0801	0.193477	0.263905	0.331	0.52626	0.169668	0.5452	0.718178	0.116666	0.6787	0.815369
MAC_00475	NAP family protein	404.677	24.1768	286.006	69.167	155.159	36.4254	323.911	46.826	255.487	18.9024	330.98	33.0202	-0.500725	0.0002	0.00128619	-1.38303	5e-05	0.000362775	-0.321173	0.0092	0.034894	-0.663523	5e-05	0.000362775	-0.290029	0.01965	0.064627	-0.8823	5e-05	0.000362775	0.179552	0.15405	0.31205	-0.162798	0.18925	0.36096	0.210695	0.0925	0.215321	1.06185	5e-05	0.000362775	0.719502	5e-05	0.000362775	1.093	5e-05	0.000362775
MAC_00476	Copper homeostasis protein cutC	62.0404	9.3106	79.1361	13.2167	29.9776	11.0406	21.3512	5.70269	30.2123	7.95335	37.4365	8.63	0.351128	0.0088	0.0336301	-1.04932	5e-05	0.000362775	-1.53889	5e-05	0.000362775	-1.03807	5e-05	0.000362775	-0.728764	5e-05	0.000362775	-1.40045	5e-05	0.000362775	-1.89002	5e-05	0.000362775	-1.3892	5e-05	0.000362775	-1.07989	5e-05	0.000362775	-0.48957	0.0036	0.0159129	0.0112496	0.9453	0.973224	0.320559	0.04035	0.114561
MAC_00477	Protein tyrosine phosphatase	18.1963	2.14295	18.5133	0.265604	20.0351	0.468805	20.8595	1.6546	23.153	2.04298	19.6656	1.70895	0.0249177	0.86085	0.927675	0.138886	0.31355	0.507483	0.197056	0.15685	0.315957	0.347556	0.01265	0.0451513	0.112026	0.423	0.615466	0.113969	0.40695	0.600717	0.172138	0.21115	0.389824	0.322639	0.01805	0.060404	0.087108	0.53435	0.70961	0.0581697	0.66935	0.80901	0.20867	0.12085	0.261579	-0.0268605	0.8445	0.918094
MAC_00478	Queuine tRNA-ribosyltransferase accessory subunit 2	84.9571	3.14442	76.9573	3.35795	68.4919	6.21975	81.6194	4.82978	82.9614	8.64971	83.4154	2.87162	-0.142676	0.246	0.432318	-0.310801	0.01185	0.0428489	-0.0578221	0.64015	0.788327	-0.0342941	0.7795	0.879717	-0.0264198	0.8303	0.909674	-0.168125	0.1718	0.337149	0.0848534	0.4924	0.676147	0.108381	0.38075	0.5754	0.116256	0.3427	0.538389	0.252978	0.03985	0.113481	0.276507	0.0265	0.0822742	0.284381	0.02115	0.0685833
MAC_00479	LCCL domain containing protein	27.1574	1.25235	36.9157	0.50311	34.097	3.40464	34.6063	2.25287	35.5882	2.4657	33.5663	2.30614	0.442888	0.0008	0.00436954	0.328302	0.0113	0.0412618	0.349689	0.0068	0.0271884	0.390056	0.0028	0.0128752	0.305668	0.0193	0.0637082	-0.114587	0.36705	0.562013	-0.0931996	0.4559	0.644935	-0.0528326	0.6712	0.810199	-0.13722	0.28045	0.47146	0.021387	0.86635	0.930717	0.061754	0.62065	0.774375	-0.0226338	0.85755	0.925787
MAC_00480	Uncharacterized protein	36.3334	3.87475	42.0425	2.98018	37.9156	1.79968	36.1547	1.93765	38.9403	1.02955	40.5544	6.76884	0.210552	0.16295	0.324989	0.0614935	0.6845	0.819394	-0.00711537	0.96535	0.982611	0.0999673	0.50685	0.687732	0.158562	0.30065	0.493622	-0.149058	0.31675	0.510849	-0.217667	0.1482	0.303405	-0.110584	0.4574	0.646257	-0.0519898	0.72835	0.848183	-0.0686088	0.6534	0.797979	0.0384739	0.79715	0.890574	0.0970685	0.51825	0.696863
MAC_00481	Spindle pole body component	16.1824	0.755924	17.5116	0.885906	25.9127	0.750085	22.88	1.00168	22.4557	1.00476	22.3763	0.428896	0.113885	0.396	0.590316	0.679233	5e-05	0.000362775	0.499661	0.0003	0.00184856	0.472653	0.00055	0.00315471	0.467542	0.00065	0.00364841	0.565347	5e-05	0.000362775	0.385776	0.0039	0.0170189	0.358768	0.007	0.0278556	0.353656	0.0077	0.0301135	-0.179572	0.1629	0.32493	-0.20658	0.1101	0.244726	-0.211691	0.1024	0.232092
MAC_00482	Alpha-1,2-mannosyltransferase	41.6916	1.90572	45.9194	6.20933	53.3602	3.26405	52.0151	2.42485	50.2823	2.39862	49.4624	2.41992	0.139346	0.2917	0.483791	0.356007	0.0079	0.0307613	0.319174	0.017	0.0575151	0.270293	0.0402	0.114211	0.246575	0.0642	0.163772	0.216661	0.0998	0.227721	0.179828	0.1696	0.334228	0.130947	0.3142	0.508192	0.107229	0.41535	0.608261	-0.0368328	0.7746	0.876763	-0.0857137	0.50715	0.687922	-0.109431	0.40385	0.597815
MAC_00483	PQ loop repeat protein	34.9671	3.68294	43.9139	1.89456	40.4632	3.53795	54.3982	3.36634	48.2029	3.49362	50.5698	2.62566	0.328678	0.02285	0.0729927	0.21061	0.14935	0.305037	0.637559	5e-05	0.000362775	0.463121	0.00155	0.00776179	0.532276	0.00045	0.00264476	-0.118069	0.4115	0.604651	0.30888	0.02715	0.0838967	0.134443	0.3377	0.533112	0.203598	0.1458	0.299937	0.426949	0.0028	0.0128752	0.252511	0.075	0.183962	0.321667	0.0226	0.0723278
MAC_00484	Uncharacterized protein	8.60146	1.31019	9.88581	1.82912	7.94323	0.84272	8.56388	2.90025	8.9653	0.156736	8.97873	1.27724	0.200779	0.31145	0.505195	-0.114855	0.58235	0.746306	-0.0063161	0.98285	0.990812	0.0597706	0.76805	0.872906	0.0619311	0.76055	0.868491	-0.315634	0.1175	0.25642	-0.207095	0.29595	0.48849	-0.141008	0.4767	0.662942	-0.138848	0.4795	0.665379	0.108539	0.60405	0.762362	0.174626	0.39735	0.591571	0.176786	0.3891	0.583702
MAC_00485	Methylenetetrahydrofolate reductase	64.3771	6.44602	56.2357	2.4552	62.7569	1.91086	65.1032	3.6745	60.1383	2.42026	66.0892	4.43941	-0.195062	0.11135	0.246689	-0.036773	0.7641	0.8705	0.0161805	0.89245	0.945323	-0.0982627	0.4159	0.608801	0.0378678	0.7573	0.866442	0.158289	0.1967	0.371012	0.211243	0.08645	0.204754	0.0967995	0.427	0.619056	0.23293	0.05645	0.148317	0.0529535	0.66215	0.804041	-0.0614897	0.6128	0.768859	0.0746408	0.5414	0.715133
MAC_00486	Leucyl-tRNA synthetase	49.5201	1.81208	45.8816	5.14867	22.9146	2.32222	26.7729	0.733341	30.0788	1.55162	31.8271	1.34284	-0.110099	0.36565	0.560607	-1.11174	5e-05	0.000362775	-0.88724	5e-05	0.000362775	-0.719266	5e-05	0.000362775	-0.63776	5e-05	0.000362775	-1.00165	5e-05	0.000362775	-0.777142	5e-05	0.000362775	-0.609167	5e-05	0.000362775	-0.527661	5e-05	0.000362775	0.224504	0.0774	0.18847	0.392479	0.00215	0.0102874	0.473985	0.00025	0.00157207
MAC_00487	Uncharacterized protein	0.0747629	0.129493	0.270094	0.325651	0	0	0.290826	0.111781	0.0641086	0.111039	0.0555683	0.0962472	1.85307	1	1	#NAME?	1	1	1.95976	1	1	-0.221803	1	1	-0.428059	1	1	#NAME?	1	1	0.106696	1	1	-2.07487	1	1	-2.28113	1	1	inf	1	1	inf	1	1	inf	1	1
MAC_00488	Cystinosin	17.0022	1.62263	18.747	5.07216	13.188	1.35546	9.12683	1.81294	8.77579	1.33935	7.18997	1.34451	0.140945	0.43365	0.624868	-0.366493	0.04765	0.130239	-0.897532	5e-05	0.000362775	-0.954117	5e-05	0.000362775	-1.24166	5e-05	0.000362775	-0.507437	0.00695	0.0277009	-1.03848	5e-05	0.000362775	-1.09506	5e-05	0.000362775	-1.3826	5e-05	0.000362775	-0.53104	0.0087	0.0333083	-0.587624	0.0045	0.0192068	-0.875167	0.00015	0.000993023
MAC_00489	Uncharacterized protein	17.2672	11.9907	10.6521	5.39089	16.4266	6.18395	12.058	7.90314	16.9343	4.69377	22.069	22.3746	-0.696903	0.00175	0.00861936	-0.0720036	0.7214	0.844071	-0.518044	0.01755	0.0590244	-0.0280854	0.8856	0.941586	0.353988	0.087	0.205692	0.624899	0.0044	0.0188498	0.178858	0.4242	0.616462	0.668817	0.0025	0.011687	1.05089	5e-05	0.000362775	-0.446041	0.0365	0.105996	0.0439183	0.82465	0.906581	0.425991	0.03765	0.108598
MAC_00490	Uncharacterized protein	79.4163	1.838	76.8895	23.5096	69.0601	10.265	60.8568	17.4091	71.1288	11.4082	47.2629	4.29453	-0.0466489	0.7396	0.855321	-0.201582	0.16355	0.325809	-0.384017	0.00825	0.031849	-0.159	0.27185	0.461681	-0.748727	5e-05	0.000362775	-0.154933	0.28365	0.474954	-0.337368	0.02205	0.070905	-0.112352	0.4383	0.629113	-0.702078	5e-05	0.000362775	-0.182434	0.2189	0.399655	0.0425819	0.7728	0.875602	-0.547145	0.0006	0.00340137
MAC_00491	Mitochondrial carrier protein, putative	63.5966	2.70645	45.5864	11.4392	25.5434	6.89436	40.9462	3.03309	44.1174	3.39191	47.2947	3.8756	-0.480345	0.0001	0.000686749	-1.316	5e-05	0.000362775	-0.635219	5e-05	0.000362775	-0.527601	5e-05	0.000362775	-0.427272	0.0003	0.00184856	-0.835655	5e-05	0.000362775	-0.154874	0.2181	0.398715	-0.0472554	0.7044	0.832611	0.0530736	0.66645	0.807049	0.680781	5e-05	0.000362775	0.788399	5e-05	0.000362775	0.888728	5e-05	0.000362775
MAC_00492	G2/mitotic-specific cyclin (Clb3), putative	18.674	1.5902	23.4699	2.33052	37.5321	1.48842	40.1797	1.71985	31.3157	2.64999	29.8423	3.9977	0.329779	0.0187	0.0621248	1.00709	5e-05	0.000362775	1.10543	5e-05	0.000362775	0.745855	5e-05	0.000362775	0.676323	5e-05	0.000362775	0.677312	5e-05	0.000362775	0.775656	5e-05	0.000362775	0.416076	0.00195	0.00946249	0.346544	0.0085	0.0326571	0.0983437	0.4431	0.633308	-0.261236	0.0427	0.119788	-0.330767	0.0117	0.0423964
MAC_00493	C6 finger domain protein, putative	20.1891	1.90406	21.6343	3.04796	18.7442	2.81249	17.9389	1.48813	17.9187	0.82911	17.2807	2.49538	0.0997414	0.4635	0.651539	-0.107137	0.43605	0.62707	-0.170484	0.22005	0.401037	-0.172109	0.21635	0.396576	-0.224417	0.10685	0.239422	-0.206878	0.13765	0.287772	-0.270225	0.05415	0.143758	-0.27185	0.05345	0.142331	-0.324158	0.0204	0.0666288	-0.0633469	0.65385	0.798379	-0.0649722	0.64445	0.791515	-0.11728	0.4054	0.599268
MAC_00494	Integral membrane family protein	20.5695	2.31821	31.9778	8.3248	21.6254	2.7559	30.0649	7.70152	27.6331	4.12979	30.1842	3.82361	0.636562	0.0001	0.000686749	0.0722188	0.6614	0.803538	0.547573	0.0011	0.00576616	0.425889	0.0095	0.035793	0.553282	0.00085	0.00460684	-0.564343	0.00075	0.00413583	-0.0889887	0.5585	0.72845	-0.210673	0.1712	0.3363	-0.0832798	0.58145	0.745744	0.475354	0.00375	0.0164672	0.35367	0.0299	0.0906256	0.481063	0.00315	0.0142182
MAC_00495	DNA-directed RNA polymerase III RPC4, putative	27.434	3.98215	28.6681	9.12383	28.6685	5.653	36.2824	3.75396	36.518	2.02771	41.6403	3.99573	0.0634843	0.63515	0.784896	0.0635018	0.6322	0.782727	0.403306	0.00265	0.0122799	0.412645	0.00245	0.0114878	0.602017	5e-05	0.000362775	1.74479e-05	0.99605	0.997268	0.339821	0.01105	0.0405309	0.349161	0.0103	0.0382592	0.538533	0.0001	0.000686749	0.339804	0.0102	0.0379591	0.349143	0.00975	0.0365655	0.538515	0.0001	0.000686749
MAC_00496	Urease accessory protein UreD	71.2333	1.91168	81.6444	6.14681	82.7926	2.71687	84.9857	4.704	86.7978	2.70441	83.863	5.44002	0.196801	0.1165	0.254872	0.216949	0.0846	0.201488	0.254669	0.0457	0.126153	0.285107	0.0238	0.0754829	0.235482	0.06135	0.158247	0.020148	0.87415	0.935189	0.0578675	0.64515	0.791984	0.0883059	0.4789	0.66485	0.0386807	0.76005	0.868191	0.0377195	0.7615	0.869034	0.0681579	0.58365	0.747225	0.0185327	0.8828	0.940103
MAC_00497	Putative nuclear protein SA-1	35.9765	0.0931877	40.212	2.97591	48.639	3.52441	46.2053	1.33664	47.0456	0.886814	43.3097	1.62619	0.160574	0.1883	0.359693	0.435062	0.00035	0.00212064	0.361005	0.0022	0.0104899	0.387007	0.00135	0.00688777	0.267636	0.0283	0.0867374	0.274487	0.0213	0.0689727	0.20043	0.095	0.2196	0.226433	0.05845	0.152384	0.107062	0.38045	0.575128	-0.0740569	0.53735	0.711884	-0.0480542	0.68655	0.820798	-0.167426	0.1636	0.325898
MAC_00498	Telomere-binding alpha subunit central domain-containing protein	23.0135	1.63681	22.0307	2.022	27.0034	1.45172	29.364	1.0166	32.3612	2.51951	29.6809	1.13821	-0.0629689	0.63715	0.786298	0.230659	0.0794	0.192182	0.351567	0.00785	0.0305982	0.491782	0.00035	0.00212064	0.367052	0.0049	0.0206171	0.293628	0.02805	0.0861281	0.414536	0.0017	0.00840203	0.554751	5e-05	0.000362775	0.430021	0.0012	0.00621755	0.120908	0.34665	0.542096	0.261123	0.04295	0.120286	0.136393	0.2857	0.477243
MAC_00499	Importin subunit alpha	232.785	18.5802	217.495	20.796	250.123	28.6745	248.302	8.57774	229.201	15.3731	269.084	15.7697	-0.0980137	0.43675	0.627728	0.103641	0.41295	0.605994	0.0930973	0.4628	0.650923	-0.0223826	0.86085	0.927675	0.209063	0.10395	0.234639	0.201654	0.1149	0.252379	0.191111	0.1309	0.277696	0.0756311	0.5538	0.724857	0.307076	0.0171	0.057789	-0.0105434	0.9342	0.967572	-0.126023	0.3262	0.521132	0.105422	0.412	0.605114
MAC_00500	DEAD/DEAH box helicase	15.627	1.1399	16.0265	1.3338	17.6578	1.18104	19.8852	1.68062	20.9358	1.027	19.9873	1.43699	0.0364168	0.78125	0.880909	0.176263	0.16395	0.326366	0.347658	0.00605	0.0246474	0.42193	0.00065	0.00364841	0.355045	0.0046	0.0195686	0.139846	0.27005	0.459672	0.311241	0.01435	0.0500996	0.385513	0.0021	0.0100834	0.318629	0.0115	0.0418227	0.171395	0.17025	0.335106	0.245668	0.04535	0.125365	0.178783	0.1505	0.306756
MAC_00501	Aprataxin-like protein	17.0687	1.20983	14.5319	1.67235	19.9516	2.4888	20.5434	1.17664	20.2333	0.506065	19.5003	4.05301	-0.232127	0.19615	0.370255	0.225151	0.1906	0.362817	0.267326	0.1166	0.255033	0.24538	0.15375	0.311619	0.192144	0.2681	0.457504	0.457279	0.00945	0.0356434	0.499453	0.0045	0.0192068	0.477508	0.00655	0.026342	0.424271	0.01765	0.0593047	0.0421746	0.80165	0.893027	0.0202289	0.90665	0.953095	-0.0330076	0.8451	0.918506
MAC_00502	Uncharacterized protein	435.793	11.8977	392.873	28.0652	442.95	21.0588	542.301	55.7159	493.934	27.8388	443.69	19.4977	-0.149583	0.21215	0.39113	0.0235009	0.8482	0.920356	0.315448	0.00985	0.0368694	0.180675	0.1343	0.282821	0.0259074	0.83345	0.911584	0.173084	0.15145	0.308157	0.465031	0.0001	0.000686749	0.330258	0.00735	0.0289962	0.175491	0.1483	0.303545	0.291947	0.0167	0.0566913	0.157174	0.19665	0.370963	0.00240649	0.98435	0.991642
MAC_00503	Kinesin-like protein	68.2839	3.23215	64.8867	3.94759	86.1912	4.37319	102.758	3.02962	73.6362	0.381189	77.1427	5.56436	-0.073623	0.5516	0.723293	0.335995	0.00585	0.0239684	0.58963	5e-05	0.000362775	0.108871	0.37545	0.570348	0.175985	0.1495	0.305268	0.409618	0.00095	0.00507718	0.663253	5e-05	0.000362775	0.182494	0.14235	0.294922	0.249608	0.0425	0.119356	0.253635	0.03485	0.102196	-0.227124	0.0653	0.165854	-0.16001	0.18945	0.361225
MAC_00504	NlpC/P60-like cell-wall peptidase, putative	17.2551	1.23607	18.8255	3.18571	18.0642	0.469784	16.5906	0.261505	17.715	0.230194	14.4154	0.641744	0.125662	0.41025	0.603576	0.0661095	0.6617	0.80369	-0.0566581	0.713	0.838452	0.0379513	0.8065	0.895968	-0.25941	0.0973	0.223472	-0.0595526	0.6971	0.827812	-0.18232	0.23465	0.418771	-0.0877108	0.5706	0.737606	-0.385072	0.0138	0.0485142	-0.122768	0.42495	0.617083	-0.0281582	0.8527	0.922784	-0.325519	0.0353	0.103229
MAC_00505	Uncharacterized protein	71.0638	9.07931	44.0857	6.56427	37.368	3.04532	44.5923	7.22593	47.0658	2.01451	45.161	5.47058	-0.688804	5e-05	0.000362775	-0.927313	5e-05	0.000362775	-0.672321	5e-05	0.000362775	-0.594437	0.0001	0.000686749	-0.654039	5e-05	0.000362775	-0.23851	0.1427	0.295391	0.016483	0.91545	0.957686	0.0943661	0.54435	0.717476	0.0347645	0.8272	0.908005	0.254993	0.1124	0.248343	0.332876	0.0372	0.107609	0.273274	0.08885	0.20895
MAC_00506	Putative translation initiation factor 4e	75.2412	12.0273	56.705	9.37269	75.7602	9.92351	63.1694	6.63871	74.0327	8.60371	81.4624	13.6893	-0.408048	0.00275	0.0126842	0.00991699	0.939	0.969977	-0.252297	0.05895	0.153386	-0.0233617	0.86185	0.928062	0.114611	0.38085	0.575488	0.417965	0.00245	0.0114878	0.15575	0.2467	0.433169	0.384686	0.00435	0.0186704	0.522659	0.0001	0.000686749	-0.262214	0.0502	0.135624	-0.0332787	0.79925	0.891607	0.104694	0.4264	0.61846
MAC_00507	Calmodulin	40.4576	2.24985	40.0176	2.14366	42.5677	7.822	50.8799	4.54564	56.8645	3.01025	45.7864	4.75673	-0.015776	0.9256	0.962969	0.0733486	0.6559	0.799705	0.330685	0.0419	0.118012	0.491118	0.00215	0.0102874	0.178509	0.27305	0.463005	0.0891246	0.58415	0.747581	0.346461	0.03325	0.0984884	0.506894	0.0014	0.00710529	0.194285	0.2331	0.416997	0.257336	0.1097	0.244072	0.417769	0.0081	0.0313897	0.10516	0.51925	0.697688
MAC_00508	Hydroxyacylglutathione hydrolase, putative	139.439	6.34663	123.486	7.38809	122.16	1.3855	147.756	5.74912	135.622	9.39342	132.08	5.47043	-0.175285	0.18105	0.349813	-0.19086	0.14235	0.294922	0.0835838	0.51805	0.696677	-0.0400415	0.75545	0.865351	-0.0782285	0.549	0.72126	-0.0155746	0.9053	0.952376	0.258869	0.048	0.130971	0.135244	0.30475	0.497995	0.0970569	0.46175	0.649967	0.274444	0.0363	0.105573	0.150819	0.253	0.440409	0.112632	0.3878	0.582369
MAC_00509	Putative LAS1 protein	49.6717	1.03464	38.0019	5.62736	45.8055	4.89224	57.5552	4.26901	63.5785	2.14613	61.1952	3.42419	-0.386354	0.00555	0.0229348	-0.116904	0.3876	0.582139	0.212523	0.11135	0.246689	0.356115	0.0078	0.0304366	0.300994	0.02255	0.0722031	0.269449	0.0537	0.142819	0.598877	5e-05	0.000362775	0.742469	5e-05	0.000362775	0.687347	5e-05	0.000362775	0.329427	0.0147	0.0511036	0.47302	0.0005	0.0029	0.417898	0.0017	0.00840203
MAC_00510	Uncharacterized protein	11.0672	2.88261	16.7069	6.22739	48.8584	11.5726	53.5314	1.02379	64.1126	4.95366	62.265	2.28708	0.594163	0.0012	0.00621755	2.14232	5e-05	0.000362775	2.2741	5e-05	0.000362775	2.53432	5e-05	0.000362775	2.49214	5e-05	0.000362775	1.54816	5e-05	0.000362775	1.67994	5e-05	0.000362775	1.94016	5e-05	0.000362775	1.89797	5e-05	0.000362775	0.131779	0.3172	0.511362	0.392	0.00335	0.0149749	0.349814	0.0075	0.0294851
MAC_00511	PfkB family kinase, putative	15.0331	3.37926	14.4458	1.15021	15.7372	2.23095	18.0683	2.66538	18.2606	1.84775	24.4169	2.13711	-0.0574912	0.78575	0.883661	0.0660341	0.7562	0.865812	0.265318	0.1997	0.375017	0.280595	0.17445	0.34077	0.699738	0.0004	0.00238366	0.123525	0.5578	0.727956	0.32281	0.11795	0.257122	0.338086	0.1003	0.228502	0.757229	0.0003	0.00184856	0.199284	0.32835	0.523377	0.214561	0.28965	0.481649	0.633704	0.00165	0.008192
MAC_00512	Cytochrome P450 ClCP1	19.8193	3.30124	23.3236	4.29337	22.8972	2.79823	19.7122	1.5476	19.7895	1.68379	26.1719	4.32407	0.234881	0.102	0.231434	0.208263	0.1486	0.303974	-0.00782044	0.9582	0.979387	-0.00217308	0.9895	0.993957	0.401111	0.00515	0.0215076	-0.0266179	0.8549	0.924209	-0.242701	0.09255	0.215385	-0.237054	0.09965	0.2275	0.16623	0.243	0.428838	-0.216084	0.13015	0.276533	-0.210436	0.14175	0.293987	0.192848	0.17085	0.335873
MAC_00513	NAD kinase, putative	96.7218	2.31927	89.1871	3.24111	105.581	6.04495	83.0406	6.45394	89.2495	1.4233	106.544	3.47398	-0.117005	0.3355	0.530891	0.126442	0.3025	0.495646	-0.220023	0.06975	0.174181	-0.115996	0.3407	0.536222	0.139537	0.25035	0.437313	0.243447	0.0435	0.121457	-0.103018	0.3915	0.586115	0.00100859	0.9937	0.995981	0.256542	0.03205	0.0957085	-0.346466	0.00405	0.0175682	-0.242439	0.04205	0.118335	0.013095	0.9111	0.955545
MAC_00514	Uncharacterized protein	32.6472	3.49746	34.2367	4.17453	39.8883	2.31288	34.8801	3.56638	32.0033	1.73878	36.4577	1.11829	0.0685841	0.68095	0.816949	0.289008	0.07695	0.187657	0.0954477	0.5636	0.732361	-0.0287392	0.8618	0.928056	0.159267	0.3297	0.52483	0.220424	0.1676	0.331437	0.0268635	0.86655	0.930811	-0.0973233	0.55445	0.725357	0.0906826	0.57905	0.743808	-0.19356	0.22685	0.409329	-0.317747	0.0473	0.12947	-0.129741	0.4161	0.609001
MAC_00515	Glucose repressible protein Grg1	29.0945	0.871209	40.9983	23.5013	65.7534	11.0501	141.297	20.3623	35.9004	15.8008	8.88453	1.71505	0.494819	0.121	0.261822	1.17632	0.00055	0.00315471	2.27991	5e-05	0.000362775	0.303256	0.35105	0.546518	-1.71138	0.0038	0.016652	0.681502	0.01455	0.0506656	1.78509	5e-05	0.000362775	-0.191562	0.53075	0.706919	-2.2062	0.0004	0.00238366	1.10359	5e-05	0.000362775	-0.873065	0.00305	0.0138366	-2.8877	5e-05	0.000362775
MAC_00516	Uncharacterized protein	0.559013	0.591912	0.936249	0.452518	0.614568	0.444429	0.903043	0.367717	0.83153	0.416993	1.22096	0.476309	0.744011	1	1	0.136692	1	1	0.691914	1	1	0.572887	1	1	1.12706	1	1	-0.607318	1	1	-0.0520969	1	1	-0.171124	1	1	0.383053	1	1	0.555221	1	1	0.436194	1	1	0.990371	1	1
MAC_00517	Dolichyl pyrophosphate phosphatase	143.765	15.906	145.052	14.0036	103.46	5.0388	102.297	1.71103	97.2585	8.7537	91.8255	8.41039	0.0128628	0.9167	0.958502	-0.474636	0.0003	0.00184856	-0.490948	0.00015	0.000993023	-0.563815	5e-05	0.000362775	-0.646745	5e-05	0.000362775	-0.487499	0.00015	0.000993023	-0.503811	0.00015	0.000993023	-0.576678	5e-05	0.000362775	-0.659608	5e-05	0.000362775	-0.0163122	0.89805	0.94851	-0.0891795	0.49315	0.676743	-0.172109	0.1869	0.357788
MAC_00518	RING finger protein	23.9914	1.59264	30.1797	1.32741	27.965	1.38677	25.8214	1.7066	26.0118	0.737967	26.7269	1.26867	0.331057	0.0122	0.0438596	0.221105	0.08855	0.208462	0.106046	0.4208	0.613269	0.116649	0.3786	0.573369	0.155771	0.2365	0.420997	-0.109952	0.38665	0.581217	-0.225011	0.0812	0.195485	-0.214408	0.0983	0.225137	-0.175286	0.17875	0.346763	-0.115059	0.3775	0.572351	-0.104456	0.4228	0.615304	-0.0653342	0.61715	0.771772
MAC_00519	Transcription factor vib-1	209.164	15.3568	275.346	51.838	268.473	10.7386	257.007	12.977	291.005	7.04738	263.275	15.5615	0.396612	0.0032	0.0144079	0.360141	0.00635	0.0256696	0.297172	0.02485	0.0781676	0.476408	0.0005	0.0029	0.331935	0.01305	0.046341	-0.0364714	0.7922	0.887673	-0.0994403	0.46705	0.654658	0.0797955	0.5655	0.733757	-0.0646776	0.6388	0.787412	-0.0629689	0.6414	0.789233	0.116267	0.39445	0.588909	-0.0282062	0.8324	0.910924
MAC_00520	Uncharacterized protein	69.344	3.91778	63.2255	5.8664	54.8526	4.60478	68.3627	5.74061	70.7147	5.10638	65.1614	1.33661	-0.133265	0.30705	0.500406	-0.338211	0.0115	0.0418227	-0.020562	0.8733	0.934697	0.0282398	0.82985	0.909437	-0.0897539	0.49675	0.679645	-0.204947	0.1255	0.269107	0.112702	0.3965	0.590779	0.161504	0.2236	0.405417	0.0435106	0.7462	0.859535	0.317649	0.0189	0.0626538	0.366451	0.0058	0.0237988	0.248457	0.06695	0.168973
MAC_00521	Protein required for hyphal anastomosis (HAM-2)	46.9955	2.67524	43.9083	1.8643	50.2407	1.49134	42.5949	0.665071	44.6631	0.841481	45.1468	1.28428	-0.0980262	0.4167	0.609556	0.0963364	0.4224	0.614916	-0.14184	0.2443	0.43037	-0.0734383	0.5413	0.715085	-0.0578962	0.6347	0.784542	0.194363	0.10415	0.234963	-0.0438136	0.71845	0.842243	0.0245879	0.84095	0.915915	0.0401301	0.741	0.856208	-0.238176	0.04705	0.12895	-0.169775	0.1552	0.313685	-0.154233	0.20175	0.37772
MAC_00522	Uncharacterized protein	153.246	32.0195	83.6807	34.4979	60.8662	10.3875	78.0525	9.05526	63.3216	9.19843	62.0625	7.57114	-0.872884	5e-05	0.000362775	-1.33214	5e-05	0.000362775	-0.973334	5e-05	0.000362775	-1.27508	5e-05	0.000362775	-1.30406	5e-05	0.000362775	-0.459254	0.00095	0.00507718	-0.10045	0.4475	0.637356	-0.402196	0.00345	0.0153442	-0.431172	0.0014	0.00710529	0.358804	0.0067	0.0268524	0.0570583	0.67525	0.812967	0.0280815	0.83575	0.912856
MAC_00523	WSC domain containing protein	706.768	161.83	408.09	181.454	430.266	106.286	997.47	142.664	1087.46	342.676	1014.19	198.047	-0.792348	0.0001	0.000686749	-0.716006	0.0003	0.00184856	0.497037	0.02345	0.074601	0.621652	0.0119	0.042991	0.521018	0.01915	0.0633054	0.0763423	0.66515	0.806126	1.28939	5e-05	0.000362775	1.414	5e-05	0.000362775	1.31337	5e-05	0.000362775	1.21304	5e-05	0.000362775	1.33766	5e-05	0.000362775	1.23702	5e-05	0.000362775
MAC_00524	Uncharacterized protein	3.42413	1.6933	2.66075	0.19125	1.79431	0.125079	1.89666	0.0610192	2.89196	0.482026	3.73289	0.643286	-0.363907	0.1568	0.315877	-0.93231	0.00225	0.0106898	-0.852278	0.00305	0.0138366	-0.243693	0.3327	0.528072	0.124555	0.5997	0.759035	-0.568403	0.04935	0.133821	-0.488371	0.08185	0.196594	0.120214	0.63835	0.787115	0.488461	0.05085	0.136979	0.0800327	0.79025	0.88635	0.688617	0.01525	0.0526567	1.05686	0.0003	0.00184856
MAC_00525	Uncharacterized protein	427.468	35.4999	594.447	30.7045	500.232	32.0434	297.832	9.62936	106.876	24.8146	94.7213	21.5541	0.475729	0.00015	0.000993023	0.22678	0.0664	0.167905	-0.521319	0.0001	0.000686749	-1.99988	5e-05	0.000362775	-2.17406	5e-05	0.000362775	-0.248949	0.04255	0.119453	-0.997048	5e-05	0.000362775	-2.47561	5e-05	0.000362775	-2.64979	5e-05	0.000362775	-0.7481	5e-05	0.000362775	-2.22666	5e-05	0.000362775	-2.40084	5e-05	0.000362775
MAC_00526	Wd-repeat protein	15.4235	0.993711	15.0335	2.12218	20.5206	2.69098	18.6911	0.321748	20.0329	1.41949	18.0296	1.3949	-0.0369506	0.77	0.873965	0.411941	0.00065	0.00364841	0.277219	0.0275	0.0847698	0.377237	0.00225	0.0106898	0.225238	0.0735	0.181157	0.448891	0.00015	0.000993023	0.314169	0.0117	0.0423964	0.414188	0.0009	0.00484136	0.262188	0.03605	0.104961	-0.134722	0.2748	0.46499	-0.0347037	0.77885	0.879326	-0.186703	0.13315	0.28107
MAC_00527	Uncharacterized protein	2.50102	0.310738	1.61589	0.0337422	7.66482	2.57327	4.35633	0.694235	4.90657	0.856982	3.10428	0.662879	-0.630191	0.06935	0.173429	1.61573	5e-05	0.000362775	0.800594	0.0082	0.0316924	0.972198	0.00145	0.0073241	0.31174	0.29965	0.492506	2.24593	5e-05	0.000362775	1.43079	0.00015	0.000993023	1.60239	5e-05	0.000362775	0.941931	0.00695	0.0277009	-0.81514	0.0013	0.00666464	-0.643536	0.0068	0.0271884	-1.30399	5e-05	0.000362775
MAC_00528	Calcium-transporting ATPase	125.979	5.76588	156.393	14.4125	116.272	7.84711	125.422	10.6106	143.342	1.54352	145.448	19.2477	0.311995	0.0174	0.0586071	-0.115674	0.35725	0.552294	-0.00639232	0.96175	0.981055	0.186288	0.1423	0.294853	0.20732	0.1066	0.238995	-0.427669	0.00105	0.00553695	-0.318388	0.01665	0.056557	-0.125708	0.33545	0.530886	-0.104675	0.42515	0.617273	0.109282	0.3818	0.576413	0.301962	0.01765	0.0593047	0.322994	0.01195	0.0431415
MAC_00529	Proteasome component PUP3	209.825	5.18049	198.972	10.7213	190.675	3.58	204.14	17.7086	207.518	10.5354	185.881	8.55057	-0.0766221	0.53235	0.708027	-0.138075	0.2614	0.450089	-0.0396312	0.74645	0.859687	-0.0159524	0.89435	0.94632	-0.174805	0.1594	0.319815	-0.0614527	0.6193	0.773342	0.0369909	0.7595	0.867842	0.0606697	0.6198	0.773741	-0.0981833	0.42545	0.617557	0.0984436	0.4239	0.616249	0.122122	0.3192	0.513575	-0.0367306	0.76645	0.871924
MAC_00530	UBX domain protein, putative	35.9015	1.56536	34.6268	1.81223	37.0562	1.47621	29.2391	1.15095	28.404	0.659561	27.2787	1.41166	-0.0521556	0.69225	0.824539	0.0456687	0.7268	0.847314	-0.296149	0.0269	0.0832689	-0.33795	0.0118	0.0427028	-0.396273	0.0031	0.0140312	0.0978242	0.4563	0.645266	-0.243994	0.07175	0.177912	-0.285795	0.03425	0.100815	-0.344118	0.0113	0.0412618	-0.341818	0.01105	0.0405309	-0.383619	0.00465	0.0197441	-0.441942	0.00075	0.00413583
MAC_00531	60S ribosomal protein L36	3780.67	187.556	3615.59	282.218	3054.27	329.129	3256.97	79.1338	3050.29	142.028	3861.44	598.267	-0.0644099	0.6406	0.788631	-0.307811	0.0229	0.0731318	-0.215111	0.1112	0.246458	-0.309696	0.0231	0.0736665	0.0304999	0.8245	0.90652	-0.243401	0.07435	0.182738	-0.150701	0.2668	0.456011	-0.245286	0.07485	0.183666	0.0949098	0.4978	0.680543	0.0927	0.4886	0.672837	-0.00188533	0.98825	0.993295	0.338311	0.01235	0.0443092
MAC_00532	Thymidylate synthase	65.648	7.72835	73.5277	7.65585	107.339	2.84425	94.4993	5.6283	92.5778	6.87714	80.7197	2.94127	0.163537	0.2108	0.389363	0.709353	5e-05	0.000362775	0.525554	5e-05	0.000362775	0.495916	0.00015	0.000993023	0.29817	0.0198	0.0650172	0.545816	5e-05	0.000362775	0.362017	0.0047	0.0199211	0.332379	0.0094	0.0354979	0.134633	0.29	0.481974	-0.183799	0.13765	0.287772	-0.213437	0.08585	0.203732	-0.411183	0.0012	0.00621755
MAC_00533	Uncharacterized protein	6.15495	2.03741	5.68421	1.65595	7.20531	0.839197	7.18109	0.54467	6.76074	1.66597	8.5967	2.90885	-0.114787	0.6978	0.828264	0.227313	0.4212	0.613693	0.222457	0.42705	0.619107	0.135433	0.6318	0.782504	0.482035	0.08225	0.19733	0.3421	0.2265	0.408905	0.337243	0.23635	0.420833	0.25022	0.37875	0.573492	0.596822	0.03305	0.0980407	-0.00485669	0.97075	0.985175	-0.09188	0.7383	0.854413	0.254722	0.3448	0.540371
MAC_00534	Triacylglycerol lipase FGL2	40.1446	2.99892	73.9315	19.5357	108.86	2.05875	69.7475	8.64616	71.8083	3.71854	68.2923	4.54584	0.880983	5e-05	0.000362775	1.4392	5e-05	0.000362775	0.796936	5e-05	0.000362775	0.838945	5e-05	0.000362775	0.766516	5e-05	0.000362775	0.558215	5e-05	0.000362775	-0.084047	0.50535	0.68649	-0.0420382	0.7329	0.851013	-0.114467	0.35895	0.553897	-0.642262	5e-05	0.000362775	-0.600254	5e-05	0.000362775	-0.672682	5e-05	0.000362775
MAC_00535	14-3-3-like protein	976.144	15.0446	913.44	60.69	940.783	26.7889	918.287	17.0952	827.193	37.1964	945.638	41.3358	-0.0957851	0.4987	0.681264	-0.053232	0.7017	0.830801	-0.0881491	0.53575	0.710612	-0.23887	0.0828	0.198332	-0.0458061	0.7458	0.859328	0.0425531	0.7554	0.865326	0.00763605	0.9543	0.977464	-0.143085	0.2972	0.489884	0.049979	0.71885	0.842457	-0.034917	0.80135	0.892829	-0.185638	0.173	0.338793	0.00742591	0.95695	0.97868
MAC_00536	Uncharacterized protein	208.544	31.0357	236.555	67.1096	102.285	7.82284	71.6385	2.9872	106.468	16.2941	85.6728	17.9624	0.181824	0.15165	0.308458	-1.02775	5e-05	0.000362775	-1.54154	5e-05	0.000362775	-0.969927	5e-05	0.000362775	-1.28344	5e-05	0.000362775	-1.20957	5e-05	0.000362775	-1.72337	5e-05	0.000362775	-1.15175	5e-05	0.000362775	-1.46526	5e-05	0.000362775	-0.513792	0.00045	0.00264476	0.0578235	0.68365	0.818849	-0.25569	0.07055	0.175689
MAC_00537	SacI domain and endonuclease/exonuclease/phosphatase	32.8052	1.67681	35.7091	2.64456	26.8384	0.925514	24.7094	0.994263	23.7	0.663161	21.0646	2.24986	0.122369	0.30645	0.499749	-0.289626	0.0171	0.057789	-0.408867	0.00075	0.00413583	-0.469038	0.00025	0.00157207	-0.639105	5e-05	0.000362775	-0.411996	0.0006	0.00340137	-0.531236	5e-05	0.000362775	-0.591408	5e-05	0.000362775	-0.761475	5e-05	0.000362775	-0.119241	0.333	0.528393	-0.179412	0.14445	0.297894	-0.349479	0.00485	0.0204475
MAC_00538	mRNA splicing protein (Prp39)	149.228	7.3074	140.972	9.05726	131.116	4.23912	148.238	12.446	150.737	4.51106	140.02	5.95588	-0.0821072	0.5	0.682329	-0.186669	0.12855	0.274018	-0.00960515	0.9376	0.969351	0.0145204	0.90735	0.953525	-0.0918822	0.45275	0.642136	-0.104562	0.38925	0.583828	0.0725021	0.55335	0.72455	0.0966276	0.42685	0.618918	-0.00977498	0.9353	0.968156	0.177064	0.14665	0.301163	0.20119	0.09795	0.224488	0.094787	0.4426	0.63284
MAC_00539	Dynamin, putative	2.0239	0.0822767	2.27966	0.395826	2.20806	0.15598	2.35721	0.393473	2.67858	0.594719	2.14153	0.317215	0.171676	0.47215	0.659193	0.125638	0.5989	0.758524	0.219938	0.36185	0.556653	0.404329	0.08535	0.202839	0.0815027	0.7377	0.854052	-0.0460379	0.8416	0.916286	0.0482618	0.8399	0.915196	0.232653	0.3025	0.495646	-0.0901733	0.70415	0.832474	0.0942996	0.68775	0.821657	0.278691	0.22605	0.408371	-0.0441354	0.849	0.920879
MAC_00540	Uncharacterized protein	7.38159	1.67295	7.508	0.7645	6.20513	0.404762	9.31733	1.75965	7.37293	2.56717	7.90112	2.13792	0.0244977	0.91705	0.958683	-0.250469	0.3755	0.570389	0.335985	0.2048	0.381531	-0.00169299	0.97035	0.985026	0.0981249	0.71615	0.840504	-0.274967	0.32675	0.521716	0.311487	0.2354	0.419634	-0.0261906	0.90925	0.954538	0.0736273	0.78835	0.885105	0.586454	0.0345	0.101375	0.248776	0.3827	0.577351	0.348594	0.2186	0.399342
MAC_00541	Uncharacterized protein	9.14944	1.16634	11.3062	0.779278	10.2553	0.63509	9.75528	0.690448	11.4302	1.08185	13.3934	2.07896	0.305358	0.04465	0.123845	0.164611	0.28465	0.476122	0.0924993	0.5439	0.717111	0.321093	0.03225	0.0961719	0.549764	0.0004	0.00238366	-0.140747	0.34475	0.54032	-0.212859	0.1555	0.314097	0.0157351	0.91175	0.955937	0.244406	0.097	0.222951	-0.0721121	0.63555	0.785187	0.156482	0.2948	0.487264	0.385153	0.00845	0.0324881
MAC_00542	Peroxidase	718.246	61.7903	598.892	60.2164	495.965	51.1952	535.261	28.8297	611.195	41.3149	670.899	49.3191	-0.262183	0.06275	0.160988	-0.53424	0.00015	0.000993023	-0.424238	0.00305	0.0138366	-0.232846	0.0982	0.224941	-0.0983825	0.4849	0.669891	-0.272056	0.04495	0.124486	-0.162054	0.22895	0.41187	0.0293369	0.82805	0.908441	0.163801	0.23425	0.418357	0.110002	0.4065	0.600295	0.301393	0.0293	0.0892178	0.435857	0.0013	0.00666464
MAC_00543	Tripeptidyl-peptidase 1	40.8606	10.6274	17.5145	3.26691	47.4687	2.85861	142.358	57.2411	56.1263	7.52823	46.2305	5.28333	-1.22216	5e-05	0.000362775	0.216266	0.0858	0.203648	1.80074	5e-05	0.000362775	0.457968	0.00035	0.00212064	0.178136	0.15845	0.318361	1.43843	5e-05	0.000362775	3.0229	5e-05	0.000362775	1.68013	5e-05	0.000362775	1.4003	5e-05	0.000362775	1.58448	5e-05	0.000362775	0.241702	0.05015	0.135527	-0.0381297	0.7616	0.869092
MAC_00544	Uncharacterized protein	5.45918	0.590626	7.65005	0.623325	7.23927	0.346377	8.28557	1.62558	6.63425	1.88335	7.64279	2.03987	0.486784	0.03065	0.0923522	0.407161	0.07075	0.17606	0.601917	0.00655	0.026342	0.281249	0.21945	0.400307	0.485416	0.03085	0.092847	-0.0796238	0.70575	0.833455	0.115133	0.58025	0.744765	-0.205536	0.3463	0.541794	-0.00136846	0.9815	0.990125	0.194757	0.35555	0.550645	-0.125912	0.56825	0.735806	0.0782553	0.7152	0.839896
MAC_00545	NADH-dependent flavin oxidoreductase-like protein	101.462	13.4977	104.34	9.16127	75.6476	7.67218	61.2421	4.58983	47.4196	7.1439	57.2578	6.15462	0.0403556	0.741	0.856208	-0.42357	0.00085	0.00460684	-0.728341	5e-05	0.000362775	-1.09738	5e-05	0.000362775	-0.825392	5e-05	0.000362775	-0.463925	0.00025	0.00157207	-0.768696	5e-05	0.000362775	-1.13773	5e-05	0.000362775	-0.865747	5e-05	0.000362775	-0.304771	0.01365	0.0480738	-0.67381	5e-05	0.000362775	-0.401822	0.00165	0.008192
MAC_00546	Protein disulfide-isomerase	1241.38	77.095	1181.49	43.7519	919.017	52.8673	1010.73	76.5858	1443.5	74.5692	1197.76	81.6986	-0.0713385	0.70255	0.831325	-0.43378	0.01685	0.057093	-0.29655	0.10055	0.228929	0.217632	0.2662	0.455311	-0.0515996	0.78355	0.882375	-0.362442	0.04765	0.130239	-0.225211	0.21615	0.396274	0.28897	0.1419	0.294239	0.0197389	0.915	0.957489	0.13723	0.4284	0.620262	0.651412	0.00085	0.00460684	0.382181	0.0332	0.0983801
MAC_00547	Uncharacterized protein	109.781	5.19554	108.731	10.8232	105.282	1.95852	103.164	6.45339	99.2475	3.53447	94.4258	11.1428	-0.0138637	0.9189	0.959392	-0.0603593	0.646	0.792574	-0.0896881	0.48615	0.670874	-0.145519	0.2608	0.449404	-0.21737	0.0952	0.219931	-0.0464956	0.71915	0.842627	-0.0758244	0.55265	0.724075	-0.131655	0.3059	0.499205	-0.203506	0.1156	0.25342	-0.0293288	0.82185	0.905086	-0.0851597	0.5087	0.68913	-0.15701	0.2246	0.406626
MAC_00548	HIT zinc finger family protein	38.6844	1.94591	37.3034	3.98962	30.5471	1.81834	28.0154	1.20574	28.134	0.753908	29.3819	1.79033	-0.0524445	0.72415	0.845801	-0.340717	0.0275	0.0847698	-0.465529	0.0023	0.0108941	-0.459438	0.00305	0.0138366	-0.396826	0.01	0.0373265	-0.288273	0.05925	0.153964	-0.413085	0.0079	0.0307613	-0.406994	0.0096	0.0361107	-0.344382	0.02585	0.0806384	-0.124812	0.4219	0.614382	-0.118721	0.4481	0.637875	-0.0561091	0.72115	0.843969
MAC_00549	WD domain containing protein	8.76897	2.20096	10.5306	1.79346	9.94631	0.982733	7.46599	1.54287	8.16567	0.906321	10.7981	0.712707	0.264114	0.09345	0.216968	0.181754	0.24655	0.433015	-0.232074	0.16045	0.321383	-0.102836	0.51955	0.69785	0.300305	0.0563	0.148016	-0.0823592	0.5924	0.753698	-0.496188	0.0024	0.01129	-0.366949	0.02105	0.0683374	0.0361909	0.8121	0.899515	-0.413828	0.01045	0.0387066	-0.28459	0.0751	0.184145	0.11855	0.444	0.634113
MAC_00550	Exo-beta-1,3-glucanase	1635.33	42.5834	1212.18	15.049	1207.76	82.1246	1382.28	96.8914	1565.17	139.965	1543.92	126.811	-0.431974	0.04785	0.130662	-0.437245	0.04525	0.12515	-0.242533	0.27525	0.465568	-0.0632593	0.78945	0.88582	-0.0829862	0.7211	0.84395	-0.00527028	0.979	0.98899	0.189442	0.36015	0.555081	0.368715	0.09005	0.211035	0.348988	0.10485	0.236059	0.194712	0.347	0.54246	0.373985	0.0839	0.20025	0.354259	0.0976	0.223904
MAC_00551	Mitochondrial protein cyt-4	64.871	1.74668	64.3328	9.16631	61.3418	5.40443	77.3926	8.09267	70.8452	2.23972	76.683	7.74869	-0.0120176	0.92035	0.960196	-0.0807024	0.506	0.686976	0.254623	0.035	0.102554	0.127098	0.28875	0.480635	0.241333	0.0471	0.129047	-0.0686848	0.5703	0.737433	0.266641	0.02615	0.0813784	0.139116	0.2447	0.430842	0.253351	0.0351	0.102789	0.335326	0.00575	0.0236357	0.207801	0.08715	0.205933	0.322036	0.00805	0.0312329
MAC_00552	HEX2 protein-like protein	28.749	0.870093	44.2635	2.51116	38.0012	0.815152	32.6341	1.7011	34.4928	2.44711	34.9015	3.63376	0.622604	5e-05	0.000362775	0.402533	0.0023	0.0108941	0.182868	0.15625	0.315152	0.262781	0.0433	0.121043	0.279778	0.03135	0.0940402	-0.220071	0.0835	0.199552	-0.439736	0.0009	0.00484136	-0.359823	0.0055	0.0227569	-0.342826	0.00815	0.0315393	-0.219664	0.0868	0.205352	-0.139752	0.28525	0.476792	-0.122755	0.3443	0.53988
MAC_00553	tRNA (guanine(37)-N1)-methyltransferase	74.5697	5.04911	66.1683	6.31332	60.5075	9.91668	72.3266	7.03672	71.338	2.04494	78.6589	7.25075	-0.172448	0.16145	0.322846	-0.301475	0.0152	0.0525074	-0.0440627	0.72405	0.84574	-0.0639177	0.6062	0.763898	0.0770202	0.53175	0.707584	-0.129027	0.2992	0.492053	0.128385	0.29725	0.48994	0.10853	0.3823	0.576874	0.249468	0.04435	0.123233	0.257413	0.0409	0.115759	0.237558	0.05985	0.155157	0.378496	0.0025	0.011687
MAC_00554	DNA repair family protein	21.826	0.937633	23.3937	1.67418	20.9585	1.61714	16.3417	1.90625	13.1462	0.704097	10.1806	1.80835	0.100074	0.5148	0.694137	-0.0585102	0.7056	0.833357	-0.417488	0.0112	0.040976	-0.731398	5e-05	0.000362775	-1.10023	5e-05	0.000362775	-0.158584	0.3031	0.496295	-0.517562	0.00145	0.0073241	-0.831472	5e-05	0.000362775	-1.2003	5e-05	0.000362775	-0.358978	0.03035	0.0916725	-0.672888	5e-05	0.000362775	-1.04172	5e-05	0.000362775
MAC_00555	Uncharacterized protein	0.638461	0.217717	0.723752	0.22108	0.626456	0.412845	0.538327	0.348032	0.68453	0.299249	0.468738	0.228604	0.180896	1	1	-0.0273872	1	1	-0.246116	1	1	0.100514	1	1	-0.445817	1	1	-0.208283	1	1	-0.427012	1	1	-0.0803815	1	1	-0.626713	1	1	-0.218728	1	1	0.127902	1	1	-0.41843	1	1
MAC_00556	Uncharacterized protein	0.242608	0.153536	0.0555377	0.0961941	0.269683	0.347772	0.041953	0.0726647	0	0	0.10371	0.17963	-2.12709	1	1	0.152639	1	1	-2.53178	1	1	#NAME?	1	1	-1.22607	1	1	2.27972	1	1	-0.404694	1	1	#NAME?	1	1	0.901012	1	1	-2.68442	1	1	#NAME?	1	1	-1.37871	1	1
MAC_00557	Di-trans, poly-cis-decaprenylcistransferase	106.153	4.62873	104.239	14.0392	76.3407	9.61241	76.7313	8.40888	83.8521	9.0439	81.6703	7.14949	-0.0262492	0.83765	0.913961	-0.475626	0.00045	0.00264476	-0.468263	0.00025	0.00157207	-0.340232	0.0091	0.0345759	-0.378267	0.0036	0.0159129	-0.449377	0.00085	0.00460684	-0.442014	0.00085	0.00460684	-0.313983	0.014	0.0491091	-0.352018	0.00555	0.0229348	0.00736335	0.9542	0.977434	0.135394	0.30975	0.503389	0.0973593	0.4635	0.651539
MAC_00558	Exocyst complex component Sec10	56.9449	2.64367	53.5391	3.70347	43.7745	1.21513	44.6645	3.27775	47.7224	0.728785	44.714	0.638918	-0.0889728	0.45885	0.647519	-0.379475	0.00205	0.00987573	-0.350439	0.0044	0.0188498	-0.254898	0.03725	0.107724	-0.34884	0.00465	0.0197441	-0.290502	0.01695	0.0573834	-0.261466	0.03395	0.100154	-0.165926	0.1715	0.336736	-0.259868	0.03265	0.0971111	0.0290368	0.8178	0.902567	0.124577	0.3048	0.49805	0.0306348	0.79975	0.891861
MAC_00559	Dihydrouridine synthase	21.8866	2.2861	20.6564	2.4334	16.5578	1.22899	19.9856	1.56416	20.582	1.677	21.9319	2.75251	-0.0834545	0.5964	0.756675	-0.402534	0.01305	0.046341	-0.131083	0.40375	0.597723	-0.0886638	0.5774	0.742662	0.0029831	0.98645	0.992568	-0.319079	0.05285	0.141059	-0.047628	0.7609	0.868707	-0.00520924	0.97735	0.988125	0.0864376	0.57945	0.744137	0.271451	0.0945	0.21872	0.31387	0.0537	0.142819	0.405517	0.0126	0.0450038
MAC_00560	IBR domain-containing protein	5.97602	0.794789	6.79944	0.629265	6.40292	0.187784	5.99198	0.713614	6.39463	0.760399	5.18893	0.267589	0.186229	0.28575	0.477295	0.099545	0.5685	0.735985	0.00384722	0.98865	0.993528	0.0976742	0.57665	0.742188	-0.20375	0.2563	0.444072	-0.0866843	0.6138	0.769501	-0.182382	0.29775	0.490504	-0.0885551	0.60875	0.765785	-0.389979	0.0287	0.0877429	-0.0956978	0.5815	0.745747	-0.0018708	0.991	0.994629	-0.303295	0.0864	0.20467
MAC_00561	Fumarylacetoacetate hydrolase family protein	78.359	7.04102	74.0782	4.09005	60.1144	0.450435	53.1833	4.46928	56.1661	4.36678	58.5139	2.36927	-0.0810497	0.55275	0.72413	-0.382386	0.007	0.0278556	-0.559124	0.00025	0.00157207	-0.480398	0.00105	0.00553695	-0.421319	0.00315	0.0142182	-0.301337	0.0303	0.0915504	-0.478074	0.0009	0.00484136	-0.399348	0.0052	0.0216829	-0.340269	0.01725	0.0582027	-0.176737	0.2187	0.399454	-0.0980115	0.494	0.677454	-0.0389326	0.7808	0.880625
MAC_00562	Uncharacterized protein	15.1426	0.836604	20.8311	1.49743	17.7131	1.45821	15.8259	0.899325	16.9917	0.741169	18.1192	0.943415	0.460124	0.00085	0.00460684	0.226204	0.109	0.242958	0.06367	0.65135	0.796538	0.166214	0.24125	0.426694	0.258904	0.06445	0.164208	-0.23392	0.0843	0.200981	-0.396454	0.00305	0.0138366	-0.29391	0.03165	0.0947551	-0.20122	0.1367	0.286363	-0.162534	0.24665	0.433118	-0.0599896	0.6705	0.809802	0.0327002	0.8138	0.900564
MAC_00563	Uncharacterized protein	10.7158	2.16969	10.1894	4.73289	19.5475	1.55709	36.3986	1.87203	35.5056	0.717752	33.9752	1.62883	-0.0726621	0.71935	0.842742	0.867247	5e-05	0.000362775	1.76414	5e-05	0.000362775	1.72831	5e-05	0.000362775	1.66475	5e-05	0.000362775	0.939909	5e-05	0.000362775	1.83681	5e-05	0.000362775	1.80097	5e-05	0.000362775	1.73741	5e-05	0.000362775	0.896898	5e-05	0.000362775	0.861062	5e-05	0.000362775	0.797498	5e-05	0.000362775
MAC_00564	Molybdopterin synthase sulfur carrier subunit	99.301	4.42457	102.972	11.5913	94.6443	6.23186	112.351	12.0878	108.896	6.64477	124.453	11.9439	0.0523759	0.7585	0.867233	-0.0692922	0.6887	0.822231	0.178136	0.30095	0.493919	0.133073	0.4385	0.629241	0.325726	0.05645	0.148317	-0.121668	0.4875	0.671947	0.12576	0.4668	0.654499	0.0806966	0.642	0.789667	0.27335	0.10815	0.241587	0.247428	0.15315	0.310707	0.202365	0.24735	0.433881	0.395018	0.021	0.0682053
MAC_00565	Dynactin subunit, putative	53.6489	2.96355	57.2915	4.59147	49.0981	4.15734	49.8748	1.29379	52.1233	3.67955	53.1198	2.65909	0.0947729	0.4602	0.648659	-0.127882	0.32145	0.516094	-0.105237	0.42155	0.614016	-0.041619	0.7496	0.861457	-0.0142966	0.9108	0.955343	-0.222654	0.0834	0.199362	-0.200009	0.1245	0.267544	-0.136392	0.2896	0.481586	-0.109069	0.39425	0.588702	0.022645	0.8604	0.927455	0.0862626	0.5015	0.683424	0.113585	0.37345	0.568441
MAC_00566	Uncharacterized protein	26.7726	0.964462	33.6889	2.84641	38.9823	4.95154	39.9008	1.4233	40.6596	0.681318	36.1571	1.61639	0.331515	0.0134	0.0473448	0.542061	5e-05	0.000362775	0.575659	5e-05	0.000362775	0.602837	5e-05	0.000362775	0.43352	0.00155	0.00776179	0.210546	0.1063	0.238503	0.244145	0.0605	0.156519	0.271323	0.03545	0.103556	0.102006	0.43975	0.630337	0.0335987	0.79475	0.889106	0.0607767	0.63935	0.787747	-0.10854	0.40385	0.597815
MAC_00567	Putative maltase MLT2	22.0996	1.5423	25.4143	7.60063	42.4345	1.87433	39.6141	4.51256	33.1018	0.883761	40.1311	2.35293	0.201619	0.1483	0.303545	0.941217	5e-05	0.000362775	0.841992	5e-05	0.000362775	0.582888	5e-05	0.000362775	0.8607	5e-05	0.000362775	0.739598	5e-05	0.000362775	0.640373	5e-05	0.000362775	0.381269	0.00505	0.0211474	0.659081	5e-05	0.000362775	-0.0992247	0.43885	0.629605	-0.358329	0.0049	0.0206171	-0.080517	0.5261	0.703217
MAC_00568	Adenylate cyclase	17.6612	0.695039	16.467	1.82014	24.7953	1.35762	21.9844	1.28193	26.0542	0.298838	22.5733	2.0449	-0.101007	0.4119	0.60501	0.489485	5e-05	0.000362775	0.315895	0.01	0.0373265	0.560934	5e-05	0.000362775	0.354037	0.0043	0.018487	0.590492	5e-05	0.000362775	0.416902	0.00065	0.00364841	0.661942	5e-05	0.000362775	0.455044	0.0001	0.000686749	-0.17359	0.1534	0.311092	0.0714498	0.5527	0.72411	-0.135447	0.2602	0.44868
MAC_00569	Cystathionine beta-synthase, putative	121.451	8.80547	150.293	13.845	124.205	6.19516	82.2499	6.24965	54.2148	7.62111	69.8453	3.01486	0.307407	0.0174	0.0586071	0.0323577	0.8049	0.894909	-0.562283	5e-05	0.000362775	-1.16361	5e-05	0.000362775	-0.798134	5e-05	0.000362775	-0.27505	0.03035	0.0916725	-0.86969	5e-05	0.000362775	-1.47102	5e-05	0.000362775	-1.10554	5e-05	0.000362775	-0.594641	5e-05	0.000362775	-1.19597	5e-05	0.000362775	-0.830491	5e-05	0.000362775
MAC_00570	Mitochondrial phosphate carrier protein 2	543.239	21.8899	733.844	135.72	806.511	59.957	743.712	49.5096	331.355	7.18359	283.924	26.9103	0.433886	0.0019	0.00925559	0.570106	5e-05	0.000362775	0.453156	0.0014	0.00710529	-0.713213	5e-05	0.000362775	-0.936084	5e-05	0.000362775	0.13622	0.3578	0.552829	0.0192705	0.897	0.947835	-1.1471	5e-05	0.000362775	-1.36997	5e-05	0.000362775	-0.116949	0.4229	0.615406	-1.28332	5e-05	0.000362775	-1.50619	5e-05	0.000362775
MAC_00571	Ubiquitin carboxyl-terminal hydrolase 12	53.8453	1.19712	85.6579	15.2822	32.8795	5.36844	15.0542	0.639039	19.1628	2.0936	22.4854	1.44846	0.669765	5e-05	0.000362775	-0.711631	5e-05	0.000362775	-1.83865	5e-05	0.000362775	-1.49052	5e-05	0.000362775	-1.25983	5e-05	0.000362775	-1.3814	5e-05	0.000362775	-2.50842	5e-05	0.000362775	-2.16028	5e-05	0.000362775	-1.9296	5e-05	0.000362775	-1.12702	5e-05	0.000362775	-0.778885	5e-05	0.000362775	-0.548203	5e-05	0.000362775
MAC_00572	Mannosyltransferase	25.0461	2.20605	23.5696	2.0407	24.9322	2.01096	28.4638	2.06836	30.7823	1.07154	31.2743	2.46861	-0.0876603	0.5306	0.706817	-0.00657716	0.96365	0.981845	0.184544	0.18585	0.356293	0.297512	0.02925	0.0890808	0.320393	0.02095	0.0680838	0.0810832	0.56195	0.731156	0.272204	0.0519	0.139138	0.385173	0.00525	0.0218665	0.408053	0.0034	0.0151641	0.191121	0.16825	0.332331	0.30409	0.02615	0.0813784	0.32697	0.01855	0.061727
MAC_00573	Uncharacterized protein	143.253	32.7906	208.062	66.509	299.001	38.8076	186.418	12.1992	134.208	26.7147	131.565	18.9508	0.538447	5e-05	0.000362775	1.06159	5e-05	0.000362775	0.379979	0.0012	0.00621755	-0.0940886	0.44585	0.635785	-0.122791	0.3166	0.510706	0.523139	5e-05	0.000362775	-0.158468	0.20415	0.380702	-0.632536	5e-05	0.000362775	-0.661239	5e-05	0.000362775	-0.681608	5e-05	0.000362775	-1.15568	5e-05	0.000362775	-1.18438	5e-05	0.000362775
MAC_00574	Plasma membrane zinc ion transporter, putative	210.117	8.78269	193.427	9.83014	196.806	6.43621	202.15	13.7227	201.079	6.61409	200.447	6.88396	-0.119409	0.34455	0.540143	-0.0944184	0.45575	0.644782	-0.0557664	0.6642	0.805492	-0.0634354	0.6135	0.769288	-0.0679715	0.59275	0.753896	0.0249909	0.84065	0.915709	0.063643	0.6121	0.768299	0.055974	0.64925	0.794986	0.0514379	0.675	0.812815	0.0386521	0.76165	0.869101	0.030983	0.80335	0.893945	0.0264469	0.8308	0.910014
MAC_00575	Uncharacterized protein	90.6982	6.10929	102.752	14.9323	121.068	21.2486	92.8043	4.71694	71.1343	5.68634	81.0562	7.2088	0.180019	0.1461	0.300415	0.416666	0.0008	0.00436954	0.033117	0.78865	0.885266	-0.350529	0.005	0.020974	-0.162151	0.19215	0.364891	0.236646	0.05475	0.144961	-0.146902	0.2295	0.41252	-0.530548	5e-05	0.000362775	-0.342171	0.0062	0.0251556	-0.383549	0.00195	0.00946249	-0.767195	5e-05	0.000362775	-0.578817	5e-05	0.000362775
MAC_00576	Uncharacterized protein	12.4176	1.03889	16.5951	0.111614	15.7251	0.728494	19.33	2.57223	20.4869	0.685837	21.176	2.30414	0.418367	0.0116	0.0421261	0.340685	0.0396	0.112932	0.638457	0.00015	0.000993023	0.722314	5e-05	0.000362775	0.770041	5e-05	0.000362775	-0.0776823	0.6261	0.778132	0.22009	0.1605	0.321468	0.303947	0.04705	0.12895	0.351674	0.02225	0.0714318	0.297772	0.05705	0.149574	0.381629	0.01345	0.0474985	0.429356	0.0063	0.0255056
MAC_00577	Uncharacterized protein	47.3045	3.4649	38.9094	2.83318	47.5754	3.51257	53.442	1.10765	62.7889	5.04434	58.1432	6.02824	-0.281858	0.0252	0.0790527	0.00823836	0.94765	0.974253	0.175996	0.15565	0.314313	0.408534	0.0012	0.00621755	0.297633	0.0158	0.0542338	0.290097	0.0214	0.069228	0.457855	0.00045	0.00264476	0.690392	5e-05	0.000362775	0.579491	5e-05	0.000362775	0.167758	0.172	0.337435	0.400296	0.00125	0.00644361	0.289395	0.0184	0.0613148
MAC_00578	FRG1-like family protein	257.538	17.3703	250.693	11.4267	209.559	11.3659	193.339	13.3903	193.441	12.2523	200.955	22.6699	-0.038864	0.7483	0.86075	-0.297432	0.0152	0.0525074	-0.413655	0.0006	0.00340137	-0.412895	0.0004	0.00238366	-0.357912	0.0033	0.0147896	-0.258568	0.03125	0.093799	-0.374791	0.0018	0.00883347	-0.374031	0.00155	0.00776179	-0.319048	0.0073	0.0288364	-0.116223	0.33465	0.530119	-0.115464	0.34325	0.538933	-0.0604803	0.61865	0.772864
MAC_00579	Uncharacterized protein	111.422	2.82144	96.9979	8.42149	97.6166	8.46585	102.056	1.19768	109.6	3.54135	113.864	9.37526	-0.200008	0.1044	0.235335	-0.190834	0.1235	0.265964	-0.126667	0.30295	0.496154	-0.0237874	0.84745	0.919925	0.0312845	0.8023	0.893416	0.00917395	0.93975	0.970389	0.0733409	0.54455	0.717611	0.17622	0.1534	0.311092	0.231292	0.0615	0.158542	0.0641669	0.5992	0.758719	0.167046	0.1743	0.340589	0.222118	0.0718	0.178014
MAC_00580	Mitochondrial carrier protein, putative	106.329	1.71714	119.719	8.02145	141.108	14.3146	136.609	7.17515	99.763	7.81103	92.8976	5.36739	0.171112	0.156	0.31479	0.408263	0.0006	0.00340137	0.361515	0.00295	0.013463	-0.0919645	0.4482	0.637974	-0.194827	0.11095	0.246044	0.237152	0.0484	0.131814	0.190404	0.11615	0.254348	-0.263076	0.03115	0.0935665	-0.365939	0.0027	0.0124786	-0.0467479	0.6981	0.82832	-0.500228	5e-05	0.000362775	-0.603091	5e-05	0.000362775
MAC_00581	Ribosome biogenesis protein RLP24	367.49	1.65548	296.931	56.9795	265.523	39.5992	357.897	12.8497	351.437	15.7508	388.447	36.5401	-0.307577	0.01245	0.0445806	-0.46887	0.00015	0.000993023	-0.0381618	0.76205	0.869318	-0.0644368	0.59605	0.756431	0.0800128	0.5144	0.693823	-0.161294	0.19425	0.367706	0.269415	0.02865	0.087618	0.24314	0.04805	0.131079	0.387589	0.00175	0.00861936	0.430708	0.0004	0.00238366	0.404433	0.00095	0.00507718	0.548883	5e-05	0.000362775
MAC_00582	F-box domain containing protein	18.256	0.58076	20.3194	1.37474	21.8619	1.16198	19.7	2.96752	21.0955	1.24954	17.2672	0.228571	0.154489	0.289	0.480877	0.260052	0.0711	0.176733	0.109828	0.4522	0.6417	0.208566	0.14955	0.30535	-0.0803355	0.58235	0.746306	0.105563	0.46025	0.648692	-0.0446613	0.76065	0.868557	0.054077	0.7069	0.834204	-0.234825	0.10565	0.237387	-0.150224	0.2958	0.48832	-0.0514856	0.71565	0.840147	-0.340387	0.01905	0.0630469
MAC_00583	Uncharacterized protein	19.9539	2.76458	29.0926	5.07139	52.0749	1.82824	44.9631	3.20767	55.727	3.57059	54.4486	4.42472	0.543981	0.00015	0.000993023	1.38392	5e-05	0.000362775	1.17207	5e-05	0.000362775	1.48171	5e-05	0.000362775	1.44823	5e-05	0.000362775	0.839938	5e-05	0.000362775	0.628091	5e-05	0.000362775	0.937725	5e-05	0.000362775	0.904245	5e-05	0.000362775	-0.211847	0.0886	0.208528	0.0977873	0.4175	0.610253	0.0643069	0.59925	0.758744
MAC_00584	Uncharacterized protein	35.5777	11.9552	16.7841	4.05901	26.7553	4.23363	46.1883	9.17595	63.7131	6.87162	87.0963	16.0132	-1.08387	5e-05	0.000362775	-0.411148	0.00425	0.0183056	0.376555	0.0053	0.022046	0.840617	5e-05	0.000362775	1.29164	5e-05	0.000362775	0.672725	5e-05	0.000362775	1.46043	5e-05	0.000362775	1.92449	5e-05	0.000362775	2.37551	5e-05	0.000362775	0.787703	5e-05	0.000362775	1.25176	5e-05	0.000362775	1.70279	5e-05	0.000362775
MAC_00585	Uncharacterized protein	27.8369	1.768	26.6218	2.68667	26.9042	0.548788	28.7657	1.88307	27.2578	2.24928	34.4024	2.69893	-0.0643902	0.64935	0.795038	-0.0491631	0.72665	0.847274	0.0473505	0.73655	0.853419	-0.0303292	0.82605	0.907327	0.305514	0.03095	0.0930759	0.0152271	0.9152	0.957609	0.111741	0.43675	0.627729	0.0340609	0.8092	0.897701	0.369904	0.0089	0.0339351	0.0965136	0.4996	0.68203	0.0188338	0.8905	0.94427	0.354677	0.0115	0.0418227
MAC_00586	HET-s/LopB domain protein	37.5624	9.95814	18.7409	1.00959	28.0558	3.01099	37.1228	5.03252	46.0538	2.31692	61.8138	8.36585	-1.0031	5e-05	0.000362775	-0.420991	0.00145	0.0073241	-0.0169853	0.89945	0.949319	0.294029	0.0209	0.0679604	0.718637	5e-05	0.000362775	0.582112	5e-05	0.000362775	0.986119	5e-05	0.000362775	1.29713	5e-05	0.000362775	1.72174	5e-05	0.000362775	0.404006	0.0024	0.01129	0.715021	5e-05	0.000362775	1.13963	5e-05	0.000362775
MAC_00587	Alpha/beta fold family hydrolase, putative	0	0	0.0806909	0.139761	0.073225	0.126829	0	0	0.0601305	0.104149	0.220413	0.20785	inf	1	1	inf	1	1	0	1	1	inf	1	1	inf	1	1	-0.14007	1	1	#NAME?	1	1	-0.424308	1	1	1.44973	1	1	#NAME?	1	1	-0.284238	1	1	1.5898	1	1
MAC_00588	2-epi-5-epi-valiolone synthase	0	0	0.0356804	0.0618002	0.0375618	0.0650587	0	0	0	0	0	0	inf	1	1	inf	1	1	0	1	1	0	1	1	0	1	1	0.0741343	1	1	#NAME?	1	1	#NAME?	1	1	#NAME?	1	1	#NAME?	1	1	#NAME?	1	1	#NAME?	1	1
MAC_00589	NACHT and Ankyrin domain protein	0	0	0	0	0	0	0.00898325	0.0155594	0.00966625	0.0167424	0.0111306	0.0192787	0	1	1	0	1	1	inf	1	1	inf	1	1	inf	1	1	0	1	1	inf	1	1	inf	1	1	inf	1	1	inf	1	1	inf	1	1	inf	1	1
MAC_00590	Uncharacterized protein	0.204449	0.253007	0.0802006	0.138912	0.536005	0.193604	0.167317	0.183384	0.285299	0.26153	0.291401	0.14068	-1.35006	1	1	1.3905	1	1	-0.289162	1	1	0.480728	1	1	0.51126	1	1	2.74056	1	1	1.0609	1	1	1.83079	1	1	1.86132	1	1	-1.67966	1	1	-0.909774	1	1	-0.879243	1	1
MAC_00591	Very-long-chain (3R)-3-hydroxyacyl-CoA dehydratase	70.9469	2.61616	74.7203	4.63025	84.5716	6.30465	68.0561	5.68115	73.7859	6.06079	74.5237	7.42132	0.0747606	0.58805	0.750419	0.253435	0.06575	0.166705	-0.060014	0.66035	0.802811	0.0566051	0.67565	0.813236	0.0709595	0.60215	0.760867	0.178674	0.18805	0.359381	-0.134775	0.32915	0.524182	-0.0181555	0.89385	0.946041	-0.00380118	0.97755	0.988247	-0.313449	0.0227	0.0725993	-0.196829	0.1458	0.299937	-0.182475	0.17865	0.346639
MAC_00592	Uncharacterized protein	63.4505	2.96612	63.1652	6.75567	64.1258	3.98678	59.5828	3.04825	60.6625	4.08479	55.39	1.41391	-0.00650031	0.9591	0.979808	0.0152737	0.9054	0.952433	-0.0907346	0.47655	0.662823	-0.0648256	0.61775	0.772212	-0.196006	0.13075	0.277453	0.021774	0.86405	0.929385	-0.0842343	0.5067	0.687656	-0.0583253	0.65135	0.796538	-0.189505	0.14345	0.296436	-0.106008	0.4056	0.59945	-0.0800993	0.53415	0.709473	-0.211279	0.1027	0.232581
MAC_00593	SNF2-family ATP dependent chromatin remodeling factor snf21	87.6206	1.24363	90.9977	3.6548	91.0493	4.28114	95.3071	4.50741	97.2002	0.782585	92.6099	4.86083	0.0545607	0.6713	0.810286	0.0553778	0.6582	0.801316	0.121315	0.3403	0.535877	0.14969	0.2457	0.431961	0.0798963	0.52785	0.704678	0.000817077	0.99595	0.997232	0.066754	0.60475	0.76289	0.0951289	0.4588	0.647485	0.0253356	0.8421	0.916558	0.065937	0.6066	0.76417	0.0943118	0.4618	0.649994	0.0245185	0.84505	0.918492
MAC_00594	WD domain, G-beta repeat containing protein	52.7148	5.53193	48.8351	4.12783	50.0016	3.86175	53.8698	0.419688	52.0682	2.92783	52.4082	2.61126	-0.110291	0.36915	0.564111	-0.0762342	0.5405	0.714468	0.0312669	0.8013	0.892813	-0.0178074	0.888	0.942889	-0.00841737	0.94485	0.973063	0.0340572	0.78385	0.882553	0.141558	0.25055	0.437564	0.092484	0.46005	0.64855	0.101874	0.41055	0.603832	0.107501	0.38395	0.578535	0.0584268	0.63955	0.787892	0.0678168	0.58185	0.745949
MAC_00595	Cytochrome P450, putative	7.85137	4.0946	9.62803	1.61697	11.9471	1.39402	10.2298	0.867363	11.1129	3.34157	16.2928	17.447	0.294296	0.11185	0.24748	0.605648	0.0011	0.00576616	0.381762	0.03975	0.113264	0.501222	0.00785	0.0305982	1.05322	5e-05	0.000362775	0.311352	0.07165	0.177742	0.0874661	0.6213	0.774844	0.206926	0.236	0.420414	0.75892	5e-05	0.000362775	-0.223886	0.1917	0.364265	-0.104426	0.53135	0.707317	0.447568	0.01125	0.041119
MAC_00596	SWR1-complex protein 5	66.705	6.75586	66.0004	2.25875	60.0635	6.62078	52.4528	3.11121	55.9703	2.16385	59.486	3.27678	-0.0153192	0.9055	0.952473	-0.151307	0.2496	0.436456	-0.346776	0.0095	0.035793	-0.253134	0.0532	0.141799	-0.165244	0.20415	0.380702	-0.135988	0.30145	0.494531	-0.331457	0.0129	0.0459027	-0.237814	0.07005	0.174737	-0.149925	0.25335	0.440839	-0.195469	0.14425	0.29759	-0.101827	0.4395	0.630153	-0.0139371	0.9134	0.956756
MAC_00597	Uncharacterized protein	41.5857	4.23053	39.3384	4.57152	35.6463	5.96449	43.4117	5.46383	36.5464	0.403332	42.3944	2.84511	-0.0801502	0.5775	0.742722	-0.222337	0.1258	0.269583	0.0619945	0.66285	0.804522	-0.186357	0.1958	0.369791	0.0277862	0.84015	0.915356	-0.142187	0.3288	0.523846	0.142145	0.31815	0.512409	-0.106207	0.4655	0.653332	0.107936	0.4489	0.638619	0.284332	0.0491	0.133309	0.0359802	0.8046	0.894744	0.250123	0.0841	0.200604
MAC_00598	Transcription factor Fst12	205.839	8.74814	210.497	16.4591	238.703	12.8826	223.96	16.3875	250.83	1.24692	249.087	11.14	0.0322844	0.80625	0.895818	0.213704	0.0993	0.226905	0.121727	0.35245	0.547869	0.285197	0.02995	0.0907241	0.275133	0.0367	0.106425	0.181419	0.16175	0.323253	0.0894426	0.4911	0.674972	0.252913	0.0553	0.14602	0.242848	0.0652	0.165668	-0.0919768	0.4893	0.673436	0.0714931	0.59625	0.756577	0.061429	0.6426	0.790147
MAC_00599	Coronin	148.551	3.08603	126.341	5.26482	131.821	4.24002	131.263	4.09192	125.432	6.68498	126.7	6.98236	-0.233637	0.05635	0.14812	-0.172374	0.15775	0.317328	-0.178503	0.14685	0.301474	-0.244059	0.0462	0.127217	-0.229539	0.06305	0.161574	0.0612627	0.61595	0.770985	0.055134	0.65165	0.796756	-0.0104224	0.93015	0.965362	0.00409816	0.9715	0.98559	-0.00612875	0.9613	0.98088	-0.0716851	0.5528	0.724157	-0.0571645	0.6379	0.786856
MAC_00600	Uncharacterized protein	102.906	4.56634	119.769	23.7942	167.323	9.43853	144.227	4.14515	109.433	9.79884	123.874	7.83841	0.218922	0.0968	0.222668	0.701304	5e-05	0.000362775	0.487009	0.0003	0.00184856	0.0887122	0.4944	0.677756	0.267536	0.04175	0.11769	0.482383	0.0007	0.00389376	0.268087	0.05215	0.139643	-0.130209	0.32925	0.524295	0.0486142	0.719	0.842562	-0.214296	0.1225	0.264332	-0.612592	5e-05	0.000362775	-0.433768	0.00175	0.00861936
MAC_00601	1-(5-phosphoribosyl)-5-[(5-phosphoribosylamino)methylideneamino] imidazole-4-carboxamide isomerase	47.8868	2.97843	52.1845	3.86625	52.0443	3.06059	40.6109	0.793563	37.2094	0.714635	41.2896	2.06864	0.123993	0.38085	0.575488	0.120111	0.3935	0.588076	-0.237761	0.10635	0.23859	-0.36396	0.0135	0.047644	-0.21385	0.14225	0.294774	-0.00388156	0.97455	0.986689	-0.361754	0.01355	0.0477906	-0.487953	0.0014	0.00710529	-0.337843	0.01895	0.0627794	-0.357872	0.01325	0.046904	-0.484071	0.00115	0.00599744	-0.333961	0.0191	0.0631771
MAC_00602	Putative tetracycline efflux protein (Otrb)	496.886	178.655	553.377	165.242	671.079	123.1	549.213	237.56	588.514	130.941	583.71	223.263	0.155347	0.32155	0.516188	0.433568	0.00635	0.0256696	0.144452	0.3645	0.559485	0.244163	0.1211	0.26197	0.232336	0.14705	0.301746	0.278221	0.0783	0.190119	-0.0108951	0.9477	0.974281	0.0888161	0.5738	0.74009	0.0769893	0.63125	0.782103	-0.289116	0.07635	0.186505	-0.189404	0.23305	0.416944	-0.201231	0.2137	0.393138
MAC_00603	Cysteine synthase K/M:Cysteine synthase B	618.81	419.747	480.309	331.484	628.745	332.054	698.843	499.196	753.237	363.076	662.633	394.613	-0.365535	0.05005	0.135316	0.0229789	0.90325	0.951321	0.175472	0.38315	0.577834	0.283606	0.1393	0.290348	0.0987135	0.6071	0.764575	0.388514	0.0325	0.0967621	0.541006	0.00535	0.022219	0.649141	0.0005	0.0029	0.464248	0.0121	0.0435681	0.152493	0.4315	0.622996	0.260627	0.1601	0.320883	0.0757346	0.68295	0.818342
MAC_00604	Thiamine biosynthetic bifunctional enzyme, putative	16.0423	1.91016	21.0501	1.6569	22.9777	4.09647	21.6341	2.34715	20.4579	3.66309	21.7637	1.57383	0.391948	0.0099	0.0370232	0.518355	0.0006	0.00340137	0.43143	0.0049	0.0206171	0.350777	0.0222	0.0712933	0.440044	0.0037	0.0162849	0.126407	0.37975	0.574405	0.0394814	0.7821	0.881396	-0.0411709	0.77625	0.87776	0.0480957	0.7334	0.851419	-0.0869254	0.54385	0.717075	-0.167578	0.2444	0.430454	-0.078311	0.5812	0.745577
MAC_00605	tRNA processing endoribonuclease Trz1, putative	33.5601	2.76258	60.175	14.1944	39.5895	1.37596	22.8286	0.648791	28.1792	2.1114	25.1057	1.72509	0.842418	5e-05	0.000362775	0.238371	0.0675	0.16994	-0.555903	0.00025	0.00157207	-0.252117	0.05785	0.15121	-0.418734	0.0017	0.00840203	-0.604047	5e-05	0.000362775	-1.39832	5e-05	0.000362775	-1.09453	5e-05	0.000362775	-1.26115	5e-05	0.000362775	-0.794274	5e-05	0.000362775	-0.490488	0.00025	0.00157207	-0.657105	5e-05	0.000362775
MAC_00606	5-aminolevulinate synthase	184.555	10.7841	142.241	30.0547	86.9923	6.84495	111.432	3.68348	109.363	6.50008	112.007	4.20004	-0.375709	0.00345	0.0153442	-1.08509	5e-05	0.000362775	-0.727888	5e-05	0.000362775	-0.754933	5e-05	0.000362775	-0.720466	5e-05	0.000362775	-0.709382	5e-05	0.000362775	-0.352178	0.0045	0.0192068	-0.379224	0.00255	0.0118851	-0.344757	0.0058	0.0237988	0.357204	0.00265	0.0122799	0.330159	0.00555	0.0229348	0.364626	0.0024	0.01129
MAC_00607	SNF2 family helicase/ATPase	27.0467	1.50314	24.8114	1.48015	26.5486	1.62559	27.8543	2.31923	32.2743	0.66826	30.7392	1.68441	-0.124449	0.30755	0.500985	-0.0268139	0.82545	0.90694	0.0424511	0.7289	0.848498	0.254935	0.03595	0.104706	0.184631	0.1289	0.274553	0.0976353	0.4251	0.617215	0.1669	0.1722	0.3377	0.379384	0.00205	0.00987573	0.30908	0.01115	0.0408255	0.0692651	0.5696	0.736872	0.281749	0.02025	0.0662362	0.211445	0.0795	0.192349
MAC_00608	Glutathione synthetase	41.7975	2.68824	40.4444	0.838819	42.9171	1.36026	40.8256	0.983841	42.4473	0.37265	38.3603	3.61649	-0.0474777	0.7169	0.841091	0.0381352	0.7676	0.872626	-0.0339442	0.7941	0.88865	0.0222561	0.8635	0.929099	-0.123804	0.33815	0.533653	0.0856128	0.51435	0.693786	0.0135335	0.91735	0.958775	0.0697337	0.59265	0.753831	-0.0763266	0.5581	0.728195	-0.0720794	0.57525	0.741115	-0.0158791	0.9011	0.950255	-0.161939	0.2129	0.392124
MAC_00609	SsDNA binding protein	419.386	19.9656	395.942	14.5321	355.357	3.02019	379.971	10.1085	350.396	6.93323	364.089	51.3599	-0.0829902	0.5026	0.684376	-0.239008	0.05405	0.143569	-0.142389	0.24515	0.431336	-0.259292	0.03545	0.103556	-0.203988	0.0978	0.224252	-0.156018	0.20685	0.384234	-0.0593991	0.6262	0.778233	-0.176301	0.1477	0.302655	-0.120997	0.3216	0.516228	0.0966188	0.431	0.622578	-0.0202836	0.86785	0.93154	0.0350204	0.77995	0.879985
MAC_00610	Pheromone receptor	0.0866717	0.15012	0.151842	0.107015	0.108291	0.0493413	0.0416635	0.072163	0.0957542	0.165851	0.0306429	0.053075	0.808935	1	1	0.321278	1	1	-1.05678	1	1	0.143775	1	1	-1.50001	1	1	-0.487657	1	1	-1.86571	1	1	-0.66516	1	1	-2.30894	1	1	-1.37806	1	1	-0.177503	1	1	-1.82129	1	1
MAC_00611	Uncharacterized protein	112.587	4.81195	116.384	7.87687	102.9	2.49482	69.2663	9.05412	73.1435	3.41524	88.9526	5.8879	0.0478508	0.7103	0.836534	-0.12979	0.3101	0.503747	-0.700811	5e-05	0.000362775	-0.622234	5e-05	0.000362775	-0.339927	0.0072	0.0285084	-0.177641	0.1648	0.327455	-0.748662	5e-05	0.000362775	-0.670085	5e-05	0.000362775	-0.387778	0.0018	0.00883347	-0.571022	5e-05	0.000362775	-0.492444	0.0001	0.000686749	-0.210137	0.095	0.2196
MAC_00612	Uncharacterized protein	8.1001	1.1159	13.7623	2.96288	18.0285	1.72716	12.3439	1.88317	13.1884	1.82969	11.8205	0.964586	0.764707	5e-05	0.000362775	1.15427	5e-05	0.000362775	0.607784	0.0007	0.00389376	0.70326	5e-05	0.000362775	0.545283	0.0025	0.011687	0.389561	0.01145	0.0416909	-0.156923	0.32135	0.515967	-0.0614464	0.6979	0.828304	-0.219424	0.17395	0.34006	-0.546484	0.00045	0.00264476	-0.451007	0.00365	0.0161019	-0.608984	0.00015	0.000993023
MAC_00613	Uncharacterized protein	67.291	2.02074	61.4674	2.36308	57.5259	0.63019	48.0349	3.32438	55.5984	1.70126	54.4666	4.0687	-0.130591	0.28775	0.479496	-0.226201	0.0655	0.166244	-0.486329	0.0001	0.000686749	-0.27537	0.02525	0.0791756	-0.305042	0.01345	0.0474985	-0.09561	0.44035	0.630812	-0.355737	0.0038	0.016652	-0.144779	0.23825	0.423005	-0.17445	0.1533	0.310925	-0.260127	0.0357	0.104125	-0.0491686	0.68875	0.822259	-0.0788404	0.52195	0.699812
MAC_00614	Sodium bile acid transporter family protein, putative	2.29825	1.20257	3.19985	1.71191	2.70722	0.678086	2.6486	2.30941	4.07872	1.58588	4.83662	1.75685	0.47747	0.4815	0.667046	0.236275	0.7422	0.857005	0.204696	0.76915	0.87347	0.82758	0.17805	0.345826	1.07346	0.0918	0.214047	-0.241195	0.7011	0.830391	-0.272774	0.66685	0.807337	0.35011	0.5074	0.688103	0.595994	0.24735	0.433881	-0.031579	0.9373	0.96921	0.591306	0.2892	0.4811	0.837189	0.1469	0.301552
MAC_00615	Proteasome endopeptidase complex	467.182	11.3061	433.208	20.432	431.052	20.2086	431.71	9.91818	428.738	14.0869	418.221	8.83369	-0.108922	0.3776	0.57244	-0.11612	0.3484	0.543794	-0.113922	0.35665	0.551716	-0.123886	0.31605	0.51007	-0.159719	0.19425	0.367706	-0.0071977	0.951	0.975779	-0.00499986	0.9685	0.984047	-0.0149637	0.90165	0.950529	-0.0507964	0.68075	0.816823	0.00219785	0.986	0.992388	-0.00776595	0.9494	0.975013	-0.0435987	0.72665	0.847274
MAC_00616	Zinc finger protein	173.715	17.8907	169.746	17.4213	176.224	8.66141	177.665	29.9823	171.817	12.81	183.652	10.0761	-0.0333407	0.83555	0.912773	0.0206899	0.89745	0.948117	0.0324398	0.83835	0.914388	-0.0158484	0.9188	0.95936	0.0802507	0.6236	0.776335	0.0540306	0.7407	0.856028	0.0657806	0.6845	0.819394	0.0174923	0.91485	0.957461	0.113591	0.491	0.674902	0.0117499	0.93875	0.969883	-0.0365383	0.8228	0.905594	0.0595607	0.71725	0.841319
MAC_00617	DNA repair helicase RAD25	34.3059	1.21059	40.0441	3.6979	34.3567	0.528551	38.5523	1.17207	38.632	1.30813	34.679	1.13695	0.223133	0.0728	0.179881	0.00213374	0.9867	0.992659	0.168359	0.17235	0.337914	0.171338	0.1706	0.335593	0.015607	0.89745	0.948117	-0.220999	0.0763	0.186397	-0.0547735	0.6551	0.799223	-0.0517946	0.6777	0.814734	-0.207526	0.0965	0.222175	0.166225	0.178	0.345766	0.169204	0.175	0.341495	0.0134733	0.9149	0.957473
MAC_00618	Potassium transport protein	39.3776	1.62127	41.1639	1.39691	20.7425	0.314791	25.1262	0.850154	28.2099	0.743155	28.1718	2.12762	0.0640029	0.6056	0.763436	-0.924785	5e-05	0.000362775	-0.648185	5e-05	0.000362775	-0.481174	5e-05	0.000362775	-0.483125	0.0001	0.000686749	-0.988788	5e-05	0.000362775	-0.712188	5e-05	0.000362775	-0.545177	5e-05	0.000362775	-0.547128	5e-05	0.000362775	0.2766	0.0299	0.0906256	0.443611	0.00065	0.00364841	0.44166	0.00075	0.00413583
MAC_00619	VPS9 domain protein	39.6276	2.29559	26.9988	2.19785	19.9476	1.84352	18.0614	0.739139	16.2434	1.32037	14.7726	1.04223	-0.553612	0.0001	0.000686749	-0.990291	5e-05	0.000362775	-1.1336	5e-05	0.000362775	-1.28665	5e-05	0.000362775	-1.42358	5e-05	0.000362775	-0.436679	0.00085	0.00460684	-0.579984	5e-05	0.000362775	-0.73304	5e-05	0.000362775	-0.869973	5e-05	0.000362775	-0.143305	0.29435	0.486804	-0.296361	0.033	0.0979367	-0.433294	0.0017	0.00840203
MAC_00620	AMP-binding domain protein	42.6303	2.48848	33.294	2.91442	43.971	6.87976	48.1999	4.32164	42.8858	2.86357	48.9323	2.67864	-0.356619	0.00585	0.0239684	0.0446722	0.7206	0.843611	0.177149	0.16005	0.320804	0.00862152	0.9471	0.974042	0.198906	0.1128	0.249037	0.401291	0.002	0.00967343	0.533768	5e-05	0.000362775	0.365241	0.00535	0.022219	0.555525	5e-05	0.000362775	0.132477	0.2922	0.484356	-0.0360507	0.7753	0.877172	0.154234	0.21805	0.398641
MAC_00621	Aldo-keto reductase, putative	67.7485	4.26726	74.2042	8.53072	64.664	6.95348	44.3806	2.47346	35.1274	2.92265	32.0671	4.23088	0.131312	0.31975	0.514194	-0.067226	0.6151	0.770432	-0.610261	5e-05	0.000362775	-0.947594	5e-05	0.000362775	-1.0791	5e-05	0.000362775	-0.198538	0.1354	0.284386	-0.741573	5e-05	0.000362775	-1.07891	5e-05	0.000362775	-1.21041	5e-05	0.000362775	-0.543034	5e-05	0.000362775	-0.880368	5e-05	0.000362775	-1.01187	5e-05	0.000362775
MAC_00622	Uncharacterized protein	578.562	53.9254	626.38	19.3101	531.058	22.6206	438.997	28.1606	371.752	24.0028	370.892	13.4168	0.114568	0.3448	0.540371	-0.123602	0.30615	0.499482	-0.398259	0.00085	0.00460684	-0.638128	5e-05	0.000362775	-0.641473	5e-05	0.000362775	-0.238171	0.0482	0.131393	-0.512827	5e-05	0.000362775	-0.752696	5e-05	0.000362775	-0.756041	5e-05	0.000362775	-0.274656	0.02335	0.0743361	-0.514526	5e-05	0.000362775	-0.51787	5e-05	0.000362775
MAC_00623	Beta-glucosidase	25.3435	2.90587	23.6914	1.23939	34.1507	2.02075	32.1501	2.34161	25.6798	0.83147	25.0919	2.26377	-0.0972511	0.4918	0.675584	0.4303	0.00175	0.00861936	0.343206	0.01395	0.0489586	0.019018	0.89225	0.945191	-0.0143968	0.91825	0.959107	0.527551	0.0002	0.00128619	0.440457	0.0018	0.00883347	0.116269	0.41385	0.606807	0.0828543	0.55775	0.727914	-0.0870936	0.5171	0.695986	-0.411282	0.0028	0.0128752	-0.444697	0.0012	0.00621755
MAC_00624	Uncharacterized protein	0.345825	0.0326026	0.380529	0.123214	0.406608	0.3911	0.386486	0.107197	0.658535	0.275862	0.786584	0.221486	0.137965	1	1	0.233595	1	1	0.160376	1	1	0.929219	1	1	1.18556	1	1	0.0956306	1	1	0.0224108	1	1	0.791254	1	1	1.04759	1	1	-0.0732198	1	1	0.695624	1	1	0.951963	1	1
MAC_00625	D-lactate dehydrogenase 2	149.692	14.8154	126.351	8.74641	118.587	12.6444	128.826	10.0102	128.502	7.42145	132.135	9.63879	-0.244559	0.04835	0.131698	-0.336055	0.00615	0.0249845	-0.216577	0.0753	0.184512	-0.220205	0.07335	0.18087	-0.179986	0.14225	0.294774	-0.0914963	0.45085	0.640449	0.0279814	0.8148	0.901006	0.0243539	0.8431	0.917141	0.0645726	0.59315	0.754235	0.119478	0.32295	0.517601	0.11585	0.344	0.539593	0.156069	0.1981	0.37289
MAC_00626	Alpha-actinin, sarcomeric (F-actin cross linking protein)	73.6525	4.49074	46.7026	2.60402	86.037	11.3141	100.24	8.02187	88.1638	5.0239	88.1439	1.68526	-0.657232	5e-05	0.000362775	0.224223	0.06195	0.159432	0.444651	0.0001	0.000686749	0.259452	0.03135	0.0940402	0.259127	0.03025	0.0914481	0.881455	5e-05	0.000362775	1.10188	5e-05	0.000362775	0.916684	5e-05	0.000362775	0.916359	5e-05	0.000362775	0.220427	0.0705	0.175617	0.0352285	0.7701	0.873999	0.0349034	0.77065	0.874368
MAC_00627	Ribosomal protein, putative	441.336	2.54087	364.568	7.77581	346.685	9.65643	398.561	22.0487	424.062	17.4993	421.941	8.04365	-0.275689	0.02165	0.0698842	-0.348252	0.0041	0.0177504	-0.147078	0.2244	0.40637	-0.0576009	0.63305	0.783405	-0.0648362	0.58755	0.750104	-0.0725636	0.5421	0.715701	0.12861	0.28255	0.473749	0.218088	0.0695	0.173724	0.210852	0.07755	0.188754	0.201174	0.09675	0.222582	0.290651	0.0172	0.0580513	0.283416	0.0195	0.0642304
MAC_00628	Uncharacterized protein	246.167	9.79973	198.77	14.39	197.814	22.0376	247.507	21.2144	259.13	11.0325	255.214	10.6234	-0.308536	0.0125	0.0447236	-0.315492	0.00965	0.0362615	0.00783516	0.95045	0.975544	0.0740383	0.5443	0.717464	0.0520724	0.67065	0.809865	-0.00695652	0.9523	0.976372	0.316371	0.0103	0.0382592	0.382574	0.0019	0.00925559	0.360608	0.0034	0.0151641	0.323328	0.00885	0.0337869	0.389531	0.00135	0.00688777	0.367565	0.00305	0.0138366
MAC_00629	Cysteine synthase	131.662	4.70393	145.085	10.0986	128.247	5.21753	117.607	8.64271	97.2315	9.93198	89.7405	2.92761	0.140064	0.2441	0.430188	-0.0379138	0.7542	0.864596	-0.162867	0.17925	0.347419	-0.43734	0.0002	0.00128619	-0.553005	5e-05	0.000362775	-0.177978	0.14075	0.292527	-0.302931	0.01165	0.0422559	-0.577404	5e-05	0.000362775	-0.693069	5e-05	0.000362775	-0.124953	0.3065	0.499778	-0.399426	0.00125	0.00644361	-0.515091	5e-05	0.000362775
MAC_00630	Uncharacterized protein	32.3981	1.94184	40.6674	2.27011	40.7098	0.484292	34.3834	1.2532	36.4467	0.46003	34.9394	0.633582	0.327963	0.00755	0.0296461	0.329464	0.0072	0.0285084	0.0858016	0.48565	0.670518	0.169878	0.1655	0.328427	0.108944	0.37455	0.569523	0.00150081	0.992	0.995175	-0.242161	0.0486	0.132229	-0.158085	0.2031	0.379437	-0.219019	0.0744	0.182811	-0.243662	0.0488	0.132651	-0.159585	0.1942	0.367662	-0.220519	0.07245	0.179258
MAC_00631	Enoyl-CoA hydratase	378.422	9.94102	356.863	19.9216	357.561	23.6575	342.053	14.1917	253.04	15.156	318.149	10.7763	-0.084622	0.4888	0.672986	-0.0818066	0.50365	0.685191	-0.145776	0.2327	0.416515	-0.580631	5e-05	0.000362775	-0.250292	0.04005	0.113918	0.00281535	0.9805	0.989678	-0.0611543	0.61615	0.771057	-0.496009	5e-05	0.000362775	-0.16567	0.1745	0.340824	-0.0639697	0.59255	0.753773	-0.498824	5e-05	0.000362775	-0.168485	0.16475	0.327387
MAC_00632	Pyridine nucleotide-disulfide oxidoreductase, putative	15.3438	0.474184	20.2315	3.74687	12.3875	0.316898	10.5588	1.31104	9.63675	1.84352	8.18127	1.09491	0.398953	0.00905	0.0344185	-0.308767	0.05205	0.139444	-0.539209	0.00075	0.00413583	-0.671033	0.0002	0.00128619	-0.907255	5e-05	0.000362775	-0.707721	5e-05	0.000362775	-0.938162	5e-05	0.000362775	-1.06999	5e-05	0.000362775	-1.30621	5e-05	0.000362775	-0.230441	0.1701	0.334901	-0.362265	0.03505	0.102676	-0.598488	0.0009	0.00484136
MAC_00633	U3 small nucleolar RNA-associated protein	43.5118	1.35298	31.4711	8.34284	29.5693	7.95737	56.3324	9.37291	52.8328	3.39345	52.9971	5.44221	-0.467379	5e-05	0.000362775	-0.557304	5e-05	0.000362775	0.372558	0.00305	0.0138366	0.280028	0.02635	0.0818821	0.284507	0.0236	0.0749805	-0.0899249	0.45885	0.647519	0.839937	5e-05	0.000362775	0.747407	5e-05	0.000362775	0.751886	5e-05	0.000362775	0.929862	5e-05	0.000362775	0.837332	5e-05	0.000362775	0.841811	5e-05	0.000362775
MAC_00634	GDSL Lipase/Acylhydrolase family protein	27.7214	1.92368	26.15	5.52492	27.9406	3.43235	24.3042	1.40186	23.6734	3.49589	21.6986	2.09817	-0.0841897	0.63395	0.784028	0.0113603	0.9478	0.974322	-0.189796	0.2816	0.472749	-0.227732	0.19755	0.372237	-0.353397	0.04835	0.131698	0.09555	0.58635	0.749187	-0.105606	0.54745	0.720029	-0.143542	0.4167	0.609556	-0.269207	0.13775	0.287908	-0.201156	0.2553	0.442956	-0.239092	0.17495	0.34143	-0.364757	0.0404	0.114669
MAC_00635	Ubiquitin carboxyl-terminal hydrolase 19	28.364	1.63764	27.1308	2.52396	31.0308	1.68777	33.1267	0.80627	30.8231	0.236602	32.7296	1.49391	-0.0641274	0.6245	0.777005	0.129641	0.31505	0.508951	0.223934	0.08485	0.201925	0.119955	0.3614	0.556284	0.206538	0.11045	0.245259	0.193768	0.1388	0.289543	0.288061	0.0271	0.0837734	0.184082	0.1619	0.323459	0.270665	0.03765	0.108598	0.0942932	0.46605	0.653853	-0.00968586	0.94025	0.970607	0.076897	0.55355	0.724728
MAC_00636	Isochorismatase domain-containing protein 2A	165.85	4.70842	195.678	20.7133	236.797	5.58978	165.053	28.3017	116.323	18.0367	125.366	7.58827	0.238606	0.05625	0.147913	0.513773	5e-05	0.000362775	-0.00694603	0.95615	0.978345	-0.511737	0.0001	0.000686749	-0.403728	0.00145	0.0073241	0.275167	0.0264	0.0820129	-0.245552	0.05045	0.136157	-0.750343	5e-05	0.000362775	-0.642334	5e-05	0.000362775	-0.520719	0.0001	0.000686749	-1.02551	5e-05	0.000362775	-0.917501	5e-05	0.000362775
MAC_00637	Midasin	6.89688	0.418842	4.08812	0.395271	4.34222	0.454716	6.07497	1.59711	6.67121	1.04031	6.26629	0.140446	-0.754505	5e-05	0.000362775	-0.667509	5e-05	0.000362775	-0.183065	0.1396	0.290788	-0.0479935	0.6998	0.829491	-0.138332	0.2665	0.455673	0.0869954	0.49725	0.68006	0.571439	5e-05	0.000362775	0.706511	5e-05	0.000362775	0.616173	5e-05	0.000362775	0.484444	0.00015	0.000993023	0.619516	5e-05	0.000362775	0.529177	5e-05	0.000362775
MAC_00638	54S ribosomal protein L12	195.998	8.44071	169.709	20.6985	141.469	21.0706	177.002	4.87869	175.959	19.5083	184.936	18.8637	-0.207775	0.0924	0.215124	-0.470353	0.00025	0.00157207	-0.147076	0.23855	0.423333	-0.1556	0.2091	0.387148	-0.0838153	0.4939	0.677369	-0.262578	0.0359	0.104588	0.0606983	0.6257	0.777899	0.0521746	0.67255	0.81104	0.123959	0.31355	0.507483	0.323277	0.01015	0.037807	0.314753	0.0114	0.0415477	0.386538	0.00215	0.0102874
MAC_00639	CTD kinase subunit gamma	86.7597	8.22473	73.939	6.6859	59.8786	7.39504	71.0757	4.11003	70.7777	10.0743	78.2699	5.04832	-0.230689	0.07885	0.191133	-0.534985	0.00015	0.000993023	-0.287669	0.0309	0.0929682	-0.29373	0.0278	0.0855061	-0.148567	0.25385	0.441376	-0.304296	0.02505	0.0786952	-0.0569798	0.66835	0.808288	-0.0630406	0.638	0.786917	0.082122	0.5353	0.710333	0.247316	0.0721	0.178609	0.241255	0.0785	0.190474	0.386418	0.0043	0.018487
MAC_00640	Pyrroline-5-carboxylate reductase	154.1	9.70139	140.71	4.17499	115.658	7.15043	115.943	7.10015	128.191	9.05051	121.386	4.00664	-0.131143	0.2871	0.478842	-0.414004	0.0007	0.00389376	-0.41045	0.00075	0.00413583	-0.265572	0.0291	0.088713	-0.344271	0.005	0.020974	-0.282861	0.0216	0.0697517	-0.279307	0.0233	0.074194	-0.13443	0.2733	0.463265	-0.213129	0.0834	0.199362	0.00355433	0.97775	0.988321	0.148431	0.2277	0.410375	0.0697324	0.56965	0.736906
MAC_00641	Histone acetyltransferase type B catalytic subunit	56.1264	2.85375	47.7159	5.01821	64.3333	7.41847	67.502	4.71111	62.0669	1.63845	58.4581	3.35579	-0.23421	0.06605	0.167271	0.196886	0.11305	0.249456	0.26625	0.0325	0.0967621	0.145143	0.23905	0.423942	0.0587221	0.6361	0.785555	0.431096	0.0006	0.00340137	0.50046	0.00015	0.000993023	0.379353	0.0027	0.0124786	0.292932	0.0212	0.0687114	0.0693643	0.57205	0.738652	-0.0517425	0.67115	0.810163	-0.138164	0.26235	0.451194
MAC_00642	Uncharacterized protein	60.6249	3.13674	51.2921	1.87171	35.7044	3.55191	32.6322	1.32991	28.2713	1.11843	29.2428	0.384377	-0.241173	0.05175	0.138844	-0.763809	5e-05	0.000362775	-0.893613	5e-05	0.000362775	-1.10057	5e-05	0.000362775	-1.05183	5e-05	0.000362775	-0.522636	5e-05	0.000362775	-0.65244	5e-05	0.000362775	-0.8594	5e-05	0.000362775	-0.810653	5e-05	0.000362775	-0.129804	0.3057	0.498983	-0.336764	0.00825	0.031849	-0.288017	0.0267	0.0827671
MAC_00643	Uncharacterized protein	34.8683	2.59061	23.3374	2.63364	23.9067	2.90712	34.023	4.22924	36.0022	3.66866	35.0817	1.84728	-0.579269	5e-05	0.000362775	-0.544501	0.00025	0.00157207	-0.0354034	0.79375	0.888466	0.0461717	0.73625	0.853191	0.00880555	0.9469	0.973949	0.0347683	0.81515	0.901105	0.543865	0.0002	0.00128619	0.625441	5e-05	0.000362775	0.588074	5e-05	0.000362775	0.509097	0.00045	0.00264476	0.590672	5e-05	0.000362775	0.553306	5e-05	0.000362775
MAC_00644	Putative S-adenosylmethionine/tRNA-ribosyltransferase-isomerase	15.1739	1.45541	11.2479	3.07599	9.32614	2.99703	10.6065	1.89203	11.0308	4.03288	12.2893	2.57527	-0.431938	0.0201	0.0658425	-0.702237	0.00045	0.00264476	-0.516646	0.0053	0.022046	-0.460056	0.0143	0.0499727	-0.304184	0.09435	0.218466	-0.270299	0.16775	0.331649	-0.0847079	0.65925	0.802006	-0.0281177	0.88255	0.939973	0.127754	0.4996	0.68203	0.185591	0.34335	0.539043	0.242181	0.21885	0.399599	0.398053	0.03925	0.112181
MAC_00645	Phytanoyl-CoA dioxygenase	0.518395	0.897884	1.27928	1.10812	1.23228	1.08073	1.94126	0.413367	4.01204	2.41798	0.594507	1.02972	1.30321	1	1	1.24921	1	1	1.90487	0.238	0.422754	2.95221	0.1267	0.271059	0.197643	1	1	-0.0539989	1	1	0.60166	0.3823	0.576874	1.649	0.28285	0.474048	-1.10557	1	1	0.655659	0.39635	0.590633	1.703	0.27835	0.469001	-1.05157	1	1
MAC_00646	Uncharacterized protein	4.8466	0.707592	5.98954	0.43342	5.1189	0.33184	8.40257	3.08303	4.47207	1.33323	9.78304	4.73634	0.305472	0.28095	0.472033	0.0788608	0.78975	0.886029	0.793857	0.0065	0.026179	-0.11603	0.70625	0.833749	1.01331	0.00075	0.00413583	-0.226611	0.4243	0.616564	0.488386	0.066	0.167182	-0.421502	0.154	0.311979	0.707838	0.00785	0.0305982	0.714997	0.01145	0.0416909	-0.194891	0.5253	0.702517	0.934448	0.00105	0.00553695
MAC_00647	p-loop NTPase	5.75848	0.714786	5.06014	1.79978	6.07701	1.06522	7.86556	0.749756	9.8168	0.351029	8.08404	0.9872	-0.186513	0.31355	0.507483	0.077673	0.66675	0.807271	0.449861	0.01165	0.0422559	0.769564	5e-05	0.000362775	0.489387	0.0058	0.0237988	0.264186	0.1544	0.312535	0.636374	0.0005	0.0029	0.956077	5e-05	0.000362775	0.6759	0.0002	0.00128619	0.372188	0.03675	0.10655	0.691891	0.0001	0.000686749	0.411714	0.02055	0.0670254
MAC_00648	Uncharacterized protein	341.898	22.7064	332.297	1.95357	318.415	6.11527	289.679	0.779699	281.821	30.9305	309.973	4.45378	-0.0410908	0.7392	0.855017	-0.10266	0.4066	0.600393	-0.239109	0.0551	0.14564	-0.278787	0.0273	0.0842765	-0.141423	0.2612	0.449887	-0.0615687	0.62165	0.775094	-0.198018	0.11265	0.248785	-0.237696	0.0573	0.150097	-0.100332	0.429	0.620806	-0.13645	0.28235	0.473529	-0.176127	0.1656	0.328557	-0.0387634	0.76385	0.870398
MAC_00649	Disulfide oxidoreductase, putative	9.98448	1.2522	12.5752	1.81137	15.1521	2.26601	17.0936	4.02566	14.6894	0.322478	13.2934	1.18309	0.332819	0.0713	0.177089	0.60176	0.0013	0.00666464	0.775697	5e-05	0.000362775	0.557021	0.0022	0.0104899	0.412948	0.0244	0.0770364	0.268941	0.12435	0.267291	0.442879	0.01125	0.041119	0.224202	0.1991	0.374217	0.0801294	0.64995	0.795475	0.173938	0.2987	0.491464	-0.0447384	0.7912	0.88696	-0.188811	0.27155	0.461341
MAC_00650	Eps15-like protein pan1p	126.319	5.44563	106.034	2.41109	109.062	2.59616	119.936	5.4232	118.993	1.2062	111.74	4.93514	-0.252552	0.0373	0.107828	-0.211922	0.08025	0.193734	-0.0748127	0.54115	0.71497	-0.0861977	0.4729	0.659892	-0.176924	0.14675	0.301304	0.0406296	0.73685	0.853497	0.177739	0.1473	0.302129	0.166354	0.1716	0.336863	0.075628	0.53655	0.711233	0.137109	0.26675	0.455963	0.125724	0.30725	0.500627	0.0349984	0.7789	0.879367
MAC_00651	Isopentenyl-diphosphate delta-isomerase	440.119	22.2538	296.932	14.26	337.943	27.6794	352.823	8.68453	362.304	14.2542	459.167	25.3955	-0.567765	5e-05	0.000362775	-0.381114	0.00195	0.00946249	-0.318949	0.0098	0.0367176	-0.280696	0.0219	0.0705228	0.0611254	0.62255	0.775641	0.18665	0.1221	0.263657	0.248816	0.0397	0.113155	0.287069	0.01715	0.0579234	0.62889	5e-05	0.000362775	0.0621653	0.6078	0.765031	0.100419	0.40695	0.600717	0.44224	0.0004	0.00238366
MAC_00652	Uncharacterized protein	0.886048	0.338896	0.858906	0.181651	0.994517	0.50559	1.54731	0.179988	0.987396	0.601242	1.5111	0.349623	-0.0448854	1	1	0.166611	1	1	0.804305	0.14775	0.302728	0.156244	1	1	0.770143	0.16385	0.32624	0.211496	1	1	0.84919	0.11775	0.256817	0.201129	1	1	0.815028	0.1353	0.28422	0.637694	0.2381	0.422854	-0.010367	1	1	0.603532	0.2691	0.458638
MAC_00653	Putative replication factor-a protein	106.774	0.591823	88.6418	2.95564	112.293	11.0393	128.998	4.48519	126.68	2.31597	112.212	0.661167	-0.268494	0.03505	0.102676	0.0727105	0.55855	0.728484	0.272799	0.02935	0.0893307	0.246637	0.04705	0.12895	0.0716674	0.56055	0.730083	0.341205	0.00735	0.0289962	0.541293	5e-05	0.000362775	0.515131	5e-05	0.000362775	0.340162	0.00655	0.026342	0.200088	0.1053	0.236815	0.173927	0.15695	0.316107	-0.00104301	0.99255	0.995398
MAC_00654	Lon protease homolog 2, peroxisomal	51.4515	1.44374	50.738	4.01058	59.3222	3.88734	46.9058	3.26144	42.3818	3.91995	44.5654	3.40884	-0.0201447	0.8676	0.931433	0.205358	0.08875	0.208763	-0.133448	0.2694	0.458936	-0.279767	0.0215	0.0694955	-0.20729	0.0854	0.202931	0.225503	0.0619	0.159333	-0.113303	0.34835	0.543744	-0.259622	0.03325	0.0984884	-0.187145	0.12285	0.264858	-0.338806	0.0051	0.0213209	-0.485125	0.0001	0.000686749	-0.412648	0.0008	0.00436954
MAC_00655	C6 zinc finger domain-containing protein	1.88949	0.442438	1.22513	0.37527	2.62654	0.268282	3.43635	0.36096	3.68655	0.359359	2.99258	0.809732	-0.625069	0.0308	0.0927301	0.475163	0.057	0.149468	0.862879	0.00055	0.00315471	0.964273	0.00015	0.000993023	0.663392	0.00935	0.0353423	1.10023	0.00035	0.00212064	1.48795	5e-05	0.000362775	1.58934	5e-05	0.000362775	1.28846	5e-05	0.000362775	0.387716	0.08295	0.1986	0.48911	0.02725	0.0841493	0.18823	0.4109	0.604083
MAC_00656	MutL-like protein	33.1891	3.88923	34.4166	8.24685	58.4091	4.02832	49.9885	0.467172	57.0546	2.24205	50.5988	1.86861	0.0523969	0.6839	0.818975	0.815484	5e-05	0.000362775	0.590888	5e-05	0.000362775	0.781634	5e-05	0.000362775	0.608394	5e-05	0.000362775	0.763087	5e-05	0.000362775	0.538491	5e-05	0.000362775	0.729237	5e-05	0.000362775	0.555997	5e-05	0.000362775	-0.224596	0.06445	0.164208	-0.0338503	0.78045	0.88031	-0.20709	0.09485	0.219326
MAC_00657	ARM-like repeat-containing protein	119.467	8.96389	90.1001	15.8698	87.1216	21.8339	114.335	13.9321	110.542	9.41281	122.399	13.6559	-0.407013	0.00095	0.00507718	-0.455511	0.00035	0.00212064	-0.0633471	0.6027	0.76133	-0.112012	0.36035	0.555259	0.0349776	0.77225	0.875242	-0.0484981	0.69545	0.826665	0.343666	0.0058	0.0237988	0.295001	0.0176	0.0591574	0.441991	0.0001	0.000686749	0.392164	0.0016	0.00797782	0.343499	0.00605	0.0246474	0.490489	5e-05	0.000362775
MAC_00658	Uncharacterized protein	26.162	1.48766	28.4287	2.05859	39.1584	2.31419	34.1453	1.58846	34.4546	2.32586	34.0254	3.14973	0.119874	0.35225	0.54766	0.581849	5e-05	0.000362775	0.384215	0.003	0.0136591	0.397224	0.00215	0.0102874	0.379137	0.0036	0.0159129	0.461975	0.0002	0.00128619	0.264341	0.0393	0.112274	0.27735	0.03285	0.0975683	0.259263	0.04535	0.125365	-0.197634	0.1138	0.250582	-0.184624	0.144	0.297197	-0.202711	0.10925	0.243328
MAC_00659	Uncharacterized protein	26.1478	4.33376	21.1786	3.434	30.0645	5.08958	31.3726	4.98947	32.8774	3.79437	28.0939	9.16492	-0.304084	0.24425	0.430312	0.201368	0.41785	0.61055	0.262817	0.28825	0.480027	0.330405	0.17775	0.345372	0.103567	0.68135	0.817172	0.505452	0.0481	0.131187	0.5669	0.02775	0.0853903	0.634488	0.01325	0.046904	0.40765	0.1154	0.253142	0.0614486	0.7947	0.889074	0.129037	0.5838	0.747325	-0.0978014	0.685	0.819788
MAC_00660	ABC transporter domain containing protein	38.7202	3.61893	40.2133	1.58366	40.7431	1.01135	39.2209	2.82379	40.7158	1.81168	40.7847	1.61681	0.0545863	0.6561	0.79984	0.0734714	0.549	0.72126	0.0185356	0.8823	0.939803	0.0725043	0.5607	0.730179	0.0749418	0.5392	0.713469	0.018885	0.87755	0.937062	-0.0360507	0.7743	0.876575	0.017918	0.8852	0.941386	0.0203555	0.86845	0.931839	-0.0549357	0.657	0.800443	-0.00096705	0.99205	0.995177	0.00147049	0.9924	0.995303
MAC_00661	Proteasome maturation factor	347.895	23.2913	334.542	24.2247	314.461	5.75205	323.965	9.05214	297.605	15.6406	291.748	5.17456	-0.0564643	0.6499	0.795453	-0.145767	0.2317	0.415382	-0.102813	0.4081	0.601801	-0.225251	0.06375	0.162928	-0.253928	0.0383	0.11011	-0.0893025	0.46525	0.653121	-0.0463488	0.70425	0.832513	-0.168787	0.16855	0.332797	-0.197463	0.11125	0.246542	0.0429536	0.72535	0.846464	-0.0794841	0.5175	0.696231	-0.108161	0.38325	0.577873
MAC_00662	Uncharacterized protein	168.236	3.69324	191.839	15.4618	144.502	5.8551	134.362	8.26966	125.54	3.08654	115.442	4.04564	0.189412	0.1258	0.269583	-0.219399	0.07415	0.182369	-0.324358	0.00935	0.0353423	-0.422335	0.00085	0.00460684	-0.543314	5e-05	0.000362775	-0.408811	0.00085	0.00460684	-0.51377	5e-05	0.000362775	-0.611747	5e-05	0.000362775	-0.732726	5e-05	0.000362775	-0.104959	0.38745	0.58197	-0.202936	0.09995	0.22798	-0.323915	0.0088	0.0336301
MAC_00663	AP complex subunit beta	94.8898	2.05355	84.0441	9.37482	79.9681	4.15692	90.5916	1.06743	90.6782	4.83632	87.1138	3.04037	-0.175108	0.1506	0.306884	-0.246829	0.0399	0.113597	-0.0668756	0.5771	0.742414	-0.0654978	0.58825	0.750551	-0.123353	0.3078	0.501267	-0.0717208	0.55655	0.726942	0.108232	0.37405	0.56902	0.10961	0.36795	0.56292	0.0517547	0.6778	0.814783	0.179953	0.13265	0.280357	0.181331	0.132	0.279438	0.123475	0.3052	0.498462
MAC_00664	ER membrane protein complex subunit 4	117.439	13.7292	117.37	8.12298	113.133	2.00494	109.186	3.38576	109.867	13.5309	110.614	7.77121	-0.000846044	0.99535	0.996856	-0.0538859	0.69485	0.826355	-0.105127	0.44235	0.632606	-0.0961544	0.48855	0.67279	-0.0863793	0.52935	0.705734	-0.0530399	0.6981	0.82832	-0.104281	0.4396	0.630209	-0.0953083	0.4869	0.67141	-0.0855332	0.53035	0.706613	-0.0512411	0.70695	0.834239	-0.0422685	0.7603	0.868349	-0.0324933	0.8129	0.900017
MAC_00665	Uncharacterized protein	11.8173	0.657338	11.7117	1.78422	14.4043	1.22966	15.7117	0.274293	14.2883	1.72846	15.0085	2.32496	-0.0129457	0.9296	0.964985	0.285594	0.065	0.165298	0.410934	0.00865	0.0331536	0.273933	0.07765	0.188957	0.344876	0.0259	0.080758	0.298539	0.05485	0.145146	0.42388	0.007	0.0278556	0.286879	0.0653	0.165854	0.357821	0.0213	0.0689727	0.125341	0.39505	0.58943	-0.0116605	0.93905	0.970004	0.0592821	0.68645	0.820734
MAC_00666	Syntaxin	86.8391	7.49753	72.4111	2.59367	62.0796	2.57065	73.3501	5.50897	76.4299	3.47196	69.8044	0.797848	-0.262135	0.03645	0.105888	-0.484227	5e-05	0.000362775	-0.243546	0.05285	0.141059	-0.184208	0.138	0.288324	-0.315026	0.01305	0.046341	-0.222092	0.0789	0.191228	0.018589	0.88205	0.939658	0.0779269	0.5351	0.710196	-0.0528917	0.67625	0.813698	0.240681	0.0569	0.149269	0.300019	0.01815	0.0606702	0.1692	0.185	0.355167
MAC_00667	Aspartate aminotransferase	522.323	43.0003	490.029	82.4212	306.132	33.0496	170.817	3.07237	185.187	7.39071	243.069	12.7792	-0.0920753	0.5052	0.686414	-0.770787	5e-05	0.000362775	-1.6125	5e-05	0.000362775	-1.49596	5e-05	0.000362775	-1.10357	5e-05	0.000362775	-0.678712	5e-05	0.000362775	-1.52042	5e-05	0.000362775	-1.40388	5e-05	0.000362775	-1.0115	5e-05	0.000362775	-0.841708	5e-05	0.000362775	-0.725173	5e-05	0.000362775	-0.332787	0.008	0.031069
MAC_00668	Uncharacterized protein	6.65758	1.15762	5.8681	0.17386	7.11659	1.39816	8.54738	2.20892	9.51874	2.00409	8.94295	2.50671	-0.182103	0.4122	0.605279	0.0961884	0.65825	0.801338	0.360485	0.09375	0.217457	0.515774	0.0158	0.0542338	0.425753	0.04675	0.128337	0.278291	0.21135	0.390106	0.542588	0.0148	0.051401	0.697876	0.00155	0.00776179	0.607856	0.00575	0.0236357	0.264297	0.21045	0.388866	0.419585	0.04385	0.122207	0.329565	0.1148	0.252217
MAC_00669	60S ribosomal export protein NMD3	123.72	13.6752	97.8565	20.9068	112.757	19.4915	143.567	20.9421	128.289	12.5444	150.733	21.2049	-0.33834	0.006	0.0244806	-0.133865	0.2724	0.462293	0.214649	0.07715	0.18802	0.0523232	0.66325	0.80478	0.284914	0.0188	0.0623987	0.204475	0.0941	0.218062	0.552989	5e-05	0.000362775	0.390663	0.0012	0.00621755	0.623254	5e-05	0.000362775	0.348514	0.00465	0.0197441	0.186188	0.12355	0.266026	0.418779	0.00055	0.00315471
MAC_00670	Pre-rRNA-processing protein ESF2	104.325	6.16693	94.5327	17.6882	109.666	8.49622	126.985	11.4158	122.301	6.61621	131.119	2.17889	-0.142203	0.25365	0.441164	0.072023	0.56205	0.731233	0.283574	0.0222	0.0712933	0.229345	0.065	0.165298	0.329783	0.00655	0.026342	0.214226	0.0863	0.204503	0.425776	0.00065	0.00364841	0.371548	0.0033	0.0147896	0.471986	0.0003	0.00184856	0.211551	0.0845	0.201315	0.157322	0.1985	0.373388	0.25776	0.03575	0.104236
MAC_00671	Betaine aldehyde dehydrogenase 2	87.6174	5.10125	89.6248	5.7847	126.166	5.9448	117.006	2.40924	95.0859	2.98959	96.8775	5.14684	0.0326818	0.7882	0.885016	0.526039	5e-05	0.000362775	0.417294	0.0006	0.00340137	0.118015	0.339	0.534553	0.144944	0.2422	0.427863	0.493357	5e-05	0.000362775	0.384612	0.0013	0.00666464	0.0853329	0.48435	0.669444	0.112262	0.36535	0.56032	-0.108745	0.37095	0.565958	-0.408024	0.0011	0.00576616	-0.381095	0.0017	0.00840203
MAC_00672	Uncharacterized protein	12.6594	3.49545	7.62314	0.828111	3.2945	0.368289	15.7788	4.0697	14.7486	5.12365	14.7904	0.8312	-0.731747	0.064	0.163423	-1.94207	0.01545	0.0532365	0.317781	0.334	0.529366	0.220378	0.51455	0.693943	0.224454	0.5038	0.685335	-1.21032	0.0742	0.182471	1.04953	0.00865	0.0331536	0.952125	0.01555	0.0535233	0.956201	0.01435	0.0500996	2.25985	0.007	0.0278556	2.16245	0.0094	0.0354979	2.16653	0.0094	0.0354979
MAC_00673	Phosphomevalonate kinase	135.884	3.3175	121.441	7.80032	126.583	4.81135	151.111	3.64004	131.828	5.98883	128.677	7.33531	-0.162125	0.1787	0.346699	-0.102299	0.4011	0.595153	0.153228	0.20445	0.381118	-0.0437244	0.7221	0.844469	-0.0786298	0.5166	0.695592	0.0598265	0.6261	0.778132	0.315353	0.0108	0.0397769	0.118401	0.32995	0.525074	0.0834954	0.49445	0.67778	0.255527	0.03445	0.101262	0.0585743	0.62535	0.777643	0.0236689	0.83995	0.915227
MAC_00674	Pentatricopeptide repeat protein	176.742	13.3641	92.3936	11.7665	75.285	4.02877	91.2793	7.31476	80.2477	3.48652	89.044	4.09467	-0.935784	5e-05	0.000362775	-1.23122	5e-05	0.000362775	-0.953289	5e-05	0.000362775	-1.13912	5e-05	0.000362775	-0.989058	5e-05	0.000362775	-0.295431	0.0175	0.0588897	-0.0175048	0.88295	0.94019	-0.203333	0.10725	0.240089	-0.0532739	0.6667	0.807226	0.277926	0.02615	0.0813784	0.0920977	0.4457	0.635666	0.242157	0.0537	0.142819
MAC_00675	Uncharacterized protein	0.736413	1.27551	0.227964	0.394846	0.450012	0.779446	0	0	0.825789	0.844259	0	0	-1.69171	1	1	-0.710551	1	1	#NAME?	1	1	0.165259	1	1	#NAME?	1	1	0.981154	1	1	#NAME?	1	1	1.85696	1	1	#NAME?	1	1	#NAME?	1	1	0.875811	1	1	#NAME?	1	1
MAC_00676	ATP-dependent RNA helicase DBP7, putative	27.0572	0.302897	24.2754	7.96962	25.3567	5.48703	44.905	5.20176	39.8771	4.83162	43.8667	6.1329	-0.156513	0.23485	0.418989	-0.093642	0.4715	0.658566	0.730866	5e-05	0.000362775	0.55955	5e-05	0.000362775	0.697116	5e-05	0.000362775	0.0628714	0.63305	0.783405	0.88738	5e-05	0.000362775	0.716063	5e-05	0.000362775	0.853629	5e-05	0.000362775	0.824508	5e-05	0.000362775	0.653192	5e-05	0.000362775	0.790758	5e-05	0.000362775
MAC_00677	Uncharacterized protein	78.0746	6.46344	55.0052	15.982	33.1683	7.05108	17.5106	9.99079	2.02524	1.75546	1.19853	1.05862	-0.505284	0.0063	0.0255056	-1.23505	5e-05	0.000362775	-2.15663	5e-05	0.000362775	-5.26869	0.00265	0.0122799	-6.02552	0.04575	0.126241	-0.729764	0.00075	0.00413583	-1.65134	5e-05	0.000362775	-4.76341	0.00265	0.0122799	-5.52024	0.04575	0.126241	-0.921578	0.0006	0.00340137	-4.03364	0.00265	0.0122799	-4.79047	0.04575	0.126241
MAC_00678	COPI-coated vesicle protein, putative	183.153	5.14594	158.564	10.7197	122.115	14.1835	154.181	6.50562	150.862	20.1843	147.685	7.89218	-0.207986	0.1498	0.30574	-0.584816	0.00015	0.000993023	-0.248424	0.0883	0.208042	-0.279825	0.05795	0.151411	-0.310527	0.0355	0.10367	-0.37683	0.01245	0.0445806	-0.0404373	0.7806	0.880431	-0.0718383	0.626	0.778062	-0.10254	0.48695	0.671449	0.336393	0.03055	0.0921111	0.304992	0.05015	0.135527	0.27429	0.07795	0.189498
MAC_00679	Elongation factor Tu GTP binding domain containing protein	30.7741	1.5453	28.9558	3.38265	31.9784	1.45611	37.6606	2.14658	38.4309	1.9518	33.9712	0.813652	-0.0878616	0.4861	0.670842	0.0553795	0.65775	0.800972	0.291338	0.01925	0.063587	0.320549	0.01025	0.0381042	0.142597	0.2522	0.43941	0.143241	0.25415	0.441651	0.3792	0.00195	0.00946249	0.408411	0.00085	0.00460684	0.230458	0.0644	0.164121	0.235959	0.0559	0.14717	0.26517	0.03275	0.0973317	0.0872171	0.4843	0.66939
MAC_00680	SUN domain protein (Adg3), putative	113.797	5.48815	95.7313	13.4487	205.152	7.8448	195.193	13.0705	208.409	12.4056	218.308	18.017	-0.249396	0.03665	0.10632	0.850231	5e-05	0.000362775	0.778444	5e-05	0.000362775	0.872957	5e-05	0.000362775	0.939907	5e-05	0.000362775	1.09963	5e-05	0.000362775	1.02784	5e-05	0.000362775	1.12235	5e-05	0.000362775	1.1893	5e-05	0.000362775	-0.071787	0.5601	0.729657	0.0227262	0.8545	0.923993	0.0896759	0.4711	0.658207
MAC_00681	PCI domain-containing protein	41.3568	4.50633	43.5623	2.24987	40.0847	3.33946	37.689	2.65689	41.0906	0.94991	41.4173	3.05064	0.0749575	0.55875	0.728615	-0.0450711	0.73115	0.849956	-0.133981	0.3035	0.496689	-0.00931534	0.94055	0.970732	0.002111	0.98755	0.992992	-0.120029	0.3537	0.548934	-0.208938	0.10515	0.236567	-0.0842729	0.52035	0.69854	-0.0728465	0.57555	0.741325	-0.0889098	0.49025	0.674251	0.0357558	0.7817	0.881129	0.0471821	0.71595	0.840373
MAC_00682	Acetyl-CoA acetyltransferase	424.548	62.6365	407.581	47.9687	348.716	50.8525	250.686	16.5062	224.037	12.3894	312.461	54.5541	-0.0588431	0.6635	0.804981	-0.283875	0.03095	0.0930759	-0.760049	5e-05	0.000362775	-0.922189	5e-05	0.000362775	-0.442252	0.001	0.00530838	-0.225032	0.08525	0.202652	-0.701206	5e-05	0.000362775	-0.863346	5e-05	0.000362775	-0.383409	0.0038	0.016652	-0.476174	0.0004	0.00238366	-0.638314	5e-05	0.000362775	-0.158377	0.22345	0.405227
MAC_00683	Ubiquitin-conjugating enzyme E2	42.3777	1.62805	38.6046	1.7201	26.1098	1.7332	29.4676	4.47942	32.2943	1.6033	28.1767	1.52431	-0.134534	0.3261	0.521012	-0.698714	5e-05	0.000362775	-0.524175	0.00035	0.00212064	-0.392028	0.0047	0.0199211	-0.588803	0.0001	0.000686749	-0.56418	5e-05	0.000362775	-0.389641	0.00705	0.0280143	-0.257494	0.06595	0.167076	-0.454269	0.00165	0.008192	0.174539	0.23265	0.416455	0.306686	0.03485	0.102196	0.109911	0.45285	0.642227
MAC_00684	Kinesin-like protein	98.4698	5.16429	85.6678	9.74136	80.9007	3.16455	88.7432	0.879731	99.4241	2.22442	98.4585	4.0043	-0.200929	0.1005	0.22884	-0.28353	0.01995	0.0654355	-0.150044	0.21475	0.394428	0.0139141	0.90915	0.954522	-0.000165536	0.999	0.99912	-0.0826006	0.50015	0.682406	0.0508848	0.67555	0.813171	0.214843	0.0793	0.192003	0.200764	0.1006	0.229018	0.133485	0.27565	0.466017	0.297444	0.01565	0.0538183	0.283364	0.02075	0.0675715
MAC_00685	Ubiquitin conjugating enzyme, putative	78.9558	10.0921	87.8115	8.21481	92.2405	3.15656	80.1517	3.95629	75.0942	4.19524	78.979	3.24701	0.153365	0.22365	0.405466	0.224355	0.0739	0.181902	0.0216865	0.8611	0.927728	-0.0723447	0.56075	0.73019	0.000422936	0.99685	0.997652	0.0709898	0.5736	0.739924	-0.131678	0.2921	0.484229	-0.225709	0.07135	0.177181	-0.152942	0.22635	0.408723	-0.202668	0.10355	0.233953	-0.296699	0.01735	0.0584751	-0.223932	0.0708	0.176142
MAC_00686	ToxA protein	16.396	0.975932	18.5103	1.84533	18.4507	2.11531	21.3374	0.423034	24.7557	2.37108	26.4687	5.47089	0.17498	0.3361	0.531449	0.17033	0.34865	0.544096	0.380039	0.0321	0.0958164	0.594414	0.00085	0.00460684	0.690941	0.00015	0.000993023	-0.00465088	0.9864	0.992542	0.205058	0.24605	0.432393	0.419433	0.01655	0.0562911	0.515961	0.0025	0.011687	0.209709	0.22895	0.41187	0.424084	0.01505	0.052102	0.520612	0.00245	0.0114878
MAC_00687	SAGA-like transcriptional regulatory complex subunit Spt3	92.8623	2.85904	98.1069	4.77666	88.5772	1.98279	85.0133	6.97355	85.0515	1.10759	91.1067	1.65293	0.0792627	0.5274	0.704251	-0.0681564	0.59205	0.753437	-0.127404	0.3177	0.511963	-0.126756	0.31705	0.511233	-0.0275347	0.82755	0.908197	-0.147419	0.23975	0.42479	-0.206667	0.10225	0.231837	-0.206018	0.1019	0.231275	-0.106797	0.39515	0.589508	-0.0592475	0.6453	0.792098	-0.0585992	0.64405	0.791242	0.0406217	0.74785	0.860556
MAC_00688	Uncharacterized protein	8.37008	0.321408	11.8155	1.34091	12.4074	0.537753	15.4853	1.65662	12.3362	1.14115	12.5954	0.328726	0.497363	0.00055	0.00315471	0.567886	5e-05	0.000362775	0.887587	5e-05	0.000362775	0.559586	0.00015	0.000993023	0.589577	5e-05	0.000362775	0.0705228	0.60085	0.759896	0.390224	0.00405	0.0175682	0.0622226	0.6559	0.799705	0.092214	0.49865	0.681226	0.319701	0.0168	0.0569623	-0.00830011	0.951	0.975779	0.0216913	0.8744	0.935336
MAC_00689	AP-2 complex subunit sigma	97.3763	5.63023	92.104	10.8442	90.6091	5.78112	86.8364	3.39473	90.015	4.87316	100.8	6.58723	-0.0803069	0.58165	0.745831	-0.103915	0.48415	0.669279	-0.165271	0.2588	0.447016	-0.113406	0.4396	0.630209	0.0498479	0.7318	0.850315	-0.0236082	0.87255	0.934224	-0.0849641	0.5622	0.731336	-0.0330988	0.822	0.905139	0.130155	0.3742	0.569165	-0.0613559	0.67785	0.81482	-0.00949067	0.94895	0.974769	0.153763	0.29765	0.490385
MAC_00690	Uncharacterized protein	3.67377	0.272872	3.50304	0.603576	4.1418	0.969041	4.65871	1.01608	4.26425	0.314134	4.89351	0.964845	-0.0686543	0.7268	0.847314	0.172998	0.3721	0.567184	0.34267	0.0748	0.183572	0.21503	0.26565	0.454682	0.413609	0.0304	0.0917857	0.241652	0.22	0.400975	0.411324	0.0344	0.101146	0.283685	0.14745	0.302352	0.482263	0.0107	0.039467	0.169672	0.3741	0.569068	0.0420323	0.8263	0.907489	0.240611	0.2036	0.380001
MAC_00691	Uncharacterized protein	121.408	10.6987	126.601	17.1543	169.735	16.5043	99.7115	3.827	88.8803	6.49322	99.2634	3.71783	0.0604307	0.62485	0.777262	0.483421	0.00015	0.000993023	-0.284027	0.02115	0.0685833	-0.449923	0.00035	0.00212064	-0.290525	0.01955	0.0643695	0.422991	0.0005	0.0029	-0.344457	0.0055	0.0227569	-0.510353	5e-05	0.000362775	-0.350956	0.00545	0.0225793	-0.767448	5e-05	0.000362775	-0.933344	5e-05	0.000362775	-0.773947	5e-05	0.000362775
MAC_00692	Nuclear serine protease HtrA2/Nma111, putative	69.7746	1.90384	62.2453	5.2514	58.4741	5.09502	75.6579	5.38511	69.0498	1.38404	67.5249	3.61997	-0.164738	0.1775	0.345021	-0.254905	0.03395	0.100154	0.116788	0.34425	0.539829	-0.015066	0.9013	0.950337	-0.0472839	0.69905	0.828965	-0.0901669	0.45585	0.644901	0.281526	0.0201	0.0658425	0.149672	0.21935	0.400177	0.117454	0.3373	0.53269	0.371693	0.00205	0.00987573	0.239839	0.0443	0.123122	0.207621	0.0855	0.203138
MAC_00693	Uncharacterized protein	1.60897	0.840671	1.20115	0.619838	1.33636	0.65098	2.33346	0.884259	1.85599	0.914175	2.89625	1.40854	-0.421723	0.61855	0.772793	-0.267829	0.70825	0.835218	0.536333	0.4378	0.628693	0.206057	0.77855	0.879147	0.848049	0.17895	0.347	0.153893	0.8437	0.917609	0.958055	0.2442	0.430273	0.62778	0.43805	0.628885	1.26977	0.11105	0.246213	0.804162	0.22535	0.407556	0.473886	0.48365	0.668855	1.11588	0.0708	0.176142
MAC_00694	DnaJ domain protein	55.3112	2.18426	48.2361	1.69644	35.8431	3.12872	39.7613	3.28731	39.6364	2.53962	41.6493	2.34635	-0.197458	0.1051	0.236489	-0.625875	5e-05	0.000362775	-0.476205	0.0001	0.000686749	-0.480747	5e-05	0.000362775	-0.409281	0.001	0.00530838	-0.428418	0.00065	0.00364841	-0.278748	0.0238	0.0754829	-0.283289	0.0216	0.0697517	-0.211823	0.0841	0.200604	0.14967	0.22805	0.41081	0.145128	0.24425	0.430312	0.216594	0.0787	0.19084
MAC_00695	CUE domain containing protein	150.651	1.5649	154.203	25.6901	129.048	9.38567	119.058	5.9545	133.113	10.8353	124.935	9.81691	0.0336267	0.7943	0.888778	-0.223299	0.08625	0.204412	-0.339538	0.01025	0.0381042	-0.178558	0.16815	0.332202	-0.270025	0.0398	0.113362	-0.256925	0.0478	0.130563	-0.373164	0.00445	0.0190365	-0.212185	0.09845	0.225426	-0.303652	0.01955	0.0643695	-0.116239	0.37895	0.573641	0.0447409	0.7323	0.850602	-0.0467263	0.7255	0.846575
MAC_00696	NOT2 family protein	78.9152	2.48931	74.4886	4.2366	58.14	1.99184	64.0388	4.04915	65.4403	1.56041	60.8638	1.16368	-0.0832828	0.50085	0.682882	-0.440772	0.0004	0.00238366	-0.301357	0.01365	0.0480738	-0.270123	0.0298	0.0904062	-0.374718	0.00265	0.0122799	-0.35749	0.00395	0.0172033	-0.218074	0.07465	0.183291	-0.186841	0.133	0.280867	-0.291435	0.0182	0.0607965	0.139415	0.26615	0.455281	0.170649	0.1776	0.345162	0.0660545	0.59385	0.754771
MAC_00697	CobW domain protein	139.071	7.83671	118.883	3.73216	142.684	13.418	129.449	4.03062	119.444	5.88735	128.79	6.51445	-0.226282	0.06805	0.171	0.0370007	0.7641	0.8705	-0.103435	0.40065	0.594669	-0.219482	0.0781	0.189759	-0.110799	0.3711	0.566103	0.263283	0.03205	0.0957085	0.122847	0.3184	0.512679	0.00680024	0.9555	0.978001	0.115483	0.35095	0.546424	-0.140436	0.25535	0.443012	-0.256483	0.03735	0.107943	-0.1478	0.23295	0.416813
MAC_00698	Mob1/phocein family protein	63.695	1.42996	65.4149	5.96871	64.9936	2.06053	56.4475	2.40725	54.7684	1.05466	51.1886	4.83538	0.0384374	0.7626	0.869603	0.0291167	0.81755	0.902499	-0.174271	0.16045	0.321383	-0.217837	0.07715	0.18802	-0.315359	0.01125	0.041119	-0.00932067	0.9379	0.969548	-0.212709	0.0873	0.206206	-0.256274	0.03755	0.108365	-0.353797	0.0042	0.0181209	-0.203388	0.10115	0.229975	-0.246954	0.04625	0.127324	-0.344476	0.0056	0.02311
MAC_00699	C6 finger domain protein, putative	18.6984	1.68466	18.6701	1.45617	20.088	1.23547	19.9507	1.76724	20.2016	1.79317	19.5481	1.72716	-0.00218695	0.98555	0.992272	0.10342	0.45685	0.64578	0.0935255	0.5022	0.684018	0.111558	0.41735	0.610098	0.0641144	0.64265	0.790178	0.105607	0.45525	0.644294	0.0957124	0.50015	0.682406	0.113745	0.41605	0.608942	0.0663014	0.63625	0.785646	-0.00989482	0.9427	0.971846	0.00813766	0.95295	0.976693	-0.0393058	0.7766	0.877949
MAC_00700	MOSC domain containing protein	14.5708	1.41214	16.7109	1.09532	18.9722	2.26696	17.4496	1.06615	18.356	2.6485	16.2564	1.20997	0.197708	0.2488	0.43551	0.380805	0.0249	0.0782892	0.260113	0.1304	0.27689	0.33317	0.05175	0.138844	0.157925	0.35905	0.553983	0.183097	0.27415	0.46425	0.0624045	0.71935	0.842742	0.135462	0.42275	0.615267	-0.0397828	0.81665	0.901922	-0.120693	0.4695	0.656679	-0.0476351	0.7732	0.875895	-0.22288	0.1821	0.35122
MAC_00701	Condensin subunit	36.9677	1.5308	44.106	4.91246	53.0442	5.83153	47.0372	2.82395	47.9327	1.86393	44.5295	1.61642	0.254707	0.0375	0.108263	0.520929	5e-05	0.000362775	0.347536	0.00485	0.0204475	0.374743	0.0023	0.0108941	0.268494	0.02635	0.0818821	0.266222	0.02805	0.0861281	0.0928284	0.44605	0.635968	0.120035	0.32375	0.518476	0.0137867	0.91035	0.955145	-0.173393	0.155	0.313397	-0.146186	0.22825	0.411045	-0.252435	0.03745	0.108154
MAC_00702	Inner centromere protein	53.6205	2.56726	60.5908	3.96793	64.9907	4.83623	63.8583	4.14531	58.8015	1.25062	58.2196	3.93356	0.176314	0.1425	0.295125	0.277447	0.02255	0.0722031	0.252089	0.03695	0.107035	0.133067	0.27125	0.460995	0.11872	0.3272	0.522153	0.101133	0.4041	0.598071	0.0757744	0.5293	0.70569	-0.0432479	0.7205	0.843557	-0.0575947	0.6286	0.780078	-0.0253583	0.8382	0.914272	-0.144381	0.23685	0.421421	-0.158727	0.193	0.366047
MAC_00703	ATP-dependent RNA helicase mss116	328.36	9.94264	274.613	44.708	256.73	60.5166	371.302	43.9331	341.222	31.7827	372.904	46.2814	-0.257882	0.0554	0.146206	-0.355029	0.0091	0.0345759	0.177314	0.20645	0.383691	0.0554314	0.697	0.827757	0.183522	0.1893	0.361038	-0.0971468	0.4736	0.660476	0.435196	0.0021	0.0100834	0.313314	0.02435	0.0769058	0.441405	0.00205	0.00987573	0.532343	0.0002	0.00128619	0.41046	0.003	0.0136591	0.538551	0.00035	0.00212064
MAC_00704	Peroxisome targeting signal type 2 receptor	33.3533	1.50172	38.6348	2.43415	33.6971	2.83836	26.4174	2.42129	26.5456	1.94101	26.7895	0.85654	0.212072	0.1357	0.284834	0.0147953	0.9172	0.958775	-0.336339	0.0226	0.0723278	-0.329355	0.0252	0.0790527	-0.316163	0.03095	0.0930759	-0.197277	0.16005	0.320804	-0.548412	0.0002	0.00128619	-0.541428	0.00025	0.00157207	-0.528235	0.0003	0.00184856	-0.351135	0.01705	0.0576482	-0.344151	0.01865	0.0620051	-0.330958	0.02245	0.0719477
MAC_00705	Uncharacterized protein	8.43051	0.720762	11.3432	1.7107	12.7358	2.56807	9.77202	0.616296	10.842	0.591675	8.58071	1.54979	0.428135	0.00645	0.0260063	0.595201	5e-05	0.000362775	0.213036	0.1745	0.340824	0.362939	0.0201	0.0658425	0.0254759	0.86865	0.931973	0.167065	0.25535	0.443012	-0.215099	0.1576	0.317098	-0.0651961	0.66545	0.806333	-0.402659	0.0098	0.0367176	-0.382164	0.0119	0.042991	-0.232261	0.1189	0.258609	-0.569725	0.0002	0.00128619
MAC_00706	Uncharacterized protein	1.77259	0.644558	1.77445	1.25697	4.51541	1.61701	3.44883	0.216219	2.40654	0.482325	2.35838	0.252201	0.00151055	0.94865	0.974662	1.349	0.0007	0.00389376	0.960248	0.01015	0.037807	0.441098	0.2395	0.424468	0.411935	0.2775	0.468082	1.34749	0.00135	0.00688777	0.958738	0.0126	0.0450038	0.439588	0.2372	0.421881	0.410425	0.2732	0.463139	-0.388748	0.17385	0.339939	-0.907898	0.00665	0.0266847	-0.937061	0.00545	0.0225793
MAC_00707	MFS transporter, putative	7.57261	1.18605	8.55899	2.9816	7.45048	1.01027	10.3754	0.990547	9.9598	0.930959	10.5821	2.62461	0.17665	0.35405	0.549231	-0.0234566	0.90395	0.95168	0.454298	0.0137	0.0482063	0.395327	0.0314	0.0941652	0.482761	0.0093	0.0351875	-0.200107	0.2828	0.474021	0.277648	0.12485	0.268125	0.218677	0.2306	0.413893	0.306111	0.08835	0.208121	0.477755	0.00955	0.0359531	0.418783	0.02325	0.0740462	0.506218	0.0059	0.0241462
MAC_00708	Glucokinase regulator family protein, putative	7.03132	0.467063	7.96273	1.95483	6.06992	1.11145	9.03518	0.733778	9.93126	0.402138	9.20583	0.422302	0.179468	0.2875	0.479266	-0.212118	0.2275	0.410104	0.361758	0.0286	0.0874995	0.498181	0.00305	0.0138366	0.388753	0.01935	0.0638394	-0.391586	0.02625	0.0816304	0.182291	0.26435	0.453274	0.318714	0.0528	0.140974	0.209285	0.1989	0.373915	0.573876	0.0009	0.00484136	0.710299	0.0001	0.000686749	0.60087	0.0004	0.00238366
MAC_00709	Ribokinase	74.1881	5.93085	75.7937	6.94183	71.2675	8.93839	63.8366	4.5529	58.6448	6.06974	59.4741	8.12356	0.0308902	0.8138	0.900564	-0.0579429	0.65445	0.798744	-0.216804	0.094	0.217895	-0.339186	0.00795	0.0309201	-0.318925	0.01315	0.0466296	-0.0888332	0.4862	0.670913	-0.247694	0.0556	0.146569	-0.370076	0.00415	0.0179363	-0.349815	0.00665	0.0266847	-0.158861	0.2194	0.400233	-0.281243	0.02945	0.0895671	-0.260982	0.0453	0.125269
MAC_00710	Ubiquitin-conjugating enzyme	56.2741	1.22266	59.5401	5.98554	56.3099	4.82311	49.9623	3.19147	56.7067	3.0347	61.6971	3.8356	0.0813915	0.54955	0.721731	0.000919186	0.9961	0.997286	-0.171631	0.20945	0.387588	0.0110489	0.9363	0.968619	0.132733	0.3248	0.519689	-0.0804723	0.55	0.722032	-0.253022	0.06025	0.155999	-0.0703426	0.59895	0.758549	0.0513411	0.69865	0.828712	-0.17255	0.20365	0.380065	0.0101297	0.941	0.970979	0.131813	0.3236	0.518316
MAC_00711	DUF1014 domain protein	164.222	7.1258	182.869	17.5979	182.587	5.62769	162.74	16.4909	108.085	7.71573	134.698	3.16877	0.155167	0.2095	0.387646	0.152945	0.2134	0.392748	-0.0130717	0.91255	0.956244	-0.603481	5e-05	0.000362775	-0.285909	0.02105	0.0683374	-0.00222233	0.9858	0.992388	-0.168239	0.1689	0.33325	-0.758648	5e-05	0.000362775	-0.441076	0.0004	0.00238366	-0.166016	0.1772	0.344578	-0.756425	5e-05	0.000362775	-0.438854	0.00035	0.00212064
MAC_00712	MFS multidrug transporter, putative	22.6756	7.53157	6.56452	0.905433	25.3302	3.05068	65.5027	17.3132	26.7894	3.23356	25.1485	6.72498	-1.78838	5e-05	0.000362775	0.159718	0.25665	0.444524	1.53041	5e-05	0.000362775	0.240523	0.08555	0.203206	0.149331	0.29755	0.490253	1.9481	5e-05	0.000362775	3.31879	5e-05	0.000362775	2.0289	5e-05	0.000362775	1.93771	5e-05	0.000362775	1.3707	5e-05	0.000362775	0.0808051	0.55005	0.72206	-0.0103871	0.9388	0.969883
MAC_00713	Positive regulator of purine utilization	10.663	1.71805	14.1949	2.37507	17.4029	0.492047	14.6466	0.532173	16.572	0.668934	15.8709	1.01897	0.412754	0.0028	0.0128752	0.706708	5e-05	0.000362775	0.457952	0.00115	0.00599744	0.636127	5e-05	0.000362775	0.573767	5e-05	0.000362775	0.293954	0.02835	0.0868628	0.0451977	0.7403	0.85578	0.223373	0.09875	0.225951	0.161013	0.23195	0.415657	-0.248756	0.0614	0.158347	-0.0705807	0.59075	0.752429	-0.132941	0.30985	0.503505
MAC_00714	Uncharacterized protein	3.14736	1.07292	6.32828	2.53797	7.92359	1.89346	6.31293	1.92032	7.10127	1.04223	5.62423	1.71051	1.00767	0.0098	0.0367176	1.33201	0.0013	0.00666464	1.00417	0.0099	0.0370232	1.17393	0.00355	0.0157215	0.837512	0.0312	0.0936828	0.32434	0.2773	0.467865	-0.00350324	0.96265	0.981429	0.166264	0.5792	0.743932	-0.170159	0.5837	0.747266	-0.327843	0.27535	0.465667	-0.158076	0.58495	0.748197	-0.494499	0.1135	0.250116
MAC_00715	Uncharacterized protein	2.21873	0.363943	2.03865	1.12664	2.49836	0.431752	3.26499	0.647567	2.98699	0.589739	2.10996	0.755962	-0.122118	0.72905	0.848609	0.171252	0.6118	0.768085	0.557345	0.0892	0.20952	0.428959	0.20105	0.376795	-0.0725126	0.8488	0.92071	0.29337	0.40375	0.597723	0.679463	0.04815	0.131288	0.551077	0.11325	0.249751	0.0496054	0.8704	0.932958	0.386093	0.2274	0.410007	0.257707	0.42765	0.619674	-0.243765	0.4858	0.670621
MAC_00716	NHL repeat-containing protein	59.3085	9.55912	60.1516	9.00036	53.7406	3.32629	60.7849	3.33976	61.7685	5.1664	58.9602	4.35979	0.0203644	0.8719	0.933874	-0.142225	0.2628	0.45168	0.0354751	0.77735	0.878429	0.0586339	0.6404	0.788471	-0.00849797	0.94775	0.974316	-0.16259	0.1996	0.374931	0.0151107	0.9034	0.95139	0.0382695	0.76075	0.868616	-0.0288624	0.8198	0.90378	0.1777	0.15945	0.319895	0.200859	0.11175	0.24732	0.133727	0.287	0.478746
MAC_00717	Peptidase family M20/M25/M40 protein	35.4729	16.0973	79.9159	13.9043	34.6118	3.94479	36.7047	7.12168	29.1808	0.516159	30.9254	1.43069	1.17176	5e-05	0.000362775	-0.0354534	0.7768	0.878071	0.049246	0.6982	0.828415	-0.281699	0.0277	0.0852701	-0.197927	0.1231	0.265277	-1.20722	5e-05	0.000362775	-1.12252	5e-05	0.000362775	-1.45346	5e-05	0.000362775	-1.36969	5e-05	0.000362775	0.0846994	0.49295	0.676603	-0.246245	0.04665	0.128139	-0.162473	0.1885	0.359981
MAC_00718	Uncharacterized protein	363.672	23.0635	426.613	81.0287	249.965	20.6259	179.786	11.6254	153.987	16.9471	174.285	15.6617	0.230291	0.07115	0.176815	-0.540912	5e-05	0.000362775	-1.01636	5e-05	0.000362775	-1.23983	5e-05	0.000362775	-1.06119	5e-05	0.000362775	-0.771203	5e-05	0.000362775	-1.24665	5e-05	0.000362775	-1.47012	5e-05	0.000362775	-1.29148	5e-05	0.000362775	-0.475446	5e-05	0.000362775	-0.698921	5e-05	0.000362775	-0.520281	5e-05	0.000362775
MAC_00719	Vps52 / Sac2 family protein	30.1714	0.309895	32.002	3.46488	29.6135	3.87015	29.6763	3.02913	27.5572	1.85863	26.697	0.848821	0.0849813	0.56075	0.73019	-0.0269261	0.85445	0.923971	-0.0238704	0.8721	0.933935	-0.130751	0.3803	0.574992	-0.176504	0.23725	0.421952	-0.111907	0.45205	0.641538	-0.108852	0.4633	0.651375	-0.215733	0.1478	0.302795	-0.261485	0.08005	0.193379	0.00305568	0.98	0.98943	-0.103825	0.4902	0.674204	-0.149578	0.32435	0.519189
MAC_00720	WD domain containing protein	46.1841	2.12996	43.2198	4.19916	33.4552	0.684689	29.6572	0.894739	29.7195	1.87226	31.6262	1.25161	-0.0957051	0.44255	0.632819	-0.465166	0.0002	0.00128619	-0.639013	5e-05	0.000362775	-0.635989	5e-05	0.000362775	-0.546275	5e-05	0.000362775	-0.369461	0.00325	0.0146008	-0.543308	5e-05	0.000362775	-0.540284	5e-05	0.000362775	-0.45057	0.0005	0.0029	-0.173847	0.1808	0.349503	-0.170823	0.18695	0.357851	-0.081109	0.5318	0.707628
MAC_00721	Heat shock 70 kDa protein	994.579	35.258	828.372	72.9435	609.23	131.494	857.815	77.27	871.307	66.2627	877.333	65.0215	-0.263807	0.1696	0.334228	-0.707099	5e-05	0.000362775	-0.21342	0.26875	0.458274	-0.190906	0.32355	0.518269	-0.180962	0.3493	0.544728	-0.443292	0.0116	0.0421261	0.0503869	0.7856	0.883572	0.0729016	0.69295	0.824923	0.0828455	0.65405	0.798498	0.493678	0.006	0.0244806	0.516193	0.00435	0.0186704	0.526137	0.00335	0.0149749
MAC_00722	Signal recognition particle subunit SRP68	134.752	15.0388	139.336	13.7792	156.663	4.81963	122.585	8.17109	117.706	4.40145	131.724	10.2192	0.0482632	0.6976	0.828145	0.217364	0.0777	0.189042	-0.136524	0.2639	0.452814	-0.195112	0.10955	0.243852	-0.0327869	0.7936	0.888378	0.169101	0.17025	0.335106	-0.184787	0.13205	0.279482	-0.243375	0.0458	0.126351	-0.0810501	0.50765	0.688247	-0.353889	0.00435	0.0186704	-0.412477	0.0008	0.00436954	-0.250151	0.04155	0.117241
MAC_00723	SNF2 family helicase/ATPase, putative	15.1459	0.9839	18.5963	0.795461	15.7662	1.03289	15.2021	0.772817	15.5659	1.14277	16.0712	0.820178	0.296087	0.02055	0.0670254	0.0579019	0.6543	0.798639	0.00533799	0.9665	0.983074	0.0394543	0.75925	0.867675	0.0855449	0.5087	0.68913	-0.238185	0.06125	0.158065	-0.290749	0.0229	0.0731318	-0.256632	0.0455	0.125696	-0.210542	0.10175	0.23104	-0.0525639	0.686	0.820456	-0.0184476	0.88445	0.941079	0.0276431	0.8283	0.908587
MAC_00724	Spindle pole body component	24.9433	2.13429	29.1175	0.372515	32.7431	1.4055	30.3902	1.89399	31.7084	1.07932	29.936	1.20523	0.223236	0.07395	0.181985	0.392538	0.00175	0.00861936	0.284955	0.0225	0.0720819	0.346212	0.00525	0.0218665	0.26323	0.03385	0.0999231	0.169302	0.1712	0.3363	0.0617195	0.61565	0.770787	0.122976	0.32095	0.515518	0.0399938	0.7469	0.859951	-0.107583	0.38315	0.577834	-0.0463258	0.70765	0.834709	-0.129308	0.29375	0.486083
MAC_00725	Proteasome subunit alpha type	249.23	12.1732	253.292	19.0275	234.726	15.0348	239.575	7.08646	228.466	5.28313	218.855	1.41948	0.0233222	0.8475	0.919925	-0.086501	0.48015	0.665961	-0.0570001	0.6429	0.790352	-0.125497	0.3011	0.494106	-0.187503	0.12055	0.261125	-0.109823	0.37265	0.567674	-0.0803223	0.5122	0.692011	-0.148819	0.2228	0.404449	-0.210825	0.0812	0.195485	0.0295008	0.81045	0.898455	-0.0389959	0.74975	0.86155	-0.101002	0.41085	0.604052
MAC_00726	C6 finger domain protein, putative	63.5403	4.99855	115.286	20.135	114.574	14.9585	91.878	2.9194	120.098	4.99101	91.0007	10.2382	0.859474	5e-05	0.000362775	0.850541	5e-05	0.000362775	0.532049	5e-05	0.000362775	0.918464	5e-05	0.000362775	0.518206	5e-05	0.000362775	-0.00893295	0.9427	0.971846	-0.327425	0.00855	0.0328239	0.0589902	0.6411	0.789028	-0.341268	0.00625	0.0253328	-0.318492	0.00965	0.0362615	0.0679232	0.58815	0.750477	-0.332335	0.0069	0.0275325
MAC_00727	rRNA processing protein Rrp8, putative	66.2173	3.6196	55.9621	17.9778	59.3267	11.1254	87.1572	11.4236	82.4455	5.03698	86.8656	8.36526	-0.242759	0.0556	0.146569	-0.158528	0.2052	0.382064	0.39641	0.00115	0.00599744	0.316232	0.0111	0.0406735	0.391576	0.00195	0.00946249	0.0842315	0.49865	0.681226	0.639169	5e-05	0.000362775	0.558991	5e-05	0.000362775	0.634336	5e-05	0.000362775	0.554938	5e-05	0.000362775	0.474759	0.0002	0.00128619	0.550104	5e-05	0.000362775
MAC_00728	DNA damage-inducible protein 1	110.527	7.09399	134.434	10.7929	128.503	3.26456	98.9024	3.57615	83.2354	6.35979	83.0298	0.995271	0.2825	0.0202	0.0661039	0.217402	0.073	0.180246	-0.160325	0.1908	0.363076	-0.409133	0.0012	0.00621755	-0.412702	0.0008	0.00436954	-0.0650977	0.5955	0.756034	-0.442825	0.0004	0.00238366	-0.691633	5e-05	0.000362775	-0.695202	5e-05	0.000362775	-0.377727	0.00225	0.0106898	-0.626535	5e-05	0.000362775	-0.630104	5e-05	0.000362775
MAC_00729	Polyamine acetyltransferase	51.4843	1.50757	62.1132	13.0537	63.6553	3.97439	53.8542	6.51693	58.9543	2.38628	47.0699	1.61832	0.270769	0.04335	0.121158	0.306149	0.02175	0.0701524	0.0649275	0.63915	0.787633	0.195465	0.14825	0.303482	-0.129327	0.3536	0.548847	0.0353807	0.7819	0.881234	-0.205841	0.12745	0.272289	-0.0753032	0.56725	0.734901	-0.400096	0.0038	0.016652	-0.241222	0.07295	0.180173	-0.110684	0.40375	0.597723	-0.435477	0.0015	0.00754603
MAC_00730	Orotate phosphoribosyltransferase	218.638	8.04807	185.751	10.4747	178.797	19.6877	204.687	22.413	191.032	17.3313	242.677	21.687	-0.23517	0.05525	0.145925	-0.290221	0.01675	0.0568269	-0.0951229	0.4363	0.62727	-0.194725	0.1101	0.244726	0.150495	0.21575	0.395762	-0.0550507	0.65505	0.799178	0.140047	0.25595	0.44367	0.0404451	0.73825	0.854411	0.385665	0.00165	0.008192	0.195098	0.11365	0.250363	0.0954958	0.43535	0.626469	0.440716	0.00045	0.00264476
MAC_00731	Nucleolar GTP-binding protein 1	123.365	5.59936	101.609	33.2062	93.3241	25.9262	168.893	19.8713	152.331	13.0529	172.048	18.1985	-0.279907	0.0262	0.0815096	-0.402608	0.00105	0.00553695	0.453182	0.00025	0.00157207	0.304277	0.01325	0.046904	0.479882	0.00015	0.000993023	-0.122701	0.3343	0.529733	0.733089	5e-05	0.000362775	0.584185	5e-05	0.000362775	0.759789	5e-05	0.000362775	0.85579	5e-05	0.000362775	0.706885	5e-05	0.000362775	0.882489	5e-05	0.000362775
MAC_00732	Rab GDP dissociation inhibitor	450.927	23.717	425.217	24.6229	542.277	24.7747	499.158	26.5511	359.111	39.0358	402.265	13.928	-0.084693	0.5435	0.716827	0.266136	0.0651	0.165485	0.146603	0.3026	0.495725	-0.328465	0.0179	0.0599956	-0.164747	0.2364	0.420892	0.350829	0.0146	0.0508127	0.231296	0.09995	0.22798	-0.243772	0.07455	0.183107	-0.0800545	0.5602	0.729741	-0.119533	0.41075	0.603998	-0.594601	5e-05	0.000362775	-0.430883	0.0029	0.013262
MAC_00733	50S ribosomal protein L4	362.538	6.78691	301.833	22.2	267.148	27.589	323.081	16.933	342.703	16.5158	331.101	14.9161	-0.264385	0.02925	0.0890808	-0.440496	0.00015	0.000993023	-0.166238	0.1692	0.333662	-0.0811756	0.5056	0.686657	-0.130863	0.2824	0.473581	-0.176111	0.1464	0.300794	0.0981475	0.4261	0.618184	0.18321	0.1255	0.269107	0.133523	0.2754	0.465714	0.274259	0.0232	0.0739172	0.359321	0.0032	0.0144079	0.309634	0.0106	0.0391527
MAC_00734	C2H2 transcription factor	172.621	2.04832	181.263	22.959	136.638	10.2402	182.741	11.59	143.429	5.29913	145.572	7.12557	0.0704791	0.58975	0.751702	-0.337247	0.01005	0.0374794	0.0821948	0.52585	0.703034	-0.267273	0.03945	0.112597	-0.245873	0.0619	0.159333	-0.407726	0.00175	0.00861936	0.0117157	0.9261	0.96324	-0.337752	0.01035	0.0384105	-0.316352	0.01705	0.0576482	0.419442	0.0014	0.00710529	0.0699745	0.58635	0.749187	0.0913745	0.47735	0.663475
MAC_00735	Fatty acid activator Faa4, putative	312.332	47.0737	276.333	54.9725	283.848	26.1945	297.092	27.7775	305.108	18.562	314.866	32.5264	-0.176676	0.2955	0.487993	-0.137964	0.41655	0.609451	-0.0721735	0.6662	0.806848	-0.0337599	0.8392	0.914864	0.0116554	0.94255	0.971812	0.0387118	0.8159	0.901549	0.104502	0.53685	0.711525	0.142916	0.3975	0.591674	0.188331	0.27015	0.459779	0.0657905	0.69965	0.829392	0.104204	0.5387	0.713035	0.149619	0.37875	0.573492
MAC_00736	DUF500 domain protein	75.2206	3.23221	79.608	19.6083	54.626	5.26253	42.6643	1.25832	40.4498	1.98671	39.3575	1.88124	0.0817857	0.50405	0.685532	-0.461541	0.0003	0.00184856	-0.818097	5e-05	0.000362775	-0.894997	5e-05	0.000362775	-0.934489	5e-05	0.000362775	-0.543327	5e-05	0.000362775	-0.899883	5e-05	0.000362775	-0.976782	5e-05	0.000362775	-1.01627	5e-05	0.000362775	-0.356556	0.00405	0.0175682	-0.433456	0.0002	0.00128619	-0.472948	0.0002	0.00128619
MAC_00737	Actin-like protein arp9	95.471	5.10249	85.0328	4.3129	87.8388	10.0598	94.9367	1.07473	98.5562	4.09501	91.6961	5.03094	-0.167042	0.17035	0.335239	-0.120203	0.32685	0.521802	-0.00809707	0.94625	0.973619	0.0458849	0.70995	0.836367	-0.0582017	0.63125	0.782103	0.046839	0.69845	0.828561	0.158945	0.18815	0.359517	0.212927	0.0809	0.194963	0.108841	0.37075	0.565757	0.112106	0.35495	0.550099	0.166088	0.17035	0.335239	0.0620017	0.61075	0.767285
MAC_00738	MATE efflux family protein subfamily, putative	26.5567	2.29868	36.3056	1.89238	26.4957	3.25464	34.89	4.63827	28.8849	1.14658	32.9973	5.45072	0.451116	0.00065	0.00364841	-0.00331789	0.97985	0.989359	0.393736	0.00295	0.013463	0.121237	0.3543	0.549481	0.313268	0.0184	0.0613148	-0.454434	0.00075	0.00413583	-0.05738	0.6548	0.798998	-0.329879	0.00815	0.0315393	-0.137848	0.2827	0.473879	0.397054	0.00275	0.0126842	0.124555	0.3413	0.536854	0.316586	0.01645	0.0560076
MAC_00739	Tyrosyl-DNA phosphodiesterase, putative	33.4536	0.617052	35.5314	2.67677	34.9676	3.37381	40.195	3.5192	38.9801	1.24274	41.4951	2.1807	0.0869328	0.56385	0.732525	0.0638585	0.6716	0.81047	0.264855	0.0782	0.189942	0.220574	0.1413	0.293372	0.310779	0.0373	0.107828	-0.0230744	0.8755	0.935917	0.177922	0.22855	0.411436	0.133642	0.36595	0.560881	0.223846	0.13195	0.279385	0.200997	0.1717	0.337006	0.156716	0.28865	0.480513	0.24692	0.0969	0.2228
MAC_00740	Disulfide isomerase	169.281	7.95144	157.847	4.8481	120.6	3.35692	154.468	5.60684	159.913	3.34715	148.78	11.4988	-0.100888	0.42025	0.612711	-0.489189	5e-05	0.000362775	-0.132108	0.28805	0.479835	-0.0821337	0.51115	0.691132	-0.186241	0.14035	0.291891	-0.388301	0.0021	0.0100834	-0.0312198	0.8043	0.89453	0.0187547	0.8846	0.941142	-0.0853532	0.497	0.679875	0.357081	0.00405	0.0175682	0.407056	0.00105	0.00553695	0.302948	0.01565	0.0538183
MAC_00741	Putative acetyltransferase	134.62	9.33378	128.04	1.92949	118.949	12.3861	113.159	9.8191	126.575	8.83879	125.256	9.71525	-0.0723003	0.593	0.754106	-0.178553	0.19025	0.362317	-0.250549	0.0707	0.175964	-0.0889074	0.51295	0.692611	-0.104013	0.44335	0.633534	-0.106253	0.44095	0.63138	-0.178249	0.2029	0.379223	-0.0166071	0.90585	0.952656	-0.0317126	0.8192	0.903455	-0.0719958	0.60965	0.766499	0.0896458	0.5174	0.696157	0.0745402	0.59325	0.754309
MAC_00742	Ribonuclease T2	109.288	13.1123	107.918	18.3654	100.625	9.68027	93.7752	6.4048	113.263	16.5667	101.441	13.5095	-0.0181914	0.88455	0.941104	-0.119146	0.335	0.530464	-0.220854	0.07845	0.190386	0.0515376	0.67825	0.815104	-0.107497	0.3854	0.580011	-0.100955	0.4173	0.610061	-0.202662	0.10595	0.237894	0.069729	0.57535	0.741198	-0.0893052	0.4757	0.662144	-0.101708	0.42025	0.612711	0.170684	0.167	0.330607	0.0116494	0.9283	0.96444
MAC_00743	Protein translocation protein, Sec62 family protein	175.471	9.95158	198.62	0.636268	133.66	5.95579	160.614	6.05304	178.263	4.61159	169.136	9.69276	0.178776	0.14015	0.291592	-0.39266	0.0015	0.00754603	-0.127631	0.2871	0.478842	0.0227775	0.8522	0.922604	-0.0530449	0.66325	0.80478	-0.571436	5e-05	0.000362775	-0.306407	0.01155	0.0419702	-0.155998	0.19275	0.365712	-0.231821	0.05235	0.140052	0.265029	0.02875	0.0878591	0.415437	0.00045	0.00264476	0.339615	0.00435	0.0186704
MAC_00744	Uncharacterized protein	130.871	8.85376	119.099	14.1366	110.031	10.959	100.863	10.8516	101.561	5.06592	121.929	16.7864	-0.135983	0.32425	0.519076	-0.250242	0.07315	0.180502	-0.37575	0.0084	0.0323248	-0.365803	0.00885	0.0337869	-0.102107	0.45295	0.642332	-0.114259	0.41415	0.607053	-0.239767	0.0892	0.20952	-0.22982	0.10385	0.23446	0.0338762	0.807	0.896275	-0.125508	0.373	0.567971	-0.115561	0.4141	0.607002	0.148135	0.2858	0.47734
MAC_00745	Uncharacterized protein	18.9132	1.16956	25.3278	3.11989	20.9509	1.68452	27.0984	3.30291	27.7554	0.284627	29.2334	2.56321	0.421329	0.00185	0.00904247	0.14762	0.2656	0.454634	0.518811	0.0001	0.000686749	0.553375	5e-05	0.000362775	0.628224	5e-05	0.000362775	-0.273708	0.03515	0.102904	0.0974823	0.44375	0.63388	0.132046	0.29985	0.49275	0.206895	0.10505	0.236398	0.371191	0.0048	0.0202711	0.405755	0.0018	0.00883347	0.480604	0.00025	0.00157207
MAC_00746	KH domain-containing protein	46.6979	3.09056	58.189	7.92162	53.0531	3.94486	48.0442	3.9187	49.8477	2.10393	47.5953	4.59969	0.317389	0.00835	0.0321652	0.184081	0.12965	0.275735	0.041006	0.7374	0.853895	0.0941701	0.43545	0.626555	0.027462	0.82255	0.905464	-0.133308	0.269	0.45853	-0.276383	0.021	0.0682053	-0.223219	0.0618	0.159134	-0.289927	0.0165	0.0561471	-0.143075	0.231	0.414468	-0.0899105	0.45395	0.643186	-0.156619	0.19225	0.365031
MAC_00747	Uncharacterized protein	15.333	3.27732	12.2442	2.87886	14.5278	2.04278	16.6938	4.58895	18.1456	0.754192	18.4757	2.92938	-0.324544	0.0554	0.146206	-0.0778229	0.6329	0.783298	0.122677	0.4371	0.628101	0.242979	0.12535	0.268892	0.268992	0.0886	0.208528	0.246721	0.1488	0.304238	0.44722	0.0078	0.0304366	0.567523	0.0006	0.00340137	0.593535	0.00025	0.00157207	0.2005	0.2158	0.395831	0.320802	0.04675	0.128337	0.346815	0.0298	0.0904062
MAC_00748	Oligopeptide transporter	1.87253	0.229347	2.58793	0.557184	3.15139	0.134312	3.34436	0.634256	2.99902	0.138549	2.7454	0.392239	0.466812	0.0522	0.139753	0.750999	0.00145	0.0073241	0.83674	0.0006	0.00340137	0.679502	0.0044	0.0188498	0.552026	0.02025	0.0662362	0.284187	0.19455	0.368101	0.369928	0.08935	0.209793	0.21269	0.334	0.529366	0.0852139	0.69825	0.828442	0.0857414	0.68225	0.817857	-0.0714966	0.73785	0.854186	-0.198973	0.35095	0.546424
MAC_00749	Nitrogen metabolite repression-(Nmr)-responsible protein	33.969	5.25057	44.5839	9.35475	51.0293	5.78022	42.8478	3.22028	41.7151	2.06608	44.1174	3.09345	0.392302	0.0027	0.0124786	0.587106	0.0001	0.000686749	0.335	0.0105	0.038856	0.29635	0.02645	0.0821415	0.377126	0.0036	0.0159129	0.194805	0.12805	0.273229	-0.0573015	0.65295	0.797695	-0.0959521	0.45965	0.648251	-0.0151753	0.9037	0.951505	-0.252106	0.0492	0.133519	-0.290757	0.0246	0.0775439	-0.20998	0.1033	0.233536
MAC_00750	Fungal specific transcription factor, putative	11.9862	0.492319	14.4994	2.59662	11.7317	0.389254	11.8516	0.610315	12.1315	0.426509	12.675	0.847881	0.274623	0.0754	0.18471	-0.0309582	0.8437	0.917609	-0.0162888	0.91535	0.957654	0.0173885	0.9096	0.954736	0.0806152	0.59965	0.759011	-0.305581	0.0475	0.129917	-0.290912	0.0594	0.154263	-0.257235	0.0927	0.215653	-0.194008	0.19995	0.375299	0.0146694	0.92745	0.963967	0.0483467	0.75925	0.867675	0.111573	0.47295	0.659925
MAC_00751	FCF1 small subunit	99.456	2.57947	83.7744	21.3113	77.212	16.8062	124.078	10.7202	114.369	1.96568	125.075	14.7275	-0.247548	0.0723	0.17899	-0.365232	0.0084	0.0323248	0.319123	0.0161	0.0550827	0.201571	0.1368	0.28649	0.330668	0.0132	0.0467669	-0.117684	0.40815	0.60186	0.566671	5e-05	0.000362775	0.449119	0.00065	0.00364841	0.578216	5e-05	0.000362775	0.684355	5e-05	0.000362775	0.566803	0.00015	0.000993023	0.6959	5e-05	0.000362775
MAC_00752	Putative replication factor C	54.1632	3.14273	48.8268	1.35427	74.358	7.94254	79.2837	2.97929	75.3188	1.60697	69.8093	5.77224	-0.149638	0.25455	0.44208	0.457177	0.00025	0.00157207	0.549713	5e-05	0.000362775	0.475699	0.00045	0.00264476	0.366107	0.0054	0.0223998	0.606815	5e-05	0.000362775	0.699351	5e-05	0.000362775	0.625337	5e-05	0.000362775	0.515745	0.0001	0.000686749	0.0925364	0.4556	0.644628	0.0185218	0.88295	0.94019	-0.09107	0.47025	0.657374
MAC_00753	Uncharacterized protein	170.547	12.3301	172.317	15.3486	164.725	11.8706	154.497	21.7774	145.903	13.5834	143.927	2.51077	0.0148945	0.9162	0.958156	-0.0501134	0.7266	0.847274	-0.142591	0.32705	0.522007	-0.22516	0.1196	0.259687	-0.244838	0.0935	0.217039	-0.0650079	0.65225	0.797216	-0.157485	0.2775	0.468082	-0.240054	0.0967	0.222496	-0.259732	0.07205	0.17852	-0.0924775	0.5235	0.700984	-0.175047	0.2311	0.414605	-0.194724	0.1819	0.350932
MAC_00754	Derlin	92.514	8.55056	122.052	9.20681	98.1129	13.0527	126.851	2.92738	116.774	16.7871	125.18	10.7256	0.39975	0.005	0.020974	0.0847713	0.56145	0.73075	0.455389	0.00165	0.008192	0.335971	0.0203	0.0663701	0.436257	0.0027	0.0124786	-0.314979	0.03145	0.0942856	0.055639	0.6943	0.825922	-0.0637795	0.6546	0.798888	0.0365064	0.79525	0.889433	0.370618	0.0096	0.0361107	0.251199	0.07905	0.19151	0.351485	0.01505	0.052102
MAC_00755	Putative exo-alpha-sialidase / neuraminidase	66.3795	8.00571	109.592	36.1215	226.443	14.395	131.193	27.4489	221.477	31.3706	165.077	8.48328	0.723338	5e-05	0.000362775	1.77034	5e-05	0.000362775	0.982879	5e-05	0.000362775	1.73835	5e-05	0.000362775	1.31433	5e-05	0.000362775	1.047	5e-05	0.000362775	0.259541	0.03765	0.108598	1.01501	5e-05	0.000362775	0.590992	5e-05	0.000362775	-0.787457	5e-05	0.000362775	-0.0319893	0.7994	0.891662	-0.456006	0.0005	0.0029
MAC_00756	Protein amidase	101.795	18.3709	98.9268	11.7872	104.918	3.74608	68.0387	8.5463	108.132	2.14341	89.9944	6.16502	-0.0412401	0.7434	0.85781	0.043589	0.7346	0.852176	-0.581246	5e-05	0.000362775	0.0871186	0.48965	0.673761	-0.177765	0.1568	0.315877	0.0848291	0.4949	0.678135	-0.540006	5e-05	0.000362775	0.128359	0.30295	0.496154	-0.136525	0.2701	0.459732	-0.624835	5e-05	0.000362775	0.0435296	0.73015	0.849302	-0.221354	0.07555	0.185001
MAC_00757	Uncharacterized protein	82.2382	10.7033	69.5692	9.30229	193.472	1.80411	158.284	36.3255	337.799	23.2702	232.126	19.1577	-0.24136	0.05265	0.140673	1.23424	5e-05	0.000362775	0.944637	5e-05	0.000362775	2.03828	5e-05	0.000362775	1.49702	5e-05	0.000362775	1.4756	5e-05	0.000362775	1.186	5e-05	0.000362775	2.27964	5e-05	0.000362775	1.73838	5e-05	0.000362775	-0.289606	0.0193	0.0637082	0.804041	5e-05	0.000362775	0.262783	0.03365	0.0994578
MAC_00758	Uncharacterized protein	428.605	16.5828	324.889	73.6228	309.073	72.5646	481.24	60.8613	484.664	22.7626	498.057	43.6826	-0.399704	0.0025	0.011687	-0.471703	0.0005	0.0029	0.167106	0.2269	0.409378	0.177336	0.1966	0.37088	0.216661	0.11375	0.250525	-0.0719989	0.5822	0.746191	0.566811	0.00015	0.000993023	0.577041	5e-05	0.000362775	0.616366	5e-05	0.000362775	0.638809	5e-05	0.000362775	0.649039	5e-05	0.000362775	0.688364	5e-05	0.000362775
MAC_00759	SAC3/GANP family protein	23.8281	0.475504	26.2726	1.71841	25.1938	1.06076	26.3225	1.501	26.1861	1.63704	25.1639	1.66726	0.140892	0.2468	0.433302	0.0804041	0.51115	0.691132	0.143631	0.2418	0.427333	0.136135	0.26935	0.458907	0.0786884	0.5245	0.701809	-0.0604879	0.622	0.77536	0.00273923	0.9819	0.990328	-0.00475659	0.9678	0.983732	-0.0622035	0.61775	0.772212	0.0632271	0.6067	0.764242	0.0557313	0.64825	0.79434	-0.00171565	0.98955	0.993959
MAC_00760	WD-repeat protein, putative	3.05448	0.587721	3.78362	1.23669	3.32825	0.57308	3.7301	1.36501	3.1855	1.05477	2.60521	0.310958	0.308841	0.2653	0.454352	0.123839	0.6532	0.79786	0.28829	0.29845	0.491228	0.0605918	0.8267	0.907712	-0.229525	0.4305	0.622173	-0.185002	0.49155	0.675389	-0.0205509	0.9286	0.964614	-0.248249	0.3654	0.560355	-0.538366	0.06335	0.162173	0.164451	0.5486	0.720947	-0.0632472	0.8177	0.902544	-0.353364	0.224	0.405917
MAC_00761	Siderochrome-iron transporter, putative	61.3509	4.15414	54.4561	7.10312	64.6922	9.97827	98.975	4.93517	94.6633	4.72425	88.7571	1.59539	-0.17199	0.16815	0.332202	0.0765056	0.53245	0.708107	0.689979	5e-05	0.000362775	0.62572	5e-05	0.000362775	0.532777	5e-05	0.000362775	0.248496	0.04475	0.124073	0.861969	5e-05	0.000362775	0.797711	5e-05	0.000362775	0.704767	5e-05	0.000362775	0.613473	5e-05	0.000362775	0.549215	5e-05	0.000362775	0.456271	0.0005	0.0029
MAC_00762	Low-temperature viability protein ltv1	41.9653	4.18857	42.7994	11.8964	47.9406	8.29221	57.6028	6.77443	48.3056	5.04206	60.8128	8.37379	0.0283927	0.841	0.915938	0.19205	0.15265	0.309976	0.456943	0.0008	0.00436954	0.202993	0.13035	0.276807	0.535177	0.00015	0.000993023	0.163657	0.22465	0.406692	0.42855	0.00185	0.00904247	0.1746	0.1943	0.367779	0.506785	0.00015	0.000993023	0.264893	0.04625	0.127324	0.0109428	0.93405	0.967549	0.343127	0.00985	0.0368694
MAC_00763	Ribosome biogenesis GTPase Lsg1, putative	59.1275	6.11794	59.595	11.1716	63.7692	7.92429	63.7103	8.13172	54.8202	4.38823	66.2767	6.87335	0.0113625	0.92225	0.9613	0.109032	0.3757	0.570533	0.107697	0.37305	0.568033	-0.109122	0.36905	0.56402	0.164673	0.176	0.342941	0.0976692	0.4269	0.618955	0.0963344	0.4266	0.618671	-0.120485	0.3256	0.520541	0.15331	0.21495	0.394714	-0.00133476	0.99155	0.9949	-0.218154	0.0746	0.183186	0.0556413	0.64795	0.794113
MAC_00764	Uncharacterized protein	2.25957	0.55592	2.31525	0.784566	2.75711	0.668775	3.67351	1.03927	3.03007	0.356793	3.0017	0.629916	0.0351244	0.88155	0.93935	0.287109	0.2444	0.430454	0.701113	0.0039	0.0170189	0.423308	0.0822	0.197221	0.409733	0.09695	0.222869	0.251985	0.30585	0.499156	0.665989	0.0052	0.0216829	0.388183	0.10865	0.242386	0.374609	0.12945	0.275436	0.414004	0.0726	0.179529	0.136199	0.56945	0.7368	0.122624	0.60975	0.766601
MAC_00765	Uncharacterized protein	0	0	0	0	0.0239983	0.0415663	0	0	0.0513855	0.0457815	0.0302036	0.0523142	0	1	1	inf	1	1	0	1	1	inf	1	1	inf	1	1	inf	1	1	0	1	1	inf	1	1	inf	1	1	#NAME?	1	1	1.09843	1	1	0.33179	1	1
MAC_00766	Nonribosomal peptide synthetase 4	0.127009	0.219987	0	0	0	0	0.0394723	0.0683681	0	0	0.057989	0.10044	#NAME?	1	1	#NAME?	1	1	-1.68602	1	1	#NAME?	1	1	-1.13108	1	1	0	1	1	inf	1	1	0	1	1	inf	1	1	inf	1	1	0	1	1	inf	1	1
MAC_00768	DUF895 domain protein	6.67877	0.65903	5.8824	0.528603	16.6211	1.48888	15.5357	0.95524	10.5954	1.15948	14.5516	1.59752	-0.183177	0.35565	0.550751	1.31536	5e-05	0.000362775	1.21793	5e-05	0.000362775	0.665782	0.00035	0.00212064	1.12353	5e-05	0.000362775	1.49854	5e-05	0.000362775	1.40111	5e-05	0.000362775	0.848959	5e-05	0.000362775	1.3067	5e-05	0.000362775	-0.0974304	0.5282	0.704948	-0.649581	0.00025	0.00157207	-0.191836	0.2151	0.394913
MAC_00769	Uncharacterized protein	8.40454	0.122023	9.62228	1.32125	11.3701	1.28511	11.1968	0.861684	11.7309	0.320007	10.7209	0.748351	0.19521	0.204	0.380507	0.436	0.00515	0.0215076	0.413842	0.0075	0.0294851	0.481077	0.00185	0.00904247	0.35119	0.02155	0.0696228	0.24079	0.1065	0.238836	0.218632	0.1401	0.291517	0.285867	0.0533	0.141998	0.15598	0.30015	0.493035	-0.0221573	0.88325	0.940381	0.0450776	0.7663	0.871873	-0.0848097	0.56725	0.734901
MAC_00770	Pentafunctional AROM polypeptide, putative	4.0662	0.72625	4.79614	0.345173	7.13619	0.713855	7.1128	0.394686	6.25191	0.342518	6.72215	0.538216	0.238193	0.2095	0.387646	0.811471	5e-05	0.000362775	0.806736	5e-05	0.000362775	0.620615	0.0008	0.00436954	0.725241	0.0001	0.000686749	0.573279	0.0016	0.00797782	0.568543	0.0015	0.00754603	0.382422	0.033	0.0979367	0.487048	0.0077	0.0301135	-0.00473512	0.97415	0.986589	-0.190856	0.2692	0.458727	-0.0862304	0.6131	0.769057
MAC_00771	Glyoxalase/bleomycin resistance protein/dioxygenase	15.2028	3.98806	12.2238	1.22899	13.6206	1.14848	13.5796	8.12718	19.3726	4.45003	18.5162	4.52988	-0.314645	0.21045	0.388866	-0.158547	0.51685	0.695823	-0.162898	0.51725	0.696105	0.34968	0.1307	0.27738	0.28445	0.22555	0.407776	0.156097	0.5339	0.709285	0.151747	0.5565	0.726908	0.664324	0.0076	0.029802	0.599094	0.01585	0.0543889	-0.00435087	0.9742	0.986594	0.508227	0.0342	0.100708	0.442997	0.0699	0.174475
MAC_00772	Histone H1-binding protein	111.82	4.17363	110.617	3.35297	105.018	6.30291	101.964	4.04723	106.616	9.96762	103.275	0.774122	-0.0155977	0.89865	0.948902	-0.0905466	0.44905	0.638709	-0.133114	0.27235	0.462234	-0.0687576	0.5686	0.736076	-0.11468	0.34255	0.538221	-0.0749489	0.53495	0.710088	-0.117516	0.33235	0.527719	-0.0531599	0.6627	0.804402	-0.0990819	0.41155	0.604688	-0.042567	0.7243	0.845865	0.0217889	0.85495	0.924231	-0.024133	0.83955	0.915015
MAC_00773	U3 small nucleolar ribonucleoprotein protein MPP10	40.4394	0.621205	44.869	12.3355	45.2458	5.82041	66.1057	6.18261	59.7455	2.55497	60.1792	3.07749	0.14996	0.23335	0.417306	0.162023	0.1906	0.362817	0.709013	5e-05	0.000362775	0.56307	5e-05	0.000362775	0.573505	5e-05	0.000362775	0.0120634	0.9238	0.962086	0.559054	5e-05	0.000362775	0.41311	0.00075	0.00413583	0.423545	0.0007	0.00389376	0.54699	5e-05	0.000362775	0.401047	0.0009	0.00484136	0.411482	0.0006	0.00340137
MAC_00774	Uncharacterized protein	55.519	1.68521	57.021	6.11502	54.8204	1.33509	45.8398	1.27679	49.5137	1.49125	48.4691	2.3217	0.0385118	0.7581	0.866942	-0.0182685	0.88145	0.939276	-0.27638	0.0254	0.0795398	-0.165155	0.1818	0.350804	-0.195916	0.1134	0.250002	-0.0567803	0.64075	0.788761	-0.314891	0.0106	0.0391527	-0.203667	0.0961	0.22148	-0.234428	0.05465	0.144752	-0.258111	0.0364	0.105787	-0.146886	0.23015	0.413348	-0.177648	0.1477	0.302655
MAC_00775	Putative chloroperoxidase	2.01318	0.0873194	3.15822	0.734523	3.4109	0.40018	3.09283	0.715236	3.0835	0.724664	3.80173	1.21151	0.649631	0.0656	0.166436	0.760675	0.03105	0.093327	0.619451	0.07785	0.189314	0.615091	0.07785	0.189314	0.917179	0.0109	0.0400835	0.111044	0.71075	0.836901	-0.0301801	0.92115	0.960661	-0.0345401	0.89765	0.948272	0.267548	0.3786	0.573369	-0.141224	0.6393	0.787747	-0.145584	0.634	0.784074	0.156504	0.59445	0.755202
MAC_00776	Uncharacterized protein	418.714	11.9429	396.492	21.328	350.862	5.45982	316.937	9.96709	262.6	12.839	275.573	6.27755	-0.0786721	0.5846	0.747911	-0.255063	0.07135	0.177181	-0.401767	0.0043	0.018487	-0.673097	5e-05	0.000362775	-0.60353	5e-05	0.000362775	-0.176391	0.211	0.389628	-0.323094	0.02305	0.0735353	-0.594425	5e-05	0.000362775	-0.524858	0.00035	0.00212064	-0.146704	0.2897	0.481707	-0.418035	0.0022	0.0104899	-0.348467	0.0099	0.0370232
MAC_00777	Subtilisin-like protease PR1G	0.518144	0.207516	0.562762	0.127453	0.692427	0.508377	0.775473	0.133267	0.596059	0.289866	0.448097	0.282236	0.119172	1	1	0.41831	1	1	0.581725	1	1	0.202103	1	1	-0.209542	1	1	0.299138	1	1	0.462553	1	1	0.0829311	1	1	-0.328714	1	1	0.163415	1	1	-0.216207	1	1	-0.627852	1	1
MAC_00778	C6 transcription factor, putative	21.8204	0.979838	34.0388	3.6396	25.6226	2.33671	16.2523	1.07322	17.2735	1.58776	18.2503	0.47722	0.641505	5e-05	0.000362775	0.231745	0.0769	0.187565	-0.425034	0.0017	0.00840203	-0.337116	0.0122	0.0438596	-0.257752	0.0536	0.142623	-0.40976	0.00165	0.008192	-1.06654	5e-05	0.000362775	-0.978621	5e-05	0.000362775	-0.899256	5e-05	0.000362775	-0.656779	5e-05	0.000362775	-0.568861	5e-05	0.000362775	-0.489496	0.00025	0.00157207
MAC_00779	L-Rhamnonate Dehydratase	44.679	3.51798	96.5311	8.65922	131.031	19.076	49.9918	3.364	23.4086	2.39545	21.6487	3.89032	1.1114	5e-05	0.000362775	1.55224	5e-05	0.000362775	0.162094	0.2173	0.397738	-0.932556	5e-05	0.000362775	-1.04532	5e-05	0.000362775	0.440841	0.00025	0.00157207	-0.949303	5e-05	0.000362775	-2.04395	5e-05	0.000362775	-2.15672	5e-05	0.000362775	-1.39014	5e-05	0.000362775	-2.48479	5e-05	0.000362775	-2.59756	5e-05	0.000362775
MAC_00780	Uncharacterized protein	3.85139	1.05022	5.3177	1.53363	3.74211	1.20839	4.6798	1.19965	3.52918	1.63975	3.80004	1.18629	0.465424	0.0681	0.171084	-0.0415259	0.87155	0.933611	0.281069	0.26995	0.459558	-0.126044	0.6373	0.786366	-0.0193617	0.9397	0.970389	-0.50695	0.05015	0.135527	-0.184355	0.4474	0.637258	-0.591468	0.02725	0.0841493	-0.484785	0.05755	0.15059	0.322595	0.2077	0.385341	-0.0845181	0.7563	0.865847	0.0221642	0.91715	0.958763
MAC_00781	Phosphatidyl synthase	17.3221	1.71218	9.50932	2.01508	7.88454	2.00934	9.77135	1.55159	6.11467	1.15159	4.91299	0.261658	-0.865201	5e-05	0.000362775	-1.13552	5e-05	0.000362775	-0.825985	5e-05	0.000362775	-1.50227	5e-05	0.000362775	-1.81794	5e-05	0.000362775	-0.270316	0.16045	0.321383	0.0392161	0.83005	0.909552	-0.637068	0.00075	0.00413583	-0.95274	5e-05	0.000362775	0.309532	0.10645	0.238762	-0.366752	0.0673	0.169601	-0.682424	0.0011	0.00576616
MAC_00782	Uncharacterized protein	5.06934	0.310453	5.85975	0.807205	6.24918	0.334687	6.71743	0.219711	6.3529	1.19327	7.15476	0.710858	0.209042	0.3059	0.499205	0.30187	0.13375	0.28204	0.406113	0.04275	0.119874	0.325618	0.1062	0.238326	0.497107	0.01355	0.0477906	0.0928274	0.63935	0.787747	0.197071	0.3201	0.514617	0.116575	0.5555	0.726204	0.288065	0.1429	0.295658	0.104243	0.60095	0.759976	0.0237478	0.89925	0.949237	0.195238	0.31455	0.508506
MAC_00783	Uncharacterized protein	15.3923	0.835105	14.5826	0.590348	13.8041	1.74062	16.4363	0.363384	15.7154	1.71919	15.4888	0.359897	-0.0779607	0.6449	0.791802	-0.15711	0.362	0.556788	0.0946803	0.57475	0.740685	0.0299667	0.86095	0.9277	0.00901227	0.95445	0.977529	-0.0791495	0.64605	0.792604	0.172641	0.31465	0.508582	0.107927	0.52925	0.705661	0.086973	0.6115	0.767863	0.25179	0.1397	0.290938	0.187077	0.2779	0.468547	0.166122	0.32905	0.524117
MAC_00784	Cytochrome c oxidase subunit 7A	1369.19	60.1189	1466.98	111.992	1352.77	150.63	1229.85	50.0976	1155.92	144.504	1216.32	145.593	0.099526	0.4535	0.642834	-0.0174043	0.8979	0.948432	-0.154841	0.2467	0.433169	-0.244282	0.06625	0.167651	-0.170797	0.19685	0.371222	-0.11693	0.3684	0.5634	-0.254367	0.05345	0.142331	-0.343808	0.01045	0.0387066	-0.270323	0.04125	0.116556	-0.137437	0.3023	0.495448	-0.226878	0.09105	0.212701	-0.153393	0.2464	0.432837
MAC_00785	Mitochondrial large ribosomal subunit	364.804	7.83699	319.315	7.92563	289.974	14.1308	318.793	20.1346	337.262	9.00006	328.592	11.7117	-0.192139	0.12115	0.262065	-0.331196	0.00865	0.0331536	-0.194499	0.11855	0.258046	-0.113251	0.36275	0.557576	-0.150822	0.22585	0.408117	-0.139057	0.2591	0.447317	-0.00235986	0.98505	0.991969	0.0788882	0.52425	0.701595	0.0413175	0.74535	0.859025	0.136697	0.2657	0.454712	0.217945	0.07575	0.185359	0.180374	0.1423	0.294853
MAC_00786	Uncharacterized protein	116.452	3.80872	96.6858	24.8514	89.694	8.47428	105.791	13.3988	112.863	9.31939	117.783	8.78139	-0.268362	0.034	0.100271	-0.376654	0.0029	0.013262	-0.138521	0.26075	0.449355	-0.0451647	0.71775	0.841684	0.0163928	0.895	0.946727	-0.108292	0.39015	0.584797	0.129841	0.2992	0.492053	0.223197	0.076	0.185799	0.284755	0.02255	0.0722031	0.238133	0.0565	0.148407	0.331489	0.0082	0.0316924	0.393047	0.00145	0.0073241
MAC_00787	Ankyrin repeat domain containing protein	9.46837	1.63389	13.4852	2.05633	18.1318	3.05546	16.2683	2.66858	10.7803	0.331813	11.8328	1.52596	0.510186	0.0002	0.00128619	0.937332	5e-05	0.000362775	0.780872	5e-05	0.000362775	0.187209	0.19035	0.362452	0.321607	0.0236	0.0749805	0.427146	0.0016	0.00797782	0.270686	0.0469	0.128655	-0.322976	0.0214	0.069228	-0.188579	0.17565	0.342436	-0.156461	0.2319	0.415615	-0.750123	5e-05	0.000362775	-0.615726	5e-05	0.000362775
MAC_00788	Pre-mRNA splicing factor (Prp24), putative	31.4547	0.798352	38.9279	2.00151	34.1385	1.08292	34.151	2.57049	35.8335	1.94992	32.844	1.81995	0.307527	0.01165	0.0422559	0.118122	0.33705	0.532423	0.118651	0.33245	0.527783	0.18803	0.12875	0.274308	0.0623545	0.61805	0.772386	-0.189405	0.1196	0.259687	-0.188876	0.12325	0.265527	-0.119498	0.3315	0.526826	-0.245173	0.04665	0.128139	0.000529318	0.99805	0.998411	0.0699078	0.5697	0.736925	-0.0557675	0.65475	0.798992
MAC_00789	ATP dependent RNA helicase, putative	23.3934	2.23494	24.0883	3.22518	31.6468	2.31445	23.2507	2.00312	20.3951	1.6976	23.9427	3.62019	0.0422341	0.73645	0.853335	0.435959	0.0005	0.0029	-0.00882342	0.9416	0.971388	-0.197875	0.1087	0.242445	0.0334877	0.78895	0.885459	0.393725	0.00145	0.0073241	-0.0510576	0.6794	0.815824	-0.240109	0.05265	0.140673	-0.00874642	0.94635	0.973689	-0.444782	0.0002	0.00128619	-0.633834	5e-05	0.000362775	-0.402471	0.0008	0.00436954
MAC_00790	Ribosomal protein L19	351.464	10.6589	323.1	16.5382	278.383	27.1337	287.598	15.3223	288.35	8.94422	330.606	35.9008	-0.121399	0.61395	0.769642	-0.336309	0.15125	0.307886	-0.289327	0.21575	0.395762	-0.28556	0.2236	0.405417	-0.0882675	0.7158	0.840284	-0.21491	0.34745	0.542904	-0.167928	0.46245	0.650592	-0.164161	0.4741	0.660833	0.0331313	0.88815	0.942967	0.0469815	0.83685	0.913448	0.0507489	0.82195	0.905116	0.248041	0.28355	0.474812
MAC_00791	Serine hydroxymethyltransferase	255.265	20.8817	277.675	49.9961	240.698	14.4648	192.653	10.9358	184.66	8.74854	174.436	9.22797	0.121404	0.3434	0.539067	-0.08477	0.50145	0.683386	-0.405988	0.00115	0.00599744	-0.467124	0.00025	0.00157207	-0.549293	5e-05	0.000362775	-0.206174	0.1032	0.23337	-0.527391	5e-05	0.000362775	-0.588528	5e-05	0.000362775	-0.670696	5e-05	0.000362775	-0.321218	0.01115	0.0408255	-0.382354	0.0028	0.0128752	-0.464523	0.0004	0.00238366
MAC_00792	Isochorismatase	12.4438	0.868231	16.2402	1.20985	17.7213	0.792675	16.4936	1.1088	16.699	0.986793	16.1382	0.687508	0.384144	0.0071	0.0281806	0.51006	0.0002	0.00128619	0.406486	0.0045	0.0192068	0.424343	0.0033	0.0147896	0.375058	0.00735	0.0289962	0.125916	0.34945	0.54488	0.0223416	0.869	0.932172	0.0401984	0.7676	0.872626	-0.00908644	0.94615	0.973596	-0.103574	0.44445	0.634479	-0.0857171	0.52795	0.704758	-0.135002	0.32185	0.516483
MAC_00793	Bromodomain associated protein	100.725	7.65977	99.0137	5.95135	81.5187	5.32392	91.9242	4.10727	89.2701	0.258468	95.4528	0.256601	-0.0247198	0.83695	0.913526	-0.305217	0.01435	0.0500996	-0.131903	0.288	0.479803	-0.174171	0.1648	0.327455	-0.0775611	0.5319	0.707716	-0.280497	0.02465	0.077672	-0.107183	0.38955	0.584116	-0.149451	0.2362	0.42068	-0.0528413	0.6718	0.810546	0.173314	0.16825	0.332331	0.131046	0.3053	0.498579	0.227655	0.07045	0.175521
MAC_00794	G-protein beta subunit	1846.92	111.845	1699.2	178.684	1403.69	222.55	1490.43	99.5439	1430.25	106.926	1706.43	228.311	-0.120266	0.4669	0.654595	-0.395902	0.01615	0.0552113	-0.309388	0.0579	0.151299	-0.368859	0.02365	0.0750952	-0.114139	0.4975	0.68029	-0.275636	0.0901	0.211116	-0.189122	0.2433	0.429167	-0.248592	0.12305	0.265193	0.00612782	0.9701	0.984884	0.0865139	0.5867	0.749472	0.0270431	0.8658	0.930383	0.281763	0.0831	0.198848
MAC_00795	Oligosaccharyl transferase subunit	48.7203	2.63655	51.751	5.00774	43.559	3.61774	40.619	0.924638	47.8683	0.796057	44.6258	2.08087	0.0870642	0.4719	0.658925	-0.161554	0.1801	0.3486	-0.26237	0.0318	0.0951149	-0.0254531	0.83595	0.912947	-0.126647	0.29145	0.483499	-0.248618	0.0399	0.113597	-0.349435	0.0045	0.0192068	-0.112517	0.3459	0.54142	-0.213711	0.0754	0.18471	-0.100816	0.4049	0.598813	0.136101	0.2566	0.444468	0.0349074	0.78045	0.88031
MAC_00796	Rossmann-fold NAD(P)(+)-binding protein	35.8852	3.10802	53.8351	3.86262	62.7025	3.95846	66.3656	2.59943	52.6209	1.99921	55.3469	0.869533	0.585157	5e-05	0.000362775	0.805132	5e-05	0.000362775	0.887045	5e-05	0.000362775	0.552245	5e-05	0.000362775	0.625113	5e-05	0.000362775	0.219974	0.07645	0.18669	0.301887	0.0161	0.0550827	-0.032912	0.79205	0.887593	0.0399554	0.74825	0.86075	0.081913	0.50465	0.685951	-0.252886	0.0407	0.115316	-0.180019	0.14405	0.297266
MAC_00797	Cell division protein ftsj, putative	43.2558	4.11727	43.8931	2.05485	42.4062	2.83262	43.503	2.34808	53.0072	1.80323	44.4208	1.84734	0.0211026	0.88635	0.942069	-0.0286173	0.8443	0.917973	0.00822441	0.95895	0.979759	0.293297	0.0382	0.109853	0.0383429	0.79135	0.887064	-0.0497199	0.7326	0.850855	-0.0128782	0.92885	0.964729	0.272195	0.05565	0.14667	0.0172403	0.90705	0.953371	0.0368417	0.8026	0.893558	0.321915	0.02225	0.0714318	0.0669602	0.6456	0.792325
MAC_00798	60S ribosomal protein L18	4846.62	163.136	4397.29	304.091	3719.19	240.102	3862.26	171.568	3800.19	165.505	4344.23	621.093	-0.140366	0.46505	0.65298	-0.381991	0.04165	0.11747	-0.327534	0.077	0.18775	-0.350909	0.0608	0.157128	-0.157879	0.4162	0.60909	-0.241626	0.1917	0.364265	-0.187168	0.30725	0.500627	-0.210543	0.257	0.444982	-0.0175129	0.9273	0.963859	0.0544577	0.7516	0.86284	0.0310827	0.85205	0.922522	0.224113	0.2239	0.405777
MAC_00799	Mitochondrial carrier protein, putative	81.4909	6.07344	81.8623	3.44032	60.1617	4.28925	64.496	5.4323	62.3853	3.69612	70.0668	7.2473	0.00656095	0.95625	0.978391	-0.437794	0.00085	0.00460684	-0.337429	0.00855	0.0328239	-0.385432	0.0024	0.01129	-0.217907	0.08505	0.202269	-0.444355	0.0008	0.00436954	-0.34399	0.00715	0.028342	-0.391993	0.00225	0.0106898	-0.224468	0.0756	0.185076	0.100365	0.436	0.627042	0.0523618	0.68705	0.821136	0.219886	0.08645	0.204754
MAC_00800	Pre-mRNA splicing factor (Srp1), putative	273.247	6.53362	266.308	25.2296	228.689	1.72484	259.646	3.95405	260.819	3.0589	257.673	35.494	-0.0371111	0.7618	0.869193	-0.256815	0.0352	0.103021	-0.0736606	0.54665	0.719357	-0.0671547	0.584	0.747481	-0.0846611	0.489	0.673172	-0.219704	0.07275	0.179786	-0.0365495	0.7608	0.868641	-0.0300436	0.80225	0.893376	-0.04755	0.69575	0.826864	0.183154	0.12955	0.275588	0.18966	0.12005	0.260373	0.172154	0.1595	0.319964
MAC_00801	O-acyltransferase	12.4248	0.349997	11.1906	1.87151	14.0786	0.493177	10.9014	2.14145	11.2833	1.99914	11.6497	1.57312	-0.150937	0.33975	0.535295	0.180276	0.2389	0.423754	-0.188714	0.2314	0.414982	-0.139039	0.3726	0.567619	-0.0929354	0.54855	0.72092	0.331212	0.03795	0.109288	-0.0377776	0.8128	0.899962	0.0118975	0.9382	0.969633	0.0580013	0.71255	0.838145	-0.36899	0.01865	0.0620051	-0.319315	0.0411	0.116206	-0.273211	0.07805	0.189682
MAC_00802	Fimbrin	230.295	13.4719	237.766	7.79882	228.658	5.01822	162.941	13.2062	140.603	3.59539	160.734	6.21954	0.0460587	0.7255	0.846575	-0.0102939	0.93835	0.969708	-0.499131	0.00015	0.000993023	-0.711861	5e-05	0.000362775	-0.518812	5e-05	0.000362775	-0.0563526	0.67135	0.810286	-0.54519	5e-05	0.000362775	-0.757919	5e-05	0.000362775	-0.56487	5e-05	0.000362775	-0.488837	0.0002	0.00128619	-0.701567	5e-05	0.000362775	-0.508518	0.0001	0.000686749
MAC_00803	Uncharacterized protein	66.1533	3.82711	64.4131	1.52567	72.9789	6.37563	71.7386	7.9558	63.9712	1.42799	65.6651	2.14114	-0.0384601	0.7574	0.866492	0.141665	0.251	0.438067	0.116936	0.34265	0.538338	-0.0483909	0.6962	0.827185	-0.0106867	0.9294	0.964882	0.180125	0.1481	0.303235	0.155396	0.20955	0.387721	-0.00993078	0.936	0.968518	0.0277734	0.8257	0.907102	-0.0247296	0.8379	0.914065	-0.190056	0.12595	0.269826	-0.152352	0.21875	0.399499
MAC_00804	Ribosomal protein L24E	182.089	14.8446	112.941	16.0916	135.557	6.79239	172.516	2.14048	185.29	8.69882	175.158	7.27512	-0.689068	5e-05	0.000362775	-0.425745	0.0009	0.00484136	-0.0779132	0.53705	0.711661	0.0251429	0.8394	0.914948	-0.0559793	0.6525	0.797388	0.263322	0.03095	0.0930759	0.611154	5e-05	0.000362775	0.71421	5e-05	0.000362775	0.633088	5e-05	0.000362775	0.347832	0.0041	0.0177504	0.450888	0.00025	0.00157207	0.369766	0.0025	0.011687
MAC_00805	Uncharacterized protein	16.6098	0.926422	15.2791	1.2993	11.9607	0.351873	14.9851	0.675709	14.1613	3.05074	14.0712	1.20663	-0.120478	0.41005	0.603453	-0.473729	0.0019	0.00925559	-0.148503	0.3055	0.498775	-0.230084	0.1228	0.264805	-0.239289	0.10675	0.239245	-0.353252	0.01945	0.0640929	-0.028025	0.84645	0.919347	-0.109607	0.45685	0.64578	-0.118811	0.4188	0.611428	0.325227	0.03045	0.0918965	0.243645	0.10945	0.243655	0.234441	0.1229	0.264938
MAC_00806	Phosphotransferase enzyme family protein	5.88147	2.45455	8.66426	1.96319	10.627	1.82521	9.0274	0.47236	8.59424	0.956039	8.72626	1.40691	0.558899	0.0366	0.106224	0.853491	0.00165	0.008192	0.618133	0.0207	0.0674387	0.547192	0.0405	0.114864	0.569186	0.033	0.0979367	0.294592	0.20245	0.378598	0.0592341	0.79945	0.891702	-0.0117068	0.9754	0.987164	0.0102874	0.9759	0.987341	-0.235358	0.31455	0.508506	-0.306299	0.19245	0.365266	-0.284305	0.226	0.408323
MAC_00807	Casein kinase I isoform epsilon	412.515	14.4836	444.134	28.5446	355.746	21.8803	323.761	6.24129	335.363	24.043	319.157	34.5747	0.10655	0.41585	0.608771	-0.213597	0.09595	0.2212	-0.349514	0.00595	0.0243157	-0.29872	0.02095	0.0680838	-0.370177	0.0039	0.0170189	-0.320148	0.01355	0.0477906	-0.456065	0.0002	0.00128619	-0.40527	0.00245	0.0114878	-0.476727	0.0003	0.00184856	-0.135917	0.2841	0.475521	-0.0851226	0.50395	0.685434	-0.15658	0.21905	0.399829
MAC_00808	Inositol 5-phosphatase, putative	44.5599	5.63844	40.5384	5.17868	25.4951	0.418219	19.25	0.804697	19.0793	0.548976	19.259	2.55092	-0.136456	0.29125	0.483315	-0.80553	5e-05	0.000362775	-1.21089	5e-05	0.000362775	-1.22374	5e-05	0.000362775	-1.21022	5e-05	0.000362775	-0.669074	5e-05	0.000362775	-1.07443	5e-05	0.000362775	-1.08728	5e-05	0.000362775	-1.07376	5e-05	0.000362775	-0.405357	0.004	0.0173919	-0.418211	0.0029	0.013262	-0.404686	0.0029	0.013262
MAC_00809	Serine/threonine-protein kinase PRKX	62.8932	8.30352	61.1783	13.6759	39.5861	3.45856	34.7804	3.02883	26.3864	0.752856	30.4667	1.68532	-0.0398845	0.76305	0.869901	-0.667912	5e-05	0.000362775	-0.854629	5e-05	0.000362775	-1.25311	5e-05	0.000362775	-1.04567	5e-05	0.000362775	-0.628027	5e-05	0.000362775	-0.814745	5e-05	0.000362775	-1.21323	5e-05	0.000362775	-1.00579	5e-05	0.000362775	-0.186718	0.1723	0.337848	-0.5852	0.0001	0.000686749	-0.37776	0.0063	0.0255056
MAC_00810	GTPase activating protein (Gyp2)	33.5938	1.04034	36.1299	2.51187	33.1251	1.25811	26.2604	1.77415	28.9513	1.23565	27.2783	2.33743	0.104996	0.39335	0.587894	-0.0202739	0.866	0.930518	-0.355309	0.00365	0.0161019	-0.214567	0.07965	0.192607	-0.300444	0.0145	0.0505241	-0.12527	0.30335	0.496561	-0.460306	0.00015	0.000993023	-0.319563	0.00765	0.0299612	-0.40544	0.0008	0.00436954	-0.335035	0.00705	0.0280143	-0.194293	0.10705	0.239754	-0.28017	0.02415	0.0764157
MAC_00811	NUDIX domain-containing protein	5.35417	0.762043	5.63772	1.45832	8.96801	2.39648	9.87805	1.86493	9.81443	4.57184	7.39101	2.16153	0.0744478	0.7835	0.882342	0.744124	0.0048	0.0202711	0.883563	0.00085	0.00460684	0.87424	0.00105	0.00553695	0.465108	0.0793	0.192003	0.669676	0.0091	0.0345759	0.809116	0.00165	0.008192	0.799793	0.0022	0.0104899	0.39066	0.1339	0.282255	0.13944	0.5449	0.717943	0.130117	0.5715	0.738294	-0.279016	0.2493	0.436048
MAC_00812	Oxidoreductase, short chain dehydrogenase/reductase family	78.2442	2.83292	76.1303	7.8465	74.7673	2.69037	71.9678	4.16355	66.4856	0.343835	60.2589	3.91464	-0.039513	0.75865	0.867308	-0.0655765	0.6135	0.769288	-0.120632	0.35315	0.548539	-0.234942	0.0747	0.183388	-0.376809	0.00395	0.0172033	-0.0260634	0.8382	0.914272	-0.0811194	0.53125	0.707282	-0.195429	0.13575	0.284881	-0.337296	0.01045	0.0387066	-0.0550559	0.667	0.807417	-0.169366	0.19535	0.369204	-0.311233	0.01865	0.0620051
MAC_00813	Pal1 cell morphology protein	36.5107	1.87719	32.3447	2.4062	32.0255	2.04576	34.6651	1.98019	38.2793	0.815222	38.7586	0.97229	-0.174788	0.18245	0.351709	-0.189096	0.15135	0.308009	-0.074836	0.56925	0.736626	0.0682467	0.5979	0.757798	0.0861985	0.5059	0.6869	-0.0143076	0.9123	0.956151	0.0999522	0.45115	0.640743	0.243035	0.0657	0.166612	0.260987	0.047	0.128864	0.11426	0.3862	0.58073	0.257343	0.05125	0.137785	0.275294	0.03645	0.105888
MAC_00814	Uncharacterized protein	11.7326	0.849815	12.8605	1.89495	12.8044	0.484456	14.1899	1.79412	13.1238	1.38628	12.0216	2.24616	0.132428	0.4577	0.646512	0.126124	0.47855	0.664505	0.274347	0.1219	0.263293	0.161669	0.3706	0.565625	0.0351134	0.8485	0.920529	-0.00630346	0.9656	0.982684	0.141919	0.41715	0.609913	0.0292418	0.86505	0.929963	-0.0973143	0.5854	0.748496	0.148223	0.3952	0.589548	0.0355452	0.8402	0.915387	-0.0910108	0.61305	0.769049
MAC_00815	Rho guanyl nucleotide exchange factor (Rom2), putative	55.7288	1.74948	53.2581	3.31718	52.9054	0.970172	47.7383	1.88901	51.2284	2.56836	54.1795	3.29075	-0.0654246	0.5897	0.751669	-0.0750089	0.53755	0.712066	-0.223277	0.0677	0.170333	-0.12148	0.32275	0.51744	-0.0406764	0.7313	0.850027	-0.00958433	0.9377	0.969406	-0.157853	0.1914	0.363833	-0.0560556	0.6437	0.790945	0.0247482	0.8367	0.913341	-0.148268	0.21825	0.398913	-0.0464713	0.6985	0.828605	0.0343325	0.76985	0.873851
MAC_00816	V-type proton ATPase proteolipid subunit	154.308	4.01614	178.443	11.3199	162.128	15.5743	147.467	8.47412	136.469	5.98334	160.863	3.07461	0.209654	0.1071	0.239853	0.0713161	0.5917	0.753177	-0.0654178	0.6219	0.775258	-0.177236	0.1788	0.34679	0.0600232	0.65005	0.795566	-0.138338	0.28535	0.476876	-0.275072	0.0362	0.105324	-0.38689	0.0033	0.0147896	-0.149631	0.2462	0.432572	-0.136734	0.292	0.484134	-0.248552	0.0601	0.155682	-0.0112928	0.93175	0.966281
MAC_00817	Uncharacterized protein	39.6351	7.40393	38.799	2.54162	55.6487	3.6609	52.8624	4.32187	40.1594	7.32614	36.5174	3.53853	-0.0307575	0.84015	0.915356	0.48957	0.00125	0.00644361	0.415464	0.0062	0.0251556	0.0189613	0.90095	0.950169	-0.118191	0.4444	0.634451	0.520328	0.0006	0.00340137	0.446221	0.00305	0.0138366	0.0497188	0.7462	0.859535	-0.0874336	0.5704	0.737501	-0.0741065	0.60885	0.76588	-0.470609	0.0017	0.00840203	-0.607761	5e-05	0.000362775
MAC_00818	Nuclear protein Qri2/Nse4, putative	43.1026	4.10566	42.157	2.47175	61.7557	4.78324	64.3394	3.54718	67.4294	1.93994	55.1917	1.90753	-0.0320014	0.7999	0.891964	0.518799	0.0001	0.000686749	0.577929	5e-05	0.000362775	0.645605	5e-05	0.000362775	0.356678	0.0049	0.0206171	0.5508	5e-05	0.000362775	0.60993	5e-05	0.000362775	0.677606	5e-05	0.000362775	0.38868	0.00315	0.0142182	0.0591303	0.6355	0.785165	0.126806	0.3062	0.499518	-0.16212	0.1922	0.364964
MAC_00819	Uncharacterized protein	35.2593	3.5102	43.5108	9.18233	22.1745	1.68702	27.5012	4.58059	17.9729	2.77505	17.7974	2.23854	0.303368	0.0146	0.0508127	-0.669106	5e-05	0.000362775	-0.358512	0.00375	0.0164672	-0.972184	5e-05	0.000362775	-0.986339	5e-05	0.000362775	-0.972474	5e-05	0.000362775	-0.66188	5e-05	0.000362775	-1.27555	5e-05	0.000362775	-1.28971	5e-05	0.000362775	0.310594	0.0132	0.0467669	-0.303077	0.01785	0.0598522	-0.317233	0.01385	0.048657
MAC_00820	Phosphoinositide 3-kinase	24.2892	1.91665	25.4307	1.18543	25.0679	2.231	21.0524	0.99005	20.9901	0.246613	19.4639	0.610302	0.0662529	0.59095	0.752568	0.0455267	0.71455	0.839529	-0.206328	0.1042	0.235037	-0.210608	0.09475	0.219164	-0.319518	0.0115	0.0418227	-0.0207261	0.8664	0.930755	-0.272581	0.0305	0.0920005	-0.276861	0.02765	0.0851457	-0.385771	0.0021	0.0100834	-0.251855	0.04465	0.123845	-0.256135	0.03975	0.113264	-0.365045	0.0036	0.0159129
MAC_00821	Ran exchange factor Prp20/Pim1, putative	2.93898	0.126827	4.46532	1.21171	4.26931	0.507743	3.64888	0.354495	3.72784	0.794397	4.72449	0.346269	0.603446	0.00645	0.0260063	0.538685	0.01375	0.0483644	0.312135	0.16265	0.324546	0.343024	0.1267	0.271059	0.68484	0.00195	0.00946249	-0.0647608	0.75035	0.861969	-0.291311	0.1651	0.3279	-0.260422	0.2137	0.393138	0.0813937	0.68875	0.822259	-0.22655	0.28055	0.47159	-0.195661	0.3512	0.546649	0.146155	0.467	0.654647
MAC_00822	Serine/threonine-protein kinase	13.9567	1.89017	11.5903	1.02833	19.062	2.54756	22.9083	0.442309	17.1799	1.51196	20.1733	1.55627	-0.268043	0.14185	0.294155	0.44974	0.00965	0.0362615	0.714911	5e-05	0.000362775	0.299758	0.0822	0.197221	0.531486	0.00205	0.00987573	0.717783	0.0001	0.000686749	0.982954	5e-05	0.000362775	0.567801	0.00125	0.00644361	0.799529	5e-05	0.000362775	0.265171	0.0956	0.220614	-0.149982	0.3632	0.558095	0.0817463	0.60385	0.76221
MAC_00823	Uncharacterized protein	97.8769	7.60155	89.4895	4.13517	89.2394	2.0487	72.6899	3.31418	66.6155	1.25791	70.5278	1.05154	-0.12925	0.29685	0.489527	-0.133287	0.2786	0.469289	-0.429214	0.0004	0.00238366	-0.555111	5e-05	0.000362775	-0.472776	0.00025	0.00157207	-0.00403742	0.97455	0.986689	-0.299964	0.01485	0.0515329	-0.425861	0.00085	0.00460684	-0.343526	0.00575	0.0236357	-0.295927	0.0161	0.0550827	-0.421824	0.0007	0.00389376	-0.339489	0.007	0.0278556
MAC_00824	Uncharacterized protein	41.03	2.03833	35.0245	2.00949	44.7684	5.03147	43.1679	2.64482	41.2024	2.64882	46.1163	3.87516	-0.228312	0.16225	0.324003	0.125802	0.42835	0.620233	0.0732794	0.64745	0.793742	0.00604948	0.9737	0.986375	0.168599	0.27935	0.47017	0.354114	0.02805	0.0861281	0.301592	0.0617	0.158946	0.234362	0.1499	0.305899	0.396911	0.0133	0.0470409	-0.0525225	0.7367	0.853482	-0.119752	0.45355	0.642883	0.0427972	0.77985	0.879928
MAC_00825	Anion exchange protein, putative	4.72967	0.255787	4.34928	0.670349	5.37893	1.74164	3.83489	1.08564	3.89556	0.98663	3.85402	0.603371	-0.120963	0.63655	0.785853	0.185581	0.4458	0.635735	-0.302551	0.24005	0.425115	-0.279907	0.28005	0.470979	-0.295376	0.25375	0.441264	0.306543	0.2221	0.403626	-0.181588	0.488	0.672323	-0.158945	0.5471	0.719759	-0.174413	0.50495	0.686224	-0.488132	0.0536	0.142623	-0.465488	0.0689	0.172595	-0.480957	0.05795	0.151411
MAC_00826	Uncharacterized protein	45.3043	1.36587	48.4971	9.81132	38.4076	1.25996	44.3953	6.74803	42.2503	2.84366	47.4328	10.275	0.0982483	0.4672	0.65475	-0.238258	0.08395	0.200339	-0.0292439	0.82755	0.908197	-0.100689	0.4607	0.649055	0.0662345	0.62445	0.776974	-0.336507	0.0151	0.0522388	-0.127492	0.3474	0.542846	-0.198937	0.142	0.294398	-0.0320138	0.8129	0.900017	0.209014	0.13175	0.279061	0.137569	0.3204	0.514947	0.304493	0.0277	0.0852701
MAC_00827	Transcriptional regulator (Cti6), putative	47.2502	2.48567	37.9249	5.78075	34.4099	1.56601	32.1629	2.93647	36.1015	1.01392	34.9852	2.73736	-0.317175	0.01075	0.0396209	-0.457494	0.0002	0.00128619	-0.554924	5e-05	0.000362775	-0.388261	0.0014	0.00710529	-0.433574	0.00035	0.00212064	-0.140319	0.26715	0.456421	-0.237749	0.06585	0.166883	-0.0710855	0.5669	0.73467	-0.116399	0.3535	0.548815	-0.0974293	0.4444	0.634451	0.0692338	0.57685	0.742285	0.0239199	0.8509	0.921903
MAC_00828	Uncharacterized protein	66.0208	4.17853	56.1081	0.39669	49.4265	3.52288	46.4973	3.49706	46.6744	2.16262	52.0363	4.2474	-0.234713	0.05585	0.14706	-0.417638	0.00105	0.00553695	-0.505774	0.0001	0.000686749	-0.500289	5e-05	0.000362775	-0.343402	0.00585	0.0239684	-0.182924	0.146	0.300264	-0.271061	0.03045	0.0918965	-0.265575	0.0338	0.0998111	-0.108689	0.3792	0.573859	-0.0881364	0.4826	0.668034	-0.0826507	0.50875	0.689168	0.0742355	0.5512	0.722982
MAC_00829	Uncharacterized protein	53.397	0.862846	28.7068	4.11591	27.9234	0.955244	23.609	1.53751	22.6131	1.54622	23.4385	1.74986	-0.895365	5e-05	0.000362775	-0.935286	5e-05	0.000362775	-1.17743	5e-05	0.000362775	-1.2396	5e-05	0.000362775	-1.18788	5e-05	0.000362775	-0.0399208	0.7475	0.860347	-0.28206	0.0209	0.0679604	-0.344237	0.0051	0.0213209	-0.292512	0.01635	0.0557327	-0.242139	0.04685	0.128552	-0.304316	0.0141	0.0494042	-0.252591	0.0399	0.113597
MAC_00830	Uncharacterized protein	38.03	4.05161	36.8834	6.29281	25.382	1.69159	32.8082	0.642866	29.52	3.81006	29.2453	1.65815	-0.044164	0.73775	0.854086	-0.583329	0.0001	0.000686749	-0.213082	0.10915	0.24317	-0.365443	0.00785	0.0305982	-0.378933	0.0054	0.0223998	-0.539165	0.0001	0.000686749	-0.168918	0.20265	0.378881	-0.321279	0.01695	0.0573834	-0.334769	0.01325	0.046904	0.370247	0.00695	0.0277009	0.217885	0.1152	0.252851	0.204396	0.1364	0.285903
MAC_00831	D-arabinitol dehydrogenase ArbD, putative	17.4031	2.73333	21.2669	10.2532	62.9894	14.3872	41.3565	2.04449	31.7005	1.40226	31.4401	2.85724	0.289261	0.07805	0.189682	1.85576	5e-05	0.000362775	1.24877	5e-05	0.000362775	0.86516	5e-05	0.000362775	0.853257	5e-05	0.000362775	1.5665	5e-05	0.000362775	0.959507	5e-05	0.000362775	0.575899	0.00015	0.000993023	0.563996	0.0002	0.00128619	-0.606994	5e-05	0.000362775	-0.990603	5e-05	0.000362775	-1.00251	5e-05	0.000362775
MAC_00832	Isovaleryl-CoA dehydrogenase	305.673	47.598	297.446	79.0007	236.376	49.3657	192.349	19.7267	158.763	14.4102	229.943	60.3279	-0.0393617	0.75995	0.868149	-0.370906	0.0037	0.0162849	-0.668265	5e-05	0.000362775	-0.945117	5e-05	0.000362775	-0.410715	0.0011	0.00576616	-0.331544	0.00845	0.0324881	-0.628903	5e-05	0.000362775	-0.905755	5e-05	0.000362775	-0.371353	0.00315	0.0142182	-0.297359	0.01685	0.057093	-0.574211	5e-05	0.000362775	-0.0398091	0.75625	0.865813
MAC_00833	Methylcrotonoyl-CoA carboxylase beta chain	210.769	39.0834	220.059	63.2166	193.534	36.192	146.696	7.40988	115.24	15.1861	182.683	48.2666	0.0622273	0.63305	0.783405	-0.123072	0.33995	0.535515	-0.522833	5e-05	0.000362775	-0.871021	5e-05	0.000362775	-0.20632	0.11085	0.245888	-0.185299	0.15365	0.311457	-0.58506	5e-05	0.000362775	-0.933249	5e-05	0.000362775	-0.268548	0.038	0.109405	-0.399761	0.00145	0.0073241	-0.74795	5e-05	0.000362775	-0.0832485	0.5132	0.692813
MAC_00834	Uncharacterized protein	25.1967	1.51928	19.0573	3.82351	23.2913	3.14825	26.8309	2.32287	26.2177	1.29474	25.1512	0.303933	-0.402889	0.0029	0.013262	-0.113442	0.37975	0.574405	0.0906591	0.4749	0.661585	0.0573078	0.6518	0.796861	-0.00261081	0.98525	0.992114	0.289446	0.02975	0.0902875	0.493548	0.00025	0.00157207	0.460196	0.00045	0.00264476	0.400278	0.0023	0.0108941	0.204102	0.11065	0.245584	0.17075	0.18215	0.351273	0.110832	0.38815	0.582705
MAC_00835	Uncharacterized protein	0.582011	0.125224	0.827964	0.270788	0.846459	0.073415	0.707311	0.492364	0.291509	0.143487	0.948126	0.8076	0.508521	1	1	0.540393	1	1	0.281299	1	1	-0.997507	1	1	0.704032	1	1	0.0318719	1	1	-0.227222	1	1	-1.50603	1	1	0.195511	1	1	-0.259094	1	1	-1.5379	1	1	0.163639	1	1
MAC_00836	Putative serine/threonine phosphatase 2C ptc2	0.771462	1.33621	0	0	0.301148	0.261162	0.170368	0.295085	0.362372	0.627649	0.578765	0.62127	#NAME?	1	1	-1.35712	1	1	-2.17894	1	1	-1.09012	1	1	-0.414617	1	1	inf	1	1	inf	1	1	inf	1	1	inf	1	1	-0.821823	1	1	0.266998	1	1	0.942503	1	1
MAC_00837	DUF718 domain protein	76.0635	7.2493	73.4929	3.87797	90.6298	5.93656	79.6633	14.8853	64.9545	12.2368	69.5796	7.20709	-0.0496003	0.7467	0.859768	0.252781	0.0948	0.219255	0.0667103	0.65685	0.800299	-0.227776	0.1462	0.300542	-0.12854	0.40965	0.603136	0.302381	0.04495	0.124486	0.116311	0.44475	0.634784	-0.178176	0.25285	0.440215	-0.0789398	0.61045	0.767079	-0.186071	0.21315	0.392462	-0.480557	0.00165	0.008192	-0.381321	0.0135	0.047644
MAC_00838	Uncharacterized protein	111.65	7.12568	137.476	11.0156	72.9431	6.90408	50.9088	4.67798	44.1269	2.14646	34.9172	5.27891	0.300195	0.0133	0.0470409	-0.614145	5e-05	0.000362775	-1.133	5e-05	0.000362775	-1.33926	5e-05	0.000362775	-1.67698	5e-05	0.000362775	-0.91434	5e-05	0.000362775	-1.4332	5e-05	0.000362775	-1.63945	5e-05	0.000362775	-1.97717	5e-05	0.000362775	-0.518857	0.0001	0.000686749	-0.725114	5e-05	0.000362775	-1.06283	5e-05	0.000362775
MAC_00839	Uncharacterized protein	65.4518	18.9048	79.3336	6.48279	57.3056	1.21896	40.9001	11.5507	10.1029	0.570088	6.14215	4.04509	0.277498	0.2645	0.453444	-0.191757	0.46845	0.655808	-0.67833	0.0198	0.0650172	-2.69566	0.0003	0.00184856	-3.41362	0.0057	0.0234643	-0.469255	0.0621	0.159702	-0.955828	0.00145	0.0073241	-2.97316	0.00015	0.000993023	-3.69112	0.00405	0.0175682	-0.486573	0.0885	0.208383	-2.5039	0.00045	0.00264476	-3.22186	0.00685	0.0273558
MAC_00840	LanC-like protein 1	4.85157	0.644943	4.81163	1.61335	4.40382	0.440179	8.16256	1.41558	5.28054	0.987584	4.90199	0.333707	-0.011927	0.9763	0.987569	-0.139695	0.58125	0.745618	0.75057	0.00185	0.00904247	0.122234	0.61835	0.772675	0.0149144	0.9674	0.983515	-0.127768	0.6177	0.772181	0.762497	0.0013	0.00666464	0.134161	0.58795	0.750353	0.0268414	0.92465	0.962472	0.890265	0.00035	0.00212064	0.261929	0.2979	0.490647	0.154609	0.5401	0.714159
MAC_00841	Uncharacterized protein	89.9987	2.53846	74.1256	12.8659	62.0485	7.25072	69.7986	6.1244	53.1752	4.18503	53.967	9.23566	-0.279933	0.03465	0.101722	-0.536508	0.0001	0.000686749	-0.366707	0.0054	0.0223998	-0.759151	5e-05	0.000362775	-0.737828	5e-05	0.000362775	-0.256576	0.0615	0.158542	-0.086775	0.5194	0.697806	-0.479218	0.0007	0.00389376	-0.457896	0.0012	0.00621755	0.169801	0.2185	0.399206	-0.222642	0.1162	0.254435	-0.20132	0.1564	0.315321
MAC_00842	Uncharacterized protein	22.0485	3.71929	19.8591	4.43106	30.9195	4.16402	37.9686	10.4862	38.3126	1.92063	34.3748	6.53999	-0.150879	0.3579	0.552942	0.487835	0.00245	0.0114878	0.784126	5e-05	0.000362775	0.797137	5e-05	0.000362775	0.640671	5e-05	0.000362775	0.638714	5e-05	0.000362775	0.935005	5e-05	0.000362775	0.948016	5e-05	0.000362775	0.79155	5e-05	0.000362775	0.296291	0.0442	0.122918	0.309302	0.03375	0.09968	0.152836	0.29535	0.487868
MAC_00843	Uncharacterized protein	79.4353	2.33428	81.6368	3.26236	89.6602	6.18829	94.298	2.94024	81.5951	2.84497	79.3349	2.71836	0.0394396	0.76145	0.869008	0.174688	0.1777	0.345302	0.247447	0.05535	0.146118	0.0387029	0.76675	0.872138	-0.00182336	0.99035	0.994426	0.135249	0.29145	0.483499	0.208008	0.1022	0.231765	-0.000736752	0.99675	0.997652	-0.041263	0.7513	0.862638	0.0727592	0.57105	0.738011	-0.135985	0.293	0.485262	-0.176512	0.1694	0.333935
MAC_00844	Pre-mRNA-splicing factor 38B	63.3939	5.93525	74.1849	8.32475	76.1199	4.69595	67.4058	4.18927	64.9859	1.95278	61.3654	4.83884	0.226781	0.06805	0.171	0.26393	0.03395	0.100154	0.0885289	0.4724	0.659365	0.0357826	0.7707	0.874409	-0.0469191	0.7065	0.833905	0.0371487	0.76255	0.869586	-0.138252	0.2626	0.45148	-0.190998	0.1242	0.267033	-0.2737	0.0277	0.0852701	-0.175401	0.1591	0.319373	-0.228147	0.06545	0.166137	-0.310849	0.01275	0.0454469
MAC_00845	C3HC4 type (RING finger) zinc finger containing protein	27.1418	1.96172	32.3362	7.64576	26.3323	1.03183	18.2738	0.556965	20.0278	1.23399	18.6029	4.30805	0.252636	0.04755	0.130026	-0.043681	0.73	0.849238	-0.570735	5e-05	0.000362775	-0.438508	0.00065	0.00364841	-0.544985	5e-05	0.000362775	-0.296317	0.0188	0.0623987	-0.82337	5e-05	0.000362775	-0.691144	5e-05	0.000362775	-0.797621	5e-05	0.000362775	-0.527054	5e-05	0.000362775	-0.394827	0.00265	0.0122799	-0.501304	0.0002	0.00128619
MAC_00846	Aspartate-semialdehyde dehydrogenase	100.355	4.01297	99.5273	11.6387	90.5532	1.11224	76.6731	1.21719	69.9555	8.48491	92.4251	12.3935	-0.0119514	0.92165	0.9609	-0.148278	0.2261	0.408432	-0.388323	0.0016	0.00797782	-0.520606	5e-05	0.000362775	-0.118759	0.33625	0.531591	-0.136327	0.26775	0.457101	-0.376371	0.0021	0.0100834	-0.508655	5e-05	0.000362775	-0.106808	0.38855	0.583087	-0.240044	0.0506	0.136465	-0.372328	0.0031	0.0140312	0.0295193	0.80895	0.89756
MAC_00847	Vacuolar membrane PQ loop repeat protein	19.4133	1.5413	25.1219	1.61797	16.6592	0.187006	16.2925	1.50976	13.7358	2.4308	14.6929	1.74146	0.3719	0.0321	0.0958164	-0.220725	0.22425	0.406199	-0.252832	0.17015	0.334962	-0.499104	0.0081	0.0313897	-0.401922	0.02945	0.0895671	-0.592625	0.00065	0.00364841	-0.624732	0.0005	0.0029	-0.871004	5e-05	0.000362775	-0.773822	5e-05	0.000362775	-0.0321072	0.86295	0.928732	-0.278379	0.13875	0.289473	-0.181197	0.3342	0.529629
MAC_00848	Putative nuclease S1	70.747	10.2977	60.2752	15.6246	64.8116	8.79793	71.0059	2.82754	75.2383	8.27269	72.716	7.56918	-0.231105	0.08285	0.198414	-0.126418	0.32735	0.522325	0.00527023	0.96615	0.982895	0.0887972	0.49045	0.674422	0.0396026	0.7595	0.867842	0.104687	0.4282	0.620138	0.236376	0.07365	0.181444	0.319902	0.0157	0.0539515	0.270708	0.03925	0.112181	0.131688	0.3099	0.503567	0.215215	0.0968	0.222668	0.16602	0.197	0.371437
MAC_00849	Uncharacterized protein	3.88967	1.45679	3.62116	0.968288	4.91379	0.823873	5.06312	1.05364	3.96079	1.0928	5.33323	2.4353	-0.103198	0.67245	0.811	0.337188	0.15535	0.313876	0.380376	0.10855	0.242185	0.0261396	0.92605	0.96322	0.455361	0.0547	0.14485	0.440385	0.06565	0.166529	0.483574	0.0407	0.115316	0.129337	0.59725	0.757298	0.558559	0.01895	0.0627794	0.0431887	0.84875	0.920672	-0.311048	0.1818	0.350804	0.118173	0.60085	0.759896
MAC_00850	Uncharacterized protein	15.3351	6.12469	11.3423	9.65992	8.26724	2.45324	13.8778	8.32383	13.0628	2.73552	8.85322	3.96344	-0.435117	0.3454	0.540971	-0.89136	0.11755	0.256507	-0.144056	0.74365	0.857931	-0.231376	0.6273	0.779056	-0.792562	0.1652	0.328046	-0.456242	0.42575	0.617827	0.291061	0.5349	0.710052	0.203741	0.69515	0.82653	-0.357445	0.54235	0.715909	0.747303	0.18525	0.355521	0.659984	0.2739	0.463947	0.0987976	0.89815	0.948599
MAC_00851	Uncharacterized protein	58.7489	0.406309	58.3551	6.83546	50.693	3.2964	46.8403	1.75305	46.7852	0.995454	48.0344	2.02985	-0.00970197	0.9368	0.968902	-0.212775	0.07675	0.187305	-0.326812	0.0082	0.0316924	-0.328509	0.00725	0.0286753	-0.290493	0.0159	0.0545244	-0.203073	0.0924	0.215124	-0.31711	0.0099	0.0370232	-0.318807	0.00955	0.0359531	-0.280791	0.02045	0.066764	-0.114037	0.34635	0.541838	-0.115734	0.3382	0.533711	-0.0777181	0.52125	0.699258
MAC_00852	Uncharacterized protein	53.9815	1.06446	57.2944	6.98379	44.6344	2.26706	57.259	5.60965	56.2643	5.10811	65.0794	5.09469	0.0859281	0.6353	0.78505	-0.274308	0.1547	0.312989	0.0850359	0.63765	0.786649	0.0597536	0.7425	0.857217	0.269737	0.13585	0.285038	-0.360236	0.0573	0.150097	-0.00089212	0.988	0.993164	-0.0261745	0.88905	0.943472	0.183809	0.30415	0.49736	0.359344	0.05855	0.152578	0.334062	0.07795	0.189498	0.544045	0.00345	0.0153442
MAC_00853	Pre-rRNA-processing protein ipi1	28.6696	0.621285	27.7232	1.15006	29.3325	7.12752	39.2745	1.40768	38.0889	4.39891	36.7179	4.1844	-0.0484262	0.769	0.873396	0.0329787	0.84575	0.918867	0.45407	0.00605	0.0246474	0.409849	0.01225	0.0440088	0.356962	0.0273	0.0842765	0.0814049	0.62565	0.777876	0.502497	0.0022	0.0104899	0.458275	0.00575	0.0236357	0.405388	0.0127	0.045305	0.421092	0.0098	0.0367176	0.376871	0.02235	0.0716918	0.323983	0.0475	0.129917
MAC_00854	DEAD/DEAH box RNA helicase	5.34287	0.51934	4.78274	0.0613242	5.76803	0.78155	6.63985	1.84652	7.40072	1.20822	7.4072	0.786112	-0.159778	0.4104	0.60369	0.110464	0.5643	0.73288	0.313535	0.09385	0.217637	0.47005	0.01125	0.041119	0.471313	0.01095	0.0402222	0.270242	0.15865	0.318691	0.473312	0.0117	0.0423964	0.629827	0.00075	0.00413583	0.63109	0.0008	0.00436954	0.203071	0.2711	0.460829	0.359585	0.05125	0.137785	0.360849	0.0502	0.135624
MAC_00855	Oxidoreductase (Msc7), putative	46.8206	1.75363	48.0508	1.19716	59.3531	2.152	52.3513	7.40251	54.9393	4.6711	54.8137	1.01025	0.0374186	0.76105	0.868815	0.342181	0.0055	0.0227569	0.161083	0.1924	0.365199	0.230697	0.0608	0.157128	0.227393	0.06365	0.16275	0.304763	0.01465	0.0509625	0.123665	0.3123	0.506178	0.193278	0.1107	0.245651	0.189975	0.1181	0.257332	-0.181098	0.137	0.286769	-0.111484	0.35925	0.554188	-0.114788	0.3463	0.541794
MAC_00856	Phospholipid-transporting ATPase	55.6827	3.90696	62.0824	13.4482	39.2735	0.888701	39.675	5.67145	41.771	2.00014	44.2561	3.75774	0.156956	0.20375	0.380218	-0.503672	5e-05	0.000362775	-0.488998	5e-05	0.000362775	-0.414726	0.0007	0.00389376	-0.331352	0.00555	0.0229348	-0.660629	5e-05	0.000362775	-0.645955	5e-05	0.000362775	-0.571682	5e-05	0.000362775	-0.488309	0.0001	0.000686749	0.0146744	0.901	0.950198	0.0889465	0.45625	0.645232	0.17232	0.15505	0.313483
MAC_00857	Uncharacterized protein	26.1939	0.610121	13.6666	2.35664	12.1589	1.80612	14.5333	1.3723	15.4844	0.077555	13.8229	1.37583	-0.938576	5e-05	0.000362775	-1.10721	5e-05	0.000362775	-0.849869	5e-05	0.000362775	-0.758418	5e-05	0.000362775	-0.922166	5e-05	0.000362775	-0.168639	0.2603	0.448791	0.0887073	0.5483	0.720736	0.180158	0.21505	0.394851	0.0164097	0.9108	0.955343	0.257346	0.09045	0.211717	0.348797	0.01775	0.0595747	0.185049	0.22475	0.406814
MAC_00858	Vacuolar ATP synthase subunit E	358.856	8.33765	339.794	2.4858	330.103	10.9685	345.232	15.1295	325.953	12.7006	315.411	11.8917	-0.0787458	0.5166	0.695592	-0.120488	0.3176	0.511841	-0.0558393	0.6433	0.790711	-0.138742	0.2464	0.432837	-0.186172	0.1215	0.262625	-0.0417423	0.7329	0.851013	0.0229065	0.85035	0.92154	-0.059996	0.62255	0.775641	-0.107426	0.37915	0.573825	0.0646487	0.5934	0.75443	-0.0182538	0.88215	0.939724	-0.065684	0.5872	0.749834
MAC_00859	DUF803 domain-containing protein	40.4231	0.925312	39.262	2.4356	38.8791	1.6111	42.32	1.82571	41.4622	1.22987	43.4787	2.70124	-0.0420473	0.74875	0.861045	-0.0561867	0.67165	0.810483	0.0661595	0.6113	0.76772	0.0366155	0.7777	0.878641	0.105131	0.4206	0.61307	-0.0141394	0.91535	0.957654	0.108207	0.4065	0.600295	0.0786628	0.54635	0.719077	0.147178	0.2574	0.445457	0.122346	0.35035	0.545784	0.0928022	0.4819	0.667392	0.161317	0.2196	0.400498
MAC_00860	Tetraspanin	15.4849	2.58527	9.40807	1.79745	27.6342	4.09926	43.1514	7.73024	31.1105	4.37881	27.6824	0.162617	-0.718893	0.00725	0.0286753	0.835592	0.00025	0.00157207	1.47855	5e-05	0.000362775	1.00654	0.0001	0.000686749	0.838106	0.0002	0.00128619	1.55448	5e-05	0.000362775	2.19744	5e-05	0.000362775	1.72543	5e-05	0.000362775	1.557	5e-05	0.000362775	0.642954	0.0005	0.0029	0.170946	0.3811	0.575726	0.00251454	0.9856	0.992282
MAC_00861	MADS box protein	202.402	1.27811	206.556	13.8136	288.864	6.88645	246.81	13.3074	269.976	7.21232	264.745	11.4131	0.0293135	0.81	0.89818	0.51317	5e-05	0.000362775	0.286181	0.0187	0.0621248	0.415608	0.00085	0.00460684	0.38738	0.00185	0.00904247	0.483856	0.0001	0.000686749	0.256867	0.0344	0.101146	0.386295	0.0016	0.00797782	0.358067	0.00315	0.0142182	-0.226989	0.05755	0.15059	-0.0975615	0.41955	0.612056	-0.125789	0.29545	0.487936
MAC_00862	Low affinity copper transporter	323.977	102.85	318.738	102.894	330.835	80.0083	403.134	181.658	449.021	117.107	408.211	147.126	-0.0235243	0.8526	0.922764	0.0302205	0.813	0.900103	0.315366	0.01445	0.0503908	0.470889	5e-05	0.000362775	0.333422	0.00915	0.0347319	0.0537449	0.6675	0.80777	0.33889	0.008	0.031069	0.494413	5e-05	0.000362775	0.356947	0.00495	0.0208001	0.285145	0.02565	0.0801693	0.440669	0.0004	0.00238366	0.303202	0.01735	0.0584751
MAC_00863	C2H2 finger domain protein, putative	18.7354	2.79436	39.3395	10.4349	92.2663	3.73797	69.776	5.31468	82.2777	9.81931	81.7017	3.40861	1.07021	5e-05	0.000362775	2.30003	5e-05	0.000362775	1.89696	5e-05	0.000362775	2.13473	5e-05	0.000362775	2.1246	5e-05	0.000362775	1.22983	5e-05	0.000362775	0.826753	5e-05	0.000362775	1.06452	5e-05	0.000362775	1.05439	5e-05	0.000362775	-0.403073	0.00125	0.00644361	-0.165303	0.17655	0.343701	-0.175438	0.15165	0.308458
MAC_00864	Malate synthase	200.18	15.2454	235.452	25.502	219.954	0.900991	151.397	5.28927	113.532	7.86801	132.071	6.61461	0.234135	0.06405	0.163507	0.135906	0.2792	0.470019	-0.402965	0.00165	0.008192	-0.8182	5e-05	0.000362775	-0.59998	5e-05	0.000362775	-0.0982292	0.4426	0.63284	-0.6371	5e-05	0.000362775	-1.05233	5e-05	0.000362775	-0.834115	5e-05	0.000362775	-0.538871	5e-05	0.000362775	-0.954105	5e-05	0.000362775	-0.735886	5e-05	0.000362775
MAC_00865	Serine/threonine-protein kinase GIN4	5.79374	0.773106	3.44721	0.287784	6.3507	1.05061	9.25953	1.03341	7.46994	0.526653	8.42088	1.67093	-0.749068	5e-05	0.000362775	0.132419	0.3927	0.587325	0.676443	5e-05	0.000362775	0.366601	0.01595	0.0546627	0.539474	0.00055	0.00315471	0.881487	5e-05	0.000362775	1.42551	5e-05	0.000362775	1.11567	5e-05	0.000362775	1.28854	5e-05	0.000362775	0.544023	0.00025	0.00157207	0.234182	0.11405	0.250968	0.407055	0.00645	0.0260063
MAC_00866	Uncharacterized protein	5.24321	1.22744	6.38334	1.30168	4.12375	0.378171	4.77961	1.67908	5.91781	3.61985	7.41339	2.65185	0.283861	0.51045	0.690554	-0.346492	0.51635	0.695353	-0.133556	0.789	0.885483	0.174614	0.6974	0.827979	0.499685	0.23445	0.418582	-0.630353	0.21455	0.394188	-0.417417	0.3716	0.56663	-0.109247	0.80135	0.892829	0.215824	0.58025	0.744765	0.212935	0.70515	0.833071	0.521105	0.3141	0.508083	0.846176	0.1025	0.232251
MAC_00867	Structural maintenance of chromosomes 5 smc5	37.7334	1.62464	29.2794	0.922679	43.7962	2.81682	43.1541	0.720617	48.2954	2.41226	43.3113	4.39055	-0.365956	0.00275	0.0126842	0.214962	0.07835	0.190207	0.193656	0.114	0.250903	0.356045	0.00345	0.0153442	0.198903	0.10355	0.233953	0.580918	5e-05	0.000362775	0.559611	5e-05	0.000362775	0.722001	5e-05	0.000362775	0.564858	5e-05	0.000362775	-0.0213069	0.85995	0.927195	0.141083	0.23965	0.424667	-0.0160598	0.89575	0.947149
MAC_00868	Cell polarity protein (Tea1), putative	25.4175	1.47509	20.2201	2.18592	23.7542	2.16262	30.1696	0.156994	30.4526	1.74381	27.7273	2.92092	-0.330032	0.00615	0.0249845	-0.09764	0.42855	0.620393	0.247273	0.0413	0.116662	0.26074	0.0324	0.0965429	0.125484	0.3071	0.500461	0.232392	0.06095	0.157434	0.577305	5e-05	0.000362775	0.590773	5e-05	0.000362775	0.455517	0.0004	0.00238366	0.344913	0.00515	0.0215076	0.35838	0.00405	0.0175682	0.223125	0.07145	0.177352
MAC_00869	TORC1 growth control complex subunit Kog1	18.7252	1.06971	24.5957	1.72252	25.5801	1.4377	21.7256	0.982455	24.2292	0.803748	22.2698	1.2242	0.39343	0.0012	0.00621755	0.450043	0.0002	0.00128619	0.214417	0.0825	0.197773	0.37177	0.0022	0.0104899	0.25011	0.04305	0.120506	0.0566125	0.64695	0.79334	-0.179013	0.1462	0.300542	-0.0216601	0.86025	0.927388	-0.143321	0.24715	0.433696	-0.235626	0.05385	0.143148	-0.0782727	0.5234	0.700925	-0.199933	0.10475	0.235897
MAC_00870	BZIP transcription factor (Fcr3)	42.4319	1.27577	74.3223	10.7571	51.5871	4.086	32.1568	0.773152	34.4612	0.706625	31.1351	1.16682	0.808644	5e-05	0.000362775	0.281859	0.03965	0.113043	-0.400025	0.0053	0.022046	-0.300177	0.03555	0.103789	-0.44661	0.0018	0.00883347	-0.526786	0.00015	0.000993023	-1.20867	5e-05	0.000362775	-1.10882	5e-05	0.000362775	-1.25525	5e-05	0.000362775	-0.681884	5e-05	0.000362775	-0.582036	0.0001	0.000686749	-0.728469	5e-05	0.000362775
MAC_00871	Ethanolaminephosphotransferase	169.444	5.62738	124.789	13.5085	128.935	18.0313	184.964	8.39332	176.104	7.74417	167.428	14.498	-0.441316	0.0001	0.000686749	-0.39416	0.0014	0.00710529	0.12644	0.2944	0.486861	0.0556247	0.64615	0.792656	-0.0172676	0.88185	0.939517	0.0471566	0.6926	0.824711	0.567756	5e-05	0.000362775	0.496941	0.0001	0.000686749	0.424049	0.00045	0.00264476	0.520599	5e-05	0.000362775	0.449784	0.00015	0.000993023	0.376892	0.00195	0.00946249
MAC_00872	RNA-dependent RNA polymerase	0.0259692	0.04498	0.0225605	0.0196214	0.0112419	0.0194716	0.0482768	0.0566255	0.0325129	0.00577797	0.0199696	0.0345883	-0.203002	1	1	-1.20791	1	1	0.894528	1	1	0.324207	1	1	-0.379001	1	1	-1.00491	1	1	1.09753	1	1	0.527209	1	1	-0.175999	1	1	2.10244	1	1	1.53212	1	1	0.828912	1	1
MAC_00873	Uncharacterized protein	9.2273	3.88371	7.56241	1.08955	11.8736	2.82606	13.9014	5.72856	22.4309	3.22507	15.7896	4.3176	-0.287063	0.1387	0.289412	0.363774	0.04765	0.130239	0.591245	0.001	0.00530838	1.28151	5e-05	0.000362775	0.774995	0.0001	0.000686749	0.650837	0.00045	0.00264476	0.878309	5e-05	0.000362775	1.56857	5e-05	0.000362775	1.06206	5e-05	0.000362775	0.227471	0.1931	0.366192	0.917734	5e-05	0.000362775	0.411221	0.01485	0.0515329
MAC_00874	Uncharacterized protein	4.43231	0.732065	2.65837	0.319168	3.08391	0.389735	8.71563	3.62129	6.05599	0.682003	3.96446	0.580439	-0.737517	0.0372	0.107609	-0.523296	0.11	0.24456	0.975546	0.00105	0.00553695	0.450305	0.12015	0.260508	-0.160933	0.5989	0.758524	0.214221	0.5507	0.722624	1.71306	5e-05	0.000362775	1.18782	0.001	0.00530838	0.576584	0.0981	0.224766	1.49884	5e-05	0.000362775	0.973601	0.00395	0.0172033	0.362363	0.28035	0.471337
MAC_00875	CBP4 domain-containing protein	212.783	20.4021	234.105	15.2189	233.465	15.9977	187.453	3.08276	168.84	17.1568	179.762	10.0012	0.137773	0.338	0.53347	0.133826	0.35735	0.552394	-0.182851	0.2191	0.399885	-0.333721	0.02755	0.0848903	-0.243292	0.1029	0.232882	-0.0039466	0.98045	0.989643	-0.320624	0.02665	0.0826451	-0.471494	0.0015	0.00754603	-0.381065	0.00985	0.0368694	-0.316677	0.02995	0.0907241	-0.467547	0.00185	0.00904247	-0.377118	0.01095	0.0402222
MAC_00876	Oligopeptide transporter OPT-like protein	11.0582	2.14303	9.2353	2.67164	24.6676	10.9727	17.5039	2.05229	26.153	4.71342	29.0379	3.71446	-0.259883	0.0856	0.203267	1.1575	5e-05	0.000362775	0.662559	5e-05	0.000362775	1.24186	5e-05	0.000362775	1.39282	5e-05	0.000362775	1.41738	5e-05	0.000362775	0.922442	5e-05	0.000362775	1.50175	5e-05	0.000362775	1.65271	5e-05	0.000362775	-0.494942	0.00045	0.00264476	0.0843612	0.5315	0.707395	0.235322	0.07775	0.189126
MAC_00877	Nascent polypeptide-associated complex subunit beta	2226.14	54.7249	2056.87	85.2786	1850.46	75.1607	1958.29	107.664	1829.01	67.6914	2155.6	308.907	-0.114094	0.42465	0.616849	-0.266655	0.06255	0.1606	-0.18495	0.19775	0.372445	-0.283478	0.0489	0.132879	-0.0464517	0.7501	0.861793	-0.152561	0.2843	0.475741	-0.0708556	0.6214	0.774907	-0.169384	0.23655	0.421056	0.0676423	0.6442	0.791356	0.0817056	0.56045	0.729983	-0.0168232	0.9018	0.950571	0.220203	0.1242	0.267033
MAC_00878	Putative tRNA-specific adenosine deaminase 1	22.8995	2.66143	23.3932	1.24652	19.2597	1.12484	23.9827	1.79439	22.9201	1.78816	26.537	5.12159	0.0307701	0.8409	0.915877	-0.249734	0.1117	0.247249	0.0666729	0.66485	0.805927	0.00129503	0.99195	0.995133	0.212685	0.16145	0.322846	-0.280504	0.07205	0.17852	0.0359028	0.81335	0.900338	-0.029475	0.84805	0.920257	0.181915	0.22395	0.40585	0.316407	0.0411	0.116206	0.251029	0.1078	0.241008	0.462419	0.00315	0.0142182
MAC_00879	60S ribosomal protein L24a	4598.52	249.715	4356.08	247.081	3705.43	374.179	3858.12	172.253	3547.1	276.261	4354.04	627.641	-0.0781371	0.6615	0.803573	-0.311527	0.06965	0.173984	-0.253269	0.1428	0.295525	-0.374529	0.02605	0.0811322	-0.0788133	0.65715	0.800547	-0.23339	0.169	0.333363	-0.175132	0.30755	0.500985	-0.296392	0.079	0.191404	-0.000676176	0.997	0.997738	0.0582579	0.73135	0.850062	-0.0630019	0.70515	0.833071	0.232713	0.17485	0.341288
MAC_00880	Putative peroxisomal membrane protein	290.493	17.7753	296.529	19.382	289.814	41.3425	260.188	17.9279	166.444	27.4741	202.879	15.3828	0.0296732	0.80925	0.897725	-0.00337542	0.97945	0.98922	-0.158948	0.2027	0.378952	-0.803465	5e-05	0.000362775	-0.517886	5e-05	0.000362775	-0.0330487	0.7881	0.884968	-0.188621	0.1298	0.275955	-0.833138	5e-05	0.000362775	-0.547559	5e-05	0.000362775	-0.155573	0.20905	0.387084	-0.80009	5e-05	0.000362775	-0.51451	5e-05	0.000362775
MAC_00881	40S ribosomal protein S4	3388.76	247.796	3202.16	297.842	2671.25	376.396	2703.81	126.112	2576.96	205.846	3082.88	452.39	-0.0817118	0.68915	0.822563	-0.34324	0.0875	0.20656	-0.325761	0.1032	0.23337	-0.395085	0.04695	0.128761	-0.136479	0.5034	0.685008	-0.261528	0.18755	0.358674	-0.244049	0.2182	0.398863	-0.313374	0.11325	0.249751	-0.0547672	0.78725	0.884524	0.0174791	0.9243	0.962333	-0.0518455	0.7807	0.880536	0.206761	0.29085	0.482916
MAC_00882	Short chain dehydrogenase/reductase	17.1802	1.78195	18.8115	4.32699	16.0435	4.00947	19.0295	2.41535	18.7436	1.81456	18.2113	2.0893	0.130867	0.4378	0.628693	-0.098758	0.5607	0.730179	0.147493	0.3742	0.569165	0.12565	0.4532	0.642548	0.0840869	0.6151	0.770432	-0.229624	0.1768	0.344042	0.0166263	0.92075	0.960429	-0.00521639	0.97165	0.985614	-0.0467796	0.78345	0.882318	0.246251	0.1479	0.302965	0.224408	0.18235	0.351566	0.182845	0.28545	0.476992
MAC_00883	Uncharacterized protein	1.24714	0.350666	1.5167	0.187959	2.06155	0.238716	2.20277	0.456375	2.2355	0.266393	2.15776	0.120441	0.282319	0.3663	0.561217	0.725106	0.0185	0.061587	0.820699	0.0086	0.0329914	0.841976	0.00765	0.0299612	0.790913	0.0111	0.0406735	0.442787	0.11435	0.251491	0.538381	0.05675	0.148942	0.559658	0.04815	0.131288	0.508594	0.0725	0.179357	0.0955936	0.7141	0.839222	0.116871	0.65795	0.801098	0.0658072	0.7986	0.891305
MAC_00884	MYB DNA-binding domain containing protein	36.3505	4.23582	36.3588	11.4733	20.1457	2.69474	11.5751	0.503778	18.0437	2.90671	16.6682	3.8745	0.000325586	0.9961	0.997286	-0.851505	5e-05	0.000362775	-1.65096	5e-05	0.000362775	-1.01048	5e-05	0.000362775	-1.12488	5e-05	0.000362775	-0.851831	5e-05	0.000362775	-1.65128	5e-05	0.000362775	-1.01081	5e-05	0.000362775	-1.1252	5e-05	0.000362775	-0.79945	5e-05	0.000362775	-0.158979	0.27605	0.466477	-0.27337	0.06645	0.168014
MAC_00885	Uncharacterized protein	24.5518	0.796104	21.6389	2.96287	25.0492	3.30739	27.7612	1.51812	29.891	0.696889	27.7195	0.877992	-0.182202	0.16015	0.320953	0.0289343	0.81935	0.903524	0.177236	0.1651	0.3279	0.283878	0.02415	0.0764157	0.175071	0.1672	0.330866	0.211136	0.0997	0.227568	0.359438	0.006	0.0244806	0.46608	0.00035	0.00212064	0.357272	0.0067	0.0268524	0.148302	0.2423	0.427979	0.254944	0.0439	0.122316	0.146136	0.2456	0.431877
MAC_00886	Septin	45.3293	2.25141	40.3931	4.33664	52.8775	4.62734	54.3934	3.05942	56.4922	2.41994	54.4644	2.19805	-0.166336	0.1903	0.362385	0.22221	0.07865	0.190752	0.262985	0.0371	0.10739	0.317607	0.01255	0.0448612	0.264868	0.0351	0.102789	0.388546	0.0029	0.013262	0.429322	0.00085	0.00460684	0.483943	5e-05	0.000362775	0.431204	0.00065	0.00364841	0.0407753	0.7445	0.858466	0.0953964	0.44315	0.633343	0.0426581	0.7364	0.853293
MAC_00887	ABC1 domain protein	79.1168	4.09401	65.4397	11.541	59.759	9.58856	92.8168	4.56314	92.4136	4.24156	87.1387	5.70829	-0.273818	0.0245	0.0773011	-0.404828	0.00085	0.00460684	0.230401	0.0584	0.152296	0.224121	0.0636	0.162655	0.139328	0.252	0.43916	-0.13101	0.2867	0.478381	0.50422	5e-05	0.000362775	0.49794	5e-05	0.000362775	0.413147	0.00035	0.00212064	0.635229	5e-05	0.000362775	0.62895	5e-05	0.000362775	0.544157	5e-05	0.000362775
MAC_00888	pH signal transduction protein PalI, putative	65.3461	7.35405	56.0246	8.46489	100.371	6.84176	98.0659	2.35445	100.975	3.97698	90.959	4.6944	-0.222042	0.06935	0.173429	0.619163	5e-05	0.000362775	0.585649	5e-05	0.000362775	0.627825	5e-05	0.000362775	0.477115	5e-05	0.000362775	0.841205	5e-05	0.000362775	0.807691	5e-05	0.000362775	0.849867	5e-05	0.000362775	0.699156	5e-05	0.000362775	-0.0335133	0.7753	0.877172	0.00866247	0.9399	0.970431	-0.142048	0.235	0.419167
MAC_00889	Fumarate hydratase	459.389	6.93117	435.41	35.3162	390.721	13.1692	359.243	21.542	308.079	26.2349	341.639	20.6285	-0.0773428	0.58225	0.746224	-0.233578	0.09965	0.2275	-0.354758	0.01235	0.0443092	-0.576416	5e-05	0.000362775	-0.427243	0.00265	0.0122799	-0.156236	0.26645	0.455594	-0.277416	0.04395	0.122411	-0.499073	0.0003	0.00184856	-0.3499	0.01155	0.0419702	-0.12118	0.3734	0.568413	-0.342837	0.0112	0.040976	-0.193665	0.15545	0.314016
MAC_00890	Uncharacterized protein	0.129154	0.0633222	0.156992	0.012939	0.114759	0.0350255	0.207538	0.126865	0.267594	0.168851	0.138201	0.174792	0.281598	1	1	-0.17049	1	1	0.684282	1	1	1.05095	1	1	0.0976819	1	1	-0.452087	1	1	0.402684	1	1	0.769356	1	1	-0.183916	1	1	0.854772	1	1	1.22144	1	1	0.268172	1	1
MAC_00891	MYND finger family protein	7.85825	1.25332	5.88787	0.437968	10.2028	2.42713	9.61944	0.706583	10.4327	0.54353	9.7147	1.48475	-0.416462	0.032	0.095589	0.376681	0.0399	0.113597	0.291745	0.1131	0.249522	0.408839	0.02535	0.0794332	0.305961	0.0995	0.22727	0.793142	5e-05	0.000362775	0.708207	0.00035	0.00212064	0.825301	5e-05	0.000362775	0.722423	0.00025	0.00157207	-0.0849359	0.6336	0.783813	0.0321582	0.8565	0.925119	-0.0707195	0.6921	0.824416
MAC_00892	Uncharacterized protein	1.81907	0.295324	3.28456	1.28524	5.57597	1.45352	7.11851	3.37748	5.23078	1.37687	3.04262	0.090745	0.852499	0.0043	0.018487	1.61602	5e-05	0.000362775	1.96838	5e-05	0.000362775	1.52383	5e-05	0.000362775	0.742114	0.01085	0.0399256	0.763525	0.0014	0.00710529	1.11588	5e-05	0.000362775	0.671327	0.0054	0.0223998	-0.110385	0.6593	0.802051	0.352351	0.08545	0.203046	-0.0921973	0.6631	0.804707	-0.87391	0.0007	0.00389376
MAC_00893	Pantothenate kinase	45.6688	4.95143	60.3899	11.1531	76.0487	4.0447	45.5317	2.26518	44.2792	3.10186	49.5807	2.56541	0.403097	0.00205	0.00987573	0.735714	5e-05	0.000362775	-0.00433935	0.9744	0.986634	-0.0445802	0.72685	0.84734	0.118568	0.3663	0.561217	0.332616	0.00745	0.0293182	-0.407437	0.00125	0.00644361	-0.447678	0.00075	0.00413583	-0.284529	0.02535	0.0794332	-0.740053	5e-05	0.000362775	-0.780294	5e-05	0.000362775	-0.617145	5e-05	0.000362775
MAC_00894	Uncharacterized protein	96.6002	7.73902	95.9433	3.17884	101.296	7.48887	102.254	15.3561	99.2465	3.59114	102.174	8.97025	-0.00984514	0.94415	0.97264	0.0684781	0.61415	0.769777	0.0820643	0.55075	0.722628	0.0389887	0.7756	0.87736	0.0809229	0.5575	0.727755	0.0783232	0.57045	0.737527	0.0919094	0.507	0.687883	0.0488338	0.72175	0.844314	0.090768	0.51385	0.693419	0.0135862	0.921	0.960585	-0.0294894	0.8282	0.908517	0.0124448	0.92945	0.964893
MAC_00895	Uncharacterized protein	72.9607	9.11978	69.583	2.56415	71.8339	1.33862	69.2979	1.95121	67.7082	2.49536	74.752	2.16099	-0.0683848	0.6102	0.766912	-0.0224562	0.86465	0.929765	-0.0743094	0.58305	0.746841	-0.10779	0.42715	0.61918	0.0349918	0.79015	0.886318	0.0459287	0.72775	0.847889	-0.00592455	0.9639	0.981906	-0.039405	0.7702	0.874017	0.103377	0.43115	0.622672	-0.0518532	0.6936	0.825412	-0.0853336	0.5242	0.701551	0.0574479	0.6574	0.800711
MAC_00896	Chitin synthase activator (Chs3), putative	76.3394	5.63544	55.0722	5.63783	65.0685	2.63333	75.6106	5.51599	84.5027	4.62528	87.6692	6.66698	-0.471104	0.0001	0.000686749	-0.230468	0.0548	0.145057	-0.0138403	0.9086	0.954218	0.146569	0.22665	0.409099	0.199641	0.1029	0.232882	0.240636	0.04595	0.126678	0.457264	5e-05	0.000362775	0.617673	5e-05	0.000362775	0.670745	5e-05	0.000362775	0.216628	0.07565	0.185169	0.377037	0.0027	0.0124786	0.430109	0.0005	0.0029
MAC_00897	Uncharacterized protein	28.0402	2.0872	29.5967	9.91934	20.8788	4.51254	15.6408	2.63062	14.3983	2.47143	10.1993	1.89173	0.0779389	0.65335	0.797957	-0.425459	0.0174	0.0586071	-0.842183	5e-05	0.000362775	-0.961605	5e-05	0.000362775	-1.45903	5e-05	0.000362775	-0.503398	0.00505	0.0211474	-0.920122	5e-05	0.000362775	-1.03954	5e-05	0.000362775	-1.53697	5e-05	0.000362775	-0.416724	0.0298	0.0904062	-0.536146	0.00705	0.0280143	-1.03357	5e-05	0.000362775
MAC_00898	MFS transporter, putative	32.8866	7.76623	62.9249	15.6499	23.5268	3.98971	25.1829	6.48198	26.2459	0.904776	19.7941	1.15339	0.936129	5e-05	0.000362775	-0.483199	0.00015	0.000993023	-0.385055	0.00275	0.0126842	-0.325407	0.0104	0.0385604	-0.73243	5e-05	0.000362775	-1.41933	5e-05	0.000362775	-1.32118	5e-05	0.000362775	-1.26154	5e-05	0.000362775	-1.66856	5e-05	0.000362775	0.0981436	0.44425	0.634332	0.157792	0.2191	0.399885	-0.249231	0.05905	0.15355
MAC_00899	Uncharacterized protein	4.55829	0.689264	6.37797	0.530989	6.86334	1.1019	7.4152	0.647662	6.74054	0.564323	7.08357	1.80848	0.484603	0.0845	0.201315	0.590417	0.0328	0.0974501	0.701992	0.0121	0.0435681	0.564369	0.04275	0.119874	0.635983	0.022	0.0707698	0.105814	0.6758	0.813346	0.217389	0.3879	0.58247	0.0797662	0.75635	0.865888	0.15138	0.5515	0.7232	0.111575	0.6532	0.79786	-0.0260478	0.92435	0.962336	0.0455658	0.85785	0.925942
MAC_00900	60S ribosomal protein L37	252.704	22.5221	256.391	58.3045	197.162	14.0883	205.329	14.5006	207.361	11.66	257.101	27.7575	0.0208954	0.87485	0.935535	-0.358071	0.00675	0.0270224	-0.299513	0.02685	0.0831431	-0.285308	0.0325	0.0967621	0.0248833	0.8495	0.921068	-0.378967	0.004	0.0173919	-0.320408	0.01675	0.0568269	-0.306203	0.022	0.0707698	0.00398791	0.9756	0.987225	0.0585584	0.66605	0.806714	0.0727638	0.5903	0.752079	0.382955	0.0043	0.018487
MAC_00901	Small oligopeptide transporter, OPT family	58.2102	2.75404	92.0352	12.7242	92.5831	4.41789	83.4396	5.58675	82.7536	4.393	79.0334	3.37077	0.660914	5e-05	0.000362775	0.669477	5e-05	0.000362775	0.519461	5e-05	0.000362775	0.50755	5e-05	0.000362775	0.44119	0.00025	0.00157207	0.00856269	0.94045	0.970725	-0.141453	0.24005	0.425115	-0.153364	0.21	0.388306	-0.219724	0.0716	0.177642	-0.150016	0.21415	0.393704	-0.161927	0.18665	0.357469	-0.228286	0.06155	0.158648
MAC_00902	2-dehydropantoate 2-reductase, putative	90.3175	5.12337	81.2775	11.822	108.771	6.07674	94.7687	0.840713	96.6575	2.83506	89.3062	4.70307	-0.152148	0.21205	0.39101	0.268213	0.02595	0.0808794	0.0694055	0.566	0.734092	0.0978767	0.4185	0.611155	-0.0162439	0.893	0.945688	0.420361	0.00075	0.00413583	0.221554	0.06835	0.171542	0.250025	0.04235	0.119023	0.135904	0.26635	0.455498	-0.198807	0.09815	0.224851	-0.170336	0.1637	0.32604	-0.284457	0.01815	0.0606702
MAC_00903	Uncharacterized protein	64.367	13.4039	66.7674	4.22005	61.9824	10.477	70.4056	15.8335	63.5284	3.80487	55.9525	9.99236	0.0528238	0.79335	0.888242	-0.054461	0.78975	0.886029	0.129369	0.52185	0.699723	-0.0189191	0.9207	0.960393	-0.202118	0.3338	0.52919	-0.107285	0.5925	0.75374	0.0765454	0.69875	0.828783	-0.0717429	0.72125	0.843982	-0.254942	0.21525	0.395084	0.18383	0.36365	0.558587	0.0355419	0.86215	0.928232	-0.147657	0.4786	0.664552
MAC_00904	RNAse P Rpr2/Rpp21 subunit domain-containing protein	16.8113	0.55833	19.8339	4.18172	15.8882	3.92388	15.9657	2.16575	15.3645	0.873502	16.5652	1.41655	0.238539	0.2486	0.435289	-0.0814767	0.70025	0.829811	-0.0744535	0.72785	0.847942	-0.129829	0.5452	0.718178	-0.0212792	0.91425	0.957155	-0.320016	0.128	0.273155	-0.312993	0.1342	0.282687	-0.368368	0.08245	0.197699	-0.259818	0.2072	0.38466	0.00702322	0.98095	0.989827	-0.0483522	0.82195	0.905116	0.0601975	0.77615	0.877703
MAC_00905	ATP-dependent RNA helicase	774.179	14.712	708.761	15.3264	643.233	7.28303	645.276	31.8098	627.341	41.6196	635.409	44.5404	-0.127369	0.3976	0.591716	-0.267327	0.07475	0.183479	-0.262752	0.0768	0.187379	-0.303418	0.0404	0.114669	-0.284981	0.05785	0.15121	-0.139958	0.3404	0.535953	-0.135383	0.3599	0.554813	-0.176049	0.2342	0.418303	-0.157612	0.2891	0.481011	0.00457517	0.97465	0.986735	-0.0360905	0.80185	0.893154	-0.0176542	0.9046	0.952002
MAC_00906	Uncharacterized protein	0.369698	0.32789	0.434788	0.0357137	0.252718	0.0851588	0.0710214	0.123013	0.10818	0.187374	0.0744429	0.128939	0.233963	1	1	-0.548821	1	1	-2.38002	1	1	-1.77291	1	1	-2.31214	1	1	-0.782784	1	1	-2.61399	1	1	-2.00687	1	1	-2.54611	1	1	-1.8312	1	1	-1.22409	1	1	-1.76332	1	1
MAC_00907	G1/S-specific cyclin Pcl5	73.1635	1.66034	87.7828	7.26488	59.9145	8.02056	50.9913	4.80611	57.4463	3.17286	55.9097	6.61954	0.262815	0.0307	0.0924783	-0.288219	0.0177	0.0594422	-0.520872	5e-05	0.000362775	-0.34891	0.00395	0.0172033	-0.388024	0.00165	0.008192	-0.551034	5e-05	0.000362775	-0.783687	5e-05	0.000362775	-0.611725	5e-05	0.000362775	-0.650839	5e-05	0.000362775	-0.232653	0.059	0.153481	-0.0606902	0.62085	0.774524	-0.0998051	0.4173	0.610061
MAC_00908	Uncharacterized protein	24.9808	2.37654	24.7751	0.414411	26.2539	1.83898	28.841	1.24424	29.1342	4.11046	30.3225	1.7663	-0.0119296	0.939	0.969977	0.0717164	0.63795	0.786879	0.207305	0.1647	0.327335	0.221896	0.1383	0.288815	0.279571	0.06065	0.156812	0.083646	0.5827	0.746578	0.219235	0.14275	0.295465	0.233826	0.1186	0.258123	0.291501	0.0491	0.133309	0.135589	0.35495	0.550099	0.15018	0.3127	0.506595	0.207855	0.1591	0.319373
MAC_00909	Inner membrane magnesium transporter MRS2	70.6381	1.87795	43.2358	10.7272	43.2307	4.34681	67.1524	5.29138	61.2864	5.6886	73.3117	5.82949	-0.708222	5e-05	0.000362775	-0.70839	5e-05	0.000362775	-0.0730086	0.5545	0.725399	-0.204881	0.1005	0.22884	0.0535956	0.66845	0.808354	-0.000168074	0.99665	0.997652	0.635213	5e-05	0.000362775	0.503341	0.0002	0.00128619	0.761818	5e-05	0.000362775	0.635381	5e-05	0.000362775	0.503509	0.0003	0.00184856	0.761986	5e-05	0.000362775
MAC_00910	MUS38-like protein	8.36355	0.532691	7.2235	0.765885	7.6879	0.33644	7.48602	0.700923	7.03365	0.36835	7.42371	0.70057	-0.211417	0.14385	0.297006	-0.121526	0.39755	0.591706	-0.159916	0.2624	0.451261	-0.249841	0.08445	0.201231	-0.171975	0.23275	0.416575	0.0898902	0.5393	0.713549	0.051501	0.72205	0.844458	-0.0384249	0.79535	0.889465	0.0394414	0.78835	0.885105	-0.0383892	0.78895	0.885459	-0.128315	0.3799	0.574611	-0.0504488	0.73435	0.852021
MAC_00911	Uncharacterized protein	84.7212	25.8759	128.848	40.5516	105.844	34.4627	80.6249	4.07295	32.477	11.8601	20.0553	12.8504	0.604875	0.0067	0.0268524	0.321144	0.15495	0.313327	-0.0714964	0.76435	0.870625	-1.38331	0.00015	0.000993023	-2.07874	5e-05	0.000362775	-0.283731	0.17515	0.341708	-0.676372	0.0022	0.0104899	-1.98818	5e-05	0.000362775	-2.68361	5e-05	0.000362775	-0.39264	0.08185	0.196594	-1.70445	5e-05	0.000362775	-2.39988	5e-05	0.000362775
MAC_00912	WASP-like pretein las17p	35.381	1.5459	33.6405	0.537047	27.374	1.60239	22.792	2.54111	23.9375	1.54525	26.2799	3.4493	-0.0727767	0.56625	0.734217	-0.370171	0.00405	0.0175682	-0.634449	5e-05	0.000362775	-0.5637	5e-05	0.000362775	-0.429014	0.00145	0.0073241	-0.297394	0.02085	0.0678332	-0.561672	5e-05	0.000362775	-0.490923	5e-05	0.000362775	-0.356237	0.0068	0.0271884	-0.264278	0.047	0.128864	-0.193529	0.14065	0.292359	-0.0588429	0.64845	0.794413
MAC_00913	Eukaryotic translation initiation factor eIF-1A	741.112	53.1632	709.498	35.9398	673.296	54.9607	623.345	44.5023	592.374	39.2144	724.699	35.8482	-0.0628931	0.6146	0.770062	-0.138451	0.2591	0.447317	-0.24966	0.0402	0.114211	-0.323182	0.0082	0.0316924	-0.0323095	0.78555	0.883572	-0.0755578	0.5323	0.708021	-0.186767	0.12475	0.267938	-0.260289	0.0316	0.0946327	0.0305836	0.79585	0.889736	-0.111209	0.36	0.554912	-0.184731	0.1267	0.271059	0.106141	0.37835	0.573102
MAC_00914	Uncharacterized protein	65.3468	6.76294	62.5577	3.81521	62.1219	3.36027	70.447	10.087	64.9071	8.96797	70.7635	6.9252	-0.0629301	0.6603	0.802766	-0.0730162	0.60875	0.765785	0.10842	0.4493	0.638925	-0.00973979	0.9469	0.973949	0.114888	0.4231	0.615575	-0.0100861	0.94385	0.972503	0.17135	0.23	0.413168	0.0531903	0.71195	0.837787	0.177818	0.2142	0.393778	0.181437	0.20765	0.385277	0.0632764	0.66375	0.805174	0.187904	0.19155	0.364035
MAC_00915	Acetylornithine deacetylase	14.2036	0.825248	14.1267	1.05813	13.146	0.875887	15.404	1.31862	15.6723	0.809091	14.6328	0.709953	-0.00783239	0.9579	0.979193	-0.111633	0.43785	0.628721	0.117041	0.40265	0.596677	0.141957	0.31155	0.505291	0.0429454	0.7633	0.870066	-0.103801	0.47395	0.660757	0.124873	0.3739	0.568875	0.14979	0.2873	0.479086	0.0507778	0.7179	0.841804	0.228674	0.1107	0.245651	0.25359	0.0781	0.189759	0.154578	0.2817	0.472846
MAC_00916	Homeobox and C2H2 transcription factor, putative	17.6332	2.57719	14.0844	0.809104	16.9281	3.80395	20.6806	1.68594	18.6588	0.816048	18.3399	0.909497	-0.324201	0.02915	0.0888393	-0.0588748	0.6923	0.824567	0.22998	0.1141	0.251047	0.0815612	0.5756	0.741374	0.0566914	0.69345	0.825297	0.265326	0.0769	0.187565	0.554181	0.00015	0.000993023	0.405762	0.00525	0.0218665	0.380893	0.0083	0.0320083	0.288855	0.04835	0.131698	0.140436	0.33505	0.530503	0.115566	0.42735	0.619326
MAC_00917	Phosphotransferase family protein	0.39922	0.0217528	0.313508	0.273022	0.682118	0.0605816	0.393224	0.12338	0.441168	0.107755	0.377479	0.134298	-0.348679	1	1	0.772838	1	1	-0.0218332	1	1	0.144146	1	1	-0.0807872	1	1	1.12152	1	1	0.326846	1	1	0.492825	1	1	0.267892	1	1	-0.794672	1	1	-0.628693	1	1	-0.853626	1	1
MAC_00918	Prostaglandin G/H synthase 2/cyclooxygenase 2, pgh2/cox2, putative	77.9571	5.52875	81.0348	30.8448	26.0156	5.79145	34.0695	13.7149	22.8894	5.33539	19.6042	2.23003	0.0558619	0.66285	0.804522	-1.5833	5e-05	0.000362775	-1.1942	5e-05	0.000362775	-1.768	5e-05	0.000362775	-1.99152	5e-05	0.000362775	-1.63916	5e-05	0.000362775	-1.25006	5e-05	0.000362775	-1.82386	5e-05	0.000362775	-2.04738	5e-05	0.000362775	0.389102	0.00285	0.0130708	-0.1847	0.1382	0.288655	-0.408216	0.00155	0.00776179
MAC_00919	Chitin biosynthesis protein CHS5	155.612	6.1221	134.967	0.61808	115.812	3.56915	128.341	11.0895	121.937	6.22008	126.057	5.92457	-0.205349	0.0903	0.211477	-0.426174	0.0004	0.00238366	-0.277968	0.02105	0.0683374	-0.351822	0.00415	0.0179363	-0.30388	0.0124	0.0444489	-0.220825	0.0714	0.177277	-0.0726185	0.5502	0.722181	-0.146473	0.22805	0.41081	-0.0985312	0.4138	0.606755	0.148206	0.2219	0.403398	0.0743519	0.5395	0.713722	0.122294	0.30895	0.502528
MAC_00920	Uncharacterized protein	10.6919	1.10527	9.64504	2.89902	10.9571	1.30092	17.8305	7.24458	12.7512	1.96651	9.91669	1.0184	-0.148662	0.3299	0.525028	0.0353505	0.8122	0.899578	0.737828	5e-05	0.000362775	0.254107	0.0848	0.201841	-0.10859	0.47445	0.661151	0.184012	0.23195	0.415657	0.88649	5e-05	0.000362775	0.402769	0.00865	0.0331536	0.0400723	0.7981	0.891099	0.702477	5e-05	0.000362775	0.218756	0.13695	0.286708	-0.14394	0.34565	0.541179
MAC_00921	Putative SEN1 protein	22.7546	0.176793	15.3579	0.913418	20.744	0.451602	24.2733	2.13418	25.3073	1.24843	23.0325	1.79339	-0.567172	5e-05	0.000362775	-0.133464	0.27065	0.46034	0.093211	0.43995	0.630493	0.1534	0.2017	0.377684	0.0175177	0.8818	0.939517	0.433708	0.00055	0.00315471	0.660383	5e-05	0.000362775	0.720571	5e-05	0.000362775	0.584689	5e-05	0.000362775	0.226675	0.06245	0.160397	0.286864	0.0181	0.0605372	0.150982	0.21505	0.394851
MAC_00922	Cytosine C5-DNA methyltransferase, putative	0	0	0.0259153	0.0448866	0	0	0	0	0	0	0	0	inf	1	1	0	1	1	0	1	1	0	1	1	0	1	1	#NAME?	1	1	#NAME?	1	1	#NAME?	1	1	#NAME?	1	1	0	1	1	0	1	1	0	1	1
MAC_00923	Uncharacterized protein	0	0	0	0	0	0	0.047795	0.0827834	0	0	0	0	0	1	1	0	1	1	inf	1	1	0	1	1	0	1	1	0	1	1	inf	1	1	0	1	1	0	1	1	inf	1	1	0	1	1	0	1	1
[truncated: 8,606 more rows]
[truncated: 9 more columns]
